# Supplementary material for: Chromatin dynamics and the role of G9a in gene regulation and enhancer silencing during early mouse development
Source: eLife. 2015 Nov 9;4:e09571. doi: 10.7554/eLife.09571 (PMC4729692; doi:10.7554/eLife.09571)
Supplement: Figure 2—source data 1. — Differentially expressed genes were identified using a minimum Log2(FC)>1.4 and maximum Fisher combined test of p-value<0.05. In the upregulated sample, expression was 1<log (RPKM). RNA-seq: RNA sequencing; RPKM: Reads Per Kilobase of transcript per Million mapped reads; FC: fold change. DOI: http://dx.doi.org/10.7554/eLife.09571.005 [file elife-09571-fig2-data1.xls]

## Sheet: G9aKO
		Figure 2-source data 1. List of differentially expressed genes in E6.25 G9a-/- epiblast from RNA-seq Analysis Data is based on 4 individual G9a-/- and control (G9a+/+ or G9a+/-) epiblasts. Differentially expressed genes were identified using a minimum log2(fold change)>1.4 and maximum Fisher combined test of p-value<0.05. In the upregulated sample expression was 1<log(RPKM).
transcript.ID	gene.name	biotype	G9a.cntr.1	G9a.cntr.2	G9a.cntr.3	G9a.cntr.4	G9a.KO.1	G9a.KO.2	G9a.KO.3	G9a.KO.4	G9a.KO.1.vs.cntr.log2FC	G9a.KO.1.vs.cntr.pvalue	G9a.KO.2.vs.cntr.log2FC	G9a.KO.2.vs.cntr.pvalue	G9a.KO.3.vs.cntr.log2FC	G9a.KO.3.vs.cntr.pvalue	G9a.KO.4.vs.cntr.4.log2FC	G9a.KO.4.vs.cntr.4.pvalue	Maximum FC	Minimum FC	Minimum KO expression	Minimum Cntr Expression	X2
ENSMUST00000041105	Sfmbt2	protein_coding	4.99942	5.05919	4.30021	0.262161	10.9492	8.06493	8.62945	5.135	6.12433	1.31e-190	3.24002	2.78e-57	3.80453	2.4e-79	4.87284	1.37e-30	6.12433	3.24002	5.135	0.262161	1634.48
ENSMUST00000033811	Morc4	protein_coding	5.49748	5.75789	3.75838	1.96134	11.0655	8.65908	9.02733	3.5593	5.83254	1.54e-137	3.42615	4.43e-50	3.7944	1.17e-61	1.59796	0.000632496	5.83254	1.59796	3.5593	1.96134	1152.66
ENSMUST00000179626	Rhox5	protein_coding	7.98822	8.39838	6.68897	2.7664	13.6402	11.8712	12.1603	11.5147	5.78536	1.01e-62	4.01635	9.35e-33	4.30537	2.47e-37	8.7483	6.95e-36	8.7483	4.01635	11.5147	2.7664	763.49
ENSMUST00000136626	Asz1	protein_coding	1.17055	1.40717	0.47537	-1.4472	8.45367	8.11552	8.26225	7.17313	7.38479	1.71e-46	7.04664	1.38e-42	7.19337	2.32e-44	8.62033	1.65e-17	8.62033	7.04664	7.17313	-1.4472	681.77
ENSMUST00000080929	Nxf3	protein_coding	-0.493681	2.06486	1.35546	-1.7895	7.2084	7.68358	6.89864	7.24259	5.89556	6.5e-27	6.37073	4.82e-31	5.58579	2.26e-24	9.0321	5.64e-16	9.0321	5.58579	6.89864	-1.7895	439.33
ENSMUST00000171749	AU018091	protein_coding	1.87776	3.17327	3.46387	0.318905	9.00679	6.75234	7.27864	3.93793	6.02313	1.3e-46	3.76868	1.5e-19	4.29498	3.01e-25	3.61902	4.86e-06	6.02313	3.61902	3.93793	0.318905	435.39
ENSMUST00000034150	Gab1	protein_coding	6.24907	6.46379	6.29085	6.37136	10.4564	9.17287	9.13804	8.53063	4.11881	3.9e-44	2.83526	7.49e-22	2.80043	2.14e-21	2.15927	1.9e-07	4.11881	2.15927	8.53063	6.24907	423.33
ENSMUST00000037728	Nlrp4c	protein_coding	4.52561	2.78037	4.68988	2.56986	7.66014	7.83381	7.88183	7.66982	3.44515	4.75e-23	3.61882	2.69e-25	3.66684	5.08e-26	5.09996	1.65e-18	5.09996	3.44515	7.66014	2.56986	414.33
ENSMUST00000081908	Rpl10l	protein_coding	5.59745	4.04198	5.83953	6.4885	9.65575	9.16079	9.4244	9.94797	4.30818	2.2e-30	3.81321	3.7e-24	4.07682	1.69e-27	3.45946	1.85e-10	4.30818	3.45946	9.16079	4.04198	412.6
ENSMUST00000062723	Acpp	protein_coding	1.36994	1.74916	1.65273	-0.385314	6.95788	7.05571	6.08543	6.1953	5.35849	1.69e-27	5.45631	2e-28	4.48604	9.45e-20	6.58062	9.81e-14	6.58062	4.48604	6.08543	-0.385314	398.37
ENSMUST00000116402	Esrrb	protein_coding	1.96944	2.42107	2.47066	-2.32638	8.52544	6.31604	5.95244	3.59351	6.22143	2.23e-40	4.01203	3.37e-18	3.64843	3.18e-15	5.91989	1.13e-07	6.22143	3.64843	3.59351	-2.32638	361.82
ENSMUST00000070141	Magea8	protein_coding	1.35597	-0.892836	0.98272	-0.939848	7.81404	7.8068	7.68689	6.36831	7.05575	3.71e-23	7.04851	4.08e-23	6.9286	1.87e-22	7.30816	3.06e-08	7.30816	6.9286	6.36831	-0.939848	341.07
ENSMUST00000060265	Naa11	protein_coding	2.65049	3.40168	2.37034	3.39029	7.48471	6.50053	7.12946	8.01872	4.60908	1.89e-25	3.62489	4.81e-16	4.25383	6.24e-22	4.62843	2.32e-12	4.62843	3.62489	6.50053	2.37034	335.63
ENSMUST00000179324	Gm11019	lincRNA	5.46422	5.17761	3.81795	1.76985	9.41386	7.58556	7.87536	6.00703	4.43747	5e-35	2.60917	7.85e-13	2.89898	9.82e-16	4.23718	2.07e-11	4.43747	2.60917	6.00703	1.76985	332.02
ENSMUST00000052283	Mageb16	protein_coding	1.99126	3.88929	2.92613	-0.111919	8.8656	6.79197	7.29243	4.6747	5.72839	2.83e-32	3.65476	1.01e-13	4.15522	1.01e-17	4.78662	2.05e-06	5.72839	3.65476	4.6747	-0.111919	309.6
ENSMUST00000102832	Cd3e	protein_coding	1.1424	0.308622	3.05865	0.26161	7.46499	8.35618	7.58534	7.54936	5.49194	9.21e-18	6.38313	3.27e-23	5.61229	1.58e-18	7.28775	4.33e-10	7.28775	5.49194	7.46499	0.26161	307.1
ENSMUST00000118314	C77370	protein_coding	4.02699	2.25664	2.93289	1.3429	7.47468	5.78551	5.60383	3.63476	4.21579	7.51e-37	2.52662	4.02e-14	2.34494	2.39e-12	2.29186	1.2e-05	4.21579	2.29186	3.63476	1.3429	304.23
ENSMUST00000057860	Pdha2	protein_coding	-1.16185	-0.410657	-0.120063	-1.45767	6.05481	6.97251	7.10025	6.80102	6.55614	2.34e-16	7.47383	4.83e-21	7.60158	9.42e-22	8.25869	2.55e-09	8.25869	6.55614	6.05481	-1.45767	301.94
ENSMUST00000074077	Bmp4	protein_coding	4.88677	5.67479	5.0013	4.84149	9.76272	7.79979	7.88677	6.60431	4.53137	1.26e-36	2.56844	2.07e-12	2.65542	2.83e-13	1.76282	0.000567485	4.53137	1.76282	6.60431	4.84149	291.87
ENSMUST00000147604	Aim2	protein_coding	6.11132	5.9744	4.65833	3.8613	8.30699	8.47204	8.82008	8.98987	2.59494	8.43e-12	2.76	3.14e-13	3.10804	1.52e-16	5.12858	4.99e-17	5.12858	2.59494	8.30699	3.8613	256.5
ENSMUST00000108689	Myh3	protein_coding	3.61816	4.04742	0.700581	3.5329	6.44969	6.43756	6.82426	6.78703	3.1068	3.11e-15	3.09467	4.03e-15	3.48137	4.96e-19	3.25413	6.36e-09	3.48137	3.09467	6.43756	0.700581	255.14
ENSMUST00000022212	Plk2	protein_coding	4.37356	1.80282	5.61126	0.618304	6.82423	7.98048	6.8162	8.89284	2.21738	6.8e-08	3.37363	1.26e-16	2.20935	6.88e-08	8.27454	2.82e-23	8.27454	2.20935	6.8162	0.618304	243.06
ENSMUST00000101212	Nup62cl	protein_coding	1.6658	5.22434	4.21008	1.95494	9.33814	6.99823	7.45588	5.141	5.03887	7.5e-28	2.69897	1.03e-08	3.15661	1e-11	3.18606	3.83e-05	5.03887	2.69897	5.141	1.6658	232.69
ENSMUST00000097580	Gm949	protein_coding	2.41649	3.29321	3.58381	-1.33876	7.73792	7.00157	7.12699	4.81559	4.56096	5.88e-17	3.8246	2.45e-12	3.95002	4e-13	6.15435	6.54e-07	6.15435	3.8246	4.81559	-1.33876	213.79
ENSMUST00000020974	Id2	protein_coding	5.95883	6.84752	6.7718	6.80051	10.5117	8.24497	8.30366	8.62417	3.93364	7.82e-31	1.66686	2.92e-06	1.72555	1.14e-06	1.82366	0.000124187	3.93364	1.66686	8.24497	5.95883	209.49
ENSMUST00000088481	Magea10	protein_coding	-0.79013	-0.0389406	-0.748347	-1.08595	6.13013	7.10815	6.12873	6.78539	6.61281	4.87e-12	7.59083	1.77e-15	6.61141	4.58e-12	7.87134	1.35e-06	7.87134	6.61141	6.12873	-1.08595	199.28
ENSMUST00000023829	Cdkn1a (p21)	protein_coding	6.56639	5.38317	7.06455	6.65808	9.03485	9.66964	8.95551	8.71427	2.54106	1.11e-11	3.17585	1.79e-17	2.46171	4.43e-11	2.05619	0.000120817	3.17585	2.05619	8.71427	5.38317	193.29
ENSMUST00000078568	Nhedc1	protein_coding	4.7938	3.74981	4.16239	2.70279	7.59844	7.14031	7.05581	6.78315	3.29839	3.17e-12	2.84027	2.38e-09	2.75576	6.76e-09	4.08035	8.28e-08	4.08035	2.75576	6.78315	2.70279	162.91
ENSMUST00000023129	Gtsf1	protein_coding	2.69736	1.71159	2.41722	5.6342	8.0174	7.3788	8.06892	7.64675	5.68562	1.32e-12	5.04702	3.08e-10	5.73714	7.83e-13	2.01255	0.0500005	5.73714	2.01255	7.3788	1.71159	160.25
ENSMUST00000068968	4933427D06Rik	protein_coding	2.27234	3.96213	2.4296	0.713485	6.07853	6.37921	7.54225	5.40389	2.97397	1.01e-06	3.27465	5.75e-08	4.43769	1.05e-13	4.69041	5.02e-06	4.69041	2.97397	5.40389	0.713485	145.13
ENSMUST00000180198	Gm5128	protein_coding	-1.86629	-2.1151	-1.82451	-2.16211	6.0976	4.50361	4.0406	3.7147	8.02731	7.68e-13	6.43333	9.46e-09	5.97031	1.17e-07	5.87682	0.00163171	8.02731	5.87682	3.7147	-2.16211	137.5
ENSMUST00000029369	Sohlh2	protein_coding	5.36049	1.58812	4.27103	2.12607	7.72843	6.39716	6.94022	6.76155	3.32706	1.5e-11	1.99579	6.34e-05	2.53884	2.73e-07	4.63548	3.25e-08	4.63548	1.99579	6.39716	1.58812	133.89
ENSMUST00000169499	Gm14569	protein_coding	-2.29957	-2.54838	-2.25779	-1.01043	3.10973	5.74493	2.65462	5.13185	5.47272	6.2e-07	8.10793	2.87e-14	5.01762	6.92e-06	6.14228	7.97e-05	8.10793	5.01762	2.65462	-2.54838	133.59
ENSMUST00000005532	Nid1	protein_coding	5.6848	5.31357	4.84394	0.769368	8.33909	7.40865	7.99691	5.236	3.01804	7.45e-10	2.0876	2.47e-05	2.67586	4.89e-08	4.46663	9.79e-08	4.46663	2.0876	5.236	0.769368	129.2
ENSMUST00000169540	Magea5	protein_coding	2.01485	0.181072	1.05663	-0.86594	7.29204	6.71406	6.2243	4.17594	6.018	1.19e-10	5.44001	4.74e-09	4.95025	8.99e-08	5.04188	0.00550671	6.018	4.95025	4.17594	-0.86594	126.89
ENSMUST00000002025	Tktl2	protein_coding	-0.955725	-1.20454	1.08606	2.20788	6.20846	5.43256	6.6217	4.10444	6.17405	1e-09	5.39814	9.28e-08	6.58729	7.81e-11	1.89656	0.166276	6.58729	1.89656	4.10444	-1.20454	123.97
ENSMUST00000096045	Dppa4	protein_coding	6.44941	5.45985	5.71196	5.68847	8.51389	7.71014	7.60539	7.64479	2.57669	1.88e-11	1.77295	6.01e-06	1.66819	2.07e-05	1.95632	0.000335335	2.57669	1.66819	7.60539	5.45985	111.01
ENSMUST00000050047	D630023F18Rik	protein_coding	3.59626	3.09591	2.69463	2.74404	6.28771	7.34525	6.50699	4.84656	3.11148	1.78e-06	4.16902	1.2e-10	3.33077	2.76e-07	2.10251	0.029949	4.16902	2.10251	4.84656	2.69463	109.39
ENSMUST00000120490	Abca16	protein_coding	-0.267138	-2.51595	-1.22536	-0.977998	4.27967	4.13929	4.39107	3.76132	5.3451	1.16e-07	5.20472	2.5e-07	5.4565	5.97e-08	4.73932	0.0030434	5.4565	4.73932	3.76132	-2.51595	107.2
ENSMUST00000026014	Efhc2	protein_coding	3.81463	2.87067	2.57631	3.71675	7.36913	5.73053	6.17838	5.50218	4.18068	9.34e-12	2.54208	4.48e-05	2.98993	1.19e-06	1.78543	0.0404975	4.18068	1.78543	5.50218	2.57631	104.52
ENSMUST00000092070	Lama3	protein_coding	1.75574	3.29542	2.92305	0.737451	5.28253	4.76163	4.3038	5.30594	2.49041	1.7e-07	1.96951	4.81e-05	1.51168	0.0022136	4.56849	1.72e-09	4.56849	1.51168	4.3038	0.737451	103.65
ENSMUST00000036023	1700018B24Rik	protein_coding	1.83264	0.583831	2.45939	0.536819	8.36296	6.58957	7.3718	6.41364	6.54731	3e-09	4.77392	1.45e-05	5.55615	3.83e-07	5.87682	0.00327241	6.54731	4.77392	6.41364	0.536819	102.53
ENSMUST00000114725	Gm364	protein_coding	-1.02551	1.53304	0.0162751	-1.32133	5.89476	5.84035	6.04058	3.41799	5.34335	3.15e-07	5.28895	4.14e-07	5.48918	1.45e-07	4.73932	0.0171382	5.48918	4.73932	3.41799	-1.32133	98.96
ENSMUST00000159236	Tnik	protein_coding	1.70524	1.01585	1.70854	0.409413	3.65321	3.63984	3.98087	4.8394	2.14204	6.69e-05	2.12867	7.46e-05	2.4697	3.3e-06	4.42999	1.29e-07	4.42999	2.12867	3.63984	0.409413	95.2
ENSMUST00000069477	Magea2	protein_coding	-0.677891	-0.926702	-0.636108	-0.973714	5.16437	6.27698	5.8299	4.71669	5.90568	7.03e-06	7.01829	9.03e-08	6.57122	5.2e-07	5.69041	0.0104983	7.01829	5.69041	4.71669	-0.973714	94.22
ENSMUST00000006367	Htra1	protein_coding	4.90651	3.929	2.89767	-1.24729	8.04879	5.92745	6.76963	2.39249	3.91468	1.54e-11	1.79334	0.00278742	2.63552	6.51e-06	3.63978	0.0235494	3.91468	1.79334	2.39249	-1.24729	92.94
ENSMUST00000101636	Gm9	protein_coding	-0.658885	2.79274	-0.617102	-0.954708	7.09382	4.37981	5.24801	5.50707	5.64056	2.85e-09	2.92655	0.00355248	3.79474	8.17e-05	6.46178	0.000321352	6.46178	2.92655	4.37981	-0.954708	85.54
ENSMUST00000078574	Xlr5a	protein_coding	1.67878	1.42997	-0.601364	-0.938969	5.63405	5.37209	5.76624	5.87074	4.50639	1.14e-05	4.24443	3.77e-05	4.63859	5.93e-06	6.80971	0.000453726	6.80971	4.24443	5.37209	-0.938969	82.6
ENSMUST00000087950	Cbln4	protein_coding	1.53587	-1.71294	-1.42234	-0.759949	4.62325	4.14394	5.16523	5.47336	4.36914	2.09e-05	3.88983	0.000165611	4.91113	1.62e-06	6.2333	0.000552928	6.2333	3.88983	4.14394	-1.71294	80.63
ENSMUST00000102840	Ass1	protein_coding	8.70451	7.47076	8.51704	7.55853	10.0388	10.1166	9.75237	9.33733	1.7155	1.35e-05	1.79327	5.26e-06	1.42909	0.000291343	1.7788	0.00143135	1.79327	1.42909	9.33733	7.47076	76.12
ENSMUST00000081134	Sycp2	protein_coding	1.02675	1.71082	1.69656	2.66381	4.19385	4.52218	4.8341	4.76926	2.68252	0.000107447	3.01085	1.16e-05	3.32277	1.08e-06	2.10544	0.0267861	3.32277	2.10544	4.19385	1.02675	75.72
ENSMUST00000074608	1700029P11Rik	protein_coding	5.24808	5.11174	4.66537	3.64969	7.60981	7.90449	7.31475	7.20458	2.58071	8.89e-05	2.87538	1.15e-05	2.28564	0.000547625	3.55489	0.000506948	3.55489	2.28564	7.20458	3.64969	71.6
ENSMUST00000097175	Dppa2	protein_coding	4.32408	0.865818	5.28569	2.14073	7.65733	5.87156	6.40925	6.19039	3.31487	2.25e-07	1.52909	0.0169994	2.06679	0.00120302	4.04966	0.00016942	4.04966	1.52909	5.87156	0.865818	69.58
ENSMUST00000099623	Ano3	protein_coding	-2.66799	-1.33184	-2.6262	-2.96381	1.58931	4.33538	1.97587	3.61008	3.65508	0.00409065	6.40115	1.04e-07	4.04164	0.00114651	6.57389	0.00192012	6.57389	3.65508	1.58931	-2.96381	69.21
ENSMUST00000174558	Gm2381	protein_coding	3.50619	3.38291	3.5148	3.70513	6.26341	5.02608	5.04675	5.75328	2.7942	8.74e-08	1.55686	0.0040277	1.57754	0.00343477	2.04815	0.00556154	2.7942	1.55686	5.02608	3.38291	65.27
ENSMUST00000044790	Foxn4	protein_coding	0.805512	1.5567	1.11033	1.50969	3.99722	5.19744	4.82343	5.4125	2.80639	0.00256564	4.00661	1.01e-05	3.6326	6.48e-05	3.90281	0.00463205	4.00661	2.80639	3.99722	0.805512	64.97
ENSMUST00000098674	2410076I21Rik	protein_coding	6.61936	5.47489	5.95393	5.21106	7.81943	8.18929	8.1678	7.81703	1.72648	0.00129191	2.09633	8.13e-05	2.07484	9.3e-05	2.60597	0.0009051	2.60597	1.72648	7.81703	5.21106	64.72
ENSMUST00000153567	1700019E08Rik	lincRNA	0.735717	0.486906	1.7775	0.439894	6.37768	4.72711	6.29031	8.26667	5.26332	4.03e-05	3.61275	0.00742217	5.17594	5.3e-05	7.82678	0.000652355	7.82678	3.61275	4.72711	0.439894	64.41
ENSMUST00000051569	Pnma5	protein_coding	3.95182	1.15281	3.84551	-1.70155	6.16546	5.23336	5.64955	3.03776	2.74713	8.78e-06	1.81503	0.00371568	2.23122	0.000317176	4.73932	0.00149285	4.73932	1.81503	3.03776	-1.70155	63.6
ENSMUST00000101561	Gm773	protein_coding	0.156099	2.22922	0.197882	-0.139723	6.76703	6.30669	5.54842	5.52559	5.55497	2.3e-05	5.09463	0.000101358	4.33635	0.000985705	5.66532	0.0177495	5.66532	4.33635	5.52559	-0.139723	61.66
ENSMUST00000096170	Gm5622	protein_coding	1.41516	-0.83365	-0.543056	-0.880661	6.34802	5.9591	3.73709	2.12169	5.96423	3.05e-06	5.5753	1.18e-05	3.35329	0.00998917	3.00235	0.264958	5.96423	3.00235	2.12169	-0.880661	59.96
ENSMUST00000021757	Aoah	protein_coding	3.86029	2.61148	4.33503	3.52794	5.67013	6.14643	6.21784	5.88875	1.90399	0.00228313	2.38029	0.000123477	2.45171	7.28e-05	2.3608	0.00987211	2.45171	1.90399	5.67013	2.61148	58.46
ENSMUST00000109284	CN725425	protein_coding	4.41798	4.63865	4.49629	2.29619	6.67116	6.43625	6.3025	6.47654	2.15061	0.000659266	1.9157	0.00257051	1.78195	0.00511842	4.18035	3.96e-05	4.18035	1.78195	6.3025	2.29619	57.4
ENSMUST00000090025	Aard	protein_coding	3.81482	2.71801	3.49403	-0.650927	7.95627	5.89932	5.50288	2.50343	4.54488	7.63e-08	2.48793	0.00329308	2.09148	0.0139248	3.15435	0.133658	4.54488	2.09148	2.50343	-0.650927	56.78
ENSMUST00000035563	Tspan8	protein_coding	4.51746	2.03161	2.51485	4.34717	6.084	5.25801	5.9488	7.9404	2.63744	0.000295137	1.81145	0.0148189	2.50224	0.000590774	3.59324	0.000920771	3.59324	1.81145	5.25801	2.03161	53.53
ENSMUST00000169651	Nlrx1	protein_coding	2.10057	0.944874	2.5574	2.29018	5.82795	4.16083	4.94857	3.90021	3.81595	4.2e-06	2.14883	0.0103813	2.93657	0.000389412	1.61003	0.191106	3.81595	1.61003	3.90021	0.944874	52.91
ENSMUST00000105741	Gm13225	protein_coding	-1.53217	-0.780979	-1.49039	-1.82799	3.31009	2.1373	1.27519	2.17436	4.53481	3.85e-06	3.36201	0.00230712	2.4999	0.0458177	4.00235	0.0189497	4.53481	2.4999	1.27519	-1.82799	51.18
ENSMUST00000045976	Timm8a2	protein_coding	1.79087	-0.0429052	0.247689	-0.0899167	5.87824	5.90512	6.33519	4.60049	4.97309	0.000737596	4.99996	0.00069013	5.43003	0.000231904	4.69041	0.0871071	5.43003	4.69041	4.60049	-0.0899167	50.6
ENSMUST00000001963	Ace	protein_coding	2.10618	0.342796	-0.173965	-2.51157	5.48634	3.82295	3.61714	1.02129	4.37974	4.64e-06	2.71635	0.00452665	2.51055	0.00872255	3.53287	0.102908	4.37974	2.51055	1.02129	-2.51157	49.39
ENSMUST00000067048	Dnahc5	protein_coding	-0.717582	-1.32896	0.677838	0.51711	1.72343	2.81171	1.60435	4.59746	1.9266	0.0148323	3.01488	9.73e-05	1.80752	0.0220757	4.08035	0.000590405	4.08035	1.80752	1.60435	-1.32896	49.39
ENSMUST00000169754	Inpp5d	protein_coding	2.98516	0.33425	-2.18251	-2.52012	3.35493	4.64157	4.2835	4.73857	1.70737	0.0609055	2.994	0.000861218	2.63593	0.00334219	7.25869	0.000120961	7.25869	1.70737	3.35493	-2.52012	49.15
ENSMUST00000032491	Tnfrsf1a	protein_coding	4.01417	5.24453	4.65542	3.76142	6.98789	6.21415	6.18895	5.91577	2.26415	4.15e-05	1.49042	0.00894852	1.46521	0.0101271	2.15435	0.00656175	2.26415	1.46521	5.91577	3.76142	48.85
ENSMUST00000150529	Gm13227	processed_transcript	5.90926	4.51361	4.16677	3.98117	7.566	7.24902	7.34738	8.23313	2.49416	0.00197113	2.17718	0.00724539	2.27554	0.00480394	4.25196	0.00103667	4.25196	2.17718	7.24902	3.98117	46.73
ENSMUST00000166853	Tap1	protein_coding	0.692177	1.31784	0.470926	0.133321	3.65402	4.84993	4.06141	2.10325	2.78096	0.00681377	3.97687	8.22e-05	3.18835	0.00169506	1.96993	0.238716	3.97687	1.96993	2.10325	0.133321	44.42
ENSMUST00000029266	Anxa5	protein_coding	5.52573	5.40902	5.68147	4.768	9.58315	7.31523	8.2488	6.26483	4.04008	9.78e-06	1.77215	0.0488777	2.70572	0.00264489	1.49682	0.262705	4.04008	1.49682	6.26483	4.768	43.65
ENSMUST00000048675	Magea4	protein_coding	0.149992	-0.0988186	1.19178	-0.14583	5.28176	3.55642	6.03264	6.64079	4.75312	0.00170766	3.02779	0.0580276	5.504	0.000271254	6.78662	0.0139619	6.78662	3.02779	3.55642	-0.14583	43.41
ENSMUST00000023330	Morc1	protein_coding	1.2828	1.54856	3.32459	0.501553	4.23525	5.12981	4.49782	5.61196	1.87752	0.0327495	2.77208	0.00144345	2.14009	0.0142601	5.11041	0.000737148	5.11041	1.87752	4.23525	0.501553	42.85
ENSMUST00000114384	Gm1673	protein_coding	3.67527	3.01142	0.717052	2.37945	8.45613	5.0817	5.06759	5.60419	5.55036	1.49e-06	2.17593	0.0665943	2.16181	0.0673958	3.22474	0.0815791	5.55036	2.16181	5.06759	0.717052	42.66
ENSMUST00000096454	Rhox7	protein_coding	0.107954	-0.140856	0.149737	-0.187868	5.78029	4.99981	3.91531	5.87338	5.73576	0.000493025	4.95528	0.0026953	3.87078	0.0220943	6.06124	0.0372627	6.06124	3.87078	3.91531	-0.187868	41.27
ENSMUST00000069419	1700011F14Rik	protein_coding	5.57912	4.88552	1.00619	-0.331412	6.6517	6.6035	6.28634	6.53444	1.92607	0.0186098	1.87788	0.0219191	1.56071	0.0584249	6.86585	5.39e-05	6.86585	1.56071	6.28634	-0.331412	40.95
ENSMUST00000113969	Mageb4	protein_coding	-1.19161	0.559583	-1.14982	-1.48743	4.89577	4.02218	3.13032	3.95971	5.24051	0.00058716	4.36693	0.0042235	3.47507	0.0249041	5.44714	0.0519022	5.44714	3.47507	3.13032	-1.48743	39.12
ENSMUST00000120870	Gm13230	pseudogene	4.00379	3.41794	2.78254	2.44493	5.4604	5.43407	5.79387	6.59929	1.9745	0.0189394	1.94817	0.0206695	2.30797	0.00554583	4.15435	0.00167593	4.15435	1.94817	5.43407	2.44493	38.86
ENSMUST00000041099	Neurod1	protein_coding	3.48209	1.18266	2.57279	2.23518	4.38391	5.86849	4.35203	5.66056	1.69136	0.0495753	3.17594	0.000193711	1.65948	0.053152	3.42538	0.0106023	3.42538	1.65948	4.35203	1.18266	38.07
ENSMUST00000172709	Xlr3a	protein_coding	3.36402	1.81265	2.19635	1.18068	4.7338	4.71481	4.64642	4.06621	2.11774	0.00605516	2.09875	0.00653645	2.03037	0.00840473	2.88554	0.0177105	2.88554	2.03037	4.06621	1.18068	37.9
ENSMUST00000134801	Gm14066	lincRNA	-0.964899	-1.21371	-0.923116	-1.26072	2.2924	4.1196	2.49453	6.27214	3.32072	0.0451302	5.14792	0.000836826	3.52285	0.0301881	7.53287	0.00572049	7.53287	3.32072	2.2924	-1.26072	37.7
ENSMUST00000036215	Foxj1	protein_coding	4.26682	3.18794	2.531	4.9252	5.44166	5.38107	5.20542	6.32699	1.93309	0.00259772	1.87251	0.0035909	1.69686	0.00849241	1.40179	0.105702	1.93309	1.40179	5.20542	2.531	37.2
ENSMUST00000166837	Gm17067	protein_coding	3.781	2.99162	3.63014	3.48518	5.0383	5.31397	5.33559	5.1505	1.53233	0.0159112	1.80799	0.00420725	1.82962	0.00366404	1.66532	0.0632504	1.82962	1.53233	5.0383	2.99162	35.96
ENSMUST00000114518	Xlr5b	protein_coding	0.940059	1.69125	-0.603121	0.0592737	4.83479	4.56888	4.44256	5.13963	3.88213	0.00648926	3.61623	0.0114211	3.4899	0.0145911	5.08035	0.0420347	5.08035	3.4899	4.44256	-0.603121	33.81
ENSMUST00000022232	4933425L06Rik	protein_coding	-0.0322369	-1.28105	1.33147	-1.32806	4.41269	3.80715	3.92196	4.9801	4.03196	0.00604306	3.42643	0.0196441	3.54123	0.0155861	6.30816	0.0288441	6.30816	3.42643	3.80715	-1.32806	33.49
ENSMUST00000033207	Zp2	protein_coding	1.53074	2.1564	-1.01244	-1.35004	2.84051	5.33406	4.07506	5.48238	1.45405	0.271276	3.94761	0.00139356	2.68861	0.031767	6.83243	0.00489155	6.83243	1.45405	2.84051	-1.35004	33.3
ENSMUST00000114503	Xlr5c	protein_coding	-0.648412	-0.897223	0.393371	-0.944234	4.1394	4.68402	3.74391	4.66955	4.40917	0.0107317	4.95379	0.00415561	4.01367	0.0202731	5.61379	0.0814438	5.61379	4.01367	3.74391	-0.944234	32.85
ENSMUST00000023006	Lrrc6	protein_coding	2.82776	1.57895	0.64715	-1.27542	4.80822	3.74876	4.0204	5.48775	2.85051	0.00881368	1.79106	0.106969	2.0627	0.0607536	6.76316	0.00202752	6.76316	1.79106	3.74876	-1.27542	31.94
ENSMUST00000005488	Casp14	protein_coding	-1.14394	-1.39275	0.897844	-1.43976	2.26536	4.74792	4.37962	3.94725	2.41916	0.141034	4.90172	0.00243448	4.53342	0.00481282	5.38701	0.0831284	5.38701	2.41916	2.26536	-1.43976	31.6
ENSMUST00000112562	Magea6	protein_coding	-0.202386	-0.451196	-0.160603	-0.498208	4.97245	5.7401	3.79761	2.33422	5.23826	0.00628409	6.00591	0.00186122	4.06342	0.0347684	2.83243	0.477267	6.00591	2.83243	2.33422	-0.498208	30.91
ENSMUST00000021674	Fos	protein_coding	4.32022	-1.25052	2.62504	2.40291	5.13006	5.27262	4.97557	5.44179	1.98353	0.0200974	2.12609	0.012654	1.82905	0.0315101	3.03888	0.0242996	3.03888	1.82905	4.97557	-1.25052	30.9
ENSMUST00000047286	Mat1a	protein_coding	-1.60619	0.144997	0.0205531	-1.90201	1.48118	3.56577	1.97877	5.1878	1.77422	0.234256	3.85881	0.00431907	2.27181	0.111247	7.08981	0.00555901	7.08981	1.77422	1.48118	-1.90201	28.57
ENSMUST00000130509	Wdfy4	protein_coding	-3.24631	-1.17319	-2.20453	-1.95717	1.23338	1.23051	3.07562	1.33469	3.20335	0.0447089	3.20048	0.0448909	5.04559	0.0014788	3.29186	0.212742	5.04559	3.20048	1.23051	-3.24631	28.55
ENSMUST00000142594	Brp44l	protein_coding	2.72282	2.88905	3.17964	4.3656	6.05812	4.74592	5.45978	6.6052	3.11512	0.00299148	1.80292	0.096569	2.51679	0.0173477	2.2396	0.140184	3.11512	1.80292	4.74592	2.72282	28.34
ENSMUST00000094753	Ceacam20	protein_coding	1.12782	-0.705954	0.58464	-1.75297	4.43759	2.21232	4.21528	3.91235	3.91889	0.00694329	1.69362	0.243926	3.69658	0.0105734	5.66532	0.0514726	5.66532	1.69362	2.21232	-1.75297	27.79
ENSMUST00000117421	Gm6310	pseudogene	1.50583	0.257021	0.547614	0.210009	6.5474	5.04977	4.20627	4.36436	5.67384	0.00254598	4.1762	0.0246378	3.33271	0.074777	4.15435	0.247774	5.67384	3.33271	4.20627	0.210009	27.33
ENSMUST00000109428	Tox2	protein_coding	2.10156	1.26778	1.14334	-0.194266	4.83279	3.50799	3.21703	3.18248	3.26256	0.00328813	1.93776	0.0853132	1.64681	0.144135	3.37675	0.0826518	3.37675	1.64681	3.18248	-0.194266	25.22
ENSMUST00000099816	Cd80	protein_coding	0.309292	0.0604816	-0.648925	0.01347	3.20402	5.64172	2.47922	3.36946	3.24318	0.0664695	5.68088	0.00129613	2.51837	0.162231	3.35599	0.272656	5.68088	2.51837	2.47922	-0.648925	24.96
ENSMUST00000093029	Slc47a2	protein_coding	-0.167358	1.16879	-1.12558	-1.46318	2.08994	3.96154	3.78684	3.69117	1.8281	0.252264	3.6997	0.0127937	3.525	0.0177324	5.15435	0.0666652	5.15435	1.8281	2.08994	-1.46318	24.95
ENSMUST00000045736	Heatr7b2	protein_coding	-1.30431	-2.55312	-1.26252	-2.60013	2.87053	2.48064	2.01762	2.09028	4.46691	0.0174232	4.07702	0.029426	3.614	0.0526046	4.69041	0.206111	4.69041	3.614	2.01762	-2.60013	24.2
ENSMUST00000009740	Taf7l	protein_coding	-0.869678	-1.11849	-0.827895	1.64185	2.2177	2.21483	2.83076	4.25189	3.1508	0.0500822	3.14792	0.0502959	3.76386	0.0135845	2.61003	0.187156	3.76386	2.61003	2.21483	-1.11849	23.92
ENSMUST00000078775	Xlr4a	protein_coding	3.03596	3.52412	1.90782	-0.429786	5.41284	5.75789	4.9535	4.65057	2.44575	0.0530409	2.7908	0.0267728	1.98641	0.117544	5.08035	0.0451149	5.08035	1.98641	4.65057	-0.429786	23.59
ENSMUST00000024711	Gpr115	protein_coding	2.71055	1.02116	2.5044	-0.833203	4.40797	3.71705	4.36951	3.20868	2.16011	0.0359976	1.46918	0.15261	2.12164	0.0388728	4.04188	0.0395878	4.04188	1.46918	3.20868	-0.833203	23.36
ENSMUST00000098479	Zfp319	protein_coding	2.60258	0.238297	1.26586	-1.39368	3.57448	3.15657	4.2597	5.09696	1.88771	0.121515	1.46981	0.227507	2.57293	0.0337888	6.49064	0.0090855	6.49064	1.46981	3.15657	-1.39368	23.35
ENSMUST00000046331	Wdr20b	protein_coding	-1.08303	-1.33184	-1.04124	-1.37885	4.13363	1.32341	2.72433	4.6235	5.28008	0.00771683	2.46985	0.244186	3.87078	0.0516506	6.00235	0.10399	6.00235	2.46985	1.32341	-1.37885	23
ENSMUST00000120731	Gm12479	pseudogene	-0.592144	0.159045	-0.550361	-0.887966	4.78063	3.88468	3.40786	3.11438	5.06532	0.0141594	4.16937	0.0421653	3.69255	0.0716769	4.00235	0.324185	5.06532	3.69255	3.11438	-0.887966	22.37
ENSMUST00000172625	Gm18128	pseudogene	2.04286	3.11598	2.08464	0.747037	6.08443	5.88225	5.29079	3.57946	3.57922	0.0207552	3.37704	0.0294242	2.78558	0.074585	2.83243	0.406672	3.57922	2.78558	3.57946	0.747037	21.79
ENSMUST00000025727	Trpd52l3	protein_coding	-1.08562	-0.334426	-1.04383	-1.38144	3.7022	4.39121	1.91438	2.25834	4.48036	0.0315574	5.16937	0.0137882	2.69255	0.201471	3.63978	0.387795	5.16937	2.69255	1.91438	-1.38144	20.58
ENSMUST00000068551	Xlr4c	protein_coding	1.08011	-0.753662	-0.463069	-0.800674	3.75245	3.16461	4.01871	4.35368	3.55805	0.0544587	2.97022	0.110153	3.82431	0.0381905	5.15435	0.155386	5.15435	2.97022	3.16461	-0.800674	20.49
ENSMUST00000096899	BC061237	protein_coding	0.233082	1.56923	2.27486	-0.0627405	5.40792	5.67514	3.55501	3.57704	3.82579	0.027869	4.09301	0.018938	1.97288	0.255987	3.63978	0.31608	4.09301	1.97288	3.55501	-0.0627405	20.12
ENSMUST00000140802	D930020B18Rik	protein_coding	0.296308	1.46253	0.338091	0.000485419	2.49916	4.1534	4.41178	2.0553	1.69235	0.266785	3.34659	0.0246949	3.60498	0.0153633	2.05482	0.448101	3.60498	1.69235	2.0553	0.000485419	20
ENSMUST00000037372	Nlrp4f	protein_coding	-0.742917	-1.99173	-1.70113	-2.03874	2.98831	2.24848	2.90094	1.37865	4.3635	0.0357619	3.62366	0.0801279	4.27612	0.0390861	3.41739	0.431533	4.3635	3.41739	1.37865	-2.03874	19.87
ENSMUST00000160505	C1s	protein_coding	1.10352	0.269749	-0.439657	0.222737	3.1909	3.46104	3.42545	2.37709	2.74316	0.0671663	3.01331	0.044009	2.97771	0.0460672	2.15435	0.404893	3.01331	2.15435	2.37709	-0.439657	19.61
ENSMUST00000173533	Ptger3	protein_coding	-0.994144	0.342008	0.632602	0.710034	1.90058	1.67532	2.91275	6.2078	1.7544	0.250935	1.52914	0.329092	2.76656	0.050276	5.49776	0.0139325	5.49776	1.52914	1.67532	-0.994144	19.52
ENSMUST00000069782	9030617O03Rik	protein_coding	-0.643147	1.10804	-1.60136	-0.354007	3.53169	2.44136	2.60478	2.06338	3.47261	0.0206902	2.38227	0.122158	2.5457	0.0956681	2.41739	0.34691	3.47261	2.38227	2.06338	-1.60136	18.77
ENSMUST00000025800	Pip5k1b	protein_coding	0.716412	0.052564	2.21763	0.00555245	3.50423	2.97084	3.30137	2.42294	2.21508	0.0460217	1.6817	0.134477	2.01223	0.0698244	2.41739	0.219763	2.41739	1.6817	2.42294	0.00555245	18.52
ENSMUST00000145491	Podn	protein_coding	1.67328	-1.03497	1.71506	0.725378	2.94508	4.13124	3.12074	3.36516	1.73084	0.166836	2.91701	0.02152	1.9065	0.127655	2.63978	0.213587	2.91701	1.73084	2.94508	-1.03497	18.46
ENSMUST00000121240	Gm14425	pseudogene	4.38138	4.71754	3.8382	0.500599	6.90616	5.83512	6.22269	3.65495	2.54969	0.024877	1.47865	0.199066	1.86621	0.10265	3.15435	0.225292	3.15435	1.47865	3.65495	0.500599	18.15
ENSMUST00000025719	Mlana	protein_coding	0.76575	2.51694	3.61489	0.469927	6.94059	4.85025	4.85321	3.10971	4.22723	0.00845096	2.13689	0.176167	2.13985	0.174035	2.63978	0.487563	4.22723	2.13689	3.10971	0.469927	17.95
ENSMUST00000151737	Fbxo36	protein_coding	1.6202	0.634428	-0.659941	-0.997546	4.14054	2.84221	4.15626	2.29431	3.3306	0.0452268	2.03227	0.225388	3.34632	0.0437434	3.29186	0.355817	3.34632	2.03227	2.29431	-0.997546	17.5
ENSMUST00000033465	Vgll1	protein_coding	-1.11317	-1.36198	-1.07139	-1.40899	2.55917	3.61519	2.69419	1.74536	3.73576	0.100051	4.79178	0.0356999	3.87078	0.0873885	3.15435	0.514585	4.79178	3.15435	1.74536	-1.40899	17.47
ENSMUST00000072631	Nkx2-9	protein_coding	-0.264283	0.486906	1.7775	-0.560106	2.82309	5.27965	3.19515	3.27232	1.90665	0.274104	4.36321	0.0116323	2.27871	0.186475	3.83243	0.277254	4.36321	1.90665	2.82309	-0.560106	17.42
ENSMUST00000115179	Rhox2d	protein_coding	0.43916	1.19035	0.480943	0.143338	5.88409	3.98309	3.02412	4.83374	5.13747	0.0176763	3.23648	0.13177	2.27751	0.295508	4.69041	0.269301	5.13747	2.27751	3.02412	0.143338	17.19
ENSMUST00000068340	AV320801	protein_coding	-1.81336	-2.06218	-1.77158	-2.10919	2.85897	2.66346	1.18664	1.53059	4.73576	0.0480233	4.54024	0.057329	3.06342	0.195523	3.63978	0.467387	4.73576	3.06342	1.18664	-2.10919	16.58
ENSMUST00000033585	Pgk2	protein_coding	-0.598505	-0.847316	-0.556722	-0.894328	1.07383	2.80793	4.89335	3.58195	1.73576	0.470241	3.46985	0.124678	5.55527	0.015084	4.47628	0.316749	5.55527	1.73576	1.07383	-0.894328	16.36
ENSMUST00000118305	4930550L24Rik	protein_coding	-0.677891	-0.926702	-0.636108	-0.973714	3.65741	2.40661	3.90707	2.85871	4.39872	0.0675354	3.14792	0.188188	4.64838	0.0537738	3.83243	0.445908	4.64838	3.14792	2.40661	-0.973714	16.19
ENSMUST00000150623	Gm15286	processed_transcript	1.50388	1.25507	0.545666	0.208061	4.39861	4.04782	4.08885	5.46675	3.24318	0.100621	2.89238	0.144396	2.93341	0.137233	5.25869	0.177944	5.25869	2.89238	4.04782	0.208061	15.89
ENSMUST00000137351	Gm13261	lincRNA	3.63349	1.38468	0.0903112	-0.247294	5.38383	5.26231	4.95542	1.17009	2.96104	0.0594746	2.83952	0.0702211	2.53262	0.104016	1.41739	0.851106	2.96104	1.41739	1.17009	-0.247294	15.81
ENSMUST00000044804	Cdsn	protein_coding	-1.34865	0.724468	-1.30687	-0.0595094	1.73872	1.54321	2.89928	5.00813	2.03141	0.27469	1.83589	0.328045	3.19196	0.0749437	5.06764	0.101968	5.06764	1.83589	1.54321	-1.34865	14.56
ENSMUST00000075792	Gm14511	protein_coding	0.307592	1.64374	0.349375	2.01177	5.52425	2.71402	3.11495	5.39878	4.61444	0.021258	1.80421	0.387395	2.20513	0.280164	3.38701	0.314145	4.61444	1.80421	2.71402	0.307592	14.46
ENSMUST00000116553	Tmprss11f	protein_coding	0.225838	-0.0229726	0.852584	-0.485022	2.48314	3.63227	2.47377	2.15476	2.08282	0.20234	3.23195	0.0523803	2.07345	0.202805	2.63978	0.395227	3.23195	2.07345	2.15476	-0.485022	14.14
ENSMUST00000023587	Fetub	protein_coding	-0.574734	1.17646	2.05201	-0.870556	2.97207	3.67969	3.33216	4.96187	1.7336	0.301693	2.44122	0.149687	2.09368	0.213368	5.83243	0.0978579	5.83243	1.7336	2.97207	-0.870556	13.93
ENSMUST00000069209	4930502E18Rik	protein_coding	1.88544	1.63662	1.19025	-0.732315	3.35132	4.23297	3.73343	1.10011	1.75265	0.257667	2.6343	0.087898	2.13476	0.166076	1.83243	0.706321	2.6343	1.75265	1.10011	-0.732315	11.86
ENSMUST00000177526	Gm13147	pseudogene	2.42988	0.596109	2.47167	1.5491	4.32461	3.92942	4.65227	3.62945	2.27185	0.176398	1.87666	0.256538	2.59952	0.124522	2.08035	0.520755	2.59952	1.87666	3.62945	0.596109	11.66
ENSMUST00000048382	1600014K23Rik	protein_coding	0.33504	0.0862294	0.376823	0.0392178	2.74434	3.58947	2.92	5.75429	2.47272	0.300326	3.31785	0.160253	2.64838	0.263094	5.71507	0.233408	5.71507	2.47272	2.74434	0.0392178	11.65
ENSMUST00000062560	Lgsn	protein_coding	0.177678	-1.07113	-0.780539	-1.11814	2.43498	2.96262	2.63711	3.17371	2.88956	0.230455	3.41721	0.161603	3.0917	0.200424	4.29186	0.433171	4.29186	2.88956	2.43498	-1.11814	11.47
ENSMUST00000120757	Slc5a4b	protein_coding	2.48669	-0.849581	0.441013	-0.896593	2.80853	2.80566	3.35343	2.79381	1.48326	0.31194	1.48039	0.312695	2.02815	0.179219	3.69041	0.230429	3.69041	1.48039	2.79381	-0.896593	11.03
ENSMUST00000114928	Gm595	protein_coding	-0.999648	-1.24846	-0.957865	-1.29547	1.08773	2.99175	2.70079	2.44385	2.1508	0.404975	4.05482	0.135222	3.76386	0.1615	3.73932	0.54778	4.05482	2.1508	1.08773	-1.29547	10.66
ENSMUST00000062917	Iqcf3	protein_coding	-0.0843207	-0.333131	-0.0425376	-0.380143	4.17298	3.00018	1.91568	3.35917	4.32072	0.118199	3.14792	0.239898	2.06342	0.422078	3.73932	0.555684	4.32072	2.06342	1.91568	-0.380143	10.03
ENSMUST00000115191	Rhox2b	protein_coding	0.402402	0.153591	0.444185	0.106579	3.48978	4.57437	2.98736	2.26093	3.1508	0.252299	4.23539	0.137705	2.64838	0.324627	2.15435	0.798866	4.23539	2.15435	2.26093	0.106579	9.42
ENSMUST00000061569	BC034902	protein_coding	-1.13896	0.612229	-1.09718	-1.43478	2.27034	3.98994	1.66839	2.85707	2.56244	0.329346	4.28204	0.139217	1.9605	0.426727	4.29186	0.540538	4.29186	1.9605	1.66839	-1.43478	9.1
ENSMUST00000118609	Gm13223	pseudogene	0.494181	0.24537	0.535964	0.198359	3.16652	3.74861	2.07914	5.16007	2.73576	0.2944	3.31785	0.209359	1.64838	0.509731	4.96171	0.402921	4.96171	1.64838	2.07914	0.198359	8.74
ENSMUST00000041998	4930591A17Rik	protein_coding	0.517577	0.268766	0.55936	0.221754	3.77488	2.18704	4.32493	3.75462	3.32072	0.23685	1.73289	0.500811	3.87078	0.175693	3.53287	0.614787	3.87078	1.73289	2.18704	0.221754	8.71
ENSMUST00000121160	C530008M17Rik	protein_coding	5.88266	5.77877	5.68647	6.07968	3.37012	3.9064	4.30511	2.34291	-2.41474	8.6e-07	-1.87845	6.43e-05	-1.47975	0.00114666	-3.73677	4.92e-11	-1.47975	-3.73677	2.34291	5.68647	108.249
ENSMUST00000111416	Ildr2	protein_coding	3.59846	3.72231	2.15786	2.3475	0.437911	-0.301925	1.02861	-1.84983	-2.87311	0.000359209	-3.61294	3.42e-05	-2.28241	0.0024261	-4.19732	8.22e-05	-2.28241	-4.19732	-1.84983	2.15786	67.2854
ENSMUST00000029964	Epha7	protein_coding	4.32104	4.04951	4.07707	4.05864	1.40841	1.9905	0.128391	-0.557398	-2.74605	0.00139451	-2.16396	0.00831606	-4.02607	2.73e-05	-4.61603	1.02e-05	-2.16396	-4.61603	-0.557398	4.04951	66.733
ENSMUST00000054562	Nkx1-2	protein_coding	4.03765	5.76027	5.33775	4.29823	2.97617	2.97329	2.45269	0.901833	-2.23415	0.00377289	-2.23702	0.00373062	-2.75762	0.000601286	-3.39639	0.000412139	-2.23415	-3.39639	0.901833	4.03765	52.7634
ENSMUST00000140974	Hmha1	protein_coding	5.28998	5.3091	5.48082	5.60827	2.63711	3.53236	3.17777	1.71437	-2.72544	0.00831587	-1.83019	0.060931	-2.18478	0.0279316	-3.89389	0.00077101	-1.83019	-3.89389	1.71437	5.28998	36.6668
ENSMUST00000125704	2010107G23Rik	protein_coding	6.03312	4.55754	5.48337	6.88075	3.79857	2.65819	3.64408	3.87583	-1.68009	0.0977023	-2.82046	0.00969199	-1.83458	0.0714425	-3.00492	0.00566725	-1.68009	-3.00492	2.65819	4.55754	29.5484
ENSMUST00000068351	Lrtm2	protein_coding	4.24244	3.70634	4.36222	2.94661	0.159885	2.47894	2.39444	1.41647	-3.97071	0.00274819	-1.65165	0.138506	-1.73615	0.119226	-1.53014	0.218715	-1.53014	-3.97071	0.159885	2.94661	23.0407
ENSMUST00000017604	Cyba	protein_coding	6.34061	5.90624	4.52441	7.36671	2.89193	3.15209	3.48262	4.41154	-2.88092	0.0577518	-2.62075	0.0778527	-2.29022	0.112115	-2.95517	0.0437588	-2.29022	-2.95517	2.89193	4.52441	21.4437
ENSMUST00000055211	Lrrc3b	protein_coding	4.70128	6.3987	5.19286	6.20777	2.60102	3.82055	3.43119	2.05025	-3.01333	0.0656429	-1.79381	0.240015	-2.18317	0.158099	-4.15752	0.0199969	-1.79381	-4.15752	2.05025	4.70128	19.8146
ENSMUST00000094340	Mkrn3	protein_coding	4.11551	3.93382	3.08691	3.81969	2.27	-1.1923	0.723196	-1.7402	-1.50656	0.438354	-4.96886	0.0417881	-3.05337	0.133331	-5.55989	0.0263773	-1.50656	-5.55989	-1.7402	3.08691	19.3001
ENSMUST00000069538	9330182L06Rik	protein_coding	2.24156	2.72971	1.35046	1.80135	-2.06338	-0.481292	-2.15076	-2.61415	-4.27671	0.0767518	-2.69461	0.192742	-4.36408	0.0699785	-4.4155	0.079678	-2.69461	-4.4155	-2.61415	1.35046	18.8058
ENSMUST00000033783	Tceal6	protein_coding	5.592	4.31462	4.81933	4.90915	2.00694	2.326	2.2415	2.7781	-2.99856	0.0724694	-2.6795	0.0999734	-2.76401	0.089507	-2.13105	0.182019	-2.13105	-2.99856	2.00694	4.31462	18.0891
ENSMUST00000141703	Lyrm7	protein_coding	4.06597	2.37659	3.61471	4.56662	1.71277	-1.09745	1.98797	-1.64535	-1.79784	0.413315	-4.60807	0.0777873	-1.52264	0.493016	-6.21197	0.0179321	-1.52264	-6.21197	-1.64535	2.37659	16.3314
ENSMUST00000123784	Gm11629	processed_transcript	3.45978	4.5329	6.20201	8.93215	1.54716	2.54429	2.45978	4.45582	-3.61971	0.164768	-2.62258	0.270267	-2.70708	0.251638	-4.47633	0.0278672	-2.62258	-4.47633	1.54716	3.45978	16.1433
ENSMUST00000046755	Cobl	protein_coding	6.08186	4.09208	5.18237	5.83321	3.06569	3.69287	3.65209	3.87749	-2.26943	0.0762417	-1.64225	0.192609	-1.68303	0.181717	-1.95572	0.134232	-1.64225	-2.26943	3.06569	4.09208	15.8689
ENSMUST00000151779	Ntng2	protein_coding	3.19468	2.8584	2.60843	6.01106	-0.805412	0.191718	1.42914	-1.35618	-3.7127	0.215262	-2.71557	0.324713	-1.47815	0.591902	-7.36725	0.0124546	-1.47815	-7.36725	-1.35618	2.60843	15.1416
ENSMUST00000044216	Shd	protein_coding	4.03159	4.36774	3.81034	4.00878	1.534	0.531129	-0.553374	-0.016771	-2.55427	0.299196	-3.55714	0.174896	-4.64164	0.105537	-4.02556	0.128563	-2.55427	-4.64164	-0.553374	3.81034	14.5005
ENSMUST00000030862	2610109H07Rik	protein_coding	4.17059	2.20094	2.544	4.02839	-0.217766	1.77936	1.15429	0.931903	-3.46256	0.0749283	-1.46543	0.422028	-2.0905	0.246101	-3.09649	0.0912519	-1.46543	-3.46256	-0.217766	2.20094	14.5001
ENSMUST00000179089	AC102654.1	protein_coding	4.24617	2.82743	4.57746	5.51739	1.16362	2.57579	1.81321	2.72833	-2.89385	0.118171	-1.48168	0.400484	-2.24425	0.20249	-2.78906	0.0918024	-1.48168	-2.89385	1.16362	2.82743	14.0718
ENSMUST00000136783	Prnd	protein_coding	3.17837	2.92956	3.44964	3.15385	0.407767	1.21225	0.642321	0.178925	-2.79372	0.150203	-1.98924	0.286713	-2.55917	0.177862	-2.97493	0.127912	-1.98924	-2.97493	0.178925	2.92956	13.8564
ENSMUST00000017458	Mpp2	protein_coding	5.83869	4.42482	4.37146	4.98686	2.88654	3.12878	2.50371	-0.83416	-2.16377	0.348619	-1.92153	0.40813	-2.5466	0.26919	-5.82102	0.0300047	-1.92153	-5.82102	-0.83416	4.37146	13.5374
ENSMUST00000022697	Fgf17	protein_coding	4.02169	5.4987	3.68496	5.09152	2.21598	0.405754	3.02169	-0.142146	-2.4147	0.323516	-4.22492	0.121718	-1.60898	0.508769	-5.23366	0.0626301	-1.60898	-5.23366	-0.142146	3.68496	13.3617
ENSMUST00000090971	Bcan	protein_coding	3.76198	2.97883	2.41144	2.1613	-1.54297	-1.54584	-1.63034	-2.09374	-4.70055	0.182947	-4.70342	0.182639	-4.78792	0.173894	-4.25504	0.225505	-4.25504	-4.78792	-2.09374	2.1613	13.2751
ENSMUST00000058994	Tram1l1	protein_coding	4.64684	4.45147	3.66114	3.66749	2.17622	2.58839	2.61936	0.777452	-2.13561	0.185757	-1.72344	0.278415	-1.69247	0.28414	-2.89004	0.107847	-1.69247	-2.89004	0.777452	3.66114	12.8946
ENSMUST00000095550	Tmem90a	protein_coding	5.01918	4.25847	3.31773	4.21145	0.424725	2.53733	-0.247611	1.61092	-3.93373	0.140728	-1.82112	0.469666	-4.60606	0.0983352	-2.60053	0.283817	-1.82112	-4.60606	-0.247611	3.31773	12.5909
ENSMUST00000048770	Sh3bgr	protein_coding	3.48592	4.59968	2.72034	5.72259	-0.234065	-0.236935	1.26352	3.85902	-4.0428	0.149514	-4.04567	0.149158	-2.54521	0.294864	-1.86357	0.379942	-1.86357	-4.04567	-0.236935	2.72034	11.9842
ENSMUST00000066991	Adm2	protein_coding	3.92174	3.08796	2.64159	5.41946	0.102219	1.09935	1.01485	-0.448552	-3.21481	0.338277	-2.21768	0.486419	-2.30218	0.462841	-5.86801	0.0546507	-2.21768	-5.86801	-0.448552	2.64159	10.9635
ENSMUST00000020878	Efcab10	protein_coding	4.81697	3.72016	3.85875	6.28196	0.734418	1.73155	0.647044	0.183647	-3.48472	0.356613	-2.48759	0.490259	-3.5721	0.340351	-6.09831	0.0763742	-2.48759	-6.09831	0.183647	3.72016	10.7876
ENSMUST00000039026	Apln	protein_coding	5.87734	8.21895	5.44838	6.90345	5.2997	4.11712	5.41791	4.38078	-1.76064	0.407177	-2.94322	0.177591	-1.64243	0.437617	-2.52267	0.253598	-1.64243	-2.94322	4.11712	5.44838	9.65039
ENSMUST00000135754	Pi16	protein_coding	1.32936	1.2732	2.47068	2.31365	-1.39062	0.191471	0.106968	-1.94139	-3.19425	0.313315	-1.61216	0.601801	-1.69666	0.572687	-4.25504	0.147452	-1.61216	-4.25504	-1.94139	1.2732	8.28008
ENSMUST00000058777	Gm6484	protein_coding	3.45895	3.49964	4.65273	5.03759	2.37639	1.37352	0.28902	2.41059	-1.60733	0.612877	-2.6102	0.394532	-3.6947	0.257022	-2.62701	0.299824	-1.60733	-3.6947	0.28902	3.45895	7.96559
ENSMUST00000113886	Gm11131	lincRNA	2.01485	1.98843	1.79359	1.59349	-1.48274	-0.485614	-0.570117	-2.03351	-3.41835	0.332374	-2.42122	0.46741	-2.50573	0.445963	-3.62701	0.289282	-2.42122	-3.62701	-2.03351	1.59349	7.81983
ENSMUST00000013931	Ehmt2 (G9a)	protein_coding	6.78603	6.8564	7.32303	8.60252	5.56855	5.46007	5.06047	6.80561	-1.44026	2.18e-05	-1.54874	5.9e-06	-1.94834	2.99e-08	-1.79691	1.26e-06	-1.44026	-1.94834	5.06047	6.78603	107.368
