# Supplementary material for: Chromatin dynamics and the role of G9a in gene regulation and enhancer silencing during early mouse development
Source: eLife. 2015 Nov 9;4:e09571. doi: 10.7554/eLife.09571 (PMC4729692; doi:10.7554/eLife.09571)
Supplement: Figure 2—source data 2. — EASE: Expression Analysis Systematic Explorer; GO: gene ontology. DOI: http://dx.doi.org/10.7554/eLife.09571.006 [file elife-09571-fig2-data2.xls]

## Sheet: G9a GO term
	Figure 2-source data 2. List of enriched GO terms in genes upregulated in E6.25 G9a-/- epiblast GO term enrichment for biological processes was calculated using DAVID software with minimum 5 genes in a category and EASE p-value<0.05.
	Term	Gene Count	% of Query	P-Value
	regulation of mononuclear cell proliferation	5	3.7	0.00045
	regulation of lymphocyte proliferation	5	3.7	0.00045
	regulation of leukocyte proliferation	5	3.7	0.00049
	sexual reproduction	8	5.9	0.0016
	positive regulation of immune system process	6	4.4	0.0023
	negative regulation of cell proliferation	6	4.4	0.0033
	regulation of lymphocyte activation	5	3.7	0.004
	regulation of leukocyte activation	5	3.7	0.005
	regulation of cell activation	5	3.7	0.0053
	regulation of transcription	19	14.1	0.0074
	reproductive cellular process	5	3.7	0.0075
	regulation of cell proliferation	8	5.9	0.01
	regulation of transcription, DNA-dependent	14	10.4	0.012
	regulation of RNA metabolic process	14	10.4	0.013
	gamete generation	6	4.4	0.016
	regulation of transcription from RNA polymerase II promoter	8	5.9	0.02
	positive regulation of cell death	5	3.7	0.026
	reproductive developmental process	5	3.7	0.031
	multicellular organism reproduction	6	4.4	0.036
	reproductive process in a multicellular organism	6	4.4	0.036
	cell motility	5	3.7	0.039
	localization of cell	5	3.7	0.039
