# Supplementary material for: Chromatin dynamics and the role of G9a in gene regulation and enhancer silencing during early mouse development
Source: eLife. 2015 Nov 9;4:e09571. doi: 10.7554/eLife.09571 (PMC4729692; doi:10.7554/eLife.09571)
Supplement: Figure 2—source data 3. — Differentially expressed genes were identified using a minimum Log2(FC)>1.4 and maximum Fisher combined test of p-value<0.05. In the upregulated sample, expression was 1<log(RPKM). RNA-seq: RNA sequencing; RPKM: Reads Per Kilobase of transcript per Million mapped reads; FC: fold change. DOI: http://dx.doi.org/10.7554/eLife.09571.007 [file elife-09571-fig2-data3.xlsx]

## Sheet: Ezh2KO
		Figure 2-source data 3. List of differentially expressed genes in E6.25 Ezh2-/- epiblast from RNA-seq Analysis Data is based on 3 individual Ezh2-/- epiblasts and 3 individual control (Ezh2+/+ or Ezh2+/-) epiblasts. Differentially expressed genes were identified using a minimum log2(fold change)>1.4 and maximum Fisher combined test of p-value<0.05. In the upregulated sample expression was 1<log(R…
transcript.ID	gene.name	biotype	Ezh2.cntr.1	Ezh2.cntr.2	Ezh2.cntr.3	Ezh2.KO.1	Ezh2.KO.2	Ezh2.KO.3	Ezh2.KO.1.vs.cntr.log2FC	Ezh2.KO.vs.1.cntr.pvalue	Ezh2.KO.2.vs.cntr.log2FC	Ezh2.KO.vs.2.cntr.pvalue	Ezh2.KO.3.vs.cntr.log2FC	Ezh2.KO.vs.3.cntr.pvalue	Maximum FC	Minimum FC	Minimum KO	Minimum Cntr	X2
ENSMUST00000034830	Crabp1	protein_coding	7.00756	6.70403	6.48746	8.88087	8.88713	8.61248	2.13197	2.9e-06	2.13823	2.65e-06	1.86358	4.93e-05	2.13823	1.86358	8.61248	6.48746	71.0187
ENSMUST00000000188	Ccnd2	protein_coding	6.29469	6.16688	4.59355	8.34003	8.16363	8.03675	2.47794	1.42e-07	2.30155	1.09e-06	2.17467	4.3e-06	2.47794	2.17467	8.03675	4.59355	83.7073
ENSMUST00000041105	Sfmbt2	protein_coding	4.23607	5.44883	1.9122	7.99885	8.16886	7.3998	3.53318	7.78e-67	3.70319	1.41e-73	2.93412	9.93e-46	3.70319	2.93412	7.3998	1.9122	847.18
ENSMUST00000085797	Lefty2	protein_coding	5.55318	4.84239	5.81145	6.97875	7.71334	7.52818	1.52148	5.63e-05	2.25608	8.12e-10	2.07092	2.05e-08	2.25608	1.52148	6.97875	4.84239	96.8384
ENSMUST00000117544	AU022751	protein_coding	2.81271	5.22136	2.85449	6.9175	6.79943	6.83851	2.81414	2.21e-06	2.69606	5.93e-06	2.73515	4.27e-06	2.81414	2.69606	6.79943	2.81271	74.8438
ENSMUST00000009772	Tex15	protein_coding	4.44734	4.975	5.69151	6.62385	6.7016	7.07741	1.49532	0.00381954	1.57306	0.00230037	1.94887	0.000143419	1.94887	1.49532	6.62385	4.44734	40.9841
ENSMUST00000065527	Raet1c	protein_coding	5.6088	4.52806	3.93069	6.47258	6.57632	6.81194	1.6126	0.0255576	1.71633	0.0170299	1.95196	0.00631053	1.95196	1.6126	6.47258	3.93069	25.6103
ENSMUST00000002013	Spa17	protein_coding	4.49814	4.9649	4.53993	6.66331	6.38623	6.5894	1.97977	0.0333889	1.70269	0.0684349	1.90586	0.0405526	1.97977	1.70269	6.38623	4.49814	18.5731
ENSMUST00000054562	Nkx1-2	protein_coding	1.89609	4.19076	3.93787	6.33019	6.68958	7.41174	2.69368	2.65e-06	3.05308	8.69e-08	3.77523	3.26e-11	3.77523	2.69368	6.33019	1.89609	106.492
ENSMUST00000174854	H2-Q5	pseudogene	4.89166	4.13357	4.50281	6.14917	6.61923	7.25692	1.60674	0.042514	2.0768	0.00791054	2.71448	0.000447769	2.71448	1.60674	6.14917	4.13357	31.4174
ENSMUST00000161074	Hint3	protein_coding	4.43123	5.01381	3.70748	6.00026	6.06618	5.98862	1.52031	0.0375738	1.58623	0.0291261	1.50867	0.0385536	1.58623	1.50867	5.98862	3.70748	20.1465
ENSMUST00000031003	Ppp2r2c	protein_coding	5.06884	4.04771	3.01441	6.03907	5.87007	6.23896	1.76152	1.29e-06	1.59252	1.39e-05	1.96142	4.93e-08	1.96142	1.59252	5.87007	3.01441	83.1397
ENSMUST00000114474	1600029D21Rik	protein_coding	3.6539	4.71403	3.00381	6.83475	5.81407	6.02618	2.86959	5.62e-12	1.84891	2.52e-05	2.06102	1.88e-06	2.86959	1.84891	5.81407	3.00381	99.3552
ENSMUST00000075144	Nrp2	protein_coding	3.87292	4.36589	4.51579	6.14978	5.68664	5.84145	1.87313	2.88e-06	1.40999	0.000521423	1.5648	0.000107494	1.87313	1.40999	5.68664	3.87292	58.9095
ENSMUST00000110378	Snx25	protein_coding	4.03876	4.5218	3.05197	5.89193	5.51376	5.7286	1.90095	0.000764501	1.52278	0.00771373	1.73761	0.00218705	1.90095	1.52278	5.51376	3.05197	36.3325
ENSMUST00000048647	Rbm46	protein_coding	4.30774	3.91889	1.93449	5.39392	5.206	5.15905	1.70268	0.0893767	1.51477	0.130777	1.46781	0.143101	1.70268	1.46781	5.15905	1.93449	12.7867
ENSMUST00000171427	Grm6	protein_coding	3.28009	3.45066	3.5975	5.54968	5.10821	6.20539	2.10112	7.29e-05	1.65965	0.00201458	2.75683	1.19e-07	2.75683	1.65965	5.10821	3.28009	63.3558
ENSMUST00000030489	Tal1	protein_coding	2.39165	-1.9041	4.17759	5.04224	5.5764	5.62147	2.06584	0.00460602	2.6	0.000318176	2.64506	0.000247809	2.64506	2.06584	5.04224	-1.9041	43.4723
ENSMUST00000106085	Ebf1	pseudogene	2.29166	2.31784	2.33344	5.03388	6.81377	6.87993	2.71946	0.171345	4.49935	0.0267702	4.56551	0.0248028	4.56551	2.71946	5.03388	2.29166	18.1627
ENSMUST00000057849	C1ql1	protein_coding	2.39341	4.00456	3.53473	5.02016	5.10817	5.8524	1.56537	0.114827	1.65338	0.0948845	2.39761	0.0144348	2.39761	1.56537	5.02016	2.39341	17.5151
ENSMUST00000066408	1700016K19Rik	protein_coding	4.43465	0.290902	1.89147	5.89147	4.98713	7.02931	2.74531	0.0164253	1.84098	0.11407	3.88316	0.000635831	3.88316	1.84098	4.98713	0.290902	27.2809
ENSMUST00000001872	Hoxd13	protein_coding	3.22425	3.55856	1.45868	5.61519	4.88692	5.79872	2.62264	0.00352489	1.89438	0.0371793	2.80617	0.0017494	2.80617	1.89438	4.88692	1.45868	30.5768
ENSMUST00000111416	Ildr2	protein_coding	2.5263	2.58565	3.66538	4.81425	5.39848	5.6665	1.78735	0.000963526	2.37158	8.74e-06	2.6396	6.66e-07	2.6396	1.78735	4.81425	2.5263	65.629
ENSMUST00000107289	Ptprd	protein_coding	3.12623	3.25933	3.22246	4.7955	5.17904	5.34366	1.59174	0.00141006	1.97528	6.05e-05	2.1399	1.28e-05	2.1399	1.59174	4.7955	3.12623	55.0861
ENSMUST00000163399	8030474K03Rik	protein_coding	3.67801	3.88107	0.196228	4.78119	5.73668	5.43871	1.52423	0.132936	2.47972	0.0134447	2.18175	0.0301028	2.47972	1.52423	4.78119	0.196228	19.6604
ENSMUST00000094245	Cldn3	protein_coding	3.26658	3.00325	2.65628	5.09686	4.77467	5.27512	2.10012	0.0285666	1.77793	0.0664478	2.27839	0.0166509	2.27839	1.77793	4.77467	2.65628	20.7243
ENSMUST00000032827	Hapln3	protein_coding	1.62886	2.65504	3.25561	5.0282	5.68385	4.7432	2.36964	0.00850495	3.02529	0.000606671	2.08464	0.0217014	3.02529	2.08464	4.7432	1.62886	32.01
ENSMUST00000087241	Shisa3	protein_coding	2.75684	2.78302	2.79862	4.87497	4.72436	4.95905	2.09538	0.00821906	1.94477	0.0143981	2.17945	0.00583814	2.17945	1.94477	4.72436	2.75684	28.3706
ENSMUST00000038896	Lcat	protein_coding	2.3099	3.07305	2.93665	4.72092	5.5751	6.74617	1.91148	0.0469123	2.76567	0.00308494	3.93673	2.01e-05	3.93673	1.91148	4.72092	2.3099	39.311
ENSMUST00000019068	Alox15	protein_coding	2.69019	-1.09099	0.509577	5.73197	4.68324	5.20228	4.25567	0.000144312	3.20694	0.00428254	3.72598	0.000863948	4.25567	3.20694	4.68324	-1.09099	42.7015
ENSMUST00000048935	Dmrt3	protein_coding	2.69441	-1.08676	-1.07116	5.7102	4.66193	6.33131	4.40381	6.51e-06	3.35555	0.000674101	5.02493	2.85e-07	5.02493	3.35555	4.66193	-1.08676	68.6302
ENSMUST00000157713	7SK	misc_RNA	3.43622	3.4624	1.89304	5.478	4.62613	4.79567	2.38708	0.270074	1.53521	0.449165	1.70474	0.408563	2.38708	1.53521	4.62613	1.89304	6.00907
ENSMUST00000049089	Twist1	protein_coding	3.62214	3.38529	-0.506	4.7794	4.58966	4.85606	1.81184	0.168723	1.6221	0.215711	1.8885	0.151442	1.8885	1.6221	4.58966	-0.506	10.4017
ENSMUST00000044705	Vstm2b	protein_coding	2.41416	1.21795	2.97052	5.0409	5.43231	4.55122	2.67219	0.027698	3.0636	0.0112858	2.1825	0.0734948	3.0636	2.1825	4.55122	1.21795	21.3623
ENSMUST00000062821	Emid1	protein_coding	3.28022	2.80391	0.819508	5.23455	5.22637	4.52949	2.61293	0.00731603	2.60476	0.00745408	1.90788	0.053753	2.61293	1.90788	4.52949	0.819508	25.4801
ENSMUST00000036917	Hand1	protein_coding	3.91578	-0.758478	2.25712	5.88648	5.8833	4.5173	3.11641	2.69e-05	3.11324	2.69e-05	1.74724	0.0253378	3.11641	1.74724	4.5173	-0.758478	49.4445
ENSMUST00000113718	Tex11	protein_coding	2.53077	1.63941	3.23998	5.03968	5.85377	4.517	2.42756	0.00237813	3.24166	4.07e-05	1.90489	0.0183945	3.24166	1.90489	4.517	1.63941	40.2928
ENSMUST00000078434	Ppp3cc	protein_coding	4.27873	-0.782549	1.55498	4.84776	4.51634	5.22315	1.91358	0.0692215	1.58216	0.134681	2.28896	0.0286375	2.28896	1.58216	4.51634	-0.782549	16.4567
ENSMUST00000029252	Lrrc34	protein_coding	2.55405	3.06566	1.85887	5.0288	4.6915	4.46194	2.45408	0.0216015	2.11679	0.0484644	1.88723	0.0796354	2.45408	1.88723	4.46194	1.85887	18.7844
ENSMUST00000146366	Gm5602	lincRNA	0.92294	1.94912	1.37976	4.54969	5.08686	4.45232	3.07121	0.020297	3.60839	0.00620591	2.97384	0.0245813	3.60839	2.97384	4.45232	0.92294	25.3706
ENSMUST00000091403	Arsb	protein_coding	2.54204	3.0828	2.27897	4.93298	4.43918	5.05992	2.25866	0.00502476	1.76487	0.0299239	2.38561	0.00295581	2.38561	1.76487	4.43918	2.27897	29.2529
ENSMUST00000095105	1700055D18Rik	protein_coding	-0.506988	4.04276	0.534795	4.62226	5.548	4.34432	1.98738	0.0843977	2.91312	0.0105828	1.70944	0.138216	2.91312	1.70944	4.34432	-0.506988	17.9994
ENSMUST00000020575	Fstl3	protein_coding	3.26685	2.01292	2.22117	4.80613	5.68606	4.33325	2.19542	0.0189902	3.07536	0.000807641	1.72254	0.0693361	3.07536	1.72254	4.33325	2.01292	27.508
ENSMUST00000037419	Pramel1	protein_coding	2.66259	2.8587	-1.29562	4.91383	4.33055	4.53774	2.69219	0.00167289	2.10892	0.0153398	2.31611	0.00733964	2.69219	2.10892	4.33055	-1.29562	30.9699
ENSMUST00000018614	Kcnab3	protein_coding	2.26658	3.53377	-1.15107	5.18878	4.32926	4.6342	2.6996	0.00362853	1.84008	0.0513213	2.14502	0.0220457	2.6996	1.84008	4.32926	-1.15107	24.8064
ENSMUST00000009740	Taf7l	protein_coding	2.66118	3.39786	1.8285	5.22081	4.52683	4.27545	2.45404	0.0412484	1.76005	0.142695	1.50867	0.20773	2.45404	1.50867	4.27545	1.8285	13.4134
ENSMUST00000071889	Car12	protein_coding	3.16027	3.08692	1.99561	4.24936	4.68034	6.40237	1.41313	0.053891	1.8441	0.0105082	3.56613	3.51e-07	3.56613	1.41313	4.24936	1.99561	44.6777
ENSMUST00000171877	Pdzk1ip1	protein_coding	3.29486	1.99911	0.0147152	4.8727	4.79844	4.23927	2.568	0.124375	2.49374	0.134837	1.93457	0.240186	2.568	1.93457	4.23927	0.0147152	11.029
ENSMUST00000103006	Nudt10	protein_coding	3.12402	2.1502	2.52837	4.64385	4.23838	4.431	1.9865	0.091509	1.58103	0.179549	1.77365	0.13179	1.9865	1.58103	4.23838	2.1502	12.2703
ENSMUST00000034227	Pllp	protein_coding	3.62061	1.5764	1.85504	4.55548	4.19582	4.72729	1.90012	0.115788	1.54046	0.201709	2.07194	0.0857724	2.07194	1.54046	4.19582	1.5764	12.426
ENSMUST00000047511	4930506M07Rik	protein_coding	3.20742	1.31606	2.33166	4.60468	4.35427	4.17289	2.12264	0.0124831	1.87222	0.0282748	1.69085	0.048488	2.12264	1.69085	4.17289	1.31606	21.9512
ENSMUST00000050029	Six1	protein_coding	-1.30991	2.13131	-0.531165	4.15813	4.6947	4.18909	3.28985	3.14e-06	3.82641	4.95e-08	3.3208	2.45e-06	3.82641	3.28985	4.15813	-1.30991	84.824
ENSMUST00000162836	Gm7420	pseudogene	0.385834	1.99698	1.42762	4.12806	4.26025	4.1376	2.71514	0.346594	2.84733	0.331221	2.72468	0.345045	2.84733	2.71514	4.12806	0.385834	6.45731
ENSMUST00000171970	Bmp6	protein_coding	1.46298	3.15213	-1.0802	4.56366	6.19427	4.03189	2.54937	0.0169542	4.17999	8.17e-05	2.0176	0.061087	4.17999	2.0176	4.03189	-1.0802	32.5703
ENSMUST00000041544	Fbln2	protein_coding	2.3489	1.91566	2.39069	4.01872	4.04682	4.7287	1.7849	0.0608585	1.813	0.0565793	2.49489	0.00823559	2.49489	1.7849	4.01872	1.91566	20.9412
ENSMUST00000119011	Gm12710	pseudogene	2.36045	2.38663	2.40223	3.98719	5.7874	6.11222	1.60399	0.52007	3.4042	0.203219	3.72901	0.167219	3.72901	1.60399	3.98719	2.36045	8.07142
ENSMUST00000096030	Klrg2	protein_coding	1.54069	-0.018095	-0.00249411	4.28291	3.96764	3.9876	3.57652	0.000645213	3.26125	0.00204412	3.28121	0.00189419	3.57652	3.26125	3.96764	-0.018095	39.6154
ENSMUST00000032451	Slc6a11	protein_coding	3.25351	2.23787	-0.249031	4.45141	4.96211	3.95128	2.12035	0.0810147	2.63105	0.030838	1.62022	0.17954	2.63105	1.62022	3.95128	-0.249031	15.419
ENSMUST00000178678	Sncaip	protein_coding	2.49859	3.0842	0.614372	4.42173	3.91862	4.90932	2.0374	0.0252462	1.5343	0.0949535	2.52499	0.00513779	2.52499	1.5343	3.91862	0.614372	22.6092
ENSMUST00000062723	Acpp	protein_coding	0.789292	2.8661	1.72416	4.63843	3.8802	5.19314	2.60011	2.86e-07	1.84188	0.000496926	3.15482	1.68e-10	3.15482	1.84188	3.8802	0.789292	90.3628
ENSMUST00000025144	Cyp4f41-ps	pseudogene	1.59689	2.62307	2.37564	3.86106	5.06691	3.86323	1.60052	0.252602	2.80637	0.0415182	1.60269	0.250014	2.80637	1.60052	3.86106	1.59689	11.8876
ENSMUST00000031840	Gpnmb	protein_coding	3.57935	0.247984	0.263585	3.84855	4.07197	3.86665	1.59139	0.228019	1.81481	0.171836	1.6095	0.222759	1.81481	1.59139	3.84855	0.247984	9.48241
ENSMUST00000076700	Ikzf1	protein_coding	2.1692	2.75726	1.72556	4.34223	3.8105	4.52865	2.06266	0.0171673	1.53093	0.0794186	2.24909	0.00909628	2.24909	1.53093	3.8105	1.72556	22.5953
ENSMUST00000028232	Phf19	protein_coding	-0.169808	2.1783	-0.712987	4.87198	3.79772	4.09653	3.86592	4.34e-06	2.79166	0.001198	3.09048	0.000292194	3.86592	2.79166	3.79772	-0.712987	54.4257
ENSMUST00000078626	Trank1	protein_coding	1.21038	1.68402	1.92202	4.17644	4.80062	3.7934	2.54157	6.77e-05	3.16576	5.46e-07	2.15853	0.000788296	3.16576	2.15853	3.7934	1.21038	62.3334
ENSMUST00000124606	Gm11549	lincRNA	2.10251	2.47661	1.26982	4.29957	3.78052	4.49438	2.26726	0.0322364	1.74822	0.101445	2.46207	0.0195279	2.46207	1.74822	3.78052	1.26982	19.3176
ENSMUST00000129783	Best4-ps	pseudogene	-0.312371	2.03574	3.18884	4.72941	3.74261	4.02436	2.5045	0.0250603	1.51771	0.187717	1.79945	0.114173	2.5045	1.51771	3.74261	-0.312371	15.0587
ENSMUST00000154270	Emp1	protein_coding	3.59829	-0.329722	-1.31412	4.14531	3.61162	3.75843	1.99592	0.229671	1.46222	0.358949	1.60904	0.319631	1.99592	1.46222	3.61162	-1.31412	7.27254
ENSMUST00000121646	Plagl1	protein_coding	2.273	1.36059	1.25066	3.89975	3.57495	4.5765	2.19478	0.00796194	1.86997	0.0249842	2.87153	0.000420458	2.87153	1.86997	3.57495	1.25066	32.5935
ENSMUST00000029462	Tbx15	protein_coding	-1.68821	2.5859	0.353574	5.18646	3.56472	5.32229	3.84696	0.000177661	2.22521	0.03306	3.98279	0.000104141	3.98279	2.22521	3.56472	-1.68821	42.4297
ENSMUST00000179920	AC093451.2	lincRNA	2.05336	2.07954	1.09514	4.00203	3.48031	4.69821	2.19279	0.22067	1.67107	0.342257	2.88896	0.110063	2.88896	1.67107	3.48031	1.09514	9.57996
ENSMUST00000095020	Il1rl2	protein_coding	1.77251	0.213726	2.22933	4.35861	3.477	4.62381	2.73173	0.212097	1.85012	0.359293	2.99693	0.177901	2.99693	1.85012	3.477	0.213726	8.60171
ENSMUST00000121565	AU015836	protein_coding	0.560783	0.586965	0.602566	4.12613	3.92062	3.45939	3.54259	2.64e-05	3.33708	8.42e-05	2.87585	0.000936553	3.54259	2.87585	3.45939	0.560783	53.7955
ENSMUST00000149488	B630019A10Rik	processed_transcript	1.68478	0.488565	1.24113	4.31152	3.42991	3.67981	3.09289	0.0139107	2.21127	0.0828315	2.46118	0.0521757	3.09289	2.21127	3.42991	0.488565	19.4384
ENSMUST00000031238	Gbp9	protein_coding	2.28607	1.77168	1.64978	3.41532	3.61115	3.68992	1.48557	0.170589	1.6814	0.119715	1.76017	0.102971	1.76017	1.48557	3.41532	1.64978	12.3289
ENSMUST00000100749	Cux2	pseudogene	2.42214	1.44832	1.46392	5.37081	3.38966	5.36655	3.51653	0.163786	1.53538	0.502802	3.51227	0.163795	3.51653	1.53538	3.38966	1.44832	8.6118
ENSMUST00000105874	Slc30a2	protein_coding	1.81173	1.32333	0.116543	5.13149	3.36421	3.71961	3.88921	0.000247161	2.12193	0.0517446	2.47733	0.0216866	3.88921	2.12193	3.36421	0.116543	30.1959
ENSMUST00000069742	Prr18	protein_coding	2.07564	1.98635	0.00194788	3.54627	3.73504	3.36401	1.93289	0.103856	2.12167	0.0733282	1.75064	0.140634	2.12167	1.75064	3.36401	0.00194788	13.6783
ENSMUST00000058747	9030224M15Rik	protein_coding	-0.465006	3.14614	0.576777	3.48367	3.50252	3.28676	1.6002	0.311514	1.61905	0.305107	1.4033	0.368315	1.61905	1.4033	3.28676	-0.465006	6.70443
ENSMUST00000025797	Mbl2	protein_coding	0.0119263	1.62307	0.0537093	4.63867	3.30138	3.27827	3.86565	0.0389931	2.52836	0.181491	2.50525	0.185377	3.86565	2.50525	3.27827	0.0119263	13.2726
ENSMUST00000159701	Gm15852	lincRNA	1.27417	1.30035	1.31595	3.31595	3.24169	4.02594	2.01903	0.18496	1.94477	0.202038	2.72901	0.0587341	2.72901	1.94477	3.24169	1.27417	12.2433
ENSMUST00000163271	Mgll	protein_coding	1.60843	1.17518	1.51271	3.23518	4.04726	3.51968	1.79142	0.109362	2.6035	0.0185159	2.07592	0.0619629	2.6035	1.79142	3.23518	1.17518	17.9669
ENSMUST00000000641	Sema4f	protein_coding	0.439048	2.53562	1.48083	4.08964	3.54407	3.23146	2.36062	0.0669942	1.81506	0.156019	1.50244	0.236466	2.36062	1.50244	3.23146	0.439048	12.0058
ENSMUST00000172069	Cyp27b1	protein_coding	-0.140472	2.20764	0.901311	3.22324	4.25332	3.3889	1.92181	0.1595	2.95189	0.0292886	2.08748	0.125033	2.95189	1.92181	3.22324	-0.140472	14.8909
ENSMUST00000115274	Pdgfrb	protein_coding	1.03209	-2.26365	-1.24805	3.60993	3.23228	3.17814	3.77576	0.00730722	3.39811	0.0156702	3.34397	0.0174075	3.77576	3.34397	3.17814	-2.26365	26.2515
ENSMUST00000034927	Zic1	protein_coding	0.656658	0.490195	-0.301559	3.12471	4.6576	4.55527	2.78654	0.0100807	4.31944	5.55e-05	4.2171	8.22e-05	4.31944	2.78654	3.12471	-0.301559	47.6052
ENSMUST00000057169	Emilin3	protein_coding	1.77732	1.34407	0.944631	3.11456	4.88532	3.81689	1.71927	0.14523	3.49003	0.00265601	2.4216	0.037975	3.49003	1.71927	3.11456	0.944631	22.2624
ENSMUST00000049378	Ablim3	protein_coding	1.7774	-0.00376825	2.33376	4.0342	3.1075	3.86866	2.37631	0.0123867	1.44961	0.134171	2.21077	0.0201939	2.37631	1.44961	3.1075	-0.00376825	20.6043
ENSMUST00000121519	Gm13899	pseudogene	2.81632	-0.157498	-0.141897	3.55854	3.10577	4.76073	1.99839	0.231515	1.54562	0.352484	3.20058	0.054818	3.20058	1.54562	3.10577	-0.157498	10.8192
ENSMUST00000072631	Nkx2-9	protein_coding	2.39211	1.41829	-0.151072	3.93639	3.35963	3.07349	2.38017	0.15658	1.80341	0.281237	1.51726	0.362308	2.38017	1.51726	3.07349	-0.151072	8.27602
ENSMUST00000057337	Fgfbp3	protein_coding	1.64104	1.66722	0.945853	3.82032	3.67895	3.07088	2.36593	0.0958949	2.22455	0.117483	1.61648	0.258822	2.36593	1.61648	3.07088	0.945853	11.6752
ENSMUST00000176636	Pou2f3	protein_coding	1.55866	1.43284	-1.72148	3.03341	4.03715	4.46655	2.04576	0.0563201	3.04951	0.00338246	3.47891	0.000775177	3.47891	2.04576	3.03341	-1.72148	31.4565
ENSMUST00000089085	Pde10a	protein_coding	2.52086	0.225118	-0.174319	2.88458	3.45186	4.84379	1.50712	0.0765277	2.0744	0.0129441	3.46633	2.24e-05	3.46633	1.50712	2.88458	-0.174319	35.2473
ENSMUST00000094348	1700084C01Rik	protein_coding	0.354589	0.380771	-0.603628	2.8558	3.40958	3.46893	2.74533	0.0451726	3.2991	0.0120579	3.35845	0.0102937	3.35845	2.74533	2.8558	-0.603628	24.183
ENSMUST00000042286	Fmnl1	protein_coding	2.3944	-0.749347	0.851216	4.19699	2.83585	4.33881	2.84528	0.0157571	1.48413	0.214125	2.98709	0.0111405	2.98709	1.48413	2.83585	-0.749347	20.3777
ENSMUST00000109428	Tox2	protein_coding	1.17299	1.78413	0.951734	2.79973	4.48628	3.056	1.45243	0.214292	3.13898	0.00527625	1.70869	0.139567	3.13898	1.45243	2.79973	0.951734	17.5083
ENSMUST00000001706	Hoxc9	protein_coding	-1.10264	-1.07646	-0.0608555	3.10907	2.77178	4.12718	3.76913	0.0731094	3.43184	0.10208	4.78724	0.024153	4.78724	3.43184	2.77178	-1.10264	17.2423
ENSMUST00000031215	Brdt	protein_coding	2.22417	-0.486618	0.528983	2.75138	3.36161	3.57457	1.56466	0.201714	2.1749	0.0749184	2.38786	0.0502577	2.38786	1.56466	2.75138	-0.486618	14.3657
ENSMUST00000150145	4921531C22Rik	lincRNA	2.02194	-0.759236	0.841327	3.16326	3.35203	2.74396	2.06031	0.126715	2.24908	0.0921219	1.64101	0.230725	2.24908	1.64101	2.74396	-0.759236	11.834
ENSMUST00000160362	Gm2976	pseudogene	1.10864	1.13482	1.15042	2.73539	6.20545	5.57662	1.60399	0.46552	5.07405	0.00302702	4.44522	0.00987006	5.07405	1.60399	2.73539	1.10864	22.3661
ENSMUST00000023259	Lynx1	protein_coding	1.62117	-1.81208	-0.796482	2.72708	4.03615	2.96413	2.33503	0.0840471	3.6441	0.00622259	2.57208	0.055481	3.6441	2.33503	2.72708	-1.81208	20.8953
ENSMUST00000162897	Xkr4	protein_coding	1.0894	0.437508	1.30111	2.71614	5.1122	2.7887	1.72912	0.110585	4.12518	7.75e-05	1.80167	0.0945043	4.12518	1.72912	2.71614	0.437508	28.0526
ENSMUST00000099498	Ccdc80	protein_coding	1.97067	1.10376	-0.103029	3.16999	2.76131	2.67407	1.94766	0.155796	1.53898	0.259024	1.45174	0.285775	1.94766	1.45174	2.67407	-0.103029	8.92519
ENSMUST00000165526	Fgf9	protein_coding	0.783561	0.809743	0.0883783	2.67334	3.75108	3.83231	2.07642	0.147969	3.15417	0.0262159	3.23539	0.0225573	3.23539	2.07642	2.67334	0.0883783	18.6877
ENSMUST00000036109	Fam101a	protein_coding	1.72062	1.00984	0.440479	3.8328	4.27311	2.66504	2.68082	0.148594	3.12114	0.094981	1.51306	0.395009	3.12114	1.51306	2.66504	0.440479	10.3789
ENSMUST00000036060	Isl1	protein_coding	0.400707	2.16385	-1.14247	2.66488	2.95319	3.96961	1.60501	0.339934	1.89332	0.266379	2.90974	0.0967087	2.90974	1.60501	2.66488	-1.14247	9.47578
ENSMUST00000105875	Trim63	protein_coding	0.234428	1.58254	0.861174	3.36367	3.10884	2.63827	2.36658	0.103106	2.11175	0.147387	1.64118	0.266031	2.36658	1.64118	2.63827	0.234428	11.0217
ENSMUST00000088790	Ret	protein_coding	1.73005	-1.11824	1.63433	3.48233	2.63046	4.68264	2.28436	0.00627353	1.43249	0.0946003	3.48467	2.2e-05	3.48467	1.43249	2.63046	-1.11824	36.308
ENSMUST00000073151	Nlrp9b	protein_coding	-0.595262	0.0158825	-1.55348	2.61645	3.32646	4.13051	3.19157	0.0519173	3.90158	0.0164911	4.70564	0.0038948	4.70564	3.19157	2.61645	-1.55348	25.2223
ENSMUST00000143551	6530409C15Rik	protein_coding	-0.508826	1.10232	-0.467043	3.43985	2.62862	2.60551	3.18758	0.112708	2.37635	0.236798	2.35324	0.241059	3.18758	2.35324	2.60551	-0.508826	10.0924
ENSMUST00000119653	Gm16148	pseudogene	0.307742	0.333924	0.349525	2.93449	4.36273	2.57408	2.60399	0.294817	4.03223	0.110609	2.24358	0.362593	4.03223	2.24358	2.57408	0.307742	8.87527
ENSMUST00000143191	Gm14424	lincRNA	1.89109	0.332307	0.347908	3.80734	3.85861	2.57247	2.75055	0.302207	2.80182	0.294697	1.51568	0.503512	2.80182	1.51568	2.57247	0.332307	6.2092
ENSMUST00000141387	Sypl2	protein_coding	-0.302163	2.13906	0.476585	2.54697	3.72425	3.4496	1.40789	0.219017	2.58517	0.0209863	2.31052	0.0398223	2.58517	1.40789	2.54697	-0.302163	17.2116
ENSMUST00000029030	Edn3	protein_coding	-0.494985	-1.4688	0.131761	2.5468	4.58106	4.23079	3.01641	0.041904	5.05067	0.000469907	4.7004	0.00111622	5.05067	3.01641	2.5468	-1.4688	35.2663
ENSMUST00000053986	Lingo3	protein_coding	-0.0508095	1.19777	0.406011	2.49347	4.08664	2.8322	1.88175	0.199422	3.47491	0.0175361	2.22048	0.128705	3.47491	1.88175	2.49347	-0.0508095	15.4121
ENSMUST00000102905	Palm2	protein_coding	0.758144	0.462398	1.06296	3.23289	2.4912	4.31137	2.45094	0.0515772	1.70925	0.181794	3.52942	0.00447901	3.52942	1.70925	2.4912	0.462398	20.1558
ENSMUST00000067935	Vps37d	protein_coding	1.51993	0.546109	0.56171	3.14667	3.73538	2.46434	2.19461	0.149488	2.78331	0.061792	1.51227	0.333725	2.78331	1.51227	2.46434	0.546109	11.5639
ENSMUST00000033189	Cckbr	protein_coding	0.418643	1.44483	0.460426	2.46043	3.12313	4.63607	1.60313	0.325136	2.26584	0.168561	3.77878	0.0239335	3.77878	1.60313	2.46043	0.418643	13.2729
ENSMUST00000057716	1700019N12Rik	protein_coding	0.508729	1.53491	0.550512	5.67979	5.76165	2.45314	4.73241	0.0157052	4.81427	0.0140243	1.50576	0.470614	4.81427	1.50576	2.45314	0.508729	18.3489
ENSMUST00000112357	Lemd1	protein_coding	1.17495	0.201133	0.216734	3.8017	3.72744	2.44129	3.19461	0.166741	3.12035	0.175749	1.8342	0.415664	3.19461	1.8342	2.44129	0.201133	8.81578
ENSMUST00000047443	Mansc1	protein_coding	1.22051	0.509724	-0.059638	3.18829	4.74875	2.42795	2.53643	0.110957	4.09689	0.010096	1.7761	0.266053	4.09689	1.7761	2.42795	-0.059638	16.2366
ENSMUST00000127792	C330018A13Rik	lincRNA	-0.532507	-0.506325	-0.490724	3.09424	3.34191	2.41191	3.60399	0.0636967	3.85166	0.0457487	2.92166	0.141949	3.85166	2.92166	2.41191	-0.532507	15.581
ENSMUST00000129835	Slc2a6	protein_coding	-0.292238	0.733944	1.07147	2.33451	3.58218	2.65218	1.72368	0.3026	2.97135	0.0802881	2.04135	0.223965	2.97135	1.72368	2.33451	-0.292238	10.4275
ENSMUST00000022561	Fam123a	protein_coding	-0.299157	-0.272975	-0.257374	2.32759	2.75583	2.55215	2.60399	0.11511	3.03223	0.0627362	2.82855	0.0838962	3.03223	2.60399	2.32759	-0.299157	14.8177
ENSMUST00000053306	Oxtr	protein_coding	-0.0480737	0.563071	1.57867	2.80106	2.31177	2.4199	1.94465	0.178788	1.45536	0.305875	1.56349	0.273435	1.94465	1.45536	2.31177	-0.0480737	8.40565
ENSMUST00000135944	Pdlim2	protein_coding	-0.252754	-0.226572	-0.210971	2.95895	2.29973	3.64586	3.18895	0.195389	2.52973	0.286428	3.87585	0.126328	3.87585	2.52973	2.29973	-0.252754	9.90381
ENSMUST00000109244	Cdc20b	protein_coding	-0.487548	-0.461366	1.87616	4.46113	2.28733	4.26422	3.69262	0.0622686	1.51883	0.420304	3.49572	0.0763649	3.69262	1.51883	2.28733	-0.487548	12.4306
ENSMUST00000148040	Relb	protein_coding	1.02251	1.04869	0.479326	2.28668	2.99003	2.90552	1.41374	0.318853	2.11709	0.135069	2.03258	0.151281	2.11709	1.41374	2.28668	0.479326	10.0672
ENSMUST00000087445	Tuba3b	protein_coding	0.90407	-0.65471	0.945853	2.82032	2.28663	2.26352	2.25704	0.252299	1.72335	0.373018	1.70024	0.378492	2.25704	1.70024	2.26352	-0.65471	6.66966
ENSMUST00000009143	Bmp7	protein_coding	1.59176	0.296014	-1.68839	3.35601	2.23735	2.96913	2.75441	0.0389727	1.63576	0.228651	2.36753	0.0771408	2.75441	1.63576	2.23735	-1.68839	14.5652
ENSMUST00000029454	Casq2	protein_coding	-0.204809	0.821374	0.836975	2.83697	3.40657	2.19904	2.27755	0.159502	2.84715	0.0778441	1.63961	0.309429	2.84715	1.63961	2.19904	-0.204809	11.1235
ENSMUST00000114865	Grik4	protein_coding	0.397835	0.93859	0.439618	2.21723	3.11259	2.17875	1.60356	0.316461	2.49893	0.13469	1.56508	0.325912	2.49893	1.56508	2.17875	0.397835	8.55293
ENSMUST00000171105	4930562C15Rik	protein_coding	-0.225632	-0.19945	0.816151	2.13808	3.91182	4.41922	1.92114	0.38037	3.69487	0.0912423	4.20228	0.0561648	4.20228	1.92114	2.13808	-0.225632	12.4806
ENSMUST00000036315	Gria1	protein_coding	-0.324422	-0.29824	0.717361	2.10968	2.16666	2.97754	1.99153	0.154549	2.04851	0.142243	2.85939	0.0400298	2.85939	1.99153	2.10968	-0.324422	14.0712
ENSMUST00000042692	Tcp11	protein_coding	0.161735	0.77288	0.203518	3.01087	4.03615	2.10615	2.6035	0.145593	3.62877	0.0422561	1.69877	0.342909	3.62877	1.69877	2.10615	0.161735	12.3225
ENSMUST00000124448	Il15ra	protein_coding	-0.0669081	-0.040726	-1.02513	2.1448	2.07054	2.19943	2.45582	0.229571	2.38156	0.24273	2.51045	0.217847	2.51045	2.38156	2.07054	-1.02513	8.82262
ENSMUST00000172994	H2-Q1	protein_coding	-1.37114	0.655043	-1.32936	3.3145	2.05582	2.66074	3.66117	0.0624484	2.40248	0.217141	3.0074	0.123414	3.66117	2.40248	2.05582	-1.37114	12.7857
ENSMUST00000078324	Cacnb4	protein_coding	0.105299	-0.868519	1.14708	2.35654	3.41267	2.04971	2.00111	0.0421072	3.05725	0.00148257	1.69429	0.0873865	3.05725	1.69429	2.04971	-0.868519	24.2379
ENSMUST00000003509	St8sia6	protein_coding	-0.150906	-0.124724	-0.372157	2.39338	2.03901	3.49395	2.60511	0.0436228	2.25075	0.0822413	3.70568	0.00393677	3.70568	2.25075	2.03901	-0.372157	22.3353
ENSMUST00000015540	Cd83	protein_coding	-0.953405	0.0727774	-0.911622	2.08838	2.01412	4.63486	2.60313	0.182184	2.52887	0.19464	5.14962	0.00690078	5.14962	2.52887	2.01412	-0.953405	16.6309
ENSMUST00000128342	Gm16576	lincRNA	-0.70514	-0.26392	1.33664	2.27524	1.99935	2.65431	1.8704	0.115005	1.59451	0.180627	2.24947	0.055387	2.24947	1.59451	1.99935	-0.70514	13.535
ENSMUST00000106045	Nlrp6	protein_coding	-1.78883	-1.76264	-1.74704	3.64527	1.98605	2.24305	5.41134	0.00801174	3.75212	0.0662172	4.00912	0.0488625	5.41134	3.75212	1.98605	-1.78883	21.1208
ENSMUST00000112990	Mid2	protein_coding	0.666389	-0.155426	-2.46175	3.31961	1.92342	3.27377	3.48963	0.0110943	2.09344	0.131002	3.44379	0.0121443	3.48963	2.09344	1.92342	-2.46175	21.8895
ENSMUST00000100739	Fam105a	protein_coding	-0.354372	-1.32819	-0.312589	1.85734	2.31359	3.54424	2.45267	0.209898	2.90893	0.134034	4.13957	0.0331496	4.13957	2.45267	1.85734	-1.32819	13.955
ENSMUST00000105487	Grik2	protein_coding	0.884941	-1.08888	-2.07328	1.83361	2.49632	3.03881	2.06557	0.230089	2.72828	0.115159	3.27077	0.0604067	3.27077	2.06557	1.83361	-2.07328	12.8748
ENSMUST00000044850	Abca9	protein_coding	-0.522763	0.673344	-0.48098	1.76695	2.25212	2.70705	1.76344	0.16868	2.24861	0.0759279	2.70355	0.0317299	2.70355	1.76344	1.76695	-0.522763	15.6164
ENSMUST00000031694	Lmod2	protein_coding	0.169062	-0.804756	0.210845	1.53277	1.72155	2.2834	1.60467	0.365201	1.79345	0.297839	2.3553	0.152345	2.3553	1.60467	1.53277	-0.804756	8.20024
ENSMUST00000168347	5330438I03Rik	protein_coding	0.634936	0.24608	-1.32328	1.48407	2.60246	3.2232	1.41897	0.462406	2.53736	0.21919	3.1581	0.133633	3.1581	1.41897	1.48407	-1.32328	8.60358
ENSMUST00000084763	Nlrp14	protein_coding	-0.562457	0.0486873	0.0642882	1.47933	1.99003	3.93654	1.60117	0.262075	2.11187	0.121999	4.05839	0.00154925	4.05839	1.60117	1.47933	-0.562457	19.8257
ENSMUST00000064594	Slc8a3	protein_coding	0.155609	-1.14014	-0.539574	1.96293	2.19352	1.47853	2.37439	0.214487	2.60498	0.175721	1.89	0.312457	2.60498	1.89	1.47853	-1.14014	8.88331
ENSMUST00000085591	Pdx1	protein_coding	-1.96684	-1.94066	-1.92505	3.5668	1.46012	3.78493	5.51088	0.000764996	3.4042	0.0478141	5.72901	0.000466529	5.72901	3.4042	1.46012	-1.96684	35.7725
ENSMUST00000078470	Kcnh1	protein_coding	0.0980134	-1.68316	-2.66756	1.58037	1.42811	1.483	2.54325	0.128672	2.39099	0.152571	2.44588	0.143232	2.54325	2.39099	1.42811	-2.66756	11.7478
ENSMUST00000109645	Vstm2a	protein_coding	-1.56157	-1.53539	-0.519789	1.93964	1.40595	3.08328	3.05864	0.17333	2.52495	0.257956	4.20228	0.0648919	4.20228	2.52495	1.40595	-1.56157	11.6851
ENSMUST00000050003	1700001O22Rik	protein_coding	-0.592665	-0.566483	-0.550882	2.77105	1.37486	2.81118	3.34095	0.231568	1.94477	0.451188	3.38109	0.226041	3.38109	1.94477	1.37486	-0.592665	7.49158
ENSMUST00000062292	Foxc1	protein_coding	-1.85317	-0.826988	0.188613	1.35854	1.81479	2.48356	1.95789	0.261422	2.41414	0.162193	3.08291	0.0727429	3.08291	1.95789	1.35854	-1.85317	11.5628
ENSMUST00000056110	Dlk1	protein_coding	-0.48848	-0.0472604	-2.03166	2.6122	2.98154	1.3304	3.25221	0.0668647	3.62156	0.041638	1.97042	0.264653	3.62156	1.97042	1.3304	-2.03166	14.4263
ENSMUST00000102648	Oxct2b	protein_coding	-0.666146	-0.639964	-0.624363	1.69757	1.30138	1.6002	2.34095	0.275273	1.94477	0.377235	2.24358	0.295511	2.34095	1.94477	1.30138	-0.666146	6.96786
ENSMUST00000057613	Gdf6	protein_coding	-1.67681	-1.65063	-1.63503	1.8244	1.29071	3.43753	3.47846	0.128715	2.94477	0.199507	5.09158	0.0276843	5.09158	2.94477	1.29071	-1.67681	14.4979
ENSMUST00000154940	Matn4	protein_coding	-1.89488	0.131306	-1.85309	2.46883	1.24257	1.95643	3.33924	0.16618	2.11298	0.348902	2.82683	0.230138	3.33924	2.11298	1.24257	-1.89488	8.63345
ENSMUST00000047666	Pgm5	protein_coding	-1.54778	0.478399	-1.506	1.95343	1.22709	4.73648	2.47674	0.130958	1.75041	0.301429	5.25979	0.000999472	5.25979	1.75041	1.22709	-1.54778	20.2808
ENSMUST00000161354	Abcg4	protein_coding	-1.85064	-1.82445	-1.80885	1.19115	1.43882	2.00067	3.01903	0.228881	3.26669	0.193555	3.82855	0.13094	3.82855	3.01903	1.19115	-1.85064	10.2995
ENSMUST00000084289	Eif2c4	protein_coding	1.02317	-1.53561	-2.52001	1.18043	1.72766	1.84205	1.41396	0.397354	1.96119	0.25465	2.07558	0.229852	2.07558	1.41396	1.18043	-2.52001	7.52222
ENSMUST00000110538	Duoxa1	protein_coding	-0.156974	-1.13079	-1.11519	3.58525	1.13248	1.3724	4.31008	0.00137638	1.85731	0.262755	2.09724	0.187102	4.31008	1.85731	1.13248	-1.13079	19.2019
ENSMUST00000038489	Pygo1	protein_coding	0.158632	-2.81519	-1.21462	1.10731	2.93351	1.42497	1.93593	0.178075	3.76213	0.00743352	2.2536	0.113383	3.76213	1.93593	1.10731	-2.81519	17.6086
ENSMUST00000160328	Dok6	protein_coding	-0.885358	0.462752	-1.84358	1.61586	1.08216	1.75949	2.06453	0.292567	1.53084	0.419984	2.20817	0.261624	2.20817	1.53084	1.08216	-1.84358	6.87489
ENSMUST00000081721	Ezh2	protein_coding	9.59532	9.92516	10.6901	7.31204	7.47577	7.94378	-2.83342	2.75e-06	-2.66969	7.98e-06	-2.20168	0.00014822	-2.20168	-2.83342	7.31204	9.59532	66.7186
ENSMUST00000132250	Gm10653	pseudogene	5.30598	7.99167	8.0482	5.21026	5.64696	4.74516	-2.33093	0.0938996	-1.89422	0.166464	-2.79603	0.0492533	-1.89422	-2.79603	4.74516	5.30598	14.3386
ENSMUST00000154378	Apool	protein_coding	4.90155	5.35907	5.22087	3.4839	3.73157	3.1235	-1.68904	0.0501622	-1.44137	0.0889829	-2.04945	0.0198866	-1.44137	-2.04945	3.1235	4.90155	18.659
ENSMUST00000107576	1700001P01Rik	protein_coding	5.53063	3.85637	6.0419	3.1939	2.79772	2.35957	-2.20522	0.20075	-2.60141	0.138781	-3.03956	0.0943647	-2.20522	-3.03956	2.35957	3.85637	11.8823
ENSMUST00000117683	Gm14021	pseudogene	5.52368	5.08591	3.70297	2.24353	1.16927	0.146164	-2.71051	0.464728	-3.78477	0.318523	-4.80788	0.2365	-2.71051	-4.80788	0.146164	3.70297	6.70434
ENSMUST00000005262	4930550C14Rik	protein_coding	4.54699	4.62762	3.69568	-0.11167	2.39903	-0.20904	-4.45872	0.175999	-1.94802	0.503805	-4.55609	0.165737	-1.94802	-4.55609	-0.20904	3.69568	8.44039
ENSMUST00000122051	1700029I01Rik	pseudogene	5.38162	3.42357	5.64353	3.61605	3.16328	3.06616	-1.47718	0.0391702	-1.92995	0.00896189	-2.02706	0.00640481	-1.47718	-2.02706	3.06616	3.42357	26.0106
ENSMUST00000115033	Tmub1	protein_coding	4.27666	5.13934	3.41797	2.97052	3.02179	1.73564	-1.47387	0.257149	-1.4226	0.270983	-2.70875	0.052322	-1.4226	-2.70875	1.73564	3.41797	11.2283
ENSMUST00000027291	Zap70	protein_coding	3.34909	3.22327	4.52837	1.06894	-1.00532	0.556534	-2.75908	0.371756	-4.83334	0.166232	-3.27148	0.29459	-2.75908	-4.83334	-1.00532	3.22327	8.01212
ENSMUST00000031632	Zkscan14	protein_coding	5.23515	2.89568	4.21085	1.79581	0.136585	1.11348	-2.61075	0.473873	-4.26997	0.260071	-3.29308	0.364586	-2.61075	-4.26997	0.136585	2.89568	6.20522
ENSMUST00000050714	Igfals	protein_coding	2.76674	3.67744	3.69304	1.69304	-0.966179	2.01071	-1.74585	0.503695	-4.40508	0.13774	-1.42819	0.593828	-1.42819	-4.40508	-0.966179	2.76674	6.37867
ENSMUST00000064061	Scrt2	protein_coding	3.3803	3.7988	2.74401	1.88151	-0.0672187	1.13206	-1.48909	0.545169	-3.43782	0.171468	-2.23853	0.347149	-1.48909	-3.43782	-0.0672187	2.74401	6.85604
ENSMUST00000026677	Nat1	protein_coding	3.80164	2.74036	2.56332	-0.244038	-0.318298	-0.341408	-3.38905	0.311045	-3.46331	0.297278	-3.48642	0.293148	-3.38905	-3.48642	-0.341408	2.56332	7.21596
ENSMUST00000127673	9530051G07Rik	lincRNA	2.46151	2.48769	2.50329	0.628824	0.969602	0.26842	-1.85544	0.347125	-1.51467	0.442052	-2.21585	0.262372	-1.51467	-2.21585	0.26842	2.46151	6.42479
ENSMUST00000112935	Nmnat3	protein_coding	3.35978	2.38596	3.1671	0.664595	-0.994627	-0.0177374	-2.36369	0.468453	-4.02291	0.254809	-3.04602	0.35343	-2.36369	-4.02291	-0.994627	2.38596	6.33126
ENSMUST00000040312	Trib3	protein_coding	4.7995	3.61269	2.16886	2.49079	-0.905403	0.65645	-1.4025	0.375128	-4.79868	0.0199539	-3.23683	0.0636762	-1.4025	-4.79868	-0.905403	2.16886	15.2975
ENSMUST00000100190	9430097D07Rik	protein_coding	2.14286	3.04351	4.30012	-0.400322	0.525418	-0.497692	-3.83155	0.27298	-2.90581	0.370267	-3.92892	0.258345	-2.90581	-3.92892	-0.497692	2.14286	7.2907
ENSMUST00000096114	Rnls	protein_coding	4.22872	3.82194	2.10058	1.10058	1.02632	2.2256	-2.53091	0.23991	-2.60517	0.224741	-1.40588	0.503186	-1.40588	-2.60517	1.02632	2.10058	7.21419
ENSMUST00000105046	Hmga1-rs1	protein_coding	1.78852	4.01633	4.55277	0.508373	1.01908	1.411	-3.33652	0.10324	-2.82582	0.145607	-2.43389	0.19653	-2.43389	-3.33652	0.508373	1.78852	11.649
ENSMUST00000120824	Gm15550	pseudogene	1.62617	4.82228	4.25292	1.08299	0.0087302	-0.0143799	-2.98865	0.190325	-4.06291	0.105895	-4.08602	0.103649	-2.98865	-4.08602	-0.0143799	1.62617	12.3422
ENSMUST00000054055	Usp29	protein_coding	3.84682	1.5929	4.12307	1.12307	2.04881	1.8737	-2.41421	0.137677	-1.48847	0.339048	-1.66358	0.285227	-1.48847	-2.41421	1.12307	1.5929	8.63786
ENSMUST00000170510	Gm5919	protein_coding	1.37318	3.72129	1.94548	-0.754963	-1.82922	-1.85233	-3.46508	0.354821	-4.53934	0.255515	-4.56245	0.252789	-3.46508	-4.56245	-1.85233	1.37318	7.55163
ENSMUST00000142833	Gm12522	lincRNA	3.55878	1.20645	3.42369	-0.099874	0.825866	0.802756	-3.1485	0.252611	-2.22276	0.396044	-2.24587	0.390287	-2.22276	-3.1485	-0.099874	1.20645	6.48601
ENSMUST00000178598	AC162391.1	protein_coding	1.04885	4.69952	5.12038	0.505667	1.43141	0.408297	-3.88291	0.0226077	-2.95717	0.0554886	-3.98028	0.0193947	-2.95717	-3.98028	0.408297	1.04885	21.2476
