# Supplementary material for: Chromatin dynamics and the role of G9a in gene regulation and enhancer silencing during early mouse development
Source: eLife. 2015 Nov 9;4:e09571. doi: 10.7554/eLife.09571 (PMC4729692; doi:10.7554/eLife.09571)
Supplement: Figure 2—source data 4. — EASE: Expression Analysis Systematic Explorer; GO: gene ontology. DOI: http://dx.doi.org/10.7554/eLife.09571.008 [file elife-09571-fig2-data4.xls]

## Sheet: Ezh2 GO term
Figure 2-source data 4. List of enriched GO terms in genes upregulated in E6.25 Ezh2-/- epiblast GO term enrichment for biological processes was calculated using DAVID software with minimum 5 genes in a category and EASE p-value<0.05
Term	Gene Count	% of Query	P-Value
skeletal system development	13	8.3	5.9e-07
embryonic morphogenesis	12	7.6	3.6e-05
neural crest cell differentiation	5	3.2	7.5e-05
neural crest cell development	5	3.2	7.5e-05
positive regulation of biosynthetic process	14	8.9	0.00011
positive regulation of transcription from RNA polymerase II promoter	11	7	0.00018
cell motion	11	7	0.00022
positive regulation of nitrogen compound metabolic process	13	8.3	0.00026
mesenchymal cell development	5	3.2	0.00031
mesenchymal cell differentiation	5	3.2	0.00036
mesenchyme development	5	3.2	0.00039
positive regulation of cellular biosynthetic process	13	8.3	0.00041
positive regulation of transcription	12	7.6	0.00043
urogenital system development	7	4.5	0.00052
positive regulation of gene expression	12	7.6	0.00054
positive regulation of transcription, DNA-dependent	11	7	0.00059
positive regulation of RNA metabolic process	11	7	0.00063
positive regulation of nucleobase, nucleoside, nucleotide and nucleic acid metabolic process	12	7.6	0.00077
localization of cell	9	5.7	0.00078
cell motility	9	5.7	0.00078
ossification	6	3.8	0.00083
kidney development	6	3.8	0.00087
regulation of transcription, DNA-dependent	22	14	0.00087
positive regulation of macromolecule biosynthetic process	12	7.6	0.0011
regulation of RNA metabolic process	22	14	0.0011
tissue morphogenesis	8	5.1	0.0013
bone development	6	3.8	0.0013
cell migration	8	5.1	0.0014
sex differentiation	6	3.8	0.0021
growth	7	4.5	0.0022
tube development	8	5.1	0.0023
embryonic skeletal system development	5	3.2	0.0026
enzyme linked receptor protein signaling pathway	8	5.1	0.0028
regulation of transcription from RNA polymerase II promoter	12	7.6	0.0034
regulation of transcription	27	17.2	0.0039
positive regulation of macromolecule metabolic process	12	7.6	0.0042
embryonic organ morphogenesis	6	3.8	0.0052
development of primary sexual characteristics	5	3.2	0.0058
embryonic organ development	7	4.5	0.0065
chordate embryonic development	9	5.7	0.0087
embryonic development ending in birth or egg hatching	9	5.7	0.0092
reproductive developmental process	7	4.5	0.01
epithelium development	7	4.5	0.011
gland development	6	3.8	0.012
positive regulation of immune system process	6	3.8	0.014
muscle tissue development	5	3.2	0.015
cell-cell signaling	7	4.5	0.015
homeostatic process	10	6.4	0.02
axonogenesis	5	3.2	0.026
positive regulation of multicellular organismal process	5	3.2	0.026
tube morphogenesis	5	3.2	0.031
morphogenesis of an epithelium	5	3.2	0.032
sensory organ development	6	3.8	0.033
muscle organ development	5	3.2	0.034
neuron projection morphogenesis	5	3.2	0.034
cell morphogenesis involved in neuron differentiation	5	3.2	0.037
pattern specification process	6	3.8	0.047
