# Supplementary material for: Chromatin dynamics and the role of G9a in gene regulation and enhancer silencing during early mouse development
Source: eLife. 2015 Nov 9;4:e09571. doi: 10.7554/eLife.09571 (PMC4729692; doi:10.7554/eLife.09571)
Supplement: Figure 5—source data 1. — Enrichment was called by k-means clustering. DOI: http://dx.doi.org/10.7554/eLife.09571.019 [file elife-09571-fig5-data1.xls]

## Sheet: H3K27me3 prom.
List of promoters enriched for H3K27me3in E6.25 epiblast sample. A threshold was set based on kmeans clustering (3 clusters) of average Log2(H3K9me2/Input) enrichment.
Gene.ID	chr	start	stop	Epiblast.H3K27me3.25k.1.bed.rpkm	Epiblast.H3K27me3.25k.2.bed.rpkm	Epiblast.H3K27me3.25k.input.1.bed.rpkm	Epiblast.H3K27me3.25k.input.2.bed.rpkm	Epiblast.H3K27me3.25k.mean.rpkm	Epiblast.Input.25k.mean.rpkm	Epiblast.Log2H3K27me3.vs.Input.25k.mean
Slfn5	chr11	82932602	82934602	18.0832	6.52109	0	0.194354	12.3022	0.0971772	6.84394
Hbq1a	chr11	32299069	32301069	1.75809	0.491315	0	0	1.1247	0	6.82617
Dand5	chr8	84799140	84801140	11.8043	3.5732	0	0.121472	7.68876	0.0607358	6.76604
Slfn5	chr11	82932382	82934382	15.1949	5.40447	0	0.17006	10.2997	0.0850301	6.7614
Dand5	chr8	84799024	84801024	11.6787	3.30521	0	0.121472	7.49198	0.0607358	6.72869
Boll	chr1	55362319	55364319	3.64176	1.0273	0	0.0242943	2.33453	0.0121472	6.72603
Boll	chr1	55362319	55364319	3.64176	1.0273	0	0.0242943	2.33453	0.0121472	6.72603
Zfp536	chr7	37772562	37774562	12.3066	5.09181	0	0.145766	8.69922	0.0728829	6.71533
Zfp536	chr7	37772577	37774577	12.0555	5.09181	0	0.145766	8.57365	0.0728829	6.69437
Trim34b	chr7	104299230	104301230	2.00925	0	0	0	1.00462	0	6.6648
Parp12	chr6	39117349	39119349	6.2789	2.94789	0	0.0728829	4.61339	0.0364415	6.6374
Zfp536	chr7	37772641	37774641	11.5532	4.91315	0	0.145766	8.23316	0.0728829	6.63598
Lox	chr18	52528708	52530708	11.6787	4.77916	0	0.145766	8.22895	0.0728829	6.63524
Hmx1	chr5	35387476	35389476	11.302	2.63524	0	0.121472	6.96862	0.0607358	6.62436
Boll	chr1	55361707	55363707	5.39985	1.33995	0	0.0485886	3.3699	0.0242943	6.62287
Boll	chr1	55361726	55363726	5.27427	1.33995	0	0.0485886	3.30711	0.0242943	6.59581
Boll	chr1	55362469	55364469	3.26503	0.982631	0	0.0242943	2.12383	0.0121472	6.59018
Zeb1	chr18	5591190	5593190	4.77196	1.74194	0	0.0485886	3.25695	0.0242943	6.57383
Zeb1	chr18	5591191	5593191	4.77196	1.74194	0	0.0485886	3.25695	0.0242943	6.57383
Pde8a	chr7	81212596	81214596	4.89754	1.51861	0	0.0485886	3.20807	0.0242943	6.55208
Lox	chr18	52528867	52530867	10.9253	4.6005	0	0.145766	7.76289	0.0728829	6.55123
Nat8l	chr5	33994984	33996984	5.39985	3.26055	0	0.0728829	4.3302	0.0364415	6.5462
Pax2	chr19	44758918	44760918	17.0786	7.10174	0	0.242943	12.0902	0.121472	6.52413
Mafa	chr15	75746922	75748922	4.01849	1.96526	0	0.0485886	2.99188	0.0242943	6.45175
Zeb1	chr18	5591439	5593439	7.4091	2.8139	0	0.0971772	5.1115	0.0485886	6.4498
Zeb1	chr18	5591382	5593382	7.4091	2.6799	0	0.0971772	5.0445	0.0485886	6.4308
Zeb1	chr18	5591393	5593393	7.4091	2.6799	0	0.0971772	5.0445	0.0485886	6.4308
Zeb1	chr18	5591393	5593393	7.4091	2.6799	0	0.0971772	5.0445	0.0485886	6.4308
Neurog1	chr13	56251163	56253163	11.8043	4.4665	0	0.17006	8.13541	0.0850301	6.42146
Zeb1	chr18	5590891	5592891	4.14407	1.69727	0	0.0485886	2.92067	0.0242943	6.41712
Zeb1	chr18	5590891	5592891	4.14407	1.69727	0	0.0485886	2.92067	0.0242943	6.41712
Zeb1	chr18	5590912	5592912	4.14407	1.69727	0	0.0485886	2.92067	0.0242943	6.41712
Hoxd8	chr2	74703615	74705615	9.92066	3.17122	0.109207	0.0242943	6.54594	0.0667509	6.41648
Hoxd10	chr2	74658861	74660861	17.8321	8.62035	0	0.291532	13.2262	0.145766	6.40897
Insm2	chr12	55597917	55599917	13.688	5.80645	0	0.218649	9.74722	0.109324	6.35351
Bhlhe23	chr2	180775749	180777749	11.0509	3.88586	0	0.17006	7.46836	0.0850301	6.29819
Lmx1a	chr1	167688558	167690558	8.66488	4.24318	0	0.145766	6.45403	0.0728829	6.28521
Isl2	chr9	55541336	55543336	19.4646	7.59305	0.109207	0.218649	13.5288	0.163928	6.28247
Slit2	chr5	47983994	47985994	9.04161	3.75186	0	0.145766	6.39674	0.0728829	6.27237
Pitx1	chr13	55835192	55837192	18.8367	6.11911	0.109207	0.194354	12.4779	0.151781	6.27035
Trim47	chr11	116109237	116111237	10.7997	3.84119	0	0.17006	7.32045	0.0850301	6.26937
Slit2	chr5	47983793	47985793	9.04161	3.7072	0	0.145766	6.3744	0.0728829	6.26733
Slit2	chr5	47983811	47985811	9.04161	3.7072	0	0.145766	6.3744	0.0728829	6.26733
Slit2	chr5	47983811	47985811	9.04161	3.7072	0	0.145766	6.3744	0.0728829	6.26733
Slit2	chr5	47983811	47985811	9.04161	3.7072	0	0.145766	6.3744	0.0728829	6.26733
Mmp9	chr2	164949696	164951696	12.8089	3.66253	0	0.194354	8.23574	0.0971772	6.26558
5730596B20Rik	chr6	52176498	52178498	30.641	9.60298	0.0546037	0.461592	20.122	0.258098	6.23059
Hoxd10	chr2	74658419	74660419	18.5855	8.26303	0	0.34012	13.4243	0.17006	6.2213
Trp73	chr4	154139208	154141208	15.8228	5.89578	0.0546037	0.218649	10.8593	0.136626	6.21197
Trim47	chr11	116109246	116111246	10.1718	3.84119	0	0.17006	7.0065	0.0850301	6.20622
Zeb1	chr18	5590872	5592872	3.51618	1.51861	0	0.0485886	2.5174	0.0242943	6.20354
Zbtb42	chr12	112677878	112679878	10.1718	3.7072	0	0.17006	6.9395	0.0850301	6.19238
Bves	chr10	45334762	45336762	4.26965	2.45658	0	0.0728829	3.36311	0.0364415	6.18252
3110039M20Rik	chr12	49384174	49386174	9.04161	4.68983	0	0.17006	6.86572	0.0850301	6.17698
Hoxa11	chr6	52239795	52241795	22.4784	10.9876	0.0546037	0.388709	16.733	0.221656	6.17543
Npr3	chr15	11904674	11906674	14.8182	4.42184	0.0546037	0.194354	9.62002	0.124479	6.16208
Hes5	chr4	154959971	154961971	5.77658	2.59057	0	0.0971772	4.18358	0.0485886	6.16142
Runx3	chr4	135152160	135154160	5.02312	3.30521	0	0.0971772	4.16416	0.0485886	6.15472
Hoxd8	chr2	74703905	74705905	7.91141	2.8139	0.109207	0.0242943	5.36265	0.0667509	6.12931
Hes5	chr4	154959923	154961923	6.78121	3.03722	0	0.121472	4.90921	0.0607358	6.11984
Hoxa11	chr6	52239854	52241854	23.3575	12.0596	0.0546037	0.437298	17.7085	0.245951	6.11325
Nell1	chr7	49974334	49976334	4.26965	3.79653	0	0.0971772	4.03309	0.0485886	6.10869
Zeb1	chr18	5590860	5592860	3.26503	1.38462	0	0.0485886	2.32482	0.0242943	6.0892
E130114P18Rik	chr4	97777048	97779048	5.02312	2.90323	0	0.0971772	3.96317	0.0485886	6.08353
Hoxd3	chr2	74720978	74722978	24.3621	9.24566	0	0.485886	16.8039	0.242943	6.0547
Adra2a	chr19	54044182	54046182	6.65563	2.6799	0	0.121472	4.66777	0.0607358	6.04724
Dand5	chr8	84799344	84801344	13.3113	3.97519	0	0.242943	8.64322	0.121472	6.04042
Slit2	chr5	47983571	47985571	7.78583	3.08189	0	0.145766	5.43386	0.0728829	6.03741
Lmx1a	chr1	167688239	167690239	7.28352	3.5732	0	0.145766	5.42836	0.0728829	6.03595
Paqr9	chr9	95558817	95560817	14.3159	5.13648	0.109207	0.17006	9.72618	0.139634	6.02385
Fam150b	chr12	30883322	30885322	11.4276	4.37717	0.0546037	0.17006	7.90238	0.112332	6.01524
Lbx1	chr19	45234811	45236811	8.28814	2.36725	0	0.145766	5.32769	0.0728829	6.009
Nol4	chr18	23039344	23041344	6.15332	4.37717	0	0.145766	5.26525	0.0728829	5.99202
Hoxa11	chr6	52244243	52246243	17.9576	8.39702	0.0546037	0.34012	13.1773	0.197362	5.99086
Zbtb42	chr12	112677828	112679828	9.92066	3.66253	0	0.194354	6.79159	0.0971772	5.9878
Zbtb42	chr12	112677840	112679840	9.92066	3.66253	0	0.194354	6.79159	0.0971772	5.9878
Doc2b	chr11	75795049	75797049	10.0462	2.18859	0.0546037	0.121472	6.11741	0.0880376	5.9658
Gm16140	chr11	19008130	19010130	23.2319	8.48635	0.0546037	0.437298	15.8591	0.245951	5.95421
Onecut3	chr10	80493835	80495835	14.4415	7.01241	0.109207	0.218649	10.7269	0.163928	5.94795
Otx1	chr11	22001897	22003897	4.01849	3.17122	0	0.0971772	3.59486	0.0485886	5.94318
Gm16140	chr11	19008128	19010128	22.9808	8.39702	0.0546037	0.437298	15.6889	0.245951	5.93865
Parp10	chr15	76231570	76233570	9.29277	3.75186	0	0.194354	6.52231	0.0971772	5.92952
Parp10	chr15	76231574	76233574	9.29277	3.75186	0	0.194354	6.52231	0.0971772	5.92952
Zeb1	chr18	5592308	5594308	13.5624	4.37717	0.109207	0.17006	8.96979	0.139634	5.90717
Lhx3	chr2	26205575	26207575	9.79508	3.39454	0.0546037	0.145766	6.59481	0.100185	5.90552
Drd5	chr5	38318509	38320509	14.1903	4.37717	0	0.291532	9.28374	0.145766	5.89881
Hoxa11	chr6	52243393	52245393	18.46	8.66501	0	0.437298	13.5625	0.218649	5.89141
Tdrd6	chr17	43629299	43631299	3.89292	3.03722	0	0.0971772	3.46507	0.0485886	5.89028
Tdrd6	chr17	43629299	43631299	3.89292	3.03722	0	0.0971772	3.46507	0.0485886	5.89028
Pax6	chr2	105682754	105684754	20.218	7.54839	0.109207	0.34012	13.8832	0.224664	5.88764
Hsf4	chr8	105268801	105270801	13.5624	7.63772	0	0.34012	10.6001	0.17006	5.88081
Hsf4	chr8	105268801	105270801	13.5624	7.63772	0	0.34012	10.6001	0.17006	5.88081
Hsf4	chr8	105268801	105270801	13.5624	7.63772	0	0.34012	10.6001	0.17006	5.88081
Bhlhe23	chr2	180775900	180777900	12.8089	4.42184	0.0546037	0.218649	8.61539	0.136626	5.87837
Hsf4	chr8	105268829	105270829	13.5624	7.59305	0	0.34012	10.5777	0.17006	5.87777
Hsf4	chr8	105268874	105270874	13.5624	7.45906	0	0.34012	10.5107	0.17006	5.86861
Hsf4	chr8	105268874	105270874	13.5624	7.45906	0	0.34012	10.5107	0.17006	5.86861
Hsf4	chr8	105268856	105270856	13.5624	7.41439	0	0.34012	10.4884	0.17006	5.86555
Ank1	chr8	22974136	22976136	9.16719	1.87593	0	0.17006	5.52156	0.0850301	5.86316
Nefh	chr11	4947064	4949064	10.9253	4.28784	0	0.242943	7.60656	0.121472	5.85632
Gm3424	chr14	5879382	5881382	1.00462	0.133995	0	0	0.569309	0	5.85626
Zic4	chr9	91367367	91369367	25.1156	8.70968	0.0546037	0.51018	16.9126	0.282392	5.85491
Dmrta2	chr4	109977053	109979053	7.28352	5.09181	0	0.194354	6.18767	0.0971772	5.85365
Slc13a5	chr11	72265844	72267844	5.90216	2.23325	0	0.121472	4.06771	0.0607358	5.84917
Runx3	chr4	135151938	135153938	5.90216	3.61787	0	0.145766	4.76001	0.0728829	5.84678
Hmx1	chr5	35387858	35389858	11.9299	4.55583	0	0.267237	8.24287	0.133619	5.84458
Nell1	chr7	49974069	49976069	2.51156	2.76923	0	0.0728829	2.64039	0.0364415	5.83465
Irx2	chr13	72631085	72633085	16.5763	7.41439	0.109207	0.291532	11.9953	0.20037	5.83461
B3gat2	chr1	23760926	23762926	9.92066	3.61787	0	0.218649	6.76926	0.109324	5.82817
Hoxb5	chr11	96301595	96303595	19.2134	6.74442	0	0.437298	12.9789	0.218649	5.828
E130114P18Rik	chr4	97777078	97779078	5.14869	2.85856	0	0.121472	4.00363	0.0607358	5.82632
Zfp536	chr7	37771875	37773875	9.92066	3.93052	0.0546037	0.17006	6.92559	0.112332	5.82515
Hoxa9	chr6	52225151	52227151	23.4831	9.91564	0.109207	0.461592	16.6994	0.2854	5.82184
Wnt7b	chr15	85580821	85582821	6.40447	3.5732	0.109207	0.0485886	4.98884	0.078898	5.8133
B3gat2	chr1	23761011	23763011	9.79508	3.5732	0	0.218649	6.68414	0.109324	5.80994
Ccr10	chr11	101174443	101176443	12.4322	3.93052	0.0546037	0.218649	8.18137	0.136626	5.80389
Nkx2-2	chr2	147183083	147185083	17.7065	4.91315	0.218415	0.17006	11.3098	0.194237	5.79246
Tlx1	chr19	45151733	45153733	11.6787	6.07444	0.109207	0.194354	8.87659	0.151781	5.77952
Fam46a	chr9	85326124	85328124	4.89754	1.51861	0	0.0971772	3.20807	0.0485886	5.77943
Cdkn2c	chr4	109656853	109658853	15.4461	4.24318	0	0.34012	9.84463	0.17006	5.77425
Phox2b	chr5	67098057	67100057	21.725	9.91564	0.218415	0.34012	15.8203	0.279268	5.77414
Sh3rf3	chr10	58812458	58814458	8.41372	3.61787	0.0546037	0.145766	6.01579	0.100185	5.77315
Hoxa9	chr6	52226370	52228370	29.6364	13.8462	0.218415	0.558769	21.7413	0.388592	5.77004
Trim47	chr11	116107119	116109119	12.3066	5.98511	0	0.315826	9.14587	0.157913	5.76891
Pax1	chr2	147363994	147365994	9.79508	5.80645	0	0.267237	7.80077	0.133619	5.76515
Col19a1	chr1	24586411	24588411	11.0509	4.4665	0	0.267237	7.75868	0.133619	5.75735
Hoxd10	chr2	74680999	74682999	7.4091	4.10918	0	0.194354	5.75914	0.0971772	5.75029
Trim47	chr11	116107035	116109035	12.0555	5.98511	0	0.315826	9.0203	0.157913	5.74899
Bhlhe22	chr3	18053325	18055325	13.4368	3.93052	0.109207	0.194354	8.68368	0.151781	5.74785
Tmem65	chr15	58822530	58824530	2.2604	0.08933	0	0.0242943	1.17487	0.0121472	5.74146
Cdkn2c	chr4	109656827	109658827	15.6972	4.73449	0	0.364415	10.2159	0.182207	5.73342
Gpc5	chr14	115091250	115093250	7.28352	2.76923	0	0.17006	5.02638	0.0850301	5.72786
Sh3rf3	chr10	58812359	58814359	8.16256	3.43921	0.0546037	0.145766	5.80089	0.100185	5.72076
Cdkn1c	chr7	143460050	143462050	11.302	2.85856	0.0546037	0.194354	7.08029	0.124479	5.72039
Cdkn1c	chr7	143460050	143462050	11.302	2.85856	0.0546037	0.194354	7.08029	0.124479	5.72039
Hic1	chr11	75167146	75169146	9.29277	3.5732	0.0546037	0.17006	6.43298	0.112332	5.71886
Hoxa9	chr6	52230089	52232089	21.3482	10.1836	0	0.583063	15.7659	0.291532	5.70927
Hoxa11	chr6	52244795	52246795	21.0971	8.44169	0.109207	0.437298	14.7694	0.273252	5.70535
Irx5	chr8	92355120	92357120	9.92066	2.8139	0.0546037	0.17006	6.36728	0.112332	5.70407
Gpc5	chr14	115091272	115093272	7.03236	2.8139	0	0.17006	4.92313	0.0850301	5.69798
Igsf21	chr4	140245784	140247784	10.0462	3.5732	0	0.242943	6.80972	0.121472	5.69689
Tlx2	chr6	83069293	83071293	13.9391	7.68238	0.109207	0.291532	10.8108	0.20037	5.68473
Hes2	chr4	152158549	152160549	14.0647	6.16377	0.109207	0.267237	10.1142	0.188222	5.67455
Ank1	chr8	22973882	22975882	8.5393	2.32258	0	0.194354	5.43094	0.0971772	5.66579
Tlx2	chr6	83069225	83071225	13.5624	7.63772	0.109207	0.291532	10.6001	0.20037	5.65636
Nbl1	chr4	139091968	139093968	6.40447	4.33251	0	0.194354	5.36849	0.0971772	5.64913
Nbl1	chr4	139091993	139093993	6.40447	4.33251	0	0.194354	5.36849	0.0971772	5.64913
Irf5	chr6	29527270	29529270	10.5485	5.00248	0	0.291532	7.77551	0.145766	5.64334
Adrb1	chr19	56721372	56723372	11.302	4.82382	0.109207	0.194354	8.06292	0.151781	5.64098
Mei1	chr15	82068996	82070996	12.0555	7.01241	0	0.364415	9.53394	0.182207	5.63385
Npas2	chr1	39193212	39195212	7.03236	4.77916	0	0.218649	5.90576	0.109324	5.6316
Gdnf	chr15	7810011	7812011	8.66488	4.33251	0	0.242943	6.49869	0.121472	5.62955
Ank1	chr8	22973844	22975844	8.28814	2.27792	0	0.194354	5.28303	0.0971772	5.62602
Irx5	chr8	92354869	92356869	10.2974	2.94789	0.0546037	0.194354	6.62264	0.124479	5.62413
Irx5	chr8	92354891	92356891	10.2974	2.90323	0.0546037	0.194354	6.60031	0.124479	5.61926
Lhx2	chr2	38352802	38354802	20.218	10.273	0.163811	0.437298	15.2455	0.300554	5.61834
Gas7	chr11	67454724	67456724	7.28352	2.00993	0	0.17006	4.64672	0.0850301	5.61479
Mapk15	chr15	75994939	75996939	21.725	8.933	0	0.607358	15.329	0.303679	5.61177
Gpc5	chr14	115091215	115093215	7.53467	2.85856	0	0.194354	5.19662	0.0971772	5.60228
En1	chr1	120601418	120603418	13.5624	4.77916	0.163811	0.194354	9.17079	0.179083	5.60153
Robo3	chr9	37432163	37434163	14.1903	7.01241	0.0546037	0.364415	10.6014	0.209509	5.59518
Gm16505	chr13	3360029	3362029	3.13945	2.50124	0	0.0971772	2.82034	0.0485886	5.59421
Ppp1r1b	chr11	98348996	98350996	15.1949	6.11911	0.109207	0.315826	10.657	0.212517	5.5831
Ppp1r1b	chr11	98348996	98350996	15.1949	6.11911	0.109207	0.315826	10.657	0.212517	5.5831
Runx3	chr4	135151496	135153496	10.5485	5.80645	0.0546037	0.267237	8.1775	0.160921	5.58203
Nkx1-1	chr5	33432976	33434976	10.5485	4.6005	0.0546037	0.242943	7.57452	0.148773	5.57802
Stxbp2	chr8	3630152	3632152	4.77196	0.80397	0	0.0971772	2.78797	0.0485886	5.57761
Stxbp2	chr8	3630153	3632153	4.77196	0.80397	0	0.0971772	2.78797	0.0485886	5.57761
Stxbp2	chr8	3630153	3632153	4.77196	0.80397	0	0.0971772	2.78797	0.0485886	5.57761
Stxbp2	chr8	3630157	3632157	4.77196	0.80397	0	0.0971772	2.78797	0.0485886	5.57761
Stxbp2	chr8	3630165	3632165	4.77196	0.80397	0	0.0971772	2.78797	0.0485886	5.57761
Stxbp2	chr8	3630170	3632170	4.77196	0.80397	0	0.0971772	2.78797	0.0485886	5.57761
Hs3st3a1	chr11	64435653	64437653	8.03699	2.41191	0.0546037	0.145766	5.22445	0.100185	5.57004
Hmx3	chr7	131541867	131543867	8.79045	3.08189	0.109207	0.121472	5.93617	0.115339	5.56805
Cabp7	chr11	4745778	4747778	2.51156	0.71464	0	0.0485886	1.6131	0.0242943	5.56464
Comp	chr8	70372548	70374548	18.5855	5.31514	0.218415	0.267237	11.9503	0.242826	5.56397
B3gat1	chr9	26732728	26734728	6.02774	2.05459	0.0546037	0.0971772	4.04117	0.0758905	5.5597
Foxq1	chr13	31557170	31559170	7.15794	4.33251	0.0546037	0.17006	5.74522	0.112332	5.556
Sema3c	chr5	17573899	17575899	5.90216	1.87593	0	0.145766	3.88905	0.0728829	5.5559
Mab21l1	chr3	55781510	55783510	16.074	6.78908	0.0546037	0.413003	11.4315	0.233803	5.55242
Hoxa11	chr6	52244989	52246989	23.2319	8.39702	0.218415	0.437298	15.8145	0.327856	5.5496
Satb2	chr1	56968840	56970840	10.7997	4.86849	0	0.315826	7.83409	0.157913	5.54582
Ebf3	chr7	137313414	137315414	4.89754	2.8139	0	0.145766	3.85572	0.0728829	5.54352
Ebf3	chr7	137313445	137315445	4.89754	2.8139	0	0.145766	3.85572	0.0728829	5.54352
Ebf3	chr7	137313445	137315445	4.89754	2.8139	0	0.145766	3.85572	0.0728829	5.54352
Ebf3	chr7	137313445	137315445	4.89754	2.8139	0	0.145766	3.85572	0.0728829	5.54352
Gp1bb	chr16	18620366	18622366	13.1857	4.68983	0.218415	0.145766	8.93775	0.18209	5.54167
Col19a1	chr1	24586472	24588472	10.7997	3.93052	0.0546037	0.242943	7.36511	0.148773	5.53762
Hoxa11	chr6	52244969	52246969	23.7342	8.75434	0.218415	0.461592	16.2443	0.340003	5.53731
Hoxa5	chr6	52203587	52205587	14.6926	6.47643	0.218415	0.218649	10.5845	0.218532	5.53478
Ptf1a	chr2	19444663	19446663	9.29277	6.47643	0.0546037	0.267237	7.8846	0.160921	5.52947
Mkx	chr18	7002782	7004782	15.8228	7.19107	0.163811	0.315826	11.5069	0.239819	5.52673
Hmx1	chr5	35388108	35390108	11.1764	5.40447	0	0.34012	8.29045	0.17006	5.52664
Hoxd9	chr2	74696680	74698680	17.2042	6.02978	0.218415	0.267237	11.617	0.242826	5.52319
Nol4	chr18	23039078	23041078	8.03699	5.40447	0.0546037	0.218649	6.72073	0.136626	5.52055
Olig3	chr10	19355560	19357560	17.2042	7.10174	0	0.51018	12.153	0.25509	5.51987
Frrs1l	chr4	56989391	56991391	8.16256	3.03722	0.0546037	0.17006	5.59989	0.112332	5.5191
Sstr2	chr11	113618476	113620476	10.0462	3.08189	0	0.267237	6.56406	0.133619	5.51647
Grid1	chr14	34818825	34820825	5.90216	1.65261	0	0.145766	3.77738	0.0728829	5.51398
Osbpl6	chr2	76405508	76407508	3.13945	2.18859	0	0.0971772	2.66402	0.0485886	5.51224
Plk5	chr10	80355459	80357459	13.688	6.02978	0.218415	0.194354	9.85889	0.206385	5.51122
Plk5	chr10	80355459	80357459	13.688	6.02978	0.218415	0.194354	9.85889	0.206385	5.51122
Foxf1	chr8	121083474	121085474	4.14407	2.27792	0	0.121472	3.21099	0.0607358	5.50892
Hoxa10	chr6	52233939	52235939	22.4784	9.64765	0.273019	0.413003	16.063	0.343011	5.50879
En2	chr5	28164696	28166696	10.5485	3.5732	0	0.291532	7.06087	0.145766	5.50444
Mdga2	chr12	67220042	67222042	2.63714	1.83127	0.0546037	0.0242943	2.2342	0.039449	5.50412
Sstr2	chr11	113618342	113620342	10.0462	2.90323	0	0.267237	6.47473	0.133619	5.49673
Trim47	chr11	116106740	116108740	10.5485	4.82382	0.0546037	0.267237	7.68618	0.160921	5.49275
Cilp2	chr8	69887185	69889185	20.0925	6.20844	0.273019	0.291532	13.1505	0.282275	5.49274
Tmem132e	chr11	82387900	82389900	3.89292	2.45658	0	0.121472	3.17475	0.0607358	5.49259
Tmem132e	chr11	82387900	82389900	3.89292	2.45658	0	0.121472	3.17475	0.0607358	5.49259
Pcdh7	chr5	57717021	57719021	6.2789	2.23325	0	0.17006	4.25607	0.0850301	5.48838
Pcdh7	chr5	57717021	57719021	6.2789	2.23325	0	0.17006	4.25607	0.0850301	5.48838
Zic4	chr9	91377197	91379197	11.6787	6.07444	0.109207	0.267237	8.87659	0.188222	5.48644
Atf3	chr1	191182108	191184108	5.77658	2.99256	0.0546037	0.121472	4.38457	0.0880376	5.48624
Hand2	chr8	57319983	57321983	11.0509	4.24318	0.0546037	0.267237	7.64702	0.160921	5.48538
Abcb4	chr5	8892721	8894721	8.5393	2.09926	0	0.218649	5.31928	0.109324	5.48098
Six6	chr12	72938724	72940724	12.8089	4.33251	0	0.364415	8.57073	0.182207	5.48036
Sox18	chr2	181670640	181672640	17.9576	8.66501	0.163811	0.413003	13.3113	0.288407	5.48031
Crlf1	chr8	70492158	70494158	14.9438	6.78908	0.273019	0.194354	10.8664	0.233686	5.48003
Hmx2	chr7	131553062	131555062	15.4461	5.71712	0.163811	0.291532	10.5816	0.227671	5.47781
Gfi1	chr5	107725398	107727398	14.0647	7.32506	0	0.461592	10.6949	0.230796	5.47432
Frrs1l	chr4	56989136	56991136	7.91141	2.90323	0.0546037	0.17006	5.40732	0.112332	5.46871
Penk	chr4	4137321	4139321	4.89754	5.89578	0.0546037	0.17006	5.39666	0.112332	5.46587
Lrrc10b	chr19	10456447	10458447	8.03699	4.6005	0	0.267237	6.31874	0.133619	5.4616
Hoxb8	chr11	96283257	96285257	13.9391	6.69975	0.109207	0.34012	10.3195	0.224664	5.46002
Mdga1	chr17	29888950	29890950	13.9391	6.43176	0.0546037	0.388709	10.1855	0.221656	5.4598
Sema3c	chr5	17573766	17575766	5.39985	1.83127	0	0.145766	3.61556	0.0728829	5.45098
Igdcc3	chr9	65140154	65142154	5.52543	1.69727	0	0.145766	3.61135	0.0728829	5.44931
Satb2	chr1	56968872	56970872	10.0462	4.6005	0	0.315826	7.32337	0.157913	5.44869
Emilin3	chr2	160911328	160913328	10.9253	3.93052	0.0546037	0.267237	7.4279	0.160921	5.4435
Pcdhga11	chr18	37764580	37766580	18.2088	6.61042	0.382226	0.17006	12.4096	0.276143	5.43974
BC061194	chr2	18698084	18700084	13.688	7.19107	0	0.461592	10.4395	0.230796	5.43948
Mb21d1	chr9	78441885	78443885	13.4368	7.1464	0.163811	0.291532	10.2916	0.227671	5.43776
Shox2	chr3	66980318	66982318	7.91141	4.77916	0.0546037	0.218649	6.34528	0.136626	5.43774
Gabbr2	chr4	46990873	46992873	7.15794	2.36725	0.0546037	0.145766	4.76259	0.100185	5.43678
Mdga1	chr17	29889084	29891084	13.5624	6.47643	0.0546037	0.388709	10.0194	0.221656	5.43611
Arpp21	chr9	112232626	112234626	9.79508	3.12655	0.109207	0.17006	6.46081	0.139634	5.43444
Arpp21	chr9	112233423	112235423	10.0462	2.85856	0.109207	0.17006	6.4524	0.139634	5.43256
Arpp21	chr9	112232815	112234815	9.6695	3.21588	0.109207	0.17006	6.44269	0.139634	5.43039
Arpp21	chr9	112232872	112234872	9.6695	3.21588	0.109207	0.17006	6.44269	0.139634	5.43039
Islr2	chr9	58200715	58202715	18.8367	7.90571	0.163811	0.437298	13.3712	0.300554	5.42922
Trank1	chr9	111310739	111312739	11.0509	4.68983	0.0546037	0.291532	7.87034	0.173068	5.42781
Nell1	chr7	49973864	49975864	2.51156	2.50124	0	0.0971772	2.5064	0.0485886	5.4246
Nell1	chr7	49973864	49975864	2.51156	2.50124	0	0.0971772	2.5064	0.0485886	5.4246
Hoxa7	chr6	52219393	52221393	31.6456	12.9975	0.43683	0.583063	22.3216	0.509947	5.42458
Arpp21	chr9	112233381	112235381	9.92066	2.90323	0.109207	0.17006	6.41194	0.139634	5.4235
BC061194	chr2	18698023	18700023	13.4368	7.19107	0	0.461592	10.314	0.230796	5.42204
Hes2	chr4	152157867	152159867	14.3159	4.95782	0.163811	0.267237	9.63685	0.215524	5.4187
Zc3hav1	chr6	38353603	38355603	6.78121	4.42184	0	0.242943	5.60152	0.121472	5.41557
Zc3hav1	chr6	38353603	38355603	6.78121	4.42184	0	0.242943	5.60152	0.121472	5.41557
Hoxa9	chr6	52229532	52231532	19.5902	10.7643	0.109207	0.583063	15.1772	0.346135	5.41429
Gm9954	chr5	63649264	63651264	8.28814	2.90323	0	0.242943	5.59568	0.121472	5.41407
Hoxa9	chr6	52229265	52231265	15.5717	8.48635	0.109207	0.437298	12.029	0.273252	5.40948
Supt3	chr17	44734634	44736634	5.14869	2.90323	0	0.17006	4.02596	0.0850301	5.40838
Zbtb46	chr2	181458379	181460379	4.01849	1.96526	0	0.121472	2.99188	0.0607358	5.40728
Emilin3	chr2	160911317	160913317	10.5485	3.93052	0.0546037	0.267237	7.23953	0.160921	5.40649
Ajap1	chr4	153481179	153483179	3.51618	2.45658	0	0.121472	2.98638	0.0607358	5.40464
Hoxa4	chr6	52190753	52192753	12.1811	7.10174	0	0.437298	9.6414	0.218649	5.39953
Hoxa11	chr6	52245214	52247214	19.9669	7.50372	0.218415	0.413003	13.7353	0.315709	5.39921
Hoxa3	chr6	52212336	52214336	22.4784	12.8635	0.163811	0.655946	17.671	0.409879	5.39608
AB041806	chr4	138394198	138396198	6.65563	3.61787	0.0546037	0.17006	5.13675	0.112332	5.39479
Phox2b	chr5	67098301	67100301	17.7065	8.39702	0.163811	0.437298	13.0518	0.300554	5.39436
Hoxa11	chr6	52245221	52247221	19.8413	7.50372	0.218415	0.413003	13.6725	0.315709	5.39261
Hoxa3	chr6	52212339	52214339	22.4784	12.7742	0.163811	0.655946	17.6263	0.409879	5.39243
Sphk1	chr11	116532575	116534575	6.02774	3.97519	0	0.218649	5.00146	0.109324	5.39227
Cd248	chr19	5067078	5069078	8.5393	3.48387	0	0.267237	6.01159	0.133619	5.38983
Mdga2	chr12	67220202	67222202	2.51156	1.60794	0.0546037	0.0242943	2.05975	0.039449	5.38737
Mdga2	chr12	67220221	67222221	2.51156	1.60794	0.0546037	0.0242943	2.05975	0.039449	5.38737
Crlf1	chr8	70492361	70494361	14.0647	6.29777	0.273019	0.194354	10.1812	0.233686	5.38616
Nol3	chr8	105275447	105277447	17.7065	8.48635	0.218415	0.388709	13.0964	0.303562	5.38538
Tbx1	chr16	18585969	18587969	9.04161	5.98511	0	0.34012	7.51336	0.17006	5.38483
Slc13a5	chr11	72265602	72267602	2.38598	1.47395	0	0.0728829	1.92996	0.0364415	5.38447
Slc13a5	chr11	72265602	72267602	2.38598	1.47395	0	0.0728829	1.92996	0.0364415	5.38447
Irx5	chr8	92354831	92356831	9.29277	2.90323	0.0546037	0.218649	6.098	0.136626	5.38048
Hoxd3	chr2	74735515	74737515	23.8598	9.29033	0.218415	0.558769	16.5751	0.388592	5.37883
Gm10710	chr3	83128246	83130246	7.91141	4.01985	0	0.267237	5.96563	0.133619	5.37878
Hand1	chr11	57831818	57833818	10.0462	4.15385	0.0546037	0.267237	7.10004	0.160921	5.37846
Hand1	chr11	57831818	57833818	10.0462	4.15385	0.0546037	0.267237	7.10004	0.160921	5.37846
Pax6	chr2	105681463	105683463	18.46	7.32506	0.163811	0.437298	12.8925	0.300554	5.37666
Klf4	chr4	55530770	55532770	4.5208	3.34988	0	0.17006	3.93534	0.0850301	5.37562
Lhx2	chr2	38351532	38353532	17.3298	8.1737	0.109207	0.485886	12.7517	0.297547	5.37487
Pax6	chr2	105681508	105683508	18.46	7.2804	0.163811	0.437298	12.8702	0.300554	5.37416
Supt3	chr17	44734710	44736710	5.14869	2.6799	0	0.17006	3.9143	0.0850301	5.36791
Osbpl6	chr2	76405538	76407538	2.76271	2.05459	0	0.0971772	2.40865	0.0485886	5.36744
Osbpl6	chr2	76405538	76407538	2.76271	2.05459	0	0.0971772	2.40865	0.0485886	5.36744
Osbpl6	chr2	76405558	76407558	2.76271	2.05459	0	0.0971772	2.40865	0.0485886	5.36744
Dll1	chr17	15373072	15375072	8.79045	5.04715	0	0.315826	6.9188	0.157913	5.36682
Amer2	chr14	60377286	60379286	8.28814	2.76923	0.0546037	0.194354	5.52869	0.124479	5.36409
Fam43b	chr4	138395458	138397458	7.28352	3.26055	0.163811	0.0728829	5.27203	0.118347	5.36297
Onecut2	chr18	64339364	64341364	9.16719	3.61787	0	0.291532	6.39253	0.145766	5.36119
Onecut2	chr18	64339364	64341364	9.16719	3.61787	0	0.291532	6.39253	0.145766	5.36119
Pax6	chr2	105681535	105683535	18.2088	7.2804	0.163811	0.437298	12.7446	0.300554	5.36003
Pax6	chr2	105681537	105683537	18.2088	7.2804	0.163811	0.437298	12.7446	0.300554	5.36003
Irx1	chr13	71962723	71964723	7.66025	2.09926	0	0.218649	4.87975	0.109324	5.3568
A530088E08Rik	chr17	32395709	32397709	13.4368	6.52109	0.0546037	0.413003	9.97897	0.233803	5.35654
Osbpl6	chr2	76405561	76407561	2.76271	2.00993	0	0.0971772	2.38632	0.0485886	5.35406
Dscam	chr16	97169752	97171752	7.28352	2.45658	0	0.218649	4.87005	0.109324	5.35393
Pax6	chr2	105681547	105683547	18.0832	7.2804	0.163811	0.437298	12.6818	0.300554	5.35291
Islr2	chr9	58200799	58202799	18.46	7.81638	0.163811	0.461592	13.1382	0.312701	5.34852
Arpp21	chr9	112233294	112235294	10.0462	3.08189	0.109207	0.194354	6.56406	0.151781	5.34467
Adra1d	chr2	131561283	131563283	6.02774	2.90323	0.0546037	0.145766	4.46548	0.100185	5.34405
Mapk15	chr15	75995713	75997713	24.4877	9.29033	0.109207	0.704535	16.889	0.406871	5.34119
Ush1g	chr11	115321530	115323530	14.0647	4.91315	0.109207	0.34012	9.48894	0.224664	5.3391
Barhl2	chr5	106457440	106459440	12.5578	6.65509	0.163811	0.291532	9.60644	0.227671	5.33846
Ush1g	chr11	115321761	115323761	13.688	5.27047	0.109207	0.34012	9.47923	0.224664	5.33762
Hoxa3	chr6	52210356	52212356	19.4646	8.53102	0.163811	0.51018	13.9978	0.336996	5.33517
Calcr	chr6	3763713	3765713	4.64638	2.00993	0	0.145766	3.32815	0.0728829	5.33183
Lhx2	chr2	38350768	38352768	8.79045	2.99256	0.0546037	0.218649	5.89151	0.136626	5.33087
Arpp21	chr9	112233277	112235277	9.92066	3.08189	0.109207	0.194354	6.50127	0.151781	5.33083
Prdm12	chr2	31639037	31641037	21.5994	10.9429	0.327622	0.461592	16.2712	0.394607	5.33054
Fgf9	chr14	58074115	58076115	8.66488	4.33251	0.109207	0.194354	6.49869	0.151781	5.33025
B020031M17Rik	chr13	120026011	120028011	3.01387	1.65261	0	0.0971772	2.33324	0.0485886	5.32174
Gata5	chr2	180331857	180333857	9.29277	5.04715	0	0.34012	7.16996	0.17006	5.31742
Kcns3	chr12	11149373	11151373	5.90216	1.65261	0	0.17006	3.77738	0.0850301	5.31667
Mdga1	chr17	29887629	29889629	3.64176	1.96526	0	0.121472	2.80351	0.0607358	5.31379
Zbtb46	chr2	181458426	181460426	3.76734	1.83127	0	0.121472	2.7993	0.0607358	5.31163
Zbtb46	chr2	181458426	181460426	3.76734	1.83127	0	0.121472	2.7993	0.0607358	5.31163
Zbtb46	chr2	181458426	181460426	3.76734	1.83127	0	0.121472	2.7993	0.0607358	5.31163
Fam105a	chr15	27680542	27682542	4.5208	2.99256	0	0.17006	3.75668	0.0850301	5.30877
Glis3	chr19	28679077	28681077	11.0509	7.01241	0	0.437298	9.03163	0.218649	5.30538
Glis3	chr19	28679077	28681077	11.0509	7.01241	0	0.437298	9.03163	0.218649	5.30538
Slc7a2	chr8	40861412	40863412	6.40447	3.48387	0.109207	0.121472	4.94417	0.115339	5.30473
Dlx2	chr2	71544950	71546950	12.3066	6.20844	0.109207	0.34012	9.25754	0.224664	5.30352
D130058E05Rik	chr1	89929234	89931234	13.8136	5.62779	0.327622	0.145766	9.72068	0.236694	5.30175
Ntrk1	chr3	87794162	87796162	10.6741	3.97519	0.109207	0.242943	7.32466	0.176075	5.30077
Hoxa3	chr6	52212067	52214067	24.6133	13.4888	0.218415	0.728829	19.0511	0.473622	5.3006
Asic2	chr11	81152321	81154321	9.54392	3.17122	0.109207	0.194354	6.35757	0.151781	5.29863
Slc7a2	chr8	40861396	40863396	6.40447	3.43921	0.109207	0.121472	4.92184	0.115339	5.29821
Pax5	chr4	44703006	44705006	5.14869	3.26055	0	0.194354	4.20462	0.0971772	5.29733
Npas2	chr1	39192731	39194731	3.01387	3.48387	0	0.145766	3.24887	0.0728829	5.29715
Nr5a1	chr2	38711676	38713676	13.4368	6.3871	0.218415	0.267237	9.91197	0.242826	5.29441
Gdf7	chr12	8300954	8302954	17.3298	5.80645	0.109207	0.461592	11.5681	0.2854	5.29259
Nkx6-1	chr5	101664226	101666226	6.65563	2.18859	0.109207	0.0971772	4.42211	0.103192	5.29115
B3gat1	chr9	26732803	26734803	6.65563	2.18859	0.109207	0.0971772	4.42211	0.103192	5.29115
B3gat1	chr9	26732851	26734851	6.65563	2.18859	0.109207	0.0971772	4.42211	0.103192	5.29115
Shox2	chr3	66980390	66982390	7.03236	4.42184	0.0546037	0.218649	5.7271	0.136626	5.29011
Arpp21	chr9	112233841	112235841	9.54392	2.09926	0.109207	0.17006	5.82159	0.139634	5.28438
Mapre2	chr18	23752748	23754748	10.9253	4.73449	0.163811	0.218649	7.82989	0.19123	5.28392
B3gat1	chr9	26732824	26734824	6.65563	2.14392	0.109207	0.0971772	4.39978	0.103192	5.28386
Pax1	chr2	147367282	147369282	3.64176	3.97519	0.0546037	0.121472	3.80847	0.0880376	5.28352
Hoxb8	chr11	96280905	96282905	25.2412	14.0248	0.382226	0.607358	19.633	0.494792	5.28218
Mapre2	chr18	23752725	23754725	10.9253	4.68983	0.163811	0.218649	7.80755	0.19123	5.2798
Slc25a4	chr8	46210284	46212284	15.9484	5.4938	0.218415	0.315826	10.7211	0.26712	5.27514
Zic4	chr9	91367812	91369812	21.9761	8.08437	0.273019	0.485886	15.0303	0.379452	5.27124
Cilp2	chr8	69886687	69888687	18.9623	6.34243	0.273019	0.364415	12.6523	0.318717	5.26756
Hoxd1	chr2	74744674	74746674	24.111	10.0496	0.382226	0.485886	17.0803	0.434056	5.26629
Prrx1	chr1	163312668	163314668	8.5393	3.84119	0.109207	0.194354	6.19025	0.151781	5.26021
Prrx1	chr1	163312671	163314671	8.5393	3.84119	0.109207	0.194354	6.19025	0.151781	5.26021
Prrx1	chr1	163312672	163314672	8.5393	3.84119	0.109207	0.194354	6.19025	0.151781	5.26021
Tmem56	chr3	121262340	121264340	17.3298	6.87841	0.273019	0.34012	12.1041	0.306569	5.25802
Wnt1	chr15	98788857	98790857	25.4923	7.77171	0.43683	0.413003	16.632	0.424916	5.25795
Irx2	chr13	72631597	72633597	18.5855	7.90571	0.382226	0.291532	13.2456	0.336879	5.25603
Duoxa2	chr2	122297900	122299900	9.92066	6.83375	0.0546037	0.364415	8.3772	0.209509	5.25584
Hoxb2	chr11	96339945	96341945	8.79045	5.85112	0	0.364415	7.32079	0.182207	5.25323
Pax5	chr4	44709408	44711408	17.9576	8.88834	0.273019	0.413003	13.423	0.343011	5.24992
Pax5	chr4	44709408	44711408	17.9576	8.88834	0.273019	0.413003	13.423	0.343011	5.24992
Pax5	chr4	44709408	44711408	17.9576	8.88834	0.273019	0.413003	13.423	0.343011	5.24992
Pax5	chr4	44709408	44711408	17.9576	8.88834	0.273019	0.413003	13.423	0.343011	5.24992
Pax5	chr4	44709408	44711408	17.9576	8.88834	0.273019	0.413003	13.423	0.343011	5.24992
Pax5	chr4	44709408	44711408	17.9576	8.88834	0.273019	0.413003	13.423	0.343011	5.24992
Pax5	chr4	44709408	44711408	17.9576	8.88834	0.273019	0.413003	13.423	0.343011	5.24992
Pax5	chr4	44709418	44711418	17.9576	8.88834	0.273019	0.413003	13.423	0.343011	5.24992
Pax5	chr4	44709418	44711418	17.9576	8.88834	0.273019	0.413003	13.423	0.343011	5.24992
Pax5	chr4	44709418	44711418	17.9576	8.88834	0.273019	0.413003	13.423	0.343011	5.24992
Pax5	chr4	44709418	44711418	17.9576	8.88834	0.273019	0.413003	13.423	0.343011	5.24992
Hoxd10	chr2	74673929	74675929	13.9391	8.70968	0.163811	0.413003	11.3244	0.288407	5.24728
Gm960	chr19	4697668	4699668	17.7065	6.96774	0.218415	0.413003	12.3371	0.315709	5.24445
Gfi1	chr5	107725036	107727036	11.5532	7.45906	0	0.485886	9.50611	0.242943	5.23349
Sgk3	chr1	9797130	9799130	10.423	4.64516	0.163811	0.218649	7.53406	0.19123	5.22843
Sgk3	chr1	9797130	9799130	10.423	4.64516	0.163811	0.218649	7.53406	0.19123	5.22843
Tmem56	chr3	121262159	121264159	16.8274	6.87841	0.273019	0.34012	11.8529	0.306569	5.22779
Calcr	chr6	3763654	3765654	4.26965	1.9206	0	0.145766	3.09512	0.0728829	5.22743
Gpr68	chr12	100898498	100900498	7.15794	3.5732	0	0.267237	5.36557	0.133619	5.2261
Nptx1	chr11	119547630	119549630	6.65563	4.28784	0.0546037	0.218649	5.47174	0.136626	5.22442
Oxtr	chr6	112488808	112490808	12.5578	5.40447	0.218415	0.242943	8.98113	0.230679	5.22332
D430041D05Rik	chr2	104409334	104411334	10.0462	3.12655	0.163811	0.17006	6.58639	0.166936	5.22038
D030025P21Rik	chr12	84874769	84876769	15.5717	6.43176	0.109207	0.461592	11.0017	0.2854	5.22023
Hoxd9	chr2	74694601	74696601	35.9153	13.8908	0.273019	1.04466	24.9031	0.658837	5.2191
Lhx8	chr3	154329651	154331651	14.1903	9.15633	0	0.607358	11.6733	0.303679	5.21902
Zic4	chr9	91367894	91369894	20.4692	7.59305	0.273019	0.461592	14.0311	0.367305	5.21778
Sdk1	chr5	141240918	141242918	7.03236	2.94789	0.0546037	0.194354	4.99013	0.124479	5.21651
D430041D05Rik	chr2	104408992	104410992	8.66488	4.4665	0.163811	0.17006	6.56569	0.166936	5.21585
D430041D05Rik	chr2	104408993	104410993	8.66488	4.4665	0.163811	0.17006	6.56569	0.166936	5.21585
Htra1	chr7	130935203	130937203	16.7019	6.11911	0.327622	0.267237	11.4105	0.29743	5.21522
Disc1	chr8	125053230	125055230	6.53005	4.33251	0.0546037	0.218649	5.43128	0.136626	5.21373
Irx5	chr8	92354764	92356764	7.66025	2.27792	0.0546037	0.194354	4.96908	0.124479	5.21043
2001-03-01	chr1	184810313	184812313	4.77196	1.33995	0	0.145766	3.05596	0.0728829	5.20912
Gm960	chr19	4697315	4699315	17.9576	7.90571	0.218415	0.461592	12.9317	0.340003	5.20851
Disc1	chr8	125053195	125055195	6.53005	4.28784	0.0546037	0.218649	5.40895	0.136626	5.2078
Disc1	chr8	125053195	125055195	6.53005	4.28784	0.0546037	0.218649	5.40895	0.136626	5.2078
Disc1	chr8	125053195	125055195	6.53005	4.28784	0.0546037	0.218649	5.40895	0.136626	5.2078
Disc1	chr8	125053195	125055195	6.53005	4.28784	0.0546037	0.218649	5.40895	0.136626	5.2078
Disc1	chr8	125053195	125055195	6.53005	4.28784	0.0546037	0.218649	5.40895	0.136626	5.2078
Disc1	chr8	125053195	125055195	6.53005	4.28784	0.0546037	0.218649	5.40895	0.136626	5.2078
Disc1	chr8	125053209	125055209	6.53005	4.28784	0.0546037	0.218649	5.40895	0.136626	5.2078
Mb21d1	chr9	78442237	78444237	11.5532	7.77171	0.163811	0.34012	9.66244	0.251966	5.20643
Kif26b	chr1	178528125	178530125	8.16256	5.31514	0.0546037	0.291532	6.73885	0.173068	5.20419
Hoxa7	chr6	52217711	52219711	19.8413	9.73698	0.273019	0.51018	14.7891	0.391599	5.20361
Hoxc8	chr15	102989622	102991622	25.9946	13.8015	0.163811	0.898889	19.8981	0.53135	5.20065
Dlk2	chr17	46296483	46298483	12.5578	4.42184	0.273019	0.17006	8.48981	0.221539	5.1981
Oprd1	chr4	132143486	132145486	9.04161	2.8139	0.109207	0.194354	5.92775	0.151781	5.1978
Ghsr	chr3	27370351	27372351	14.6926	6.29777	0.163811	0.388709	10.4952	0.27626	5.19763
Ppm1e	chr11	87358023	87360023	8.5393	1.96526	0	0.267237	5.25228	0.133619	5.19537
Supt3	chr17	44733693	44735693	8.79045	3.93052	0.109207	0.218649	6.36049	0.163928	5.19484
Gnai1	chr5	18359413	18361413	5.27427	2.54591	0	0.194354	3.91009	0.0971772	5.19282
Lhx2	chr2	38340092	38342092	24.6133	8.933	0.218415	0.680241	16.7731	0.449328	5.19134
Cbfa2t3	chr8	122677175	122679175	3.26503	1.87593	0	0.121472	2.57048	0.0607358	5.18905
Pygo1	chr9	72924645	72926645	11.302	4.68983	0.0546037	0.364415	7.99592	0.209509	5.18871
Pparg	chr6	115360221	115362221	5.65101	2.14392	0	0.194354	3.89746	0.0971772	5.18816
Duox2	chr2	122297165	122299165	14.1903	7.77171	0	0.583063	10.981	0.291532	5.18787
Hoxa11	chr6	52247422	52249422	19.8413	8.933	0.382226	0.388709	14.3872	0.385467	5.18608
Aim1	chr10	44003846	44005846	11.5532	4.82382	0.163811	0.267237	8.1885	0.215524	5.184
Ppara	chr15	85733983	85735983	4.5208	2.36725	0	0.17006	3.44403	0.0850301	5.18375
Rnf220	chr4	117494011	117496011	4.5208	2.36725	0	0.17006	3.44403	0.0850301	5.18375
Gpr153	chr4	152281370	152283370	8.41372	4.86849	0.0546037	0.291532	6.6411	0.173068	5.18314
Tal1	chr4	115055426	115057426	17.5809	6.92308	0.218415	0.437298	12.252	0.327856	5.18164
Grm4	chr17	27512341	27514341	9.29277	3.97519	0.0546037	0.291532	6.63398	0.173068	5.1816
Chd5	chr4	152337651	152339651	7.53467	1.96526	0	0.242943	4.74997	0.121472	5.17813
Chd5	chr4	152337651	152339651	7.53467	1.96526	0	0.242943	4.74997	0.121472	5.17813
Gm10545	chr18	37009858	37011858	16.5763	5.40447	0.0546037	0.534475	10.9904	0.294539	5.17478
Pcdhga11	chr18	37741094	37743094	18.3344	10.005	0.109207	0.655946	14.1697	0.382577	5.17471
Mb21d1	chr9	78442204	78444204	11.1764	7.72705	0.163811	0.34012	9.45174	0.251966	5.17466
Hs3st3b1	chr11	63921290	63923290	6.40447	4.6005	0.163811	0.121472	5.50249	0.142641	5.17449
Cdkn2c	chr4	109656608	109658608	13.688	5.62779	0.0546037	0.461592	9.65789	0.258098	5.17237
Vgll2	chr10	52021528	52023528	11.4276	5.22581	0.0546037	0.388709	8.3267	0.221656	5.16942
Hoxb8	chr11	96281725	96283725	17.7065	10.4963	0.327622	0.437298	14.1014	0.38246	5.16817
Alx1	chr10	103028051	103030051	9.29277	3.39454	0.163811	0.17006	6.34365	0.166936	5.16629
Dlk2	chr17	46296421	46298421	12.1811	4.42184	0.273019	0.17006	8.30145	0.221539	5.16577
Six3	chr17	85619914	85621914	14.6926	4.51117	0.273019	0.242943	9.60189	0.257981	5.16462
Hoxb9	chr11	96260610	96262610	13.0601	7.01241	0.273019	0.267237	10.0363	0.270128	5.16443
Obscn	chr11	59135375	59137375	9.92066	4.91315	0.0546037	0.34012	7.4169	0.197362	5.16254
Obscn	chr11	59135375	59137375	9.92066	4.91315	0.0546037	0.34012	7.4169	0.197362	5.16254
Obscn	chr11	59135375	59137375	9.92066	4.91315	0.0546037	0.34012	7.4169	0.197362	5.16254
Osr1	chr12	9573442	9575442	19.4646	8.39702	0.273019	0.485886	13.9308	0.379452	5.16172
Neurog2	chr3	127632136	127634136	11.1764	4.28784	0.218415	0.194354	7.73214	0.206385	5.16106
Fzd3	chr14	65261463	65263463	6.90679	3.34988	0	0.267237	5.12833	0.133619	5.16098
Hoxd9	chr2	74694520	74696520	35.7897	13.8908	0.327622	1.04466	24.8403	0.686139	5.15774
Penk	chr4	4137477	4139477	4.89754	5.76179	0.109207	0.17006	5.32966	0.139634	5.15724
Kcnk15	chr2	163852733	163854733	8.79045	3.17122	0	0.315826	5.98084	0.157913	5.15697
Elfn2	chr15	78717113	78719113	7.91141	3.39454	0.0546037	0.242943	5.65298	0.148773	5.15652
3110047P20Rik	chr5	63648451	63650451	8.03699	3.26055	0.0546037	0.242943	5.64877	0.148773	5.15545
Adra1b	chr11	43835332	43837332	4.39523	1.9206	0.109207	0.0485886	3.15791	0.078898	5.15524
Adra1b	chr11	43835332	43837332	4.39523	1.9206	0.109207	0.0485886	3.15791	0.078898	5.15524
Vgll2	chr10	52021502	52023502	11.302	5.18114	0.0546037	0.388709	8.24158	0.221656	5.15461
Sphk1	chr11	116532251	116534251	10.1718	7.81638	0	0.485886	8.9941	0.242943	5.1537
3110047P20Rik	chr5	63648103	63650103	7.53467	2.85856	0.0546037	0.218649	5.19662	0.136626	5.15013
Parp10	chr15	76231045	76233045	8.5393	3.34988	0	0.315826	5.94459	0.157913	5.14822
Atf3	chr1	191182340	191184340	3.26503	2.59057	0	0.145766	2.9278	0.0728829	5.14752
Pcsk5	chr19	17836632	17838632	4.14407	0.848635	0	0.121472	2.49635	0.0607358	5.14701
Pcsk5	chr19	17836632	17838632	4.14407	0.848635	0	0.121472	2.49635	0.0607358	5.14701
Ush1g	chr11	115321041	115323041	14.1903	5.71712	0.109207	0.437298	9.95371	0.273252	5.13652
Dtx1	chr5	120694403	120696403	10.9253	6.78908	0	0.485886	8.85718	0.242943	5.13159
Gfi1	chr5	107724805	107726805	7.91141	5.53846	0	0.364415	6.72494	0.182207	5.13093
Gfi1	chr5	107724805	107726805	7.91141	5.53846	0	0.364415	6.72494	0.182207	5.13093
Aard	chr15	52039107	52041107	8.66488	3.08189	0	0.315826	5.87338	0.157913	5.13086
Duoxa1	chr2	122312730	122314730	8.66488	7.32506	0	0.437298	7.99497	0.218649	5.12969
Kcnj4	chr15	79504241	79506241	11.302	4.24318	0.109207	0.315826	7.77259	0.212517	5.12827
Fads3	chr19	10040548	10042548	4.5208	2.09926	0	0.17006	3.31003	0.0850301	5.12667
Six3	chr17	85620031	85622031	12.6834	4.10918	0.218415	0.242943	8.39628	0.230679	5.12628
Sphk1	chr11	116532268	116534268	9.92066	7.72705	0	0.485886	8.82385	0.242943	5.12616
Duoxa1	chr2	122312693	122314693	8.66488	7.2804	0	0.437298	7.97264	0.218649	5.12566
Gm10545	chr18	37004320	37006320	5.77658	2.94789	0.109207	0.121472	4.36224	0.115339	5.12446
Nags	chr11	102145366	102147366	10.5485	5.3598	0.218415	0.218649	7.95417	0.218532	5.12306
Hoxc10	chr15	102965796	102967796	12.6834	5.53846	0.163811	0.34012	9.11092	0.251966	5.12173
Hoxb7	chr11	96287715	96289715	19.9669	7.95037	0.491433	0.291532	13.9586	0.391483	5.12071
Bcl3	chr7	19821770	19823770	14.0647	3.93052	0.109207	0.388709	8.99762	0.248958	5.12036
Bcl3	chr7	19821770	19823770	14.0647	3.93052	0.109207	0.388709	8.99762	0.248958	5.12036
Lhx6	chr2	36102592	36104592	16.8274	6.43176	0.163811	0.485886	11.6296	0.324849	5.11939
Wnt7b	chr15	85579729	85581729	7.66025	4.33251	0.109207	0.218649	5.99638	0.163928	5.10993
Gfra1	chr19	58453592	58455592	11.302	4.24318	0.163811	0.267237	7.77259	0.215524	5.1089
Sdk2	chr11	114066029	114068029	9.6695	2.50124	0.163811	0.17006	6.08537	0.166936	5.10642
Nfatc1	chr18	80707173	80709173	8.16256	3.17122	0.163811	0.145766	5.66689	0.154788	5.10641
Nfatc1	chr18	80707173	80709173	8.16256	3.17122	0.163811	0.145766	5.66689	0.154788	5.10641
Lhx6	chr2	36103060	36105060	18.46	7.05707	0.163811	0.558769	12.7585	0.36129	5.1039
Lhx6	chr2	36103060	36105060	18.46	7.05707	0.163811	0.558769	12.7585	0.36129	5.1039
Ppp1r1b	chr11	98347404	98349404	10.9253	5.58313	0.218415	0.242943	8.2542	0.230679	5.10169
Thpo	chr16	20733511	20735511	7.91141	3.17122	0.109207	0.194354	5.54131	0.151781	5.10072
Dlk2	chr17	46296928	46298928	12.9345	3.97519	0.327622	0.145766	8.45486	0.236694	5.10069
Hoxb8	chr11	96281556	96283556	17.0786	9.82631	0.327622	0.437298	13.4525	0.38246	5.10025
Kcnk15	chr2	163852651	163854651	8.41372	3.08189	0	0.315826	5.7478	0.157913	5.09973
Gata2	chr6	88197664	88199664	12.9345	7.45906	0.163811	0.413003	10.1968	0.288407	5.0961
Npr2	chr4	43631185	43633185	10.5485	2.14392	0.109207	0.242943	6.34623	0.176075	5.09421
Nrbp2	chr15	76089013	76091013	14.6926	7.32506	0.163811	0.461592	11.0088	0.312701	5.09363
Hoxd3	chr2	74738619	74740619	28.255	13.2208	0.491433	0.704535	20.7379	0.597984	5.09279
Gpr68	chr12	100898524	100900524	7.15794	3.43921	0	0.291532	5.29857	0.145766	5.09087
Gpr68	chr12	100898524	100900524	7.15794	3.43921	0	0.291532	5.29857	0.145766	5.09087
Pitx2	chr3	129198878	129200878	5.52543	2.54591	0	0.218649	4.03567	0.109324	5.08342
Pitx2	chr3	129198878	129200878	5.52543	2.54591	0	0.218649	4.03567	0.109324	5.08342
Hoxa7	chr6	52220854	52222854	29.3852	14.8735	0.655245	0.631652	22.1293	0.643448	5.0824
Nab2	chr10	127664481	127666481	11.302	5.76179	0	0.485886	8.5319	0.242943	5.07767
Adcy1	chr11	7062489	7064489	10.5485	1.7866	0.273019	0.0728829	6.16757	0.172951	5.07751
Bcl3	chr7	19821157	19823157	12.6834	3.75186	0.0546037	0.413003	8.21762	0.233803	5.07668
Foxa2	chr2	148039203	148041203	14.0647	5.22581	0.163811	0.388709	9.64527	0.27626	5.07592
Grm8	chr6	28132129	28134129	8.03699	3.26055	0	0.315826	5.64877	0.157913	5.0747
Obscn	chr11	59135402	59137402	9.04161	4.91315	0.0546037	0.34012	6.97738	0.197362	5.07453
Spsb1	chr4	149954031	149956031	5.39985	3.43921	0	0.242943	4.41953	0.121472	5.07433
Chd5	chr4	152337887	152339887	6.78121	2.05459	0	0.242943	4.4179	0.121472	5.0738
Glis3	chr19	28678666	28680666	12.9345	8.1737	0	0.607358	10.5541	0.303679	5.07374
Hoxc12	chr15	102935757	102937757	28.0039	12.4615	0.382226	0.801712	20.2327	0.591969	5.07157
Ovol1	chr19	5559575	5561575	9.16719	4.33251	0.163811	0.218649	6.74985	0.19123	5.07007
Nbl1	chr4	139091106	139093106	6.2789	3.34988	0	0.267237	4.81439	0.133619	5.07003
Matn4	chr2	164404160	164406160	13.9391	4.73449	0.273019	0.267237	9.33682	0.270128	5.06032
Spsb1	chr4	149954043	149956043	5.39985	3.34988	0	0.242943	4.37486	0.121472	5.05971
Spsb1	chr4	149954043	149956043	5.39985	3.34988	0	0.242943	4.37486	0.121472	5.05971
Slc22a21	chr11	53978870	53980870	3.26503	1.42928	0	0.121472	2.34715	0.0607358	5.05846
Pou4f1	chr14	104466991	104468991	9.29277	5.09181	0.218415	0.194354	7.19229	0.206385	5.05679
Mesp1	chr7	79792788	79794788	5.14869	2.76923	0	0.218649	3.95896	0.109324	5.0558
Fat4	chr3	38885940	38887940	3.3906	2.09926	0	0.145766	2.74493	0.0728829	5.0548
Cyp26a1	chr19	37696808	37698808	12.5578	5.58313	0.382226	0.145766	9.07046	0.263996	5.05054
Sp5	chr2	70473923	70475923	6.90679	5.00248	0	0.34012	5.95463	0.17006	5.04988
Zeb1	chr18	5592602	5594602	14.567	4.95782	0.327622	0.242943	9.76243	0.285283	5.04855
Myod1	chr7	46375474	46377474	8.28814	4.19851	0.163811	0.194354	6.24333	0.179083	5.04753
Prr18	chr17	8339739	8341739	8.66488	2.8139	0.109207	0.218649	5.73939	0.163928	5.04685
Pax6	chr2	105670860	105672860	13.0601	7.23573	0.109207	0.485886	10.1479	0.297547	5.04566
Prrt1	chr17	34630404	34632404	12.1811	4.28784	0.163811	0.315826	8.23445	0.239819	5.04447
Wnt10b	chr15	98777150	98779150	8.41372	4.42184	0.0546037	0.315826	6.41778	0.185215	5.04119
Foxa2	chr2	148044464	148046464	9.79508	6.02978	0.218415	0.242943	7.91243	0.230679	5.04076
Barx1	chr13	48661998	48663998	11.6787	4.33251	0.273019	0.194354	8.00563	0.233686	5.03972
Pcdhga11	chr18	37805410	37807410	12.3066	7.90571	0.109207	0.485886	10.1062	0.297547	5.03971
Prrx1	chr1	163312710	163314710	8.79045	4.42184	0.163811	0.218649	6.60615	0.19123	5.03907
Gm1564	chr11	102664623	102666623	14.567	6.02978	0.218415	0.388709	10.2984	0.303562	5.03893
Duoxa1	chr2	122312644	122314644	8.03699	6.96774	0	0.437298	7.50237	0.218649	5.03806
Duoxa1	chr2	122312651	122314651	8.03699	6.96774	0	0.437298	7.50237	0.218649	5.03806
Pax5	chr4	44709685	44711685	15.8228	8.08437	0.273019	0.437298	11.9536	0.355158	5.03399
Znrf4	chr17	56511483	56513483	13.688	6.02978	0.43683	0.145766	9.85889	0.291298	5.03363
Sdk2	chr11	114066046	114068046	9.79508	2.54591	0.163811	0.194354	6.17049	0.179083	5.03063
Fzd3	chr14	65261391	65263391	5.39985	3.17122	0	0.242943	4.28553	0.121472	5.03002
Wt1	chr2	105125529	105127529	6.53005	3.61787	0	0.291532	5.07396	0.145766	5.0285
Hoxd1	chr2	74761980	74763980	10.6741	6.3871	0.163811	0.34012	8.53061	0.251966	5.02689
3110047P20Rik	chr5	63648340	63650340	7.91141	3.17122	0.0546037	0.267237	5.54131	0.160921	5.02143
Cd274	chr19	29366455	29368455	5.14869	1.7866	0	0.194354	3.46765	0.0971772	5.02004
Ascl1	chr10	87492660	87494660	5.65101	2.85856	0	0.242943	4.25478	0.121472	5.01965
Dock3	chr9	107230582	107232582	8.41372	4.82382	0	0.388709	6.61877	0.194354	5.0196
Nr4a3	chr4	48050248	48052248	17.0786	9.33499	0.163811	0.631652	13.2068	0.397732	5.01861
Vax1	chr19	59165980	59167980	12.4322	6.83375	0.382226	0.194354	9.63298	0.28829	5.01469
Ddx43	chr9	78394777	78396777	16.8274	7.1464	0.382226	0.34012	11.9869	0.361173	5.01443
Gfra1	chr19	58453466	58455466	11.5532	4.55583	0.163811	0.315826	8.0545	0.239819	5.01263
Zic4	chr9	91367970	91369970	17.3298	6.96774	0.273019	0.461592	12.1487	0.367305	5.01012
Gm1564	chr11	102664588	102666588	14.8182	6.07444	0.218415	0.413003	10.4463	0.315709	5.00465
Pth2	chr7	45179995	45181995	14.6926	6.3871	0.273019	0.364415	10.5399	0.318717	5.00424
Hoxa6	chr6	52207722	52209722	17.4553	9.82631	0.491433	0.34012	13.6408	0.415777	5.00275
Htr7	chr19	36056340	36058340	6.15332	2.05459	0.163811	0.0728829	4.10395	0.118347	5.0024
Tbx4	chr11	85885422	85887422	13.1857	3.75186	0.218415	0.291532	8.46877	0.254973	4.99994
Msx3	chr7	140048140	140050140	13.9391	9.201	0.218415	0.485886	11.5701	0.35215	4.99891
9230102O04Rik	chr2	9886784	9888784	10.0462	7.45906	0.163811	0.364415	8.75265	0.264113	4.99852
Kcnq5	chr1	21960581	21962581	2.13482	2.36725	0	0.121472	2.25104	0.0607358	4.9984
Vwc2	chr11	11113223	11115223	8.66488	6.11911	0.0546037	0.388709	7.39199	0.221656	4.99786
Rasd2	chr8	75212944	75214944	4.14407	2.6799	0	0.194354	3.41199	0.0971772	4.99676
Btbd17	chr11	114786903	114788903	9.54392	3.48387	0	0.388709	6.5139	0.194354	4.99659
Irx5	chr8	92356796	92358796	9.04161	4.55583	0.163811	0.242943	6.79872	0.203377	4.99591
Slc7a2	chr8	40861578	40863578	7.91141	3.7072	0.273019	0.0728829	5.8093	0.172951	4.99132
Hoxb13	chr11	96193316	96195316	12.6834	4.73449	0.163811	0.364415	8.70893	0.264113	4.99131
Ebf2	chr14	67233644	67235644	9.16719	5.53846	0.0546037	0.388709	7.35283	0.221656	4.9902
Irx2	chr13	72628825	72630825	11.6787	5.71712	0.382226	0.145766	8.69793	0.263996	4.9901
Hoxd8	chr2	74710929	74712929	11.1764	4.4665	0.109207	0.364415	7.82147	0.236811	4.9878
Hoxd8	chr2	74710929	74712929	11.1764	4.4665	0.109207	0.364415	7.82147	0.236811	4.9878
Hoxd10	chr2	74690090	74692090	18.46	9.29033	0.273019	0.583063	13.8751	0.428041	4.98633
Lhx9	chr1	138846579	138848579	9.92066	2.8139	0.163811	0.218649	6.36728	0.19123	4.98602
Sfrp1	chr8	23410502	23412502	13.8136	4.10918	0.327622	0.218649	8.96138	0.273136	4.98576
Cbfa2t3	chr8	122677072	122679072	3.26503	1.96526	0	0.145766	2.61514	0.0728829	4.98518
Hmga1	chr17	27555620	27557620	1.38136	0	0	0.0242943	0.690679	0.0121472	4.98356
Hmga1	chr17	27555623	27557623	1.38136	0	0	0.0242943	0.690679	0.0121472	4.98356
Hmga1	chr17	27555641	27557641	1.38136	0	0	0.0242943	0.690679	0.0121472	4.98356
Ush1g	chr11	115321925	115323925	18.2088	7.72705	0.218415	0.583063	12.9679	0.400739	4.98169
Msx3	chr7	140048088	140050088	13.688	9.15633	0.218415	0.485886	11.4222	0.35215	4.98037
Hoxd10	chr2	74678392	74680392	13.4368	8.44169	0.163811	0.51018	10.9393	0.336996	4.97977
Ppp3cc	chr14	70288449	70290449	11.5532	3.61787	0	0.461592	7.58552	0.230796	4.97927
Robo3	chr9	37429134	37431134	10.1718	3.43921	0	0.413003	6.80551	0.206502	4.97637
Robo3	chr9	37429134	37431134	10.1718	3.43921	0	0.413003	6.80551	0.206502	4.97637
Foxa1	chr12	57545121	57547121	5.52543	1.96526	0	0.218649	3.74534	0.109324	4.97598
Pitx2	chr3	129198922	129200922	5.52543	2.72457	0	0.242943	4.125	0.121472	4.97506
Dlgap2	chr8	14094875	14096875	13.3113	5.04715	0.273019	0.291532	9.1792	0.282275	4.97454
Msx2	chr13	53472074	53474074	12.3066	8.53102	0.109207	0.534475	10.4188	0.321841	4.97394
Esrrg	chr1	187608696	187610696	10.7997	5.44913	0.109207	0.388709	8.12442	0.248958	4.97325
Cbfa2t3	chr8	122677111	122679111	3.26503	1.9206	0	0.145766	2.59281	0.0728829	4.97285
Sh3rf3	chr10	58813059	58815059	9.79508	4.91315	0.109207	0.34012	7.35412	0.224664	4.97184
Sphk1	chr11	116531925	116533925	11.1764	8.48635	0	0.607358	9.83139	0.303679	4.9715
Dlgap2	chr8	14094865	14096865	13.3113	5.00248	0.273019	0.291532	9.15687	0.282275	4.97103
Sp9	chr2	73270966	73272966	21.4738	10.5409	0.491433	0.51018	16.0074	0.500807	4.97072
Plxna4	chr6	32587192	32589192	8.66488	3.17122	0.163811	0.194354	5.91805	0.179083	4.97047
Slc13a5	chr11	72265421	72267421	2.13482	1.51861	0	0.0971772	1.82672	0.0485886	4.97037
Asic4	chr1	75449699	75451699	6.15332	2.8139	0	0.267237	4.48361	0.133619	4.96756
Tmem200b	chr4	131920771	131922771	3.51618	1.07196	0.0546037	0.0728829	2.29407	0.0637433	4.96553
A830073O21Rik	chr7	73739917	73741917	7.03236	3.43921	0	0.315826	5.23579	0.157913	4.96537
Runx3	chr4	135152505	135154505	6.78121	3.48387	0.163811	0.145766	5.13254	0.154788	4.96379
Fbn2	chr18	58208926	58210926	5.77658	2.59057	0.0546037	0.194354	4.18358	0.124479	4.96273
Aldh1a3	chr7	66425589	66427589	6.53005	2.59057	0.0546037	0.218649	4.56031	0.136626	4.96208
Adamts9	chr6	92942492	92944492	3.89292	1.25062	0	0.145766	2.57177	0.0728829	4.96114
Adamts9	chr6	92942492	92944492	3.89292	1.25062	0	0.145766	2.57177	0.0728829	4.96114
Gfra1	chr19	58453620	58455620	10.6741	4.10918	0.163811	0.291532	7.39165	0.227671	4.96081
Cbln2	chr18	86710520	86712520	4.01849	2.8139	0.0546037	0.145766	3.41619	0.100185	4.95861
Gm16140	chr11	18871155	18873155	8.91603	4.33251	0.163811	0.242943	6.62427	0.203377	4.95846
Dlk2	chr17	46297083	46299083	11.302	3.21588	0.327622	0.121472	7.25895	0.224547	4.9538
Pitx2	chr3	129198926	129200926	5.39985	2.72457	0	0.242943	4.06221	0.121472	4.95299
Epha7	chr4	28812326	28814326	2.13482	1.47395	0	0.0971772	1.80439	0.0485886	4.95272
Foxd1	chr13	98353245	98355245	12.6834	4.82382	0.109207	0.437298	8.7536	0.273252	4.95136
Slc25a4	chr8	46210030	46212030	9.6695	2.94789	0.218415	0.17006	6.3087	0.194237	4.95131
Hoxb5	chr11	96297955	96299955	22.9808	13.6675	0.43683	0.728829	18.3241	0.582829	4.95077
Paqr6	chr3	88365722	88367722	5.65101	1.87593	0.0546037	0.17006	3.76347	0.112332	4.94702
Hoxd8	chr2	74704152	74706152	5.02312	2.85856	0.163811	0.0728829	3.94084	0.118347	4.94404
Rasl10a	chr11	5057128	5059128	12.3066	3.97519	0.218415	0.291532	8.14091	0.254973	4.94304
Tifa	chr3	127788872	127790872	12.0555	4.37717	0.273019	0.242943	8.21633	0.257981	4.94005
Necab2	chr8	119445761	119447761	5.77658	1.51861	0	0.218649	3.6476	0.109324	4.93794
Wnt7a	chr6	91410363	91412363	8.03699	3.34988	0.109207	0.242943	5.69343	0.176075	4.93787
Kcnq5	chr1	21960665	21962665	2.51156	2.54591	0	0.145766	2.52873	0.0728829	4.93689
Cd274	chr19	29366308	29368308	5.27427	2.00993	0	0.218649	3.6421	0.109324	4.93577
Lmx1b	chr2	33639480	33641480	8.91603	4.10918	0.163811	0.242943	6.51261	0.203377	4.93397
Htra1	chr7	130935111	130937111	15.1949	6.16377	0.43683	0.242943	10.6794	0.339886	4.93314
Sp9	chr2	73270925	73272925	20.7204	10.407	0.491433	0.51018	15.5637	0.500807	4.93019
Opcml	chr9	27789947	27791947	7.78583	3.34988	0.0546037	0.291532	5.56785	0.173068	4.92926
Klf4	chr4	55531453	55533453	3.01387	2.00993	0	0.145766	2.5119	0.0728829	4.92729
Klf4	chr4	55531466	55533466	3.01387	2.00993	0	0.145766	2.5119	0.0728829	4.92729
Lhx1	chr11	84521711	84523711	14.0647	9.24566	0.163811	0.583063	11.6552	0.373437	4.92708
Htr7	chr19	36056360	36058360	5.77658	2.00993	0.163811	0.0728829	3.89326	0.118347	4.92656
Htr7	chr19	36056360	36058360	5.77658	2.00993	0.163811	0.0728829	3.89326	0.118347	4.92656
Nr3c2	chr8	76898985	76900985	6.65563	2.05459	0	0.267237	4.35511	0.133619	4.9257
Sox6	chr7	116037744	116039744	11.4276	6.87841	0	0.583063	9.153	0.291532	4.92544
Stxbp2	chr8	3629955	3631955	4.77196	0.982631	0	0.17006	2.8773	0.0850301	4.92519
Vipr1	chr9	121641716	121643716	5.77658	3.66253	0	0.291532	4.71956	0.145766	4.92425
Lrg1	chr17	56120946	56122946	18.46	9.02233	0.327622	0.558769	13.7411	0.443196	4.92327
Efhd1	chr1	87263363	87265363	4.89754	3.97519	0.0546037	0.218649	4.43636	0.136626	4.92241
Efhd1	chr1	87263363	87265363	4.89754	3.97519	0.0546037	0.218649	4.43636	0.136626	4.92241
Susd4	chr1	182763012	182765012	2.63714	0.8933	0	0.0971772	1.76522	0.0485886	4.92123
Htr7	chr19	36056507	36058507	4.89754	1.38462	0.163811	0.0242943	3.14108	0.0940527	4.92046
Hoxd1	chr2	74751684	74753684	12.9345	7.50372	0.218415	0.437298	10.2191	0.327856	4.92013
Foxl2	chr9	98954607	98956607	3.89292	3.30521	0	0.218649	3.59906	0.109324	4.91866
Alx1	chr10	103027777	103029777	10.7997	5.18114	0.218415	0.291532	7.99042	0.254973	4.91616
Ptger1	chr8	83665833	83667833	9.79508	3.43921	0.0546037	0.364415	6.61714	0.209509	4.91603
Ptger1	chr8	83665863	83667863	9.79508	3.43921	0.0546037	0.364415	6.61714	0.209509	4.91603
3110039M20Rik	chr12	49389659	49391659	16.3251	6.61042	0.327622	0.413003	11.4678	0.370313	4.91551
Kl	chr5	150951607	150953607	6.40447	4.06452	0.109207	0.218649	5.2345	0.163928	4.91424
Grem1	chr2	113757646	113759646	7.53467	3.66253	0.109207	0.242943	5.5986	0.176075	4.91368
Btbd17	chr11	114786945	114788945	9.54392	3.48387	0	0.413003	6.5139	0.206502	4.91328
Egr4	chr6	85512589	85514589	5.52543	3.84119	0	0.291532	4.68331	0.145766	4.91316
Mdga1	chr17	29886882	29888882	6.65563	3.61787	0.0546037	0.267237	5.13675	0.160921	4.91226
Cd274	chr19	29366390	29368390	5.14869	2.00993	0	0.218649	3.57931	0.109324	4.91075
Lbx2	chr6	83086338	83088338	9.6695	5.85112	0.109207	0.388709	7.76031	0.248958	4.90718
4833424O15Rik	chr3	117574227	117576227	3.51618	1.42928	0	0.145766	2.47273	0.0728829	4.90471
Grm8	chr6	28132325	28134325	6.40447	2.90323	0	0.291532	4.65385	0.145766	4.90407
Oplah	chr15	76306101	76308101	5.65101	1.65261	0.0546037	0.17006	3.65181	0.112332	4.90368
Foxb1	chr9	69759940	69761940	7.91141	3.75186	0.0546037	0.315826	5.83164	0.185215	4.90324
Kcnq4	chr4	120747612	120749612	11.4276	6.02978	0.0546037	0.51018	8.72868	0.282392	4.90144
Tesc	chr5	118026870	118028870	6.15332	2.76923	0.109207	0.17006	4.46127	0.139634	4.90118
0610040J01Rik	chr5	63811495	63813495	5.27427	2.00993	0.0546037	0.17006	3.6421	0.112332	4.89985
Lhx8	chr3	154329097	154331097	12.3066	7.81638	0	0.655946	10.0615	0.327973	4.89723
Ly6h	chr15	75565632	75567632	9.16719	3.17122	0.0546037	0.34012	6.1692	0.197362	4.8972
Adm	chr7	110626669	110628669	9.92066	6.02978	0.0546037	0.461592	7.97522	0.258098	4.8965
Fibcd1	chr2	31845005	31847005	4.89754	3.08189	0.0546037	0.194354	3.98971	0.124479	4.89444
Ptpn5	chr7	47131717	47133717	7.4091	3.61787	0.109207	0.242943	5.51348	0.176075	4.89162
Tifa	chr3	127788914	127790914	12.1811	4.42184	0.273019	0.267237	8.30145	0.270128	4.89094
Tifa	chr3	127788916	127790916	12.1811	4.42184	0.273019	0.267237	8.30145	0.270128	4.89094
Dbx1	chr7	49635849	49637849	11.5532	5.22581	0.109207	0.437298	8.38949	0.273252	4.89014
Osmr	chr15	6873296	6875296	4.77196	1.74194	0.0546037	0.145766	3.25695	0.100185	4.88995
Hoxd10	chr2	74682446	74684446	17.7065	5.53846	0.546037	0.218649	11.6225	0.382343	4.8899
Pou4f2	chr8	78435645	78437645	12.0555	5.58313	0.163811	0.413003	8.8193	0.288407	4.88695
Kcnh3	chr15	99223976	99225976	7.4091	3.03722	0.163811	0.17006	5.22316	0.166936	4.88639
Pax6	chr2	105684136	105686136	23.9854	10.139	0.382226	0.753123	17.0622	0.567675	4.88525
Grb10	chr11	12036401	12038401	4.01849	1.20596	0.109207	0.0485886	2.61222	0.078898	4.8825
Ly6h	chr15	75565648	75567648	9.04161	3.17122	0.0546037	0.34012	6.10641	0.197362	4.88246
Ly6h	chr15	75565648	75567648	9.04161	3.17122	0.0546037	0.34012	6.10641	0.197362	4.88246
Nptx1	chr11	119546753	119548753	7.15794	4.51117	0.109207	0.267237	5.83455	0.188222	4.8819
Kdelr3	chr15	79515408	79517408	10.5485	3.61787	0	0.461592	7.08321	0.230796	4.88056
Osmr	chr15	6873257	6875257	4.77196	1.69727	0.0546037	0.145766	3.23462	0.100185	4.88005
Osmr	chr15	6873268	6875268	4.77196	1.69727	0.0546037	0.145766	3.23462	0.100185	4.88005
Htr7	chr19	36056368	36058368	5.52543	2.00993	0.163811	0.0728829	3.76768	0.118347	4.87938
Inhbb	chr1	119421248	119423248	8.16256	2.94789	0.163811	0.194354	5.55523	0.179083	4.87935
Il6ra	chr3	89912162	89914162	6.15332	1.56328	0	0.242943	3.8583	0.121472	4.87888
Gm6434	chr7	25881407	25883407	7.78583	2.76923	0.218415	0.121472	5.27753	0.169943	4.87698
Kcnc1	chr7	46396648	46398648	6.53005	2.23325	0.109207	0.17006	4.38165	0.139634	4.87526
Zeb1	chr18	5592861	5594861	14.4415	5.18114	0.382226	0.267237	9.8113	0.324732	4.87484
Tesc	chr5	118026765	118028765	5.90216	2.85856	0.109207	0.17006	4.38036	0.139634	4.87483
Irf5	chr6	29528282	29530282	11.5532	4.15385	0.0546037	0.461592	7.85351	0.258098	4.87434
B3gat2	chr1	23760753	23762753	11.9299	5.71712	0.218415	0.364415	8.82351	0.291415	4.87317
Nrip3	chr7	109781025	109783025	10.0462	2.76923	0.0546037	0.364415	6.40773	0.209509	4.86971
Kbtbd11	chr8	15010025	15012025	9.41834	3.93052	0	0.437298	6.67443	0.218649	4.8696
Wnt6	chr1	74770892	74772892	6.53005	3.61787	0.109207	0.218649	5.07396	0.163928	4.86939
Nkx2-1	chr12	56535908	56537908	15.3205	6.16377	0.327622	0.388709	10.7421	0.358166	4.86813
Satb2	chr1	56977650	56979650	13.9391	5.58313	0.382226	0.267237	9.76114	0.324732	4.86745
3110039M20Rik	chr12	49388652	49390652	13.1857	5.98511	0.273019	0.364415	9.5854	0.318717	4.86743
Gpr156	chr16	37915496	37917496	5.27427	3.08189	0	0.267237	4.17808	0.133619	4.86597
Dio3	chr12	110278260	110280260	8.91603	4.19851	0.382226	0.0485886	6.55727	0.215407	4.86469
Npr2	chr4	43630935	43632935	6.78121	1.74194	0.0546037	0.218649	4.26157	0.136626	4.86455
Cyp1b1	chr17	79714041	79716041	6.53005	3.93052	0	0.34012	5.23029	0.17006	4.8631
Neurod1	chr2	79455785	79457785	9.29277	4.51117	0.163811	0.291532	6.90197	0.227671	4.86206
Smarcd3	chr5	24597938	24599938	7.15794	4.68983	0	0.388709	5.92388	0.194354	4.85983
Chrd	chr16	20732127	20734127	4.14407	2.05459	0	0.194354	3.09933	0.0971772	4.85853
Chrd	chr16	20732127	20734127	4.14407	2.05459	0	0.194354	3.09933	0.0971772	4.85853
Chrd	chr16	20732127	20734127	4.14407	2.05459	0	0.194354	3.09933	0.0971772	4.85853
Man1c1	chr4	134702767	134704767	2.51156	1.56328	0	0.121472	2.03742	0.0607358	4.85522
Ccser1	chr6	61179324	61181324	4.5208	2.00993	0.109207	0.0971772	3.26537	0.103192	4.85481
Hoxc9	chr15	102976032	102978032	13.0601	8.39702	0.163811	0.558769	10.7286	0.36129	4.85411
Oplah	chr15	76306245	76308245	5.52543	1.51861	0.0546037	0.17006	3.52202	0.112332	4.85162
Mapt	chr11	104230573	104232573	6.40447	2.90323	0.109207	0.194354	4.65385	0.151781	4.84941
Mapt	chr11	104230579	104232579	6.40447	2.90323	0.109207	0.194354	4.65385	0.151781	4.84941
Mapt	chr11	104230581	104232581	6.40447	2.90323	0.109207	0.194354	4.65385	0.151781	4.84941
Mapt	chr11	104230584	104232584	6.40447	2.90323	0.109207	0.194354	4.65385	0.151781	4.84941
Gbx1	chr5	24526276	24528276	6.2789	2.50124	0.163811	0.121472	4.39007	0.142641	4.84931
Sgcd	chr11	47987969	47989969	3.89292	3.48387	0.163811	0.0728829	3.68839	0.118347	4.84878
Prdm8	chr5	98179869	98181869	13.688	7.32506	0.273019	0.437298	10.5065	0.355158	4.84799
Col2a1	chr15	98003635	98005635	3.26503	2.18859	0	0.17006	2.72681	0.0850301	4.84797
Pax5	chr4	44702413	44704413	5.77658	3.17122	0	0.291532	4.4739	0.145766	4.8473
Pcdh10	chr3	45377398	45379398	13.0601	4.6005	0.327622	0.267237	8.8303	0.29743	4.84577
Pcdh10	chr3	45377398	45379398	13.0601	4.6005	0.327622	0.267237	8.8303	0.29743	4.84577
Pcdh10	chr3	45377398	45379398	13.0601	4.6005	0.327622	0.267237	8.8303	0.29743	4.84577
Gp1bb	chr16	18621403	18623403	21.725	11.7916	0.709848	0.437298	16.7583	0.573573	4.84468
Tbx2	chr11	85831209	85833209	4.64638	3.93052	0.109207	0.17006	4.28845	0.139634	4.84431
2001-03-01	chr1	184810197	184812197	5.65101	1.33995	0.0546037	0.17006	3.49548	0.112332	4.84074
Rusc2	chr4	43380979	43382979	9.92066	3.48387	0.109207	0.34012	6.70226	0.224664	4.83813
Ly6h	chr15	75565657	75567657	8.66488	3.17122	0.0546037	0.34012	5.91805	0.197362	4.83733
Nrn1	chr13	36729668	36731668	16.1996	7.41439	0.273019	0.534475	11.807	0.403747	4.83597
Hspa2	chr12	76403176	76405176	8.03699	2.90323	0	0.364415	5.47011	0.182207	4.83347
Uncx	chr5	139542494	139544494	6.2789	3.61787	0.109207	0.218649	4.94838	0.163928	4.83331
Bai1	chr15	74515196	74517196	14.6926	5.40447	0.273019	0.413003	10.0485	0.343011	4.83256
Fignl2	chr15	101053399	101055399	9.16719	5.04715	0.163811	0.315826	7.10717	0.239819	4.83235
Penk	chr4	4137819	4139819	7.15794	6.69975	0.273019	0.194354	6.92885	0.233686	4.8316
Ddn	chr15	98806925	98808925	8.5393	5.4938	0.109207	0.364415	7.01655	0.236811	4.83134
Htr7	chr19	36056373	36058373	5.27427	2.00993	0.163811	0.0728829	3.6421	0.118347	4.8306
Gata2	chr6	88192891	88194891	16.8274	5.13648	0.43683	0.315826	10.982	0.376328	4.83048
Mn1	chr5	111416442	111418442	4.89754	1.51861	0.109207	0.0971772	3.20807	0.103192	4.82935
Lin7a	chr10	107270843	107272843	2.63714	2.05459	0	0.145766	2.34586	0.0728829	4.82904
Lin7a	chr10	107270843	107272843	2.63714	2.05459	0	0.145766	2.34586	0.0728829	4.82904
Gpr37	chr6	25689729	25691729	5.90216	2.23325	0	0.267237	4.06771	0.133619	4.82744
Hoxb3	chr11	96322326	96324326	30.641	12.7742	0.928263	0.583063	21.7076	0.755663	4.82601
Gpc5	chr14	115091626	115093626	7.91141	3.48387	0.163811	0.218649	5.69764	0.19123	4.82598
Slc32a1	chr2	158609606	158611606	13.0601	6.2531	0.273019	0.388709	9.6566	0.330864	4.82574
Nfia	chr4	97776819	97778819	5.39985	2.54591	0.163811	0.0971772	3.97288	0.130494	4.82523
Sfrp5	chr19	42201252	42203252	5.27427	3.7072	0.0546037	0.242943	4.49073	0.148773	4.82512
Rax	chr18	65938089	65940089	5.90216	2.90323	0	0.291532	4.40269	0.145766	4.82421
Fez1	chr9	36832635	36834635	6.78121	3.39454	0	0.34012	5.08787	0.17006	4.82335
Nxph4	chr10	127533559	127535559	20.3436	8.21836	0.382226	0.607358	14.281	0.494792	4.82327
Klhl1	chr14	96518102	96520102	2.13482	1.16129	0	0.0971772	1.64806	0.0485886	4.82273
Slc32a1	chr2	158609590	158611590	13.0601	6.20844	0.273019	0.388709	9.63427	0.330864	4.82241
Neurod1	chr2	79455751	79457751	8.91603	4.51117	0.163811	0.291532	6.7136	0.227671	4.82219
Lphn3	chr5	81020593	81022593	13.8136	7.50372	0.273019	0.461592	10.6586	0.367305	4.8215
Supt3	chr17	44734366	44736366	5.39985	3.03722	0.109207	0.17006	4.21854	0.139634	4.82065
Nr3c2	chr8	76899621	76901621	7.28352	2.85856	0	0.34012	5.07104	0.17006	4.81857
Ascl2	chr7	142968264	142970264	11.1764	5.62779	0.163811	0.413003	8.40211	0.288407	4.81711
Ascl2	chr7	142968264	142970264	11.1764	5.62779	0.163811	0.413003	8.40211	0.288407	4.81711
Barhl1	chr2	28911495	28913495	17.3298	7.68238	0.163811	0.704535	12.5061	0.434173	4.81652
Islr2	chr9	58201285	58203285	18.8367	9.02233	0.43683	0.534475	13.9295	0.485652	4.81371
Dlx1	chr2	71529780	71531780	11.0509	6.3871	0.163811	0.437298	8.71898	0.300554	4.8129
Gm10837	chr14	122489586	122491586	11.5532	4.68983	0	0.558769	8.1215	0.279385	4.81246
Gabra1	chr11	42181163	42183163	2.63714	2.6799	0	0.17006	2.65852	0.0850301	4.81151
Fgf18	chr11	33145795	33147795	6.40447	2.14392	0.163811	0.121472	4.2742	0.142641	4.81081
Pax6	chr2	105684322	105686322	24.99	10.4516	0.491433	0.753123	17.7208	0.622278	4.80955
Nr2f1	chr13	78195373	78197373	17.3298	5.98511	0.327622	0.485886	11.6574	0.406754	4.80715
Nr2f1	chr13	78196038	78198038	13.4368	5.44913	0.218415	0.437298	9.44298	0.327856	4.80629
Pax6	chr2	105673055	105675055	16.953	7.32506	0.43683	0.413003	12.139	0.424916	4.80396
Lphn3	chr5	81020240	81022240	11.6787	5.98511	0.273019	0.34012	8.83193	0.306569	4.80377
Hoxb4	chr11	96315684	96317684	25.6179	12.5509	0.546037	0.801712	19.0844	0.673875	4.80327
Pitx2	chr3	129198969	129200969	5.27427	2.72457	0	0.267237	3.99942	0.133619	4.80308
Mapt	chr11	104230515	104232515	6.15332	2.85856	0.109207	0.194354	4.50594	0.151781	4.80291
E130114P18Rik	chr4	97776834	97778834	5.27427	2.54591	0.163811	0.0971772	3.91009	0.130494	4.8023
Pacsin1	chr17	27684227	27686227	4.5208	0.759305	0	0.17006	2.64006	0.0850301	4.80149
Fam189a1	chr7	65155416	65157416	2.63714	1.96526	0	0.145766	2.3012	0.0728829	4.80142
Nfia	chr4	97776803	97778803	5.39985	2.41191	0.163811	0.0971772	3.90588	0.130494	4.80075
Bnip3	chr7	138939730	138941730	10.2974	7.50372	0.109207	0.51018	8.90056	0.309694	4.80075
Fgfr2	chr7	130260857	130262857	7.66025	3.7072	0	0.388709	5.68372	0.194354	4.80023
Fgfr2	chr7	130260857	130262857	7.66025	3.7072	0	0.388709	5.68372	0.194354	4.80023
Fgfr2	chr7	130260857	130262857	7.66025	3.7072	0	0.388709	5.68372	0.194354	4.80023
Fgfr2	chr7	130260857	130262857	7.66025	3.7072	0	0.388709	5.68372	0.194354	4.80023
Fgfr2	chr7	130260857	130262857	7.66025	3.7072	0	0.388709	5.68372	0.194354	4.80023
Fgfr2	chr7	130260857	130262857	7.66025	3.7072	0	0.388709	5.68372	0.194354	4.80023
Fgfr2	chr7	130260857	130262857	7.66025	3.7072	0	0.388709	5.68372	0.194354	4.80023
Fgfr2	chr7	130260857	130262857	7.66025	3.7072	0	0.388709	5.68372	0.194354	4.80023
Fgfr2	chr7	130260857	130262857	7.66025	3.7072	0	0.388709	5.68372	0.194354	4.80023
Fgfr2	chr7	130260857	130262857	7.66025	3.7072	0	0.388709	5.68372	0.194354	4.80023
Fgfr2	chr7	130260857	130262857	7.66025	3.7072	0	0.388709	5.68372	0.194354	4.80023
Fgfr2	chr7	130260857	130262857	7.66025	3.7072	0	0.388709	5.68372	0.194354	4.80023
Fgfr2	chr7	130260857	130262857	7.66025	3.7072	0	0.388709	5.68372	0.194354	4.80023
Sphk1	chr11	116533160	116535160	4.77196	2.85856	0.109207	0.145766	3.81526	0.127487	4.7982
Zeb1	chr18	5593203	5595203	14.3159	5.62779	0.382226	0.315826	9.97184	0.349026	4.79715
Zeb1	chr18	5593203	5595203	14.3159	5.62779	0.382226	0.315826	9.97184	0.349026	4.79715
Metrnl	chr11	121701763	121703763	5.39985	2.72457	0.0546037	0.218649	4.06221	0.136626	4.7956
Lyzl4	chr9	121641096	121643096	4.77196	1.83127	0	0.218649	3.30161	0.109324	4.79457
Vwc2	chr11	11115485	11117485	12.5578	5.67246	0.0546037	0.583063	9.11512	0.318834	4.79442
Bnip3	chr7	138939750	138941750	10.2974	7.41439	0.109207	0.51018	8.85589	0.309694	4.7935
Islr2	chr9	58201534	58203534	19.339	8.79901	0.43683	0.558769	14.069	0.497799	4.79314
Shank3	chr15	89522677	89524677	11.5532	5.13648	0.218415	0.364415	8.34482	0.291415	4.79279
Chrdl2	chr7	100005404	100007404	10.6741	5.67246	0.109207	0.461592	8.17329	0.2854	4.79194
Npas4	chr19	4988971	4990971	8.03699	2.59057	0	0.364415	5.31378	0.182207	4.79172
Hoxd3	chr2	74725728	74727728	16.953	7.45906	0.327622	0.534475	12.206	0.431048	4.7917
Dock3	chr9	107230856	107232856	6.15332	4.4665	0	0.364415	5.30991	0.182207	4.79067
Foxa2	chr2	148044948	148046948	4.14407	4.10918	0.109207	0.17006	4.12663	0.139634	4.78895
Grin2a	chr16	9991533	9993533	9.6695	5.62779	0.218415	0.315826	7.64865	0.26712	4.7885
Kcnd3	chr3	105451330	105453330	8.28814	2.8139	0.163811	0.218649	5.55102	0.19123	4.78843
Kcnd3	chr3	105451573	105453573	8.91603	3.52854	0.163811	0.267237	6.22228	0.215524	4.78841
Stau2	chr1	16518260	16520260	2.00925	0.53598	0	0.0728829	1.27261	0.0364415	4.78753
Sphk1	chr11	116531457	116533457	10.5485	8.08437	0	0.655946	9.31646	0.327973	4.78635
Sphk1	chr11	116531473	116533473	10.5485	8.08437	0	0.655946	9.31646	0.327973	4.78635
Tbx2	chr11	85831223	85833223	4.39523	3.84119	0.109207	0.17006	4.11821	0.139634	4.78601
Dll1	chr17	15374100	15376100	6.53005	5.04715	0.109207	0.291532	5.7886	0.20037	4.78471
Kank4	chr4	98816537	98818537	4.14407	3.75186	0	0.267237	3.94797	0.133619	4.78444
Prdm1	chr10	44527501	44529501	9.6695	2.90323	0.218415	0.218649	6.28636	0.218532	4.78405
Podxl2	chr6	88874044	88876044	7.91141	2.8139	0.273019	0.0971772	5.36265	0.185098	4.78336
Wnt16	chr6	22287861	22289861	4.26965	2.94789	0	0.242943	3.60877	0.121472	4.78268
Cav1	chr6	17305410	17307410	5.02312	2.18859	0	0.242943	3.60585	0.121472	4.78151
Cav1	chr6	17305411	17307411	5.02312	2.18859	0	0.242943	3.60585	0.121472	4.78151
Cav1	chr6	17305411	17307411	5.02312	2.18859	0	0.242943	3.60585	0.121472	4.78151
Cav1	chr6	17305423	17307423	5.02312	2.18859	0	0.242943	3.60585	0.121472	4.78151
Mn1	chr5	111416362	111418362	4.77196	1.42928	0.109207	0.0971772	3.10062	0.103192	4.78035
Fzd1	chr5	4757216	4759216	5.14869	2.72457	0	0.267237	3.93663	0.133619	4.78031
Gm13288	chr4	88804531	88806531	3.64176	0.8933	0	0.145766	2.26753	0.0728829	4.78025
Kcnk12	chr17	87796994	87798994	3.01387	2.18859	0	0.17006	2.60123	0.0850301	4.7802
Cbln2	chr18	86711065	86713065	4.01849	2.6799	0.0546037	0.17006	3.3492	0.112332	4.77924
Meis1	chr11	19017714	19019714	13.1857	5.67246	0.109207	0.558769	9.42907	0.333988	4.77821
Meis1	chr11	19017714	19019714	13.1857	5.67246	0.109207	0.558769	9.42907	0.333988	4.77821
Sphk1	chr11	116531444	116533444	10.423	8.08437	0	0.655946	9.25367	0.327973	4.7766
Sphk1	chr11	116531451	116533451	10.423	8.08437	0	0.655946	9.25367	0.327973	4.7766
Sphk1	chr11	116531454	116533454	10.423	8.08437	0	0.655946	9.25367	0.327973	4.7766
Lhx9	chr1	138846719	138848719	7.53467	2.14392	0.163811	0.17006	4.8393	0.166936	4.77648
Esam	chr9	37529250	37531250	4.39523	1.7866	0.109207	0.0971772	3.09091	0.103192	4.77585
Mpped1	chr15	83779023	83781023	4.26965	2.90323	0	0.242943	3.58644	0.121472	4.77375
Dock3	chr9	107230868	107232868	6.02774	4.4665	0	0.364415	5.24712	0.182207	4.77354
Tesc	chr5	118026743	118028743	5.52543	2.63524	0.109207	0.17006	4.08033	0.139634	4.77271
Col27a1	chr4	63214412	63216412	4.5208	3.30521	0	0.267237	3.91301	0.133619	4.77165
Col27a1	chr4	63214435	63216435	4.5208	3.30521	0	0.267237	3.91301	0.133619	4.77165
Pax6	chr2	105680712	105682712	12.3066	4.95782	0.273019	0.34012	8.63223	0.306569	4.77081
Gata4	chr14	63244248	63246248	5.27427	4.19851	0.109207	0.218649	4.73639	0.163928	4.77027
Mafb	chr2	160366065	160368065	7.28352	3.34988	0.0546037	0.315826	5.3167	0.185215	4.77011
Gnao1	chr8	93808966	93810966	5.02312	0.80397	0	0.194354	2.91354	0.0971772	4.76965
Clstn1	chr4	149586248	149588248	9.92066	6.16377	0.109207	0.461592	8.04221	0.2854	4.76865
Lphn3	chr5	81020199	81022199	11.4276	5.80645	0.273019	0.34012	8.61702	0.306569	4.76827
Lphn3	chr5	81020202	81022202	11.4276	5.80645	0.273019	0.34012	8.61702	0.306569	4.76827
Cadm4	chr7	24481023	24483023	7.28352	2.50124	0.218415	0.121472	4.89238	0.169943	4.76787
Foxa1	chr12	57574817	57576817	12.9345	3.79653	0.327622	0.267237	8.36553	0.29743	4.76785
Chst8	chr7	34811711	34813711	5.52543	3.93052	0.109207	0.218649	4.72798	0.163928	4.76771
Rusc2	chr4	43381070	43383070	9.79508	3.61787	0.109207	0.364415	6.70647	0.236811	4.76623
Lmx1b	chr2	33639511	33641511	8.91603	4.15385	0.218415	0.242943	6.53494	0.230679	4.7652
Nr3c2	chr8	76899173	76901173	6.65563	2.45658	0	0.315826	4.5561	0.157913	4.76518
Hoxc9	chr15	102975439	102977439	13.3113	8.1737	0.163811	0.607358	10.7425	0.385584	4.76454
Tmem200c	chr17	68836136	68838136	4.14407	2.32258	0	0.218649	3.23333	0.109324	4.76451
Prtn3	chr10	79879980	79881980	7.78583	3.61787	0.109207	0.291532	5.70185	0.20037	4.76296
Prtn3	chr10	79880004	79882004	7.78583	3.61787	0.109207	0.291532	5.70185	0.20037	4.76296
Prtn3	chr10	79880042	79882042	7.78583	3.61787	0.109207	0.291532	5.70185	0.20037	4.76296
Chst8	chr7	34811686	34813686	5.52543	3.88586	0.109207	0.218649	4.70564	0.163928	4.76089
Atp12a	chr14	56364068	56366068	6.65563	3.08189	0	0.34012	4.86876	0.17006	4.75996
Elavl2	chr4	91372030	91374030	7.03236	4.01985	0	0.388709	5.52611	0.194354	4.75973
Sema3c	chr5	17573649	17575649	4.5208	1.9206	0	0.218649	3.2207	0.109324	4.75889
Barhl1	chr2	28915440	28917440	7.91141	5.27047	0.0546037	0.413003	6.59094	0.233803	4.75888
Dlgap1	chr17	69968421	69970421	1.63251	1.51861	0	0.0971772	1.57556	0.0485886	4.75823
Car10	chr11	93098290	93100290	3.76734	1.51861	0.0546037	0.121472	2.64297	0.0880376	4.75813
Car10	chr11	93098290	93100290	3.76734	1.51861	0.0546037	0.121472	2.64297	0.0880376	4.75813
Foxb2	chr19	16872830	16874830	16.4507	7.05707	0.43683	0.413003	11.7539	0.424916	4.75748
Nags	chr11	102144549	102146549	16.3251	5.04715	0.382226	0.388709	10.6861	0.385467	4.75739
Mpped1	chr15	83778982	83780982	4.26965	2.8139	0	0.242943	3.54177	0.121472	4.75572
Hoxa13	chr6	52259802	52261802	6.2789	4.73449	0.218415	0.17006	5.50669	0.194237	4.75548
Hoxa13	chr6	52259802	52261802	6.2789	4.73449	0.218415	0.17006	5.50669	0.194237	4.75548
Hoxa13	chr6	52259802	52261802	6.2789	4.73449	0.218415	0.17006	5.50669	0.194237	4.75548
Hoxa13	chr6	52259802	52261802	6.2789	4.73449	0.218415	0.17006	5.50669	0.194237	4.75548
Hoxa13	chr6	52259803	52261803	6.2789	4.73449	0.218415	0.17006	5.50669	0.194237	4.75548
Gm10000	chr12	104473488	104475488	10.2974	5.13648	0.382226	0.17006	7.71693	0.276143	4.75509
Fgf11	chr11	69800857	69802857	18.9623	5.80645	0.43683	0.461592	12.3844	0.449211	4.75438
Dlk1	chr12	109451823	109453823	10.2974	3.97519	0.218415	0.291532	7.13629	0.254973	4.75328
Hoxc11	chr15	102953427	102955427	19.0878	7.77171	0.491433	0.485886	13.4298	0.48866	4.75231
Pax6	chr2	105674433	105676433	10.0462	7.32506	0.163811	0.461592	8.68565	0.312701	4.75202
Stau2	chr1	16518211	16520211	2.51156	0.62531	0	0.0971772	1.56843	0.0485886	4.75173
Wt1	chr2	105125996	105127996	6.15332	3.52854	0	0.34012	4.84093	0.17006	4.75171
Prr16	chr18	51116898	51118898	5.39985	1.65261	0	0.242943	3.52623	0.121472	4.74939
Dlk1	chr12	109451849	109453849	10.2974	3.93052	0.218415	0.291532	7.11396	0.254973	4.74876
Emx1	chr6	85192519	85194519	9.04161	5.18114	0	0.51018	7.11138	0.25509	4.7476
Nr2f2	chr7	70365735	70367735	13.0601	5.3598	0.327622	0.34012	9.20995	0.333871	4.74482
Sox7	chr14	63942674	63944674	10.1718	5.31514	0.218415	0.34012	7.74347	0.279268	4.74437
Cbln2	chr18	86710110	86712110	4.14407	3.03722	0.0546037	0.194354	3.59065	0.124479	4.7428
Irx4	chr13	73259799	73261799	13.8136	7.50372	0.218415	0.558769	10.6586	0.388592	4.74232
Nr4a2	chr2	57112072	57114072	11.4276	7.77171	0.163811	0.534475	9.59965	0.349143	4.74185
Barhl1	chr2	28915668	28917668	9.04161	5.27047	0.0546037	0.461592	7.15604	0.258098	4.74035
Hoxb2	chr11	96342769	96344769	14.9438	7.45906	0.382226	0.437298	11.2014	0.409762	4.73925
Pcdhga11	chr18	37814079	37816079	13.0601	4.95782	0.218415	0.437298	9.00896	0.327856	4.73848
Wt1	chr2	105126001	105128001	6.15332	3.43921	0	0.34012	4.79626	0.17006	4.73836
Tbx3	chr5	119674445	119676445	22.7296	10.139	0.43683	0.777418	16.4343	0.607124	4.73588
Prdm13	chr4	21684781	21686781	18.9623	9.15633	0.600641	0.437298	14.0593	0.518969	4.73322
Prdm13	chr4	21684783	21686783	18.9623	9.15633	0.600641	0.437298	14.0593	0.518969	4.73322
Prdm13	chr4	21684783	21686783	18.9623	9.15633	0.600641	0.437298	14.0593	0.518969	4.73322
Stau2	chr1	16518228	16520228	2.51156	0.580645	0	0.0971772	1.5461	0.0485886	4.73117
Stau2	chr1	16518228	16520228	2.51156	0.580645	0	0.0971772	1.5461	0.0485886	4.73117
Gbx2	chr1	89932290	89934290	23.3575	9.87097	0.819056	0.413003	16.6142	0.616029	4.73091
Ube2ql1	chr13	69738897	69740897	3.26503	1.11663	0	0.145766	2.19083	0.0728829	4.73083
Hspa1a	chr17	34968912	34970912	11.1764	4.95782	0.273019	0.315826	8.06713	0.294422	4.7297
Lhx2	chr2	38338488	38340488	5.77658	3.75186	0	0.34012	4.76422	0.17006	4.72872
Col13a1	chr10	61977121	61979121	10.5485	4.28784	0.0546037	0.485886	7.41819	0.270245	4.72825
Sim2	chr16	94084260	94086260	9.79508	3.26055	0.327622	0.145766	6.52781	0.236694	4.72801
Dlk1	chr12	109452655	109454655	10.6741	4.77916	0.273019	0.291532	7.72664	0.282275	4.72631
Tal1	chr4	115056438	115058438	16.3251	8.933	0.327622	0.607358	12.6291	0.46749	4.72628
Onecut1	chr9	74847503	74849503	7.66025	2.63524	0.273019	0.0971772	5.14774	0.185098	4.72447
Onecut1	chr9	74847526	74849526	7.66025	2.63524	0.273019	0.0971772	5.14774	0.185098	4.72447
Esrrg	chr1	187608029	187610029	9.79508	6.2531	0.273019	0.315826	8.02409	0.294422	4.72199
Dock3	chr9	107230909	107232909	5.65101	4.4665	0	0.364415	5.05875	0.182207	4.7209
Zic1	chr9	91362054	91364054	23.7342	10.6749	0.655245	0.631652	17.2046	0.643448	4.71941
Hand1	chr11	57831147	57833147	8.03699	3.66253	0.109207	0.315826	5.84976	0.212517	4.71886
Pax6	chr2	105677391	105679391	21.725	10.0943	0.43683	0.753123	15.9096	0.594977	4.71778
Hoxc6	chr15	103008479	103010479	9.92066	6.07444	0.273019	0.315826	7.99755	0.294422	4.71722
Stau2	chr1	16518307	16520307	1.88367	0.53598	0	0.0728829	1.20982	0.0364415	4.71512
Adad1	chr3	37062527	37064527	5.52543	2.63524	0	0.291532	4.08033	0.145766	4.71477
Coro1a	chr7	126703753	126705753	3.51618	1.60794	0.0546037	0.121472	2.56206	0.0880376	4.71345
Coro1a	chr7	126703754	126705754	3.51618	1.60794	0.0546037	0.121472	2.56206	0.0880376	4.71345
Kcnd3	chr3	105452086	105454086	4.64638	2.54591	0.109207	0.145766	3.59614	0.127487	4.71309
Hspa4l	chr3	40743495	40745495	2.51156	1.96526	0.0546037	0.0971772	2.23841	0.0758905	4.71026
Fam84a	chr12	14151038	14153038	18.3344	6.78908	0.600641	0.34012	12.5617	0.470381	4.70986
Lhx2	chr2	38338281	38340281	5.14869	3.61787	0	0.315826	4.38328	0.157913	4.70951
Isl2	chr9	55540148	55542148	10.9253	4.51117	0.109207	0.461592	7.71822	0.2854	4.7094
Oplah	chr15	76306389	76308389	5.27427	1.74194	0.0546037	0.194354	3.5081	0.124479	4.70934
Hoxa13	chr6	52259880	52261880	6.15332	4.51117	0.218415	0.17006	5.33224	0.194237	4.70913
Acvrl1	chr15	101127924	101129924	6.90679	3.12655	0	0.364415	5.01667	0.182207	4.70887
Meis1	chr11	19017958	19019958	11.4276	5.27047	0.109207	0.51018	8.34903	0.309694	4.70857
Meis1	chr11	19017958	19019958	11.4276	5.27047	0.109207	0.51018	8.34903	0.309694	4.70857
Tbx4	chr11	85889063	85891063	9.41834	6.16377	0.163811	0.413003	7.79106	0.288407	4.70832
Six6	chr12	72939083	72941083	12.9345	5.18114	0.382226	0.291532	9.05783	0.336879	4.70825
Barhl1	chr2	28915412	28917412	6.90679	5.18114	0.0546037	0.388709	6.04396	0.221656	4.70782
Tpm1	chr9	67048213	67050213	9.79508	3.08189	0.109207	0.364415	6.43848	0.236811	4.70748
Nkx2-4	chr2	147084445	147086445	10.423	3.39454	0.218415	0.291532	6.90875	0.254973	4.70659
AI118078	chr9	55325749	55327749	8.16256	3.75186	0	0.437298	5.95721	0.218649	4.70585
Slc32a1	chr2	158609659	158611659	12.8089	6.3871	0.327622	0.388709	9.59802	0.358166	4.70581
Tmem151a	chr19	5084531	5086531	6.90679	3.5732	0.163811	0.218649	5.23999	0.19123	4.7054
Adamtsl5	chr10	80345119	80347119	13.3113	8.57568	0.163811	0.655946	10.9435	0.409879	4.70527
Nrg3	chr14	39471827	39473827	3.64176	1.60794	0.109207	0.0728829	2.62485	0.0910452	4.70465
Hlx	chr1	184731451	184733451	7.28352	3.34988	0	0.388709	5.3167	0.194354	4.7041
Fhod3	chr18	24708445	24710445	5.02312	1.96526	0.0546037	0.194354	3.49419	0.124479	4.70363
Susd4	chr1	182762860	182764860	2.63714	1.0273	0	0.121472	1.83222	0.0607358	4.70286
Opcml	chr9	27790302	27792302	7.66025	3.75186	0.0546037	0.364415	5.70606	0.209509	4.70267
Sox1	chr8	12384771	12386771	10.5485	4.33251	0.382226	0.17006	7.44053	0.276143	4.70253
Tpm1	chr9	67048209	67050209	9.79508	3.03722	0.109207	0.364415	6.41615	0.236811	4.70248
Acvrl1	chr15	101127922	101129922	6.90679	3.08189	0	0.364415	4.99434	0.182207	4.70244
Podxl2	chr6	88873989	88875989	7.91141	2.85856	0.273019	0.121472	5.38499	0.197245	4.70221
Shox2	chr3	66980771	66982771	6.2789	4.01985	0.109207	0.267237	5.14937	0.188222	4.702
Rusc2	chr4	43381057	43383057	9.79508	3.66253	0.109207	0.388709	6.7288	0.248958	4.7017
Sez6l	chr5	112576198	112578198	9.16719	3.48387	0.273019	0.194354	6.32553	0.233686	4.70037
Sez6l	chr5	112576198	112578198	9.16719	3.48387	0.273019	0.194354	6.32553	0.233686	4.70037
Hoxb13	chr11	96176551	96178551	17.3298	6.34243	0.600641	0.291532	11.8361	0.446086	4.69896
Gng4	chr13	13783059	13785059	6.78121	2.23325	0.109207	0.218649	4.50723	0.163928	4.69888
Nags	chr11	102144513	102146513	15.6972	4.82382	0.382226	0.388709	10.2605	0.385467	4.69881
Prr18	chr17	8339406	8341406	9.04161	3.12655	0.109207	0.34012	6.08408	0.224664	4.69874
Alx4	chr2	93641384	93643384	5.14869	3.7072	0.0546037	0.267237	4.42795	0.160921	4.69849
Alx4	chr2	93641388	93643388	5.14869	3.7072	0.0546037	0.267237	4.42795	0.160921	4.69849
Meis1	chr11	19017922	19019922	11.302	5.27047	0.109207	0.51018	8.28624	0.309694	4.69769
Meis1	chr11	19017922	19019922	11.302	5.27047	0.109207	0.51018	8.28624	0.309694	4.69769
Onecut1	chr9	74847995	74849995	10.5485	5.53846	0.382226	0.218649	8.0435	0.300437	4.69724
Sox17	chr1	4495413	4497413	10.7997	5.44913	0.218415	0.388709	8.12442	0.303562	4.69722
Plxnd1	chr6	115994005	115996005	7.28352	2.18859	0.0546037	0.291532	4.73605	0.173068	4.69628
Col2a1	chr15	98003657	98005657	2.76271	2.14392	0	0.17006	2.45332	0.0850301	4.69607
Col2a1	chr15	98003657	98005657	2.76271	2.14392	0	0.17006	2.45332	0.0850301	4.69607
Ankrd63	chr2	118702963	118704963	9.29277	4.42184	0	0.51018	6.8573	0.25509	4.69519
Sypl2	chr3	108225648	108227648	10.1718	5.89578	0.163811	0.437298	8.0338	0.300554	4.69496
Cryba2	chr1	74892143	74894143	11.5532	7.81638	0	0.728829	9.68477	0.364415	4.6945
Fbxl8	chr8	105263682	105265682	12.5578	5.85112	0.327622	0.364415	9.20445	0.346018	4.69388
Sypl2	chr3	108225643	108227643	10.1718	5.85112	0.163811	0.437298	8.01146	0.300554	4.69095
Fbxl8	chr8	105263648	105265648	12.5578	5.80645	0.327622	0.364415	9.18212	0.346018	4.69037
Vax1	chr19	59170136	59172136	15.4461	8.84367	0.43683	0.485886	12.1449	0.461358	4.68857
Coro1a	chr7	126703816	126705816	3.51618	1.51861	0.0546037	0.121472	2.5174	0.0880376	4.68817
Tradd	chr8	105263609	105265609	12.5578	5.76179	0.327622	0.364415	9.15979	0.346018	4.68686
Dlk1	chr12	109452660	109454660	10.2974	4.73449	0.273019	0.291532	7.51594	0.282275	4.68647
9230102O04Rik	chr2	9881636	9883636	11.0509	6.78908	0.163811	0.51018	8.91997	0.336996	4.68567
Pcdhga11	chr18	37754773	37756773	14.4415	9.64765	0.163811	0.753123	12.0446	0.458467	4.68549
Tradd	chr8	105263603	105265603	12.5578	5.71712	0.327622	0.364415	9.13746	0.346018	4.68335
Rasl10a	chr11	5057966	5059966	12.5578	5.09181	0.327622	0.34012	8.8248	0.333871	4.68326
Isl2	chr9	55540207	55542207	10.5485	4.6005	0.109207	0.461592	7.57452	0.2854	4.68232
Isl2	chr9	55540207	55542207	10.5485	4.6005	0.109207	0.461592	7.57452	0.2854	4.68232
Hoxa2	chr6	52164413	52166413	12.1811	7.01241	0.218415	0.51018	9.59673	0.364298	4.68179
Sox17	chr1	4495363	4497363	10.7997	5.27047	0.218415	0.388709	8.03509	0.303562	4.68129
Lingo2	chr4	36950744	36952744	6.65563	3.17122	0.218415	0.145766	4.91342	0.18209	4.6798
Lingo2	chr4	36950747	36952747	6.65563	3.17122	0.218415	0.145766	4.91342	0.18209	4.6798
Gata4	chr14	63244271	63246271	5.27427	4.24318	0.109207	0.242943	4.75872	0.176075	4.67965
Irx4	chr13	73259497	73261497	13.688	7.95037	0.218415	0.607358	10.8192	0.412886	4.67851
Hoxd10	chr2	74667310	74669310	9.79508	3.43921	0.327622	0.17006	6.61714	0.248841	4.67825
Otop1	chr5	38276404	38278404	7.66025	4.95782	0.109207	0.364415	6.30904	0.236811	4.67823
Plcl1	chr1	55405388	55407388	6.15332	3.03722	0	0.34012	4.59527	0.17006	4.67673
9230102O04Rik	chr2	9882993	9884993	12.4322	8.70968	0.273019	0.534475	10.5709	0.403747	4.67658
Ecel1	chr1	87154311	87156311	10.0462	8.57568	0.273019	0.437298	9.31096	0.355158	4.67389
Tril	chr6	53819825	53821825	5.77658	3.08189	0.109207	0.218649	4.42924	0.163928	4.67375
Tmem132e	chr11	82388123	82390123	5.02312	2.59057	0.109207	0.17006	3.80684	0.139634	4.67287
Ecel1	chr1	87154027	87156027	10.423	8.79901	0.273019	0.461592	9.61099	0.367305	4.67238
Rasd2	chr8	75213502	75215502	5.52543	3.17122	0.0546037	0.267237	4.34832	0.160921	4.67238
Pou4f1	chr14	104464365	104466365	8.41372	8.933	0.0546037	0.607358	8.67336	0.330981	4.67049
Tmco5b	chr2	113216051	113218051	3.51618	1.9206	0	0.194354	2.71839	0.0971772	4.66998
Tmco5b	chr2	113216062	113218062	3.51618	1.9206	0	0.194354	2.71839	0.0971772	4.66998
Tmco5b	chr2	113216068	113218068	3.51618	1.9206	0	0.194354	2.71839	0.0971772	4.66998
Onecut1	chr9	74865484	74867484	10.7997	5.76179	0.218415	0.413003	8.28074	0.315709	4.66985
Ccser1	chr6	61179537	61181537	4.39523	1.96526	0.109207	0.121472	3.18024	0.115339	4.66975
Ccser1	chr6	61179538	61181538	4.39523	1.96526	0.109207	0.121472	3.18024	0.115339	4.66975
9030612E09Rik	chr10	43173704	43175704	6.15332	4.37717	0.0546037	0.34012	5.26525	0.197362	4.66901
Lphn3	chr5	81020810	81022810	14.3159	7.63772	0.382226	0.461592	10.9768	0.421909	4.6689
Wnt3a	chr11	59289752	59291752	16.074	7.41439	0.491433	0.413003	11.7442	0.452218	4.66846
Hic1	chr11	75171560	75173560	8.03699	4.4665	0.109207	0.364415	6.25174	0.236811	4.66509
Onecut1	chr9	74847463	74849463	7.28352	2.59057	0.273019	0.0971772	4.93705	0.185098	4.6643
Htra4	chr8	25037962	25039962	4.39523	3.48387	0	0.291532	3.93955	0.145766	4.66424
Sowaha	chr11	53479195	53481195	10.423	5.76179	0.109207	0.51018	8.09238	0.309694	4.66358
Podn	chr4	108031090	108033090	11.8043	3.12655	0.327622	0.242943	7.46544	0.285283	4.66199
Hoxa10	chr6	52232324	52234324	18.8367	8.97767	0.546037	0.534475	13.9072	0.540256	4.66062
Tmem151a	chr19	5084487	5086487	6.53005	3.61787	0.163811	0.218649	5.07396	0.19123	4.65904
Tmem151a	chr19	5084487	5086487	6.53005	3.61787	0.163811	0.218649	5.07396	0.19123	4.65904
Ptger4	chr15	5243187	5245187	11.0509	5.22581	0.163811	0.461592	8.13833	0.312701	4.65823
Dlk1	chr12	109452535	109454535	10.1718	4.55583	0.273019	0.291532	7.36382	0.282275	4.65701
Prdm13	chr4	21684845	21686845	18.9623	8.933	0.600641	0.485886	13.9476	0.543263	4.65694
Cd14	chr18	36725736	36727736	8.41372	3.7072	0.218415	0.242943	6.06046	0.230679	4.65662
Gm16499	chr6	53818975	53820975	6.53005	5.58313	0.218415	0.242943	6.05659	0.230679	4.6557
Kcnj10	chr1	172340210	172342210	8.91603	3.79653	0.218415	0.267237	6.35628	0.242826	4.65423
Ihh	chr1	74950651	74952651	16.953	8.88834	0.546037	0.461592	12.9207	0.503814	4.65341
Nkx6-2	chr7	139581797	139583797	9.16719	5.67246	0.327622	0.242943	7.41982	0.285283	4.65316
Kalrn	chr16	34572532	34574532	2.51156	1.0273	0	0.121472	1.76943	0.0607358	4.65283
Hoxc5	chr15	103017936	103019936	17.5809	7.77171	0.600641	0.388709	12.6763	0.494675	4.65177
Slc32a1	chr2	158609767	158611767	13.688	6.16377	0.382226	0.388709	9.92588	0.385467	4.65102
Gm9945	chr11	53479166	53481166	10.2974	5.71712	0.109207	0.51018	8.00726	0.309694	4.64835
Tmem132d	chr5	128432077	128434077	5.90216	2.18859	0.109207	0.194354	4.04537	0.151781	4.64772
Gm4793	chr1	135583773	135585773	3.01387	1.87593	0.0546037	0.121472	2.4449	0.0880376	4.64619
Sypl2	chr3	108225599	108227599	10.423	5.71712	0.163811	0.461592	8.07005	0.312701	4.64609
Ly6h	chr15	75566216	75568216	9.6695	3.12655	0.0546037	0.437298	6.39803	0.245951	4.64594
Lzts3	chr2	130637095	130639095	9.6695	3.5732	0.218415	0.291532	6.62135	0.254973	4.64538
Lzts3	chr2	130637095	130639095	9.6695	3.5732	0.218415	0.291532	6.62135	0.254973	4.64538
Nkx6-2	chr7	139581790	139583790	9.04161	5.71712	0.327622	0.242943	7.37937	0.285283	4.64528
Tpm1	chr9	67048262	67050262	9.04161	3.12655	0.0546037	0.413003	6.08408	0.233803	4.64362
Tpm1	chr9	67048264	67050264	9.04161	3.12655	0.0546037	0.413003	6.08408	0.233803	4.64362
Tpm1	chr9	67048267	67050267	9.04161	3.12655	0.0546037	0.413003	6.08408	0.233803	4.64362
Tpm1	chr9	67048275	67050275	9.04161	3.12655	0.0546037	0.413003	6.08408	0.233803	4.64362
Slc32a1	chr2	158609723	158611723	13.4368	6.29777	0.382226	0.388709	9.8673	0.385467	4.64249
Pthlh	chr6	147263167	147265167	9.92066	4.64516	0.273019	0.291532	7.28291	0.282275	4.6411
Lphn3	chr5	81020791	81022791	13.9391	7.59305	0.382226	0.461592	10.7661	0.421909	4.64096
Lphn3	chr5	81020792	81022792	13.9391	7.59305	0.382226	0.461592	10.7661	0.421909	4.64096
Ly6h	chr15	75566255	75568255	9.6695	3.08189	0.0546037	0.437298	6.37569	0.245951	4.64091
Sptbn1	chr11	30266214	30268214	2.63714	1.47395	0	0.145766	2.05554	0.0728829	4.6393
Onecut1	chr9	74847437	74849437	7.15794	2.54591	0.273019	0.0971772	4.85192	0.185098	4.63926
Onecut1	chr9	74860921	74862921	15.6972	7.01241	0.600641	0.291532	11.3548	0.446086	4.63912
Stau2	chr1	16518270	16520270	1.75809	0.53598	0	0.0728829	1.14704	0.0364415	4.63888
Stau2	chr1	16518306	16520306	1.75809	0.53598	0	0.0728829	1.14704	0.0364415	4.63888
Stau2	chr1	16518306	16520306	1.75809	0.53598	0	0.0728829	1.14704	0.0364415	4.63888
4833424O15Rik	chr3	117574360	117576360	4.26965	1.65261	0	0.218649	2.96113	0.109324	4.63805
Adad1	chr3	37062631	37064631	5.52543	2.8139	0	0.315826	4.16966	0.157913	4.6376
Tfap2d	chr1	19102022	19104022	25.4923	10.9429	0.764452	0.680241	18.2176	0.722346	4.63746
Ptger4	chr15	5243172	5245172	10.9253	5.09181	0.163811	0.461592	8.00855	0.312701	4.63507
Gsx1	chr5	147187696	147189696	10.1718	5.98511	0.218415	0.413003	8.07846	0.315709	4.63421
Bnc2	chr4	84674067	84676067	3.26503	1.42928	0	0.17006	2.34715	0.0850301	4.63252
Notum	chr11	120660175	120662175	6.15332	4.10918	0.0546037	0.34012	5.13125	0.197362	4.6319
Prdm13	chr4	21684963	21686963	18.46	8.933	0.600641	0.485886	13.6965	0.543263	4.63075
Prdm13	chr4	21684963	21686963	18.46	8.933	0.600641	0.485886	13.6965	0.543263	4.63075
Nkx2-5	chr17	26840565	26842565	12.3066	6.65509	0.382226	0.364415	9.48086	0.37332	4.62992
Phf15	chr11	51856653	51858653	1.63251	0.044665	0	0.0485886	0.838589	0.0242943	4.62902
Phf15	chr11	51856653	51858653	1.63251	0.044665	0	0.0485886	0.838589	0.0242943	4.62902
Gm3944	chr12	18852872	18854872	0.251156	0.223325	0	0	0.23724	0	4.62784
Wiz	chr17	32394371	32396371	14.8182	6.20844	0.0546037	0.777418	10.5133	0.416011	4.62656
Gfra4	chr2	131040511	131042511	10.7997	5.71712	0.382226	0.267237	8.25841	0.324732	4.62653
Gfi1	chr5	107724157	107726157	9.41834	7.10174	0.163811	0.485886	8.26004	0.324849	4.62631
Acvrl1	chr15	101127537	101129537	7.03236	3.03722	0	0.388709	5.03479	0.194354	4.62565
Acvrl1	chr15	101127551	101129551	7.03236	3.03722	0	0.388709	5.03479	0.194354	4.62565
Acvrl1	chr15	101127551	101129551	7.03236	3.03722	0	0.388709	5.03479	0.194354	4.62565
Acvrl1	chr15	101127574	101129574	7.03236	3.03722	0	0.388709	5.03479	0.194354	4.62565
Dio3	chr12	110278068	110280068	7.53467	3.5732	0.382226	0.0485886	5.55394	0.215407	4.6255
Cidea	chr18	67342564	67344564	5.65101	3.21588	0	0.34012	4.43344	0.17006	4.62513
Zic4	chr9	91377642	91379642	7.15794	6.34243	0.163811	0.364415	6.75019	0.264113	4.62422
Mixl1	chr1	180696034	180698034	6.53005	3.52854	0	0.388709	5.02929	0.194354	4.62408
Flt4	chr11	49608263	49610263	3.01387	1.65261	0	0.17006	2.33324	0.0850301	4.62398
Flt4	chr11	49608263	49610263	3.01387	1.65261	0	0.17006	2.33324	0.0850301	4.62398
Raet1c	chr10	22157586	22159586	2.38598	3.17122	0.109207	0.0971772	2.7786	0.103192	4.62269
Foxc2	chr8	121115171	121117171	11.8043	4.06452	0.382226	0.242943	7.93442	0.312585	4.62219
Slc6a5	chr7	49910700	49912700	27.376	12.1042	0.928263	0.655946	19.7401	0.792105	4.62193
Bcan	chr3	87999356	88001356	10.0462	4.4665	0.327622	0.242943	7.25637	0.285283	4.62107
Hoxa10	chr6	52232706	52234706	18.8367	9.55832	0.600641	0.534475	14.1975	0.567558	4.62054
Shh	chr5	28466101	28468101	19.2134	7.81638	0.764452	0.315826	13.5149	0.540139	4.61968
Bnc2	chr4	84674078	84676078	3.26503	1.38462	0	0.17006	2.32482	0.0850301	4.61878
Bnc2	chr4	84674086	84676086	3.26503	1.38462	0	0.17006	2.32482	0.0850301	4.61878
Ppp1r1b	chr11	98349855	98351855	19.4646	9.64765	0.218415	0.947478	14.5561	0.582946	4.61857
Cacna2d3	chr14	29720864	29722864	5.65101	2.72457	0.0546037	0.267237	4.18779	0.160921	4.61823
Lhx6	chr2	36103891	36105891	15.9484	7.45906	0.327622	0.607358	11.7037	0.46749	4.61659
Nptxr	chr15	79803766	79805766	8.5393	3.84119	0.218415	0.267237	6.19025	0.242826	4.61611
Gfra4	chr2	131040457	131042457	10.6741	5.71712	0.382226	0.267237	8.19562	0.324732	4.61554
Dlk1	chr12	109452491	109454491	9.41834	4.28784	0.273019	0.267237	6.85309	0.270128	4.6147
Dlk1	chr12	109452491	109454491	9.41834	4.28784	0.273019	0.267237	6.85309	0.270128	4.6147
Wt1	chr2	105126210	105128210	6.02774	3.34988	0	0.364415	4.68881	0.182207	4.61156
Pitx1	chr13	55830425	55832425	4.5208	2.32258	0.163811	0.0971772	3.42169	0.130494	4.61034
Foxd2	chr4	114907898	114909898	5.52543	3.39454	0.0546037	0.291532	4.45999	0.173068	4.60982
Bnc2	chr4	84673996	84675996	3.51618	1.69727	0	0.194354	2.60673	0.0971772	4.60969
Bnc2	chr4	84673996	84675996	3.51618	1.69727	0	0.194354	2.60673	0.0971772	4.60969
Slc7a10	chr7	35185482	35187482	10.9253	3.61787	0.382226	0.194354	7.27157	0.28829	4.60946
Ecel1	chr1	87155521	87157521	9.92066	7.1464	0.218415	0.461592	8.53353	0.340003	4.60939
Tradd	chr8	105263581	105265581	11.6787	5.67246	0.327622	0.364415	8.6756	0.346018	4.6086
Tpm1	chr9	67048406	67050406	8.79045	3.08189	0.0546037	0.413003	5.93617	0.233803	4.60817
Vwc2	chr11	11114851	11116851	12.1811	6.02978	0.218415	0.51018	9.10542	0.364298	4.60605
Stk33	chr7	109438076	109440076	6.90679	4.19851	0	0.437298	5.55265	0.218649	4.60457
Nkd2	chr13	73846612	73848612	6.15332	3.17122	0	0.364415	4.66227	0.182207	4.60339
Nkd2	chr13	73846612	73848612	6.15332	3.17122	0	0.364415	4.66227	0.182207	4.60339
Tchh	chr3	93441330	93443330	7.4091	4.42184	0.0546037	0.413003	5.91547	0.233803	4.60314
Nfia	chr4	97776608	97778608	5.02312	2.36725	0.163811	0.121472	3.69518	0.142641	4.60133
Nfia	chr4	97776626	97778626	5.02312	2.36725	0.163811	0.121472	3.69518	0.142641	4.60133
Cpt1a	chr19	3322301	3324301	4.89754	2.05459	0	0.267237	3.47606	0.133619	4.60128
Fgf11	chr11	69800716	69802716	18.9623	5.80645	0.491433	0.51018	12.3844	0.500807	4.60076
Necab2	chr8	119445719	119447719	5.52543	1.56328	0.0546037	0.218649	3.54435	0.136626	4.59937
Ly6h	chr15	75565856	75567856	6.53005	2.32258	0.0546037	0.291532	4.42632	0.173068	4.59891
Tmem198	chr1	75486233	75488233	7.78583	5.18114	0.0546037	0.461592	6.48349	0.258098	4.59816
Bnc2	chr4	84673997	84675997	3.51618	1.65261	0	0.194354	2.58439	0.0971772	4.59733
Bnc2	chr4	84673997	84675997	3.51618	1.65261	0	0.194354	2.58439	0.0971772	4.59733
Dlgap1	chr17	69968368	69970368	1.38136	1.42928	0	0.0971772	1.40532	0.0485886	4.59436
Dlgap1	chr17	69968368	69970368	1.38136	1.42928	0	0.0971772	1.40532	0.0485886	4.59436
Dlgap1	chr17	69968373	69970373	1.38136	1.42928	0	0.0971772	1.40532	0.0485886	4.59436
Dlgap1	chr17	69968402	69970402	1.38136	1.42928	0	0.0971772	1.40532	0.0485886	4.59436
Mdga1	chr17	29886482	29888482	7.53467	4.51117	0.163811	0.315826	6.02292	0.239819	4.5939
Tal1	chr4	115056811	115058811	15.4461	8.75434	0.327622	0.655946	12.1002	0.491784	4.59301
Bmp3	chr5	98853439	98855439	7.53467	4.06452	0	0.461592	5.7996	0.230796	4.59256
Tmco5b	chr2	113216096	113218096	3.76734	1.96526	0	0.218649	2.8663	0.109324	4.59125
Zic4	chr9	91368498	91370498	14.9438	7.01241	0.382226	0.51018	10.9781	0.446203	4.59012
Lhx1	chr11	84521067	84523067	19.7157	12.3275	0.43683	0.874595	16.0216	0.655712	4.58988
Six6	chr12	72939772	72941772	13.8136	6.96774	0.382226	0.461592	10.3907	0.421909	4.5898
Six6	chr12	72939833	72941833	13.8136	6.96774	0.382226	0.461592	10.3907	0.421909	4.5898
Nkd2	chr13	73846631	73848631	6.15332	3.08189	0	0.364415	4.6176	0.182207	4.58953
Gadd45b	chr10	80929091	80931091	12.9345	5.94045	0.327622	0.437298	9.43749	0.38246	4.58931
Acvrl1	chr15	101127522	101129522	6.78121	3.03722	0	0.388709	4.90921	0.194354	4.58928
Tnfaip2	chr12	111443998	111445998	13.5624	7.63772	0.327622	0.534475	10.6001	0.431048	4.58835
Csmd1	chr8	17534281	17536281	6.2789	4.68983	0.218415	0.218649	5.48436	0.218532	4.58749
Csmd1	chr8	17534281	17536281	6.2789	4.68983	0.218415	0.218649	5.48436	0.218532	4.58749
Csmd1	chr8	17534281	17536281	6.2789	4.68983	0.218415	0.218649	5.48436	0.218532	4.58749
Stau2	chr1	16518240	16520240	2.2604	0.53598	0	0.0971772	1.39819	0.0485886	4.58708
Nr3c2	chr8	76898442	76900442	5.77658	2.85856	0	0.34012	4.31757	0.17006	4.58701
Skor2	chr18	76855405	76857405	9.16719	6.16377	0.327622	0.291532	7.66548	0.309577	4.58602
Gata3	chr2	9874399	9876399	16.1996	11.6576	0.43683	0.704535	13.9286	0.570682	4.58519
Tbx5	chr5	119833663	119835663	4.64638	3.39454	0	0.315826	4.02046	0.157913	4.58516
Bnc2	chr4	84673999	84675999	3.51618	1.60794	0	0.194354	2.56206	0.0971772	4.58485
Bnc2	chr4	84673999	84675999	3.51618	1.60794	0	0.194354	2.56206	0.0971772	4.58485
Lfng	chr5	140606341	140608341	5.39985	2.63524	0	0.315826	4.01754	0.157913	4.58411
Sphk1	chr11	116530911	116532911	11.302	8.53102	0.0546037	0.753123	9.91652	0.403864	4.58406
Stk33	chr7	109438081	109440081	6.65563	4.28784	0	0.437298	5.47174	0.218649	4.58343
Stk33	chr7	109438081	109440081	6.65563	4.28784	0	0.437298	5.47174	0.218649	4.58343
Dlk1	chr12	109452455	109454455	9.16719	4.24318	0.273019	0.267237	6.70518	0.270128	4.58327
Cdx2	chr5	147306270	147308270	8.03699	5.3598	0.0546037	0.485886	6.69839	0.270245	4.58121
Gsc2	chr16	17914059	17916059	5.77658	3.39454	0.218415	0.145766	4.58556	0.18209	4.58038
Gm10006	chr12	82615925	82617925	7.28352	2.90323	0.163811	0.242943	5.09337	0.203377	4.57997
Irak3	chr10	120200498	120202498	1.88367	2.05459	0	0.145766	1.96913	0.0728829	4.57765
Shank3	chr15	89523322	89525322	6.40447	4.19851	0.109207	0.315826	5.30149	0.212517	4.57713
Nrg3	chr14	39471666	39473666	3.64176	1.74194	0.109207	0.0971772	2.69185	0.103192	4.5771
Gnao1	chr8	93810313	93812313	4.77196	3.21588	0	0.315826	3.99392	0.157913	4.57563
Gnal	chr18	67132826	67134826	7.66025	3.93052	0.0546037	0.413003	5.79539	0.233803	4.5736
2410017I17Rik	chr17	36144018	36146018	4.01849	1.7866	0.0546037	0.17006	2.90255	0.112332	4.57341
2410017I17Rik	chr17	36144018	36146018	4.01849	1.7866	0.0546037	0.17006	2.90255	0.112332	4.57341
Zfp579	chr7	4994340	4996340	11.1764	7.63772	0.163811	0.607358	9.40708	0.385584	4.57322
Pax6	chr2	105675128	105677128	5.77658	5.3598	0.109207	0.34012	5.56819	0.224664	4.57113
Pax6	chr2	105675129	105677129	5.77658	5.3598	0.109207	0.34012	5.56819	0.224664	4.57113
Hhex	chr19	37435739	37437739	12.5578	8.66501	0	0.874595	10.6114	0.437298	4.5696
Rbfox3	chr11	118907005	118909005	19.7157	7.63772	0.600641	0.534475	13.6767	0.567558	4.56667
Bean1	chr8	104169513	104171513	3.3906	3.39454	0	0.267237	3.39257	0.133619	4.56631
Bean1	chr8	104169513	104171513	3.3906	3.39454	0	0.267237	3.39257	0.133619	4.56631
Bean1	chr8	104169513	104171513	3.3906	3.39454	0	0.267237	3.39257	0.133619	4.56631
Bean1	chr8	104169513	104171513	3.3906	3.39454	0	0.267237	3.39257	0.133619	4.56631
Slc6a20a	chr9	123677782	123679782	17.0786	6.3871	0.43683	0.534475	11.7328	0.485652	4.56631
Adad1	chr3	37062678	37064678	5.65101	2.85856	0	0.34012	4.25478	0.17006	4.56592
Sox14	chr9	99875170	99877170	7.4091	4.24318	0.109207	0.364415	5.82614	0.236811	4.56354
Pax8	chr2	24474564	24476564	7.53467	3.97519	0.0546037	0.413003	5.75493	0.233803	4.56351
Pax8	chr2	24474574	24476574	7.53467	3.97519	0.0546037	0.413003	5.75493	0.233803	4.56351
Pax8	chr2	24474574	24476574	7.53467	3.97519	0.0546037	0.413003	5.75493	0.233803	4.56351
Pax6	chr2	105674513	105676513	7.66025	5.85112	0.163811	0.388709	6.75569	0.27626	4.56284
Slc7a10	chr7	35185421	35187421	10.5485	3.52854	0.382226	0.194354	7.03854	0.28829	4.56254
Vstm2b	chr7	40898278	40900278	2.51156	1.38462	0	0.145766	1.94809	0.0728829	4.56223
Phox2a	chr7	101817313	101819313	8.16256	3.03722	0.163811	0.291532	5.59989	0.227671	4.56093
Pcdha1	chr18	37089136	37091136	14.0647	4.28784	0.273019	0.485886	9.17628	0.379452	4.55996
Slc6a20a	chr9	123677806	123679806	16.5763	6.20844	0.43683	0.51018	11.3924	0.473505	4.55966
Cidea	chr18	67342583	67344583	5.77658	3.26055	0	0.364415	4.51857	0.182207	4.55832
Tpm2	chr4	43522765	43524765	7.66025	3.66253	0	0.461592	5.66139	0.230796	4.55782
Sorcs1	chr19	50677485	50679485	2.2604	2.18859	0	0.17006	2.22449	0.0850301	4.55542
Tmem163	chr1	127677096	127679096	9.6695	4.33251	0.382226	0.194354	7.001	0.28829	4.55483
Tmem163	chr1	127677096	127679096	9.6695	4.33251	0.382226	0.194354	7.001	0.28829	4.55483
Nkx2-3	chr19	43611325	43613325	10.423	5.71712	0.327622	0.34012	8.07005	0.333871	4.55442
Rpl10l	chr12	66283401	66285401	4.14407	0.580645	0.109207	0.0728829	2.36236	0.0910452	4.55325
Nrg3	chr14	39471825	39473825	3.64176	1.65261	0.109207	0.0971772	2.64718	0.103192	4.55305
Notum	chr11	120659606	120661606	4.5208	3.48387	0.0546037	0.267237	4.00234	0.160921	4.55305
Tbr1	chr2	61805273	61807273	21.3482	9.87097	0.655245	0.655946	15.6096	0.655595	4.55257
Kif19a	chr11	114764388	114766388	5.39985	3.17122	0.0546037	0.291532	4.28553	0.173068	4.55239
Kif19a	chr11	114764388	114766388	5.39985	3.17122	0.0546037	0.291532	4.28553	0.173068	4.55239
Kif19a	chr11	114764388	114766388	5.39985	3.17122	0.0546037	0.291532	4.28553	0.173068	4.55239
Kif19a	chr11	114764389	114766389	5.39985	3.17122	0.0546037	0.291532	4.28553	0.173068	4.55239
Rnf39	chr17	36941918	36943918	11.9299	5.89578	0.327622	0.413003	8.91284	0.370313	4.55225
Stk33	chr7	109437998	109439998	7.03236	4.24318	0	0.461592	5.63777	0.230796	4.5518
Igfbpl1	chr4	45825923	45827923	17.9576	6.83375	0.382226	0.655946	12.3957	0.519086	4.55136
Sgpp1	chr12	75734729	75736729	5.02312	1.83127	0.0546037	0.218649	3.42719	0.136626	4.55102
Shox2	chr3	66980141	66982141	9.6695	5.98511	0.382226	0.267237	7.82731	0.324732	4.54928
Irf5	chr6	29525625	29527625	7.03236	4.06452	0.163811	0.291532	5.54844	0.227671	4.54764
Igf2	chr7	142656466	142658466	3.3906	3.30521	0	0.267237	3.34791	0.133619	4.54725
Igf2	chr7	142656496	142658496	3.3906	3.30521	0	0.267237	3.34791	0.133619	4.54725
Cped1	chr6	21985596	21987596	5.77658	2.05459	0	0.315826	3.91559	0.157913	4.54712
Bnc2	chr4	84674027	84676027	3.51618	1.47395	0	0.194354	2.49506	0.0971772	4.54678
Bnc2	chr4	84674034	84676034	3.51618	1.47395	0	0.194354	2.49506	0.0971772	4.54678
Gm53	chr11	96250105	96252105	6.2789	3.66253	0.163811	0.242943	4.97071	0.203377	4.54488
Wnt9a	chr11	59305928	59307928	5.39985	4.82382	0.0546037	0.364415	5.11184	0.209509	4.54431
Wnt9a	chr11	59305930	59307930	5.39985	4.82382	0.0546037	0.364415	5.11184	0.209509	4.54431
Zfyve28	chr5	34287437	34289437	1.88367	2.23325	0.109207	0.0485886	2.05846	0.078898	4.54026
Zfyve28	chr5	34287449	34289449	1.88367	2.23325	0.109207	0.0485886	2.05846	0.078898	4.54026
Gng4	chr13	13783329	13785329	6.40447	2.23325	0.109207	0.242943	4.31886	0.176075	4.54003
Lama3	chr18	12333024	12335024	7.91141	1.42928	0.163811	0.218649	4.67034	0.19123	4.5397
Col12a1	chr9	79717678	79719678	5.90216	3.5732	0.218415	0.17006	4.73768	0.194237	4.5389
Npdc1	chr2	25399469	25401469	6.40447	3.21588	0.0546037	0.34012	4.81018	0.197362	4.53886
Prox1	chr1	190169237	190171237	5.39985	1.25062	0	0.267237	3.32524	0.133619	4.53747
Ddah1	chr3	145757675	145759675	7.28352	3.30521	0	0.437298	5.29437	0.218649	4.53598
Efcc1	chr6	87729869	87731869	8.03699	2.94789	0.163811	0.291532	5.49244	0.227671	4.53303
Efcc1	chr6	87729869	87731869	8.03699	2.94789	0.163811	0.291532	5.49244	0.227671	4.53303
Efcc1	chr6	87729893	87731893	8.03699	2.94789	0.163811	0.291532	5.49244	0.227671	4.53303
A830092H15Rik	chr3	26330150	26332150	8.28814	2.41191	0.273019	0.17006	5.35003	0.221539	4.53291
Homer2	chr7	81705925	81707925	2.38598	1.42928	0	0.145766	1.90763	0.0728829	4.53211
Pax6	chr2	105674527	105676527	6.78121	5.31514	0.163811	0.34012	6.04817	0.251966	4.53143
Alk	chr17	72602709	72604709	5.52543	1.9206	0.109207	0.194354	3.72301	0.151781	4.52823
Pax6	chr2	105674191	105676191	10.423	7.95037	0.218415	0.558769	9.18667	0.388592	4.52813
Pax6	chr2	105674191	105676191	10.423	7.95037	0.218415	0.558769	9.18667	0.388592	4.52813
Cav1	chr6	17305335	17307335	5.02312	2.14392	0	0.291532	3.58352	0.145766	4.52795
Cav1	chr6	17305345	17307345	5.02312	2.14392	0	0.291532	3.58352	0.145766	4.52795
Osr2	chr15	35295098	35297098	14.567	6.74442	0.273019	0.631652	10.6557	0.452335	4.5279
Abcg4	chr9	44287615	44289615	4.5208	2.63524	0	0.291532	3.57802	0.145766	4.52574
Skor1	chr9	63145980	63147980	13.1857	5.27047	0.273019	0.51018	9.22808	0.391599	4.52376
Tnxb	chr17	34669535	34671535	7.28352	3.34988	0.0546037	0.388709	5.3167	0.221656	4.52318
Tnxb	chr17	34669535	34671535	7.28352	3.34988	0.0546037	0.388709	5.3167	0.221656	4.52318
Csmd1	chr8	17534377	17536377	5.90216	5.13648	0.218415	0.242943	5.51932	0.230679	4.52192
Esr2	chr12	76176259	76178259	6.02774	1.38462	0.109207	0.194354	3.70618	0.151781	4.52171
Esr2	chr12	76176259	76178259	6.02774	1.38462	0.109207	0.194354	3.70618	0.151781	4.52171
Esr2	chr12	76176259	76178259	6.02774	1.38462	0.109207	0.194354	3.70618	0.151781	4.52171
Palm2	chr4	57433247	57435247	7.53467	4.33251	0.327622	0.17006	5.93359	0.248841	4.5212
Gmppa	chr1	75422510	75424510	5.77658	3.43921	0.163811	0.218649	4.6079	0.19123	4.52032
Asic4	chr1	75449436	75451436	3.64176	2.36725	0	0.242943	3.0045	0.121472	4.5191
Samd14	chr11	95008879	95010879	4.01849	2.54591	0	0.267237	3.2822	0.133619	4.51874
Samd14	chr11	95008882	95010882	4.01849	2.54591	0	0.267237	3.2822	0.133619	4.51874
Pax6	chr2	105674109	105676109	10.6741	8.08437	0.218415	0.583063	9.37925	0.400739	4.51472
Hoxb3	chr11	96327062	96329062	12.8089	8.30769	0.273019	0.631652	10.5583	0.452335	4.51466
Ppara	chr15	85734564	85736564	4.01849	3.08189	0	0.291532	3.55019	0.145766	4.5145
Ppp1r1b	chr11	98350215	98352215	19.4646	9.82631	0.218415	1.04466	14.6454	0.631535	4.51376
Fam65b	chr13	24637648	24639648	9.04161	4.28784	0.273019	0.291532	6.66473	0.282275	4.51331
Fam65b	chr13	24637650	24639650	9.04161	4.28784	0.273019	0.291532	6.66473	0.282275	4.51331
Wnt11	chr7	98834131	98836131	11.8043	5.40447	0.273019	0.461592	8.6044	0.367305	4.51295
Wnt11	chr7	98834112	98836112	11.8043	5.3598	0.273019	0.461592	8.58206	0.367305	4.5092
Wnt11	chr7	98834112	98836112	11.8043	5.3598	0.273019	0.461592	8.58206	0.367305	4.5092
Foxo6	chr4	120286349	120288349	3.89292	3.17122	0	0.291532	3.53207	0.145766	4.50714
Prtn3	chr10	79880783	79882783	10.7997	4.82382	0.109207	0.558769	7.81176	0.333988	4.50706
Adamtsl5	chr10	80344238	80346238	12.4322	8.84367	0.163811	0.753123	10.6379	0.458467	4.50648
Myo6	chr9	80164031	80166031	3.64176	1.20596	0	0.194354	2.42386	0.0971772	4.50517
Myo6	chr9	80164040	80166040	3.64176	1.20596	0	0.194354	2.42386	0.0971772	4.50517
Pax8	chr2	24474599	24476599	7.53467	4.06452	0.0546037	0.437298	5.7996	0.245951	4.5045
Arhgef26	chr3	62340101	62342101	9.6695	2.72457	0.163811	0.364415	6.19703	0.264113	4.50106
Cadps2	chr6	23838137	23840137	10.2974	2.50124	0.327622	0.218649	6.39932	0.273136	4.50061
Cadps2	chr6	23838137	23840137	10.2974	2.50124	0.327622	0.218649	6.39932	0.273136	4.50061
Cadps2	chr6	23838143	23840143	10.2974	2.50124	0.327622	0.218649	6.39932	0.273136	4.50061
Cadps2	chr6	23838143	23840143	10.2974	2.50124	0.327622	0.218649	6.39932	0.273136	4.50061
Olig2	chr16	91224550	91226550	5.52543	5.62779	0.109207	0.364415	5.57661	0.236811	4.50049
Adcy9	chr16	4418587	4420587	3.01387	2.36725	0	0.218649	2.69056	0.109324	4.5003
Slc6a20a	chr9	123677885	123679885	16.5763	6.52109	0.491433	0.51018	11.5487	0.500807	4.50006
Tbx18	chr9	87730260	87732260	5.77658	3.03722	0.0546037	0.315826	4.4069	0.185215	4.4999
Ecel1	chr1	87155165	87157165	12.0555	10.6303	0.327622	0.655946	11.3429	0.491784	4.49985
Abcc8	chr7	46179033	46181033	5.52543	2.18859	0.0546037	0.267237	3.85701	0.160921	4.49982
Nr3c2	chr8	76898772	76900772	4.89754	2.6799	0	0.315826	3.78872	0.157913	4.49973
Zfp536	chr7	37769980	37771980	3.26503	1.56328	0	0.194354	2.41415	0.0971772	4.49941
Pag1	chr3	9832363	9834363	3.26503	1.69727	0.0546037	0.145766	2.48115	0.100185	4.49881
Pax6	chr2	105674946	105676946	5.27427	5.31514	0.109207	0.34012	5.29471	0.224664	4.49861
Hrk	chr5	118168764	118170764	5.90216	2.90323	0.0546037	0.315826	4.40269	0.185215	4.49853
Lhx6	chr2	36104255	36106255	22.2273	10.407	0.600641	0.826006	16.3171	0.713324	4.49649
2010300C02Rik	chr1	37719085	37721085	4.01849	2.99256	0	0.291532	3.50552	0.145766	4.49629
Ppara	chr15	85734639	85736639	4.01849	2.99256	0	0.291532	3.50552	0.145766	4.49629
Dlx1	chr2	71527113	71529113	11.0509	7.19107	0.327622	0.461592	9.12096	0.394607	4.49617
Slc7a10	chr7	35185385	35187385	10.5485	3.43921	0.382226	0.218649	6.99388	0.300437	4.49578
Slc7a10	chr7	35185385	35187385	10.5485	3.43921	0.382226	0.218649	6.99388	0.300437	4.49578
Wnt7b	chr15	85577070	85579070	19.9669	12.7742	0.655245	0.777418	16.3705	0.716331	4.49521
Nkx2-2	chr2	147185402	147187402	10.1718	5.44913	0.382226	0.291532	7.81047	0.336879	4.49475
Nkx2-2	chr2	147185402	147187402	10.1718	5.44913	0.382226	0.291532	7.81047	0.336879	4.49475
Dnaja4	chr9	54697873	54699873	10.423	4.64516	0.382226	0.267237	7.53406	0.324732	4.49427
Skor1	chr9	63146011	63148011	12.8089	5.27047	0.273019	0.51018	9.03971	0.391599	4.49404
Coro1a	chr7	126703547	126705547	3.51618	1.42928	0.0546037	0.145766	2.47273	0.100185	4.49393
Tfap2e	chr4	126735240	126737240	12.6834	6.34243	0.43683	0.388709	9.5129	0.412769	4.49346
Syt6	chr3	103574231	103576231	5.52543	4.06452	0.163811	0.242943	4.79497	0.203377	4.49305
4930412O13Rik	chr2	9880252	9882252	10.2974	3.79653	0.218415	0.388709	7.04696	0.303562	4.49222
Ccnd2	chr6	127150048	127152048	6.02774	2.05459	0	0.34012	4.04117	0.17006	4.49179
Tex15	chr8	33516324	33518324	9.16719	2.18859	0.218415	0.267237	5.67789	0.242826	4.49168
Tex15	chr8	33516324	33518324	9.16719	2.18859	0.218415	0.267237	5.67789	0.242826	4.49168
Lbx2	chr6	83085365	83087365	9.54392	5.76179	0.273019	0.388709	7.65285	0.330864	4.49062
Cacna1i	chr15	80286534	80288534	7.28352	4.33251	0.109207	0.388709	5.80801	0.248958	4.48974
Dll4	chr2	119324784	119326784	1.88367	2.50124	0.0546037	0.121472	2.19246	0.0880376	4.48963
Rnf39	chr17	36942055	36944055	12.8089	6.43176	0.327622	0.51018	9.62036	0.418901	4.48887
Tlx1	chr19	45148236	45150236	12.4322	5.98511	0.43683	0.364415	9.20866	0.400622	4.48867
Pcdhb12	chr18	37434621	37436621	6.53005	1.11663	0.0546037	0.267237	3.82334	0.160921	4.4872
Gm10545	chr18	36996880	36998880	11.0509	5.00248	0.163811	0.534475	8.02667	0.349143	4.48397
Abcg4	chr9	44287357	44289357	4.26965	2.6799	0	0.291532	3.47478	0.145766	4.48361
Helt	chr8	46293671	46295671	11.5532	5.98511	0.327622	0.437298	8.76914	0.38246	4.48346
Pou3f3	chr1	42696146	42698146	5.27427	3.5732	0.109207	0.267237	4.42374	0.188222	4.48333
Six6	chr12	72936977	72938977	8.16256	3.12655	0	0.485886	5.64456	0.242943	4.48253
Wnt2	chr6	18029585	18031585	11.6787	6.3871	0.327622	0.461592	9.03292	0.394607	4.4822
Igf2	chr7	142660870	142662870	19.4646	8.35236	0.764452	0.461592	13.9085	0.613022	4.48157
Kbtbd13	chr9	65390652	65392652	9.29277	4.28784	0.273019	0.315826	6.7903	0.294422	4.48145
Samd1	chr8	83996672	83998672	0.879045	0.08933	0	0.0242943	0.484188	0.0121472	4.47987
Wnt2	chr6	18029410	18031410	10.7997	5.04715	0.327622	0.364415	7.92342	0.346018	4.47792
Glis3	chr19	28677690	28679690	11.302	7.63772	0.273019	0.558769	9.46987	0.415894	4.4763
Glis3	chr19	28677690	28679690	11.302	7.63772	0.273019	0.558769	9.46987	0.415894	4.4763
Gm16140	chr11	18873309	18875309	18.0832	7.59305	0.600641	0.534475	12.8381	0.567558	4.47545
Igf2	chr7	142660305	142662305	14.567	7.19107	0.546037	0.413003	10.8791	0.47952	4.47537
Mapt	chr11	104230484	104232484	6.02774	2.90323	0.163811	0.218649	4.46548	0.19123	4.47513
Gsc	chr12	104472327	104474327	6.65563	3.08189	0.273019	0.145766	4.86876	0.209392	4.47493
Tex40	chr19	6924380	6926380	11.1764	7.72705	0.491433	0.34012	9.45174	0.415777	4.47394
Tbr1	chr2	61805262	61807262	21.3482	9.9603	0.709848	0.680241	15.6543	0.695044	4.47362
Ripply3	chr16	94327420	94329420	10.2974	4.55583	0.163811	0.485886	7.42661	0.324849	4.47306
Cryba2	chr1	74891732	74893732	8.28814	6.29777	0.0546037	0.583063	7.29296	0.318834	4.47305
St8sia6	chr2	13792293	13794293	7.91141	3.97519	0.0546037	0.461592	5.9433	0.258098	4.47286
Syt6	chr3	103574281	103576281	5.52543	3.93052	0.163811	0.242943	4.72798	0.203377	4.47279
Syt6	chr3	103574282	103576282	5.52543	3.93052	0.163811	0.242943	4.72798	0.203377	4.47279
Csmd1	chr8	17534586	17536586	5.39985	5.53846	0.109207	0.364415	5.46916	0.236811	4.47248
Arhgef26	chr3	62339390	62341390	10.0462	2.90323	0.273019	0.291532	6.47473	0.282275	4.47165
Cntnap1	chr11	101175041	101177041	9.79508	3.52854	0.218415	0.364415	6.66181	0.291415	4.46826
Col12a1	chr9	79717720	79719720	6.02774	3.52854	0.218415	0.194354	4.77814	0.206385	4.46779
Col12a1	chr9	79717720	79719720	6.02774	3.52854	0.218415	0.194354	4.77814	0.206385	4.46779
Lhx6	chr2	36104408	36106408	20.8459	9.37966	0.546037	0.801712	15.1128	0.673875	4.46685
Lhx6	chr2	36104408	36106408	20.8459	9.37966	0.546037	0.801712	15.1128	0.673875	4.46685
Notum	chr11	120659829	120661829	4.14407	3.39454	0.0546037	0.267237	3.76931	0.160921	4.46672
Zfp503	chr14	21988601	21990601	6.2789	4.06452	0.109207	0.34012	5.17171	0.224664	4.46476
Gm3573	chr14	42161622	42163622	0.376734	0.044665	0	0	0.210699	0	4.46401
Tcf21	chr10	22819128	22821128	13.8136	6.02978	0.491433	0.388709	9.92167	0.440071	4.46381
Phospho1	chr11	95829763	95831763	7.15794	3.17122	0.327622	0.121472	5.16458	0.224547	4.46349
Dll4	chr2	119324564	119326564	1.75809	2.54591	0.0546037	0.121472	2.152	0.0880376	4.46289
Skor1	chr9	63147961	63149961	5.90216	2.41191	0.163811	0.194354	4.15704	0.179083	4.46193
Sobp	chr10	43173530	43175530	5.90216	4.28784	0.0546037	0.388709	5.095	0.221656	4.46185
Pvalb	chr15	78203237	78205237	4.5208	1.51861	0.109207	0.145766	3.01971	0.127487	4.46182
Asxl3	chr18	22344089	22346089	12.1811	2.54591	0.382226	0.267237	7.36348	0.324732	4.46127
Asxl3	chr18	22344089	22346089	12.1811	2.54591	0.382226	0.267237	7.36348	0.324732	4.46127
Col12a1	chr9	79717831	79719831	6.02774	3.48387	0.218415	0.194354	4.75581	0.206385	4.46105
Zfp579	chr7	4995055	4997055	9.54392	6.2531	0.163811	0.534475	7.89851	0.349143	4.46078
Syt6	chr3	103574378	103576378	5.39985	3.97519	0.163811	0.242943	4.68752	0.203377	4.46042
Syt6	chr3	103574378	103576378	5.39985	3.97519	0.163811	0.242943	4.68752	0.203377	4.46042
Kcnq1	chr7	143106254	143108254	7.53467	4.10918	0.218415	0.291532	5.82193	0.254973	4.46005
Fam189a2	chr19	24030019	24032019	4.64638	1.38462	0.109207	0.145766	3.0155	0.127487	4.45981
Fam78a	chr2	32082783	32084783	10.9253	4.95782	0.43683	0.267237	7.94155	0.352034	4.45704
Nr2e1	chr10	42579774	42581774	7.91141	3.7072	0.218415	0.291532	5.8093	0.254973	4.45693
Nol4	chr18	23037939	23039939	9.04161	6.43176	0.273019	0.413003	7.73669	0.343011	4.45579
Prox1	chr1	190169680	190171680	7.91141	2.36725	0.109207	0.34012	5.13933	0.224664	4.45572
Ccdc3	chr2	5136776	5138776	7.28352	2.59057	0.163811	0.267237	4.93705	0.215524	4.45521
Podn	chr4	108030953	108032953	11.8043	3.26055	0.327622	0.34012	7.53244	0.333871	4.45509
Podn	chr4	108030954	108032954	11.8043	3.26055	0.327622	0.34012	7.53244	0.333871	4.45509
Mapt	chr11	104230479	104232479	5.90216	2.90323	0.163811	0.218649	4.40269	0.19123	4.45474
Mcoln2	chr3	146149174	146151174	2.76271	1.38462	0	0.17006	2.07366	0.0850301	4.4546
Fgf3	chr7	144837595	144839595	6.90679	3.61787	0.218415	0.242943	5.26233	0.230679	4.45326
Fxyd7	chr7	31050462	31052462	10.1718	4.73449	0.273019	0.388709	7.45315	0.330864	4.45252
Stau2	chr1	16518247	16520247	2.00925	0.53598	0	0.0971772	1.27261	0.0485886	4.45232
Stau2	chr1	16518253	16520253	2.00925	0.53598	0	0.0971772	1.27261	0.0485886	4.45232
Samd11	chr4	156254338	156256338	6.90679	1.87593	0.163811	0.218649	4.39136	0.19123	4.45103
Zfp800	chr6	28260932	28262932	6.53005	4.37717	0.163811	0.315826	5.45361	0.239819	4.4509
2810459M11Rik	chr1	86045268	86047268	7.53467	4.82382	0.109207	0.437298	6.17925	0.273252	4.4496
Kcnk9	chr15	72545279	72547279	8.5393	5.40447	0.327622	0.291532	6.97188	0.309577	4.44938
Hs3st4	chr7	123981869	123983869	0.62789	0.848635	0	0.0485886	0.738263	0.0242943	4.4475
Col2a1	chr15	98003695	98005695	2.51156	2.14392	0	0.194354	2.32774	0.0971772	4.44704
Irx6	chr8	92673826	92675826	3.64176	3.39454	0.109207	0.194354	3.51815	0.151781	4.4468
Igf2	chr7	142660205	142662205	16.074	7.50372	0.600641	0.461592	11.7888	0.531116	4.44656
Gm13283	chr4	88759774	88761774	5.90216	2.32258	0.163811	0.194354	4.11237	0.179083	4.44638
Pax9	chr12	56690767	56692767	12.6834	5.98511	0.546037	0.291532	9.33424	0.418784	4.44575
Lhx6	chr2	36104271	36106271	21.2227	10.273	0.600641	0.826006	15.7478	0.713324	4.44528
Epha7	chr4	28812250	28814250	1.63251	1.42928	0	0.121472	1.5309	0.0607358	4.44519
Gdf6	chr4	9843372	9845372	6.90679	2.23325	0.109207	0.291532	4.57002	0.20037	4.44436
Ppara	chr15	85734776	85736776	3.64176	2.59057	0	0.267237	3.11617	0.133619	4.44408
Cebpa	chr7	35118293	35120293	2.13482	2.76923	0.109207	0.0971772	2.45203	0.103192	4.443
Ppara	chr15	85735131	85737131	4.77196	3.17122	0.0546037	0.291532	3.97159	0.173068	4.4429
D1Ertd622e	chr1	97661074	97663074	1.75809	1.42928	0.0546037	0.0728829	1.59369	0.0637433	4.44274
D1Ertd622e	chr1	97661074	97663074	1.75809	1.42928	0.0546037	0.0728829	1.59369	0.0637433	4.44274
Dcdc2a	chr13	25055253	25057253	6.53005	3.39454	0	0.437298	4.9623	0.218649	4.44271
Six2	chr17	85687254	85689254	3.51618	1.65261	0	0.218649	2.58439	0.109324	4.44244
Zfp579	chr7	4995029	4997029	9.29277	6.29777	0.163811	0.534475	7.79527	0.349143	4.44182
Cacna1i	chr15	80286238	80288238	6.02774	4.01985	0.0546037	0.388709	5.0238	0.221656	4.44159
Nr2f1	chr13	78196930	78198930	8.66488	3.88586	0.218415	0.34012	6.27537	0.279268	4.44152
Arpp21	chr9	112231501	112233501	6.65563	2.45658	0.109207	0.291532	4.5561	0.20037	4.43997
Atoh8	chr6	72234577	72236577	9.04161	4.01985	0.218415	0.364415	6.53073	0.291415	4.43963
Hlx	chr1	184731619	184733619	6.40447	4.01985	0	0.461592	5.21216	0.230796	4.43876
Cpeb2	chr5	43232956	43234956	0.62789	0.312655	0	0.0242943	0.470272	0.0121472	4.43866
Cpeb2	chr5	43232956	43234956	0.62789	0.312655	0	0.0242943	0.470272	0.0121472	4.43866
Rin3	chr12	102282641	102284641	2.51156	2.63524	0	0.218649	2.5734	0.109324	4.43631
Siah2	chr3	58691400	58693400	6.02774	4.10918	0.109207	0.34012	5.06846	0.224664	4.43572
Aldh1a3	chr7	66426517	66428517	5.77658	3.03722	0.218415	0.17006	4.4069	0.194237	4.43472
Hecw2	chr1	54194168	54196168	6.2789	2.14392	0.0546037	0.315826	4.21141	0.185215	4.43459
Zfyve28	chr5	34287326	34289326	1.63251	2.18859	0.109207	0.0485886	1.91055	0.078898	4.43322
Zic1	chr9	91364810	91366810	4.01849	3.21588	0	0.315826	3.61719	0.157913	4.43307
Nr2e1	chr10	42582822	42584822	7.91141	4.82382	0.327622	0.242943	6.36762	0.285283	4.43285
Nr2e1	chr10	42582835	42584835	7.91141	4.82382	0.327622	0.242943	6.36762	0.285283	4.43285
Nr2e1	chr10	42582838	42584838	7.91141	4.82382	0.327622	0.242943	6.36762	0.285283	4.43285
Pmp22	chr11	63132068	63134068	4.5208	3.88586	0.0546037	0.315826	4.20333	0.185215	4.43183
Lingo2	chr4	36951966	36953966	10.1718	4.51117	0.491433	0.17006	7.34149	0.330747	4.43126
Htr6	chr4	139073789	139075789	11.5532	5.22581	0.273019	0.485886	8.38949	0.379452	4.43078
Podn	chr4	108031337	108033337	12.6834	3.17122	0.327622	0.388709	7.92729	0.358166	4.43022
Lipg	chr18	74960263	74962263	4.77196	3.61787	0.0546037	0.315826	4.19491	0.185215	4.42894
Parp10	chr15	76230378	76232378	7.03236	3.84119	0	0.485886	5.43678	0.242943	4.42852
Zic4	chr9	91370213	91372213	14.4415	6.20844	0.600641	0.34012	10.3249	0.470381	4.42721
H2afy	chr13	56135361	56137361	7.4091	3.7072	0.109207	0.388709	5.55815	0.248958	4.42641
Dmrt2	chr19	25671420	25673420	10.0462	5.89578	0.163811	0.558769	7.97101	0.36129	4.42595
Lhx3	chr2	26202441	26204441	23.1063	7.77171	0.764452	0.655946	15.439	0.710199	4.42298
Dmrt1	chr19	25504706	25506706	6.90679	4.82382	0.163811	0.364415	5.8653	0.264113	4.42182
Dmrt1	chr19	25504707	25506707	6.90679	4.82382	0.163811	0.364415	5.8653	0.264113	4.42182
Dmbx1	chr4	115938926	115940926	8.03699	3.17122	0.163811	0.34012	5.6041	0.251966	4.42161
Dmbx1	chr4	115938926	115940926	8.03699	3.17122	0.163811	0.34012	5.6041	0.251966	4.42161
Dll4	chr2	119324543	119326543	1.63251	2.54591	0.0546037	0.121472	2.08921	0.0880376	4.42037
Dpf3	chr12	83486716	83488716	5.77658	1.38462	0.218415	0.0971772	3.5806	0.157796	4.41944
Pde4a	chr9	21164714	21166714	4.77196	3.17122	0.109207	0.242943	3.97159	0.176075	4.41939
Laptm4b	chr15	34237026	34239026	3.51618	3.12655	0	0.291532	3.32137	0.145766	4.41866
Cadps2	chr6	23838224	23840224	9.29277	2.27792	0.327622	0.194354	5.78534	0.260988	4.41859
Cpeb1	chr7	81453758	81455758	6.02774	2.8139	0.273019	0.121472	4.42082	0.197245	4.41816
Cpeb1	chr7	81453758	81455758	6.02774	2.8139	0.273019	0.121472	4.42082	0.197245	4.41816
Syt10	chr15	89840860	89842860	3.13945	2.59057	0.0546037	0.194354	2.86501	0.124479	4.41811
Gabra5	chr7	57509009	57511009	8.5393	3.79653	0.218415	0.34012	6.16791	0.279268	4.41664
Shcbp1l	chr1	153424162	153426162	7.66025	4.15385	0.218415	0.315826	5.90705	0.26712	4.41629
Htra4	chr8	25036052	25038052	13.3113	5.62779	0.382226	0.485886	9.46953	0.434056	4.416
Pacsin1	chr17	27684197	27686197	4.26965	0.80397	0	0.218649	2.53681	0.109324	4.41573
Gad1	chr2	70561899	70563899	10.2974	6.16377	0.43683	0.315826	8.23058	0.376328	4.41485
Esrrg	chr1	187607791	187609791	10.9253	7.72705	0.491433	0.364415	9.32616	0.427924	4.41408
Hoxa7	chr6	52216452	52218452	18.8367	8.70968	0.764452	0.51018	13.7732	0.637316	4.41229
Tiam2	chr17	3325573	3327573	7.78583	3.08189	0.273019	0.218649	5.43386	0.245834	4.41135
Ppp1r1b	chr11	98350489	98352489	17.8321	8.933	0.218415	1.02036	13.3825	0.619388	4.41134
Acot6	chr12	84099654	84101654	5.14869	3.26055	0.109207	0.267237	4.20462	0.188222	4.41021
H60b	chr10	22272346	22274346	4.77196	1.83127	0	0.291532	3.30161	0.145766	4.41008
Dlx1	chr2	71528947	71530947	7.66025	5.00248	0.163811	0.413003	6.33137	0.288407	4.40944
Pdgfa	chr5	138993484	138995484	2.2604	0.848635	0.0546037	0.0728829	1.55452	0.0637433	4.40706
Zic4	chr9	91370350	91372350	14.567	6.29777	0.600641	0.364415	10.4324	0.482528	4.40611
AI118078	chr9	55325844	55327844	7.53467	2.76923	0.0546037	0.413003	5.15195	0.233803	4.40413
Cplx2	chr13	54370349	54372349	4.5208	2.05459	0	0.291532	3.2877	0.145766	4.40401
Cadps2	chr6	23838225	23840225	9.16719	2.27792	0.327622	0.194354	5.72255	0.260988	4.40287
Hoxc8	chr15	102997257	102999257	17.4553	5.67246	0.709848	0.364415	11.5639	0.537131	4.40284
G630090E17Rik	chr10	39959153	39961153	5.39985	1.29529	0.0546037	0.242943	3.34757	0.148773	4.40238
Barhl1	chr2	28914505	28916505	7.15794	4.28784	0.109207	0.413003	5.72289	0.261105	4.40234
Kcnab3	chr11	69326866	69328866	11.302	4.51117	0	0.728829	7.90659	0.364415	4.40217
Rprml	chr11	103648509	103650509	5.65101	2.32258	0.163811	0.194354	3.98679	0.179083	4.40175
Emx2	chr19	59461802	59463802	19.2134	11.0769	0.928263	0.485886	15.1452	0.707075	4.40154
Abcg4	chr9	44287138	44289138	5.65101	3.21588	0.109207	0.291532	4.43344	0.20037	4.40068
Csmd1	chr8	17534385	17536385	5.90216	5.27047	0.218415	0.291532	5.58632	0.254973	4.40056
Fam81a	chr9	70140803	70142803	5.52543	2.05459	0.218415	0.121472	3.79001	0.169943	4.40039
Zbtb16	chr9	48834945	48836945	6.53005	3.61787	0	0.461592	5.07396	0.230796	4.40007
Hnf1b	chr11	83849063	83851063	4.01849	3.30521	0.109207	0.218649	3.66185	0.163928	4.39995
Hoxa4	chr6	52183874	52185874	31.8968	14.2481	1.36509	0.801712	23.0725	1.0834	4.3999
Esam	chr9	37527781	37529781	9.6695	3.79653	0.327622	0.291532	6.73301	0.309577	4.39916
Shcbp1l	chr1	153424172	153426172	7.78583	4.37717	0.218415	0.34012	6.0815	0.279268	4.39632
Hoxd3	chr2	74726074	74728074	15.1949	7.19107	0.43683	0.607358	11.193	0.522094	4.39606
Slc10a4	chr5	73005904	73007904	6.15332	2.6799	0.109207	0.291532	4.41661	0.20037	4.3952
Unc45b	chr11	82927959	82929959	16.953	8.08437	0.709848	0.461592	12.5187	0.58572	4.39446
Dpf3	chr12	83486708	83488708	5.65101	1.38462	0.218415	0.0971772	3.51781	0.157796	4.39399
Kdr	chr5	75977458	75979458	6.40447	2.54591	0.163811	0.242943	4.47519	0.203377	4.39369
Kdr	chr5	75977458	75979458	6.40447	2.54591	0.163811	0.242943	4.47519	0.203377	4.39369
Gm996	chr2	25579099	25581099	8.28814	4.73449	0.382226	0.218649	6.51132	0.300437	4.39279
Fmnl1	chr11	103170313	103172313	5.90216	2.27792	0.0546037	0.315826	4.09004	0.185215	4.3925
Hecw2	chr1	54194034	54196034	5.14869	2.00993	0.0546037	0.267237	3.57931	0.160921	4.39231
Hecw2	chr1	54194034	54196034	5.14869	2.00993	0.0546037	0.267237	3.57931	0.160921	4.39231
Lphn3	chr5	81019996	81021996	9.41834	5.00248	0.327622	0.34012	7.21041	0.333871	4.39214
Tex12	chr9	50560268	50562268	7.28352	4.33251	0	0.534475	5.80801	0.267237	4.39133
Vash2	chr1	190977998	190979998	7.91141	1.7866	0.0546037	0.388709	4.849	0.221656	4.3906
Klhdc8a	chr1	132297626	132299626	10.6741	5.4938	0	0.753123	8.08396	0.376562	4.38808
Pax5	chr4	44710446	44712446	10.423	6.61042	0.382226	0.413003	8.5167	0.397615	4.38671
Epha7	chr4	28812131	28814131	1.50693	1.42928	0	0.121472	1.46811	0.0607358	4.38517
Epha7	chr4	28812131	28814131	1.50693	1.42928	0	0.121472	1.46811	0.0607358	4.38517
Epha7	chr4	28812152	28814152	1.50693	1.42928	0	0.121472	1.46811	0.0607358	4.38517
Dmrt1	chr19	25504618	25506618	6.65563	4.77916	0.163811	0.364415	5.71739	0.264113	4.38504
Zfp777	chr6	48046794	48048794	1.75809	0.669975	0	0.0971772	1.21403	0.0485886	4.38488
Rap1gap2	chr11	74589124	74591124	10.6741	5.94045	0.43683	0.34012	8.30729	0.388475	4.38355
Gad2	chr2	22622304	22624304	11.9299	5.94045	0.327622	0.51018	8.93518	0.418901	4.38239
Six2	chr17	85687274	85689274	3.3906	1.56328	0	0.218649	2.47694	0.109324	4.38141
Gata4	chr14	63270124	63272124	12.9345	5.53846	0.600641	0.267237	9.23649	0.433939	4.38047
Gata4	chr14	63270124	63272124	12.9345	5.53846	0.600641	0.267237	9.23649	0.433939	4.38047
Fam211b	chr10	75559330	75561330	11.5532	4.51117	0.218415	0.534475	8.03217	0.376445	4.37925
Fcho1	chr8	71724704	71726704	6.40447	1.56328	0	0.364415	3.98387	0.182207	4.37705
Pax8	chr2	24474215	24476215	6.90679	3.7072	0.0546037	0.437298	5.30699	0.245951	4.37667
Hoxa7	chr6	52216505	52218505	18.9623	8.88834	0.764452	0.558769	13.9253	0.66161	4.37498
Celf4	chr18	25752983	25754983	5.90216	2.54591	0.218415	0.17006	4.22403	0.194237	4.37371
Celf4	chr18	25752983	25754983	5.90216	2.54591	0.218415	0.17006	4.22403	0.194237	4.37371
Nr2f1	chr13	78197017	78199017	8.16256	3.79653	0.218415	0.34012	5.97955	0.279268	4.37197
Aldh1a2	chr9	71214789	71216789	6.65563	4.28784	0.218415	0.291532	5.47174	0.254973	4.37071
Mmp28	chr11	83462071	83464071	9.6695	4.28784	0	0.655946	6.97867	0.327973	4.37004
Mmp28	chr11	83462071	83464071	9.6695	4.28784	0	0.655946	6.97867	0.327973	4.37004
Hivep3	chr4	119732796	119734796	3.64176	0.8933	0.0546037	0.145766	2.26753	0.100185	4.36947
Cdkn2c	chr4	109653131	109655131	9.29277	4.64516	0.43683	0.218649	6.96896	0.327739	4.36903
Zfp800	chr6	28260911	28262911	6.78121	4.64516	0.218415	0.315826	5.71318	0.26712	4.36823
Zfp800	chr6	28260914	28262914	6.78121	4.64516	0.218415	0.315826	5.71318	0.26712	4.36823
Vwa5b2	chr16	20590156	20592156	11.8043	4.86849	0.546037	0.242943	8.33641	0.39449	4.36698
Hs3st6	chr17	24752003	24754003	5.02312	2.00993	0.0546037	0.267237	3.51652	0.160921	4.36685
Lhx3	chr2	26201866	26203866	22.2273	7.59305	0.819056	0.607358	14.9102	0.713207	4.36671
Ebf4	chr2	130294939	130296939	3.3906	3.26055	0.109207	0.194354	3.32558	0.151781	4.36582
Ebf4	chr2	130294939	130296939	3.3906	3.26055	0.109207	0.194354	3.32558	0.151781	4.36582
Ebf4	chr2	130294939	130296939	3.3906	3.26055	0.109207	0.194354	3.32558	0.151781	4.36582
Ebf4	chr2	130294939	130296939	3.3906	3.26055	0.109207	0.194354	3.32558	0.151781	4.36582
Ebf4	chr2	130294939	130296939	3.3906	3.26055	0.109207	0.194354	3.32558	0.151781	4.36582
Fev	chr1	74884419	74886419	9.16719	4.86849	0.273019	0.388709	7.01784	0.330864	4.36581
Mmp28	chr11	83461992	83463992	9.6695	4.24318	0	0.655946	6.95634	0.327973	4.36542
Mmp28	chr11	83462022	83464022	9.6695	4.24318	0	0.655946	6.95634	0.327973	4.36542
Dll4	chr2	119325194	119327194	2.00925	2.00993	0.0546037	0.121472	2.00959	0.0880376	4.36458
Tbx15	chr3	99239381	99241381	12.5578	5.58313	0.327622	0.534475	9.07046	0.431048	4.36376
A930017K11Rik	chr17	25951565	25953565	6.65563	2.23325	0.218415	0.194354	4.44444	0.206385	4.36357
Dnaja4	chr9	54698514	54700514	8.41372	6.34243	0.382226	0.315826	7.37808	0.349026	4.36304
Zfp579	chr7	4995085	4997085	9.41834	6.34243	0.163811	0.583063	7.88039	0.373437	4.36303
C1ql2	chr1	120339582	120341582	6.2789	4.73449	0.0546037	0.461592	5.50669	0.258098	4.36297
Ntn1	chr11	68399823	68401823	7.4091	7.10174	0.0546037	0.631652	7.25542	0.343128	4.36278
Hoxd1	chr2	74753455	74755455	12.8089	6.56576	0.43683	0.485886	9.68735	0.461358	4.3627
Gad1	chr2	70562442	70564442	12.6834	7.19107	0.43683	0.51018	9.93722	0.473505	4.36269
Vmn1r158	chr7	22789782	22791782	1.25578	0.133995	0	0.0485886	0.694887	0.0242943	4.36135
Msrb3	chr10	120898101	120900101	6.40447	3.21588	0.109207	0.34012	4.81018	0.224664	4.36042
Zic1	chr9	91364768	91366768	3.64176	2.23325	0	0.267237	2.93751	0.133619	4.35918
Zic4	chr9	91370004	91372004	13.5624	5.13648	0.600641	0.291532	9.34945	0.446086	4.35904
Trim34b	chr7	104300034	104302034	2.00925	0	0.0546037	0.0242943	1.00462	0.039449	4.35886
Fev	chr1	74884322	74886322	8.91603	5.04715	0.273019	0.388709	6.98159	0.330864	4.35835
Hivep3	chr4	119732841	119734841	3.51618	0.982631	0.0546037	0.145766	2.24941	0.100185	4.35795
Tpm1	chr9	67048186	67050186	9.79508	3.03722	0.218415	0.388709	6.41615	0.303562	4.35713
Tpm1	chr9	67048191	67050191	9.79508	3.03722	0.218415	0.388709	6.41615	0.303562	4.35713
Tpm1	chr9	67048201	67050201	9.79508	3.03722	0.218415	0.388709	6.41615	0.303562	4.35713
Mmp28	chr11	83461961	83463961	9.54392	4.28784	0	0.655946	6.91588	0.327973	4.35702
Dirc2	chr16	35658435	35660435	5.52543	2.32258	0	0.364415	3.924	0.182207	4.35526
6530409C15Rik	chr6	28214555	28216555	5.02312	2.32258	0	0.34012	3.67285	0.17006	4.35427
6530409C15Rik	chr6	28214576	28216576	5.02312	2.32258	0	0.34012	3.67285	0.17006	4.35427
Fcho1	chr8	71724647	71726647	6.2789	1.56328	0	0.364415	3.92109	0.182207	4.35419
Fcho1	chr8	71724666	71726666	6.2789	1.56328	0	0.364415	3.92109	0.182207	4.35419
Fcho1	chr8	71724666	71726666	6.2789	1.56328	0	0.364415	3.92109	0.182207	4.35419
Creb3l1	chr2	92058369	92060369	6.78121	2.54591	0.218415	0.218649	4.66356	0.218532	4.35405
Gnas	chr2	174326757	174328757	15.4461	6.78908	0.43683	0.631652	11.1176	0.534241	4.35375
Gnas	chr2	174326768	174328768	15.4461	6.78908	0.43683	0.631652	11.1176	0.534241	4.35375
Arhgap20	chr9	51764660	51766660	5.90216	1.56328	0.0546037	0.291532	3.73272	0.173068	4.35364
Sfmbt2	chr2	10369518	10371518	23.1063	12.1489	0.928263	0.777418	17.6276	0.85284	4.35342
Pax8	chr2	24474097	24476097	6.78121	3.66253	0.0546037	0.437298	5.22187	0.245951	4.35339
Espn	chr4	152151371	152153371	5.65101	2.6799	0	0.388709	4.16545	0.194354	4.35279
Tpm1	chr9	67048172	67050172	9.79508	2.99256	0.218415	0.388709	6.39382	0.303562	4.35211
Fam65b	chr13	24637696	24639696	9.41834	4.6005	0.327622	0.34012	7.00942	0.333871	4.35141
Nr2e1	chr10	42579345	42581345	7.66025	5.98511	0.163811	0.485886	6.82268	0.324849	4.35087
Cacna2d2	chr9	107399069	107401069	7.15794	1.65261	0.218415	0.194354	4.40527	0.206385	4.35083
Cacna2d2	chr9	107399069	107401069	7.15794	1.65261	0.218415	0.194354	4.40527	0.206385	4.35083
Dnaja4	chr9	54698559	54700559	8.28814	6.34243	0.382226	0.315826	7.31529	0.349026	4.35073
Kctd8	chr5	69340709	69342709	2.51156	0.848635	0	0.145766	1.6801	0.0728829	4.34989
Pax2	chr19	44755049	44757049	2.2604	4.06452	0	0.291532	3.16246	0.145766	4.34815
Arfgap3	chr15	83366011	83368011	6.2789	4.24318	0.109207	0.388709	5.26104	0.248958	4.3473
Zfp322a	chr13	23312400	23314400	9.29277	5.67246	0.327622	0.388709	7.48261	0.358166	4.34704
Ptprs	chr17	56475369	56477369	4.5208	4.01985	0.109207	0.291532	4.27033	0.20037	4.34672
Fcho1	chr8	71724716	71726716	6.2789	1.51861	0	0.364415	3.89875	0.182207	4.34597
Prph	chr15	99054174	99056174	11.0509	6.61042	0.43683	0.413003	8.83064	0.424916	4.34534
Prph	chr15	99054174	99056174	11.0509	6.61042	0.43683	0.413003	8.83064	0.424916	4.34534
Sema7a	chr9	57939113	57941113	5.39985	3.12655	0.109207	0.291532	4.2632	0.20037	4.34432
Dlx1	chr2	71528853	71530853	6.90679	4.68983	0.163811	0.388709	5.79831	0.27626	4.34272
She	chr3	89830370	89832370	8.91603	5.13648	0.382226	0.291532	7.02625	0.336879	4.3423
Cdh11	chr8	102784111	102786111	3.3906	2.41191	0	0.267237	2.90126	0.133619	4.34133
Nkx2-1	chr12	56534096	56536096	6.90679	3.43921	0.273019	0.218649	5.173	0.245834	4.34051
Scube2	chr7	109864586	109866586	4.77196	2.00993	0	0.315826	3.39094	0.157913	4.34015
Zfp800	chr6	28260923	28262923	6.78121	4.42184	0.218415	0.315826	5.60152	0.26712	4.33981
Sfmbt2	chr2	10369511	10371511	22.9808	11.9256	0.928263	0.777418	17.4532	0.85284	4.33908
Pax2	chr19	44756386	44758386	8.03699	4.01985	0.163811	0.413003	6.02842	0.288407	4.33882
Pax2	chr19	44756394	44758394	8.03699	4.01985	0.163811	0.413003	6.02842	0.288407	4.33882
Sfmbt2	chr2	10369510	10371510	22.9808	11.8809	0.928263	0.777418	17.4308	0.85284	4.33723
S1pr5	chr9	21247443	21249443	7.03236	4.15385	0	0.534475	5.59311	0.267237	4.33703
Nfatc1	chr18	80712071	80714071	12.3066	6.47643	0.546037	0.364415	9.39153	0.455226	4.33689
Nfatc1	chr18	80712071	80714071	12.3066	6.47643	0.546037	0.364415	9.39153	0.455226	4.33689
Nppc	chr1	86669573	86671573	8.28814	2.27792	0.163811	0.34012	5.28303	0.251966	4.33664
Arpp21	chr9	112234018	112236018	7.15794	2.05459	0.218415	0.218649	4.60627	0.218532	4.33626
Arpp21	chr9	112234018	112236018	7.15794	2.05459	0.218415	0.218649	4.60627	0.218532	4.33626
Tnfaip2	chr12	111449519	111451519	3.76734	1.51861	0	0.242943	2.64297	0.121472	4.33479
Efna3	chr3	89320631	89322631	10.6741	6.11911	0.327622	0.485886	8.39662	0.406754	4.33426
Zfp579	chr7	4995101	4997101	9.54392	6.3871	0.163811	0.607358	7.96551	0.385584	4.33352
Insrr	chr3	87796094	87798094	12.0555	4.6005	0.491433	0.315826	8.32799	0.40363	4.33329
Hivep3	chr4	119732784	119734784	4.01849	0.8933	0.0546037	0.17006	2.4559	0.112332	4.33324
Hivep3	chr4	119732784	119734784	4.01849	0.8933	0.0546037	0.17006	2.4559	0.112332	4.33324
Egr2	chr10	67537683	67539683	9.92066	8.08437	0.218415	0.655946	9.00251	0.437181	4.333
Insrr	chr3	87795965	87797965	11.302	4.33251	0.491433	0.267237	7.81726	0.379335	4.32942
Bmi1	chr2	18679372	18681372	15.3205	7.99504	0.218415	0.923184	11.6578	0.570799	4.32835
Bmi1	chr2	18679374	18681374	15.3205	7.99504	0.218415	0.923184	11.6578	0.570799	4.32835
Cacna2d1	chr5	15933829	15935829	2.88829	1.51861	0.0546037	0.145766	2.20345	0.100185	4.3283
Gm266	chr12	111484823	111486823	6.40447	2.63524	0.163811	0.267237	4.51986	0.215524	4.32811
Pax6	chr2	105667935	105669935	5.39985	4.73449	0.218415	0.267237	5.06717	0.242826	4.32781
Zfp516	chr18	82909879	82911879	3.89292	1.60794	0.109207	0.145766	2.75043	0.127487	4.32753
Grin2c	chr11	115266243	115268243	7.91141	2.8139	0.273019	0.242943	5.36265	0.257981	4.32543
Cd70	chr17	57148777	57150777	8.5393	2.18859	0.0546037	0.461592	5.36394	0.258098	4.32515
Neurod2	chr11	98328648	98330648	23.7342	9.9603	0.982867	0.680241	16.8473	0.831554	4.32417
Rin3	chr12	102282048	102284048	4.14407	4.01985	0	0.388709	4.08196	0.194354	4.32365
Tigd4	chr3	84592574	84594574	6.02774	2.00993	0.163811	0.218649	4.01883	0.19123	4.32345
Prdm14	chr1	13126163	13128163	22.604	6.56576	0.928263	0.51018	14.5849	0.719222	4.32296
Irx6	chr8	92673289	92675289	2.63714	2.72457	0.0546037	0.194354	2.68085	0.124479	4.32261
Tbc1d30	chr10	121310189	121312189	6.90679	3.79653	0.273019	0.242943	5.35166	0.257981	4.32248
Spata18	chr5	73650380	73652380	4.14407	3.88586	0.163811	0.218649	4.01496	0.19123	4.32206
Spata18	chr5	73650380	73652380	4.14407	3.88586	0.163811	0.218649	4.01496	0.19123	4.32206
Spata18	chr5	73650380	73652380	4.14407	3.88586	0.163811	0.218649	4.01496	0.19123	4.32206
Rgs10	chr7	128417758	128419758	8.28814	3.26055	0	0.558769	5.77434	0.279385	4.32109
Pdgfa	chr5	138993281	138995281	2.38598	1.0273	0.0546037	0.0971772	1.70664	0.0758905	4.32094
Epha6	chr16	60604248	60606248	4.77196	0.580645	0.0546037	0.194354	2.6763	0.124479	4.32017
Grb10	chr11	12037683	12039683	6.15332	2.59057	0.273019	0.145766	4.37194	0.209392	4.31999
Flt3	chr5	147399489	147401489	16.8274	5.3598	0.873659	0.218649	11.0936	0.546154	4.3194
Flt3	chr5	147399489	147401489	16.8274	5.3598	0.873659	0.218649	11.0936	0.546154	4.3194
Flt3	chr5	147399489	147401489	16.8274	5.3598	0.873659	0.218649	11.0936	0.546154	4.3194
Emilin2	chr17	71309965	71311965	5.14869	3.34988	0.163811	0.242943	4.24929	0.203377	4.31913
Fgfr2	chr7	130262975	130264975	8.5393	2.50124	0.218415	0.315826	5.52027	0.26712	4.31877
Insrr	chr3	87795951	87797951	11.302	4.19851	0.491433	0.267237	7.75026	0.379335	4.31702
Rapgef3	chr15	97766046	97768046	4.14407	2.76923	0.109207	0.218649	3.45665	0.163928	4.31698
Rapgef3	chr15	97766062	97768062	4.14407	2.76923	0.109207	0.218649	3.45665	0.163928	4.31698
Vcan	chr13	89741509	89743509	6.2789	3.17122	0.163811	0.291532	4.72506	0.227671	4.31634
Tbr1	chr2	61803453	61805453	9.41834	6.43176	0.43683	0.34012	7.92505	0.388475	4.31568
Gja3	chr14	57057030	57059030	19.9669	5.67246	0.709848	0.558769	12.8197	0.634309	4.31559
Nfic	chr10	81426173	81428173	6.78121	2.90323	0.273019	0.194354	4.84222	0.233686	4.31555
Nfic	chr10	81426187	81428187	6.78121	2.90323	0.273019	0.194354	4.84222	0.233686	4.31555
Rgma	chr7	73374520	73376520	4.89754	3.21588	0.218415	0.17006	4.05671	0.194237	4.31554
Rgma	chr7	73374520	73376520	4.89754	3.21588	0.218415	0.17006	4.05671	0.194237	4.31554
Gnas	chr2	174326730	174328730	15.6972	6.92308	0.43683	0.680241	11.3102	0.558535	4.3155
Tgtp2	chr11	49063204	49065204	1.25578	0.08933	0	0.0485886	0.672555	0.0242943	4.3149
Hoxa1	chr6	52157317	52159317	14.1903	5.3598	0.600641	0.364415	9.77505	0.482528	4.3123
Hoxa1	chr6	52157317	52159317	14.1903	5.3598	0.600641	0.364415	9.77505	0.482528	4.3123
Shox2	chr3	66977811	66979811	15.9484	13.1315	0.546037	0.898889	14.54	0.722463	4.31211
Lhx1	chr11	84525015	84527015	13.688	5.4938	0.43683	0.51018	9.5909	0.473505	4.31157
Tradd	chr8	105259120	105261120	9.04161	6.16377	0.163811	0.583063	7.60269	0.373437	4.31134
Gm10006	chr12	82617025	82619025	7.28352	4.42184	0.109207	0.461592	5.85268	0.2854	4.31082
Phf19	chr2	34911871	34913871	13.3113	3.43921	0.655245	0.17006	8.37523	0.412652	4.31031
Gm5861	chr5	11039115	11041115	0.376734	0	0	0	0.188367	0	4.3101
Gria2	chr3	80801791	80803791	8.03699	4.01985	0.273019	0.315826	6.02842	0.294422	4.31003
Gria2	chr3	80801791	80803791	8.03699	4.01985	0.273019	0.315826	6.02842	0.294422	4.31003
Fgf9	chr14	58069547	58071547	7.03236	2.00993	0.218415	0.218649	4.52114	0.218532	4.30941
2003-09-01	chr15	82273935	82275935	8.91603	4.82382	0.163811	0.51018	6.86993	0.336996	4.3094
Osbp2	chr11	3862903	3864903	8.03699	4.24318	0.382226	0.218649	6.14008	0.300437	4.30823
Osbp2	chr11	3862903	3864903	8.03699	4.24318	0.382226	0.218649	6.14008	0.300437	4.30823
Psmb8	chr17	34197609	34199609	6.65563	5.62779	0.163811	0.437298	6.14171	0.300554	4.30807
Podxl2	chr6	88873796	88875796	7.03236	3.08189	0.273019	0.218649	5.05712	0.245834	4.30789
Med13l	chr5	118559719	118561719	2.63714	0.62531	0	0.145766	1.63122	0.0728829	4.30755
Crmp1	chr5	37241080	37243080	8.66488	3.84119	0.273019	0.34012	6.25303	0.306569	4.30627
Nrip3	chr7	109780545	109782545	7.91141	3.39454	0.163811	0.388709	5.65298	0.27626	4.30616
Foxa2	chr2	148037270	148039270	11.302	8.0397	0.327622	0.631652	9.67086	0.479637	4.30535
Chrna3	chr9	55025559	55027559	5.39985	3.97519	0.163811	0.291532	4.68752	0.227671	4.30486
Rap1gap2	chr11	74589158	74591158	10.2974	6.02978	0.491433	0.315826	8.16358	0.40363	4.30456
Rasgef1c	chr11	49900835	49902835	7.03236	3.17122	0.327622	0.17006	5.10179	0.248841	4.30369
Gm581	chr7	45178597	45180597	16.5763	10.0496	0.163811	1.16613	13.313	0.664969	4.30295
Htra4	chr8	25036330	25038330	12.1811	5.80645	0.382226	0.51018	8.99376	0.446203	4.30278
Podxl2	chr6	88873738	88875738	7.03236	3.03722	0.273019	0.218649	5.03479	0.245834	4.30152
Sorcs1	chr19	50677646	50679646	2.13482	2.54591	0	0.218649	2.34037	0.109324	4.29992
Sorcs1	chr19	50677646	50679646	2.13482	2.54591	0	0.218649	2.34037	0.109324	4.29992
Ccdc106	chr7	5055152	5057152	23.6086	10.005	0.764452	0.923184	16.8068	0.843818	4.29983
Coro6	chr11	77461411	77463411	12.8089	5.4938	0.546037	0.364415	9.15137	0.455226	4.29956
Coro6	chr11	77461411	77463411	12.8089	5.4938	0.546037	0.364415	9.15137	0.455226	4.29956
Dach1	chr14	98168765	98170765	2.88829	1.42928	0.0546037	0.145766	2.15879	0.100185	4.29889
Lingo3	chr10	80843039	80845039	7.78583	3.5732	0	0.558769	5.67952	0.279385	4.29725
Fam65b	chr13	24637684	24639684	9.16719	4.33251	0.327622	0.34012	6.74985	0.333871	4.29705
3222401L13Rik	chr18	37735936	37737936	12.4322	10.005	0.491433	0.631652	11.2186	0.561543	4.29617
Emx2	chr19	59457690	59459690	5.65101	3.66253	0.163811	0.291532	4.65677	0.227671	4.29538
Nfia	chr4	97756389	97758389	8.28814	4.6005	0.273019	0.364415	6.44432	0.318717	4.29535
Epha6	chr16	60604219	60606219	5.02312	0.71464	0.0546037	0.218649	2.86888	0.136626	4.29529
Tbx2	chr11	85831551	85833551	4.39523	2.41191	0.109207	0.218649	3.40357	0.163928	4.29472
Gnas	chr2	174326699	174328699	15.8228	7.41439	0.43683	0.728829	11.6186	0.582829	4.29392
Csmd3	chr15	48790933	48792933	13.688	6.92308	0.546037	0.485886	10.3055	0.515962	4.29372
Pth1r	chr9	110742686	110744686	5.39985	2.94789	0.163811	0.242943	4.17387	0.203377	4.29336
Nfkb1	chr3	135690547	135692547	3.13945	1.51861	0	0.218649	2.32903	0.109324	4.29295
Coro1a	chr7	126703220	126705220	4.77196	1.42928	0.0546037	0.242943	3.10062	0.148773	4.29216
3110079O15Rik	chr1	87509362	87511362	8.91603	3.7072	0.163811	0.461592	6.31161	0.312701	4.29202
Adamts2	chr11	50601084	50603084	3.26503	1.38462	0	0.218649	2.32482	0.109324	4.29035
Foxe1	chr4	46342609	46344609	13.9391	4.24318	0.546037	0.364415	9.09116	0.455226	4.29005
Fgf12	chr16	28444227	28446227	6.65563	3.5732	0.163811	0.34012	5.11442	0.251966	4.28994
Alox15	chr11	70351031	70353031	6.15332	2.76923	0	0.437298	4.46127	0.218649	4.28948
Wnt10b	chr15	98776261	98778261	5.65101	4.68983	0.218415	0.291532	5.17042	0.254973	4.28915
Mfhas1	chr8	35586798	35588798	5.52543	1.96526	0.218415	0.145766	3.74534	0.18209	4.28909
Pxdc1	chr13	34651671	34653671	3.89292	0.982631	0.109207	0.121472	2.43777	0.115339	4.28756
Pxdc1	chr13	34651681	34653681	3.89292	0.982631	0.109207	0.121472	2.43777	0.115339	4.28756
Pxdc1	chr13	34651681	34653681	3.89292	0.982631	0.109207	0.121472	2.43777	0.115339	4.28756
Sox1	chr8	12394295	12396295	11.5532	6.47643	0.491433	0.413003	9.0148	0.452218	4.28725
Tfap2b	chr1	19207914	19209914	14.3159	7.86104	0.43683	0.680241	11.0885	0.558535	4.28697
Fhdc1	chr3	84478491	84480491	2.76271	1.87593	0	0.218649	2.31932	0.109324	4.28695
Rasgef1c	chr11	49900855	49902855	6.90679	3.17122	0.327622	0.17006	5.039	0.248841	4.28586
Irak3	chr10	120200587	120202587	1.63251	2.05459	0	0.17006	1.84355	0.0850301	4.28576
Irak3	chr10	120200590	120202590	1.63251	2.05459	0	0.17006	1.84355	0.0850301	4.28576
Gsx2	chr5	75074464	75076464	10.0462	7.36973	0.218415	0.655946	8.70798	0.437181	4.28506
Kdelr1	chr7	45869928	45871928	9.54392	4.19851	0.273019	0.413003	6.87122	0.343011	4.28488
Myh7b	chr2	155628060	155630060	8.66488	4.24318	0.327622	0.315826	6.45403	0.321724	4.28438
Tnfaip2	chr12	111443324	111445324	13.4368	6.92308	0.491433	0.534475	10.18	0.512954	4.28432
Adcy8	chr15	64921296	64923296	2.51156	2.59057	0	0.242943	2.55106	0.121472	4.28392
Prkag2	chr5	25099983	25101983	3.51618	2.05459	0	0.267237	2.78539	0.133619	4.28273
Commd3	chr2	18673424	18675424	10.2974	5.89578	0.109207	0.704535	8.09659	0.406871	4.28142
Pax3	chr1	78195838	78197838	11.1764	5.3598	0.491433	0.34012	8.26812	0.415777	4.28113
Nr2e1	chr10	42582632	42584632	7.53467	5.22581	0.273019	0.364415	6.38024	0.318717	4.28095
Pyy	chr11	102106416	102108416	7.03236	3.84119	0.0546037	0.485886	5.43678	0.270245	4.28064
Nol4	chr18	23037656	23039656	8.28814	6.34243	0.273019	0.461592	7.31529	0.367305	4.27908
Runx3	chr4	135153436	135155436	11.302	5.09181	0.43683	0.388709	8.19691	0.412769	4.2789
Fam65b	chr13	24637713	24639713	9.6695	4.6005	0.327622	0.388709	7.135	0.358166	4.27851
Nfic	chr10	81426114	81428114	6.78121	3.12655	0.273019	0.218649	4.95388	0.245834	4.27819
Rin3	chr12	102282168	102284168	3.3906	3.5732	0	0.34012	3.4819	0.17006	4.27746
Lmx1b	chr2	33631267	33633267	10.6741	6.52109	0.600641	0.267237	8.59761	0.433939	4.27718
Slc6a3	chr13	73535747	73537747	2.51156	3.03722	0	0.267237	2.77439	0.133619	4.27705
Rbp4	chr19	38123811	38125811	6.2789	2.6799	0.0546037	0.388709	4.4794	0.221656	4.27646
Cadps2	chr6	23838263	23840263	8.03699	1.96526	0.327622	0.17006	5.00112	0.248841	4.275
Kitl	chr10	100014916	100016916	5.39985	2.72457	0.109207	0.291532	4.06221	0.20037	4.27481
Fezf1	chr6	23247264	23249264	5.52543	3.30521	0	0.437298	4.41532	0.218649	4.27458
Atp6v1c2	chr12	17323730	17325730	14.3159	7.54839	0.600641	0.51018	10.9321	0.555411	4.27445
Hhex	chr19	37431887	37433887	7.66025	5.27047	0.163811	0.485886	6.46536	0.324849	4.27338
Kcnc4	chr3	107457898	107459898	9.29277	3.75186	0.218415	0.437298	6.52231	0.327856	4.27311
Barx2	chr9	31912462	31914462	7.78583	6.07444	0.382226	0.315826	6.93014	0.349026	4.2728
Gnas	chr2	174327023	174329023	14.4415	6.56576	0.43683	0.631652	10.5036	0.534241	4.27187
Slc16a8	chr15	79260297	79262297	8.5393	2.72457	0.273019	0.291532	5.63193	0.282275	4.27079
Coch	chr12	51592341	51594341	18.46	6.74442	0.655245	0.631652	12.6022	0.643448	4.2706
Coch	chr12	51592341	51594341	18.46	6.74442	0.655245	0.631652	12.6022	0.643448	4.2706
5730596B20Rik	chr6	52182855	52184855	28.7573	15.7668	1.36509	0.923184	22.262	1.14414	4.27035
Sgcz	chr8	38660508	38662508	3.51618	0.71464	0.0546037	0.145766	2.11541	0.100185	4.26975
Sgcz	chr8	38660508	38662508	3.51618	0.71464	0.0546037	0.145766	2.11541	0.100185	4.26975
Trpm2	chr10	77968804	77970804	6.78121	2.36725	0.163811	0.291532	4.57423	0.227671	4.26964
Epha5	chr5	84416359	84418359	4.5208	1.33995	0.163811	0.121472	2.93038	0.142641	4.26778
Rarb	chr14	16574472	16576472	5.77658	2.18859	0.0546037	0.34012	3.98259	0.197362	4.2671
Slc13a5	chr11	72266222	72268222	4.77196	2.72457	0.0546037	0.315826	3.74826	0.185215	4.26693
Cbln2	chr18	86712048	86714048	5.65101	2.41191	0.327622	0.0728829	4.03146	0.200253	4.26468
Hnf1b	chr11	83851242	83853242	6.02774	4.01985	0.163811	0.34012	5.0238	0.251966	4.2642
Isl1	chr13	116305397	116307397	11.4276	5.85112	0.273019	0.607358	8.63935	0.440188	4.26399
Otud1	chr2	19908780	19910780	1.00462	0.759305	0	0.0728829	0.881964	0.0364415	4.2635
Zfpm2	chr15	40654042	40656042	4.26965	3.43921	0.163811	0.218649	3.85443	0.19123	4.26334
Tnfaip2	chr12	111445084	111447084	14.3159	6.78908	0.546037	0.534475	10.5525	0.540256	4.2627
Tacr1	chr6	82401475	82403475	6.15332	2.94789	0.163811	0.291532	4.5506	0.227671	4.26218
Gata4	chr14	63270692	63272692	10.6741	3.88586	0.546037	0.194354	7.27999	0.370196	4.2611
2810459M11Rik	chr1	86044863	86046863	8.16256	5.94045	0.109207	0.607358	7.05151	0.358283	4.26109
Slc6a20a	chr9	123677439	123679439	16.953	7.36973	0.546037	0.704535	12.1614	0.625286	4.25994
Gfra1	chr19	58454006	58456006	10.7997	4.77916	0.382226	0.413003	7.78943	0.397615	4.25809
Csmd3	chr15	48791063	48793063	13.3113	6.78908	0.546037	0.485886	10.0502	0.515962	4.25755
Zeb2	chr2	45111890	45113890	12.4322	6.3871	0.600641	0.364415	9.40966	0.482528	4.2574
Scube2	chr7	109864643	109866643	4.5208	1.87593	0	0.315826	3.19837	0.157913	4.25605
Scube2	chr7	109864679	109866679	4.5208	1.87593	0	0.315826	3.19837	0.157913	4.25605
Nacc2	chr2	26122220	26124220	6.65563	1.47395	0.163811	0.242943	4.06479	0.203377	4.25525
Col2a1	chr15	97998693	98000693	8.5393	5.85112	0.273019	0.461592	7.19521	0.367305	4.25524
Arsi	chr18	60910780	60912780	2.13482	1.47395	0	0.17006	1.80439	0.0850301	4.25495
Gm9837	chr11	53464496	53466496	9.6695	3.88586	0.327622	0.364415	6.77768	0.346018	4.25289
Wnt2b	chr3	104960709	104962709	13.0601	5.22581	0.600641	0.34012	9.14296	0.470381	4.25199
1810041L15Rik	chr15	84446097	84448097	4.77196	2.41191	0.163811	0.194354	3.59194	0.179083	4.25168
Sncaip	chr18	52766709	52768709	2.88829	2.09926	0	0.242943	2.49377	0.121472	4.25128
Sncaip	chr18	52766710	52768710	2.88829	2.09926	0	0.242943	2.49377	0.121472	4.25128
Sncaip	chr18	52766994	52768994	2.88829	2.09926	0	0.242943	2.49377	0.121472	4.25128
Gm53	chr11	96251532	96253532	17.4553	7.50372	0.928263	0.364415	12.4795	0.646339	4.25013
Fam81a	chr9	70140578	70142578	4.77196	2.05459	0.218415	0.121472	3.41328	0.169943	4.24976
Csmd3	chr15	48790989	48792989	13.3113	6.65509	0.546037	0.485886	9.98317	0.515962	4.24791
Csmd3	chr15	48790989	48792989	13.3113	6.65509	0.546037	0.485886	9.98317	0.515962	4.24791
Csmd3	chr15	48790989	48792989	13.3113	6.65509	0.546037	0.485886	9.98317	0.515962	4.24791
Cldn26	chr16	8424136	8426136	5.52543	2.6799	0	0.413003	4.10266	0.206502	4.24762
Rapgef3	chr15	97766264	97768264	4.14407	2.90323	0.109207	0.242943	3.52365	0.176075	4.2472
Alx1	chr10	103029344	103031344	17.2042	6.87841	0.764452	0.485886	12.0413	0.625169	4.2459
Tgfbr3	chr5	107288629	107290629	7.4091	1.47395	0.109207	0.34012	4.44152	0.224664	4.24563
Gipc3	chr10	81342266	81344266	11.8043	5.3598	0.546037	0.34012	8.58206	0.443079	4.24517
Col26a1	chr5	136882184	136884184	17.5809	8.44169	1.03747	0.315826	13.0113	0.676648	4.24516
Ptprs	chr17	56475483	56477483	3.89292	4.06452	0.109207	0.291532	3.97872	0.20037	4.24493
Slc24a2	chr4	87229477	87231477	4.64638	1.9206	0.109207	0.218649	3.28349	0.163928	4.24305
Podxl2	chr6	88873597	88875597	8.28814	3.21588	0.273019	0.315826	5.75201	0.294422	4.24243
Bicc1	chr10	71158700	71160700	5.27427	2.54591	0.273019	0.121472	3.91009	0.197245	4.24148
Zeb2	chr2	45112001	45114001	12.1811	6.87841	0.600641	0.388709	9.52974	0.494675	4.24052
Gm13271	chr4	88754590	88756590	13.0601	5.53846	0.382226	0.583063	9.29928	0.482645	4.24005
Wnt10a	chr1	74790516	74792516	10.7997	6.87841	0.382226	0.534475	8.83906	0.45835	4.23986
Pcdhb2	chr18	37293840	37295840	6.78121	3.21588	0	0.51018	4.99854	0.25509	4.23984
Col26a1	chr5	136882121	136884121	17.0786	7.81638	0.982867	0.315826	12.4475	0.649346	4.23983
Kcnk4	chr19	6933515	6935515	12.8089	6.69975	0.382226	0.631652	9.75435	0.506939	4.23946
Cadps2	chr6	23838262	23840262	8.16256	2.05459	0.327622	0.194354	5.10858	0.260988	4.23944
Arfgap3	chr15	83366277	83368277	5.14869	4.15385	0.109207	0.364415	4.65127	0.236811	4.23924
Tfap2b	chr1	19211054	19213054	12.8089	7.72705	0.43683	0.631652	10.268	0.534241	4.23917
Col26a1	chr5	136881910	136883910	14.9438	7.41439	0.873659	0.291532	11.1791	0.582596	4.2389
Asic1	chr15	99669718	99671718	16.1996	3.97519	0.491433	0.558769	10.0874	0.525101	4.23802
Ccdc106	chr7	5055740	5057740	15.4461	7.23573	0.600641	0.583063	11.3409	0.591852	4.23726
Vax1	chr19	59169028	59171028	14.3159	7.32506	0.546037	0.583063	10.8205	0.56455	4.23652
Klhl40	chr9	121776607	121778607	10.0462	3.34988	0.327622	0.364415	6.69806	0.346018	4.23587
Slc6a17	chr3	107516327	107518327	5.90216	2.23325	0	0.413003	4.06771	0.206502	4.23531
Slc6a17	chr3	107516337	107518337	5.90216	2.23325	0	0.413003	4.06771	0.206502	4.23531
Atp11a	chr8	12756069	12758069	3.89292	2.41191	0	0.315826	3.15241	0.157913	4.23524
Nr4a2	chr2	57113373	57115373	8.79045	4.01985	0.491433	0.17006	6.40515	0.330747	4.23471
Ccdc106	chr7	5055725	5057725	15.4461	7.19107	0.600641	0.583063	11.3186	0.591852	4.23441
Bicc1	chr10	71158690	71160690	5.27427	2.50124	0.273019	0.121472	3.88776	0.197245	4.23323
Gnas	chr2	174326570	174328570	16.4507	7.63772	0.43683	0.826006	12.0442	0.631418	4.23213
Msx1	chr5	37823583	37825583	2.88829	3.39454	0	0.315826	3.14142	0.157913	4.23021
Als2cr11	chr1	59093900	59095900	3.51618	0.937966	0	0.218649	2.22707	0.109324	4.22865
Cpm	chr10	117628500	117630500	11.1764	5.22581	0.273019	0.583063	8.20112	0.428041	4.22844
Cpm	chr10	117628500	117630500	11.1764	5.22581	0.273019	0.583063	8.20112	0.428041	4.22844
Cpm	chr10	117628500	117630500	11.1764	5.22581	0.273019	0.583063	8.20112	0.428041	4.22844
Abhd15	chr11	77514731	77516731	4.01849	2.59057	0.163811	0.17006	3.30453	0.166936	4.22751
Apba2	chr7	64501138	64503138	5.65101	2.32258	0.163811	0.242943	3.98679	0.203377	4.22737
Pstpip2	chr18	77793545	77795545	6.2789	3.61787	0.218415	0.291532	4.94838	0.254973	4.22595
Zwint	chr10	73098342	73100342	2.63714	3.17122	0	0.291532	2.90418	0.145766	4.22564
Fzd10	chr5	128600106	128602106	2.00925	1.07196	0	0.145766	1.5406	0.0728829	4.22561
Fbll1	chr11	35797884	35799884	7.28352	4.42184	0.218415	0.388709	5.85268	0.303562	4.22474
Jph3	chr8	121728623	121730623	12.4322	5.62779	0.218415	0.728829	9.03	0.473622	4.22437
H2-Q7	chr17	35438155	35440155	2.38598	0.80397	0.0546037	0.0971772	1.59498	0.0758905	4.22391
H2-Q7	chr17	35438155	35440155	2.38598	0.80397	0.0546037	0.0971772	1.59498	0.0758905	4.22391
H2-Q7	chr17	35438155	35440155	2.38598	0.80397	0.0546037	0.0971772	1.59498	0.0758905	4.22391
H2-Q7	chr17	35438155	35440155	2.38598	0.80397	0.0546037	0.0971772	1.59498	0.0758905	4.22391
Wrap73	chr4	154141372	154143372	10.6741	7.23573	0.382226	0.558769	8.95493	0.470497	4.22169
Zc3hav1	chr6	38353273	38355273	9.04161	4.33251	0.382226	0.315826	6.68706	0.349026	4.22137
Zc3hav1	chr6	38353273	38355273	9.04161	4.33251	0.382226	0.315826	6.68706	0.349026	4.22137
Alx3	chr3	107594031	107596031	7.03236	3.39454	0.273019	0.267237	5.21345	0.270128	4.22085
Klrg2	chr6	38636239	38638239	8.28814	4.51117	0.327622	0.34012	6.39965	0.333871	4.22031
Fev	chr1	74883608	74885608	11.6787	7.90571	0.546037	0.485886	9.79223	0.515962	4.22008
Cbx4	chr11	119085221	119087221	7.4091	1.42928	0.163811	0.291532	4.41919	0.227671	4.22
Cbx4	chr11	119085221	119087221	7.4091	1.42928	0.163811	0.291532	4.41919	0.227671	4.22
Amn	chr12	111270111	111272111	10.2974	4.64516	0.491433	0.291532	7.47128	0.391483	4.21988
Lphn3	chr5	81019752	81021752	8.41372	4.37717	0.327622	0.34012	6.39545	0.333871	4.21936
Lphn3	chr5	81019755	81021755	8.41372	4.37717	0.327622	0.34012	6.39545	0.333871	4.21936
Hoxb6	chr11	96291476	96293476	16.953	7.81638	0.873659	0.437298	12.3847	0.655478	4.21919
Lypd4	chr7	24868732	24870732	5.90216	4.28784	0.163811	0.364415	5.095	0.264113	4.21907
Col26a1	chr5	136881930	136883930	14.9438	7.54839	0.873659	0.315826	11.2461	0.594743	4.21824
Irak3	chr10	120200658	120202658	1.50693	2.00993	0	0.17006	1.75843	0.0850301	4.21794
Irak3	chr10	120200659	120202659	1.50693	2.00993	0	0.17006	1.75843	0.0850301	4.21794
Tpm1	chr9	67048143	67050143	9.6695	2.99256	0.273019	0.388709	6.33103	0.330864	4.21745
Col26a1	chr5	136881743	136883743	14.3159	7.1464	0.819056	0.315826	10.7311	0.567441	4.21733
Crhr1	chr11	104131855	104133855	4.64638	2.14392	0.0546037	0.291532	3.39515	0.173068	4.21727
Cltb	chr13	54610292	54612292	3.3906	1.0273	0	0.218649	2.20895	0.109324	4.21692
Cltb	chr13	54610292	54612292	3.3906	1.0273	0	0.218649	2.20895	0.109324	4.21692
Apaf1	chr10	90828843	90830843	10.0462	5.09181	0.382226	0.413003	7.56902	0.397615	4.21673
Apaf1	chr10	90828843	90830843	10.0462	5.09181	0.382226	0.413003	7.56902	0.397615	4.21673
Apaf1	chr10	90828843	90830843	10.0462	5.09181	0.382226	0.413003	7.56902	0.397615	4.21673
Apaf1	chr10	90828843	90830843	10.0462	5.09181	0.382226	0.413003	7.56902	0.397615	4.21673
Prss56	chr1	87185665	87187665	2.38598	2.59057	0.0546037	0.194354	2.48828	0.124479	4.21548
Opcml	chr9	27789775	27791775	4.5208	2.14392	0	0.34012	3.33236	0.17006	4.21432
Pax6	chr2	105667920	105669920	5.52543	4.73449	0.218415	0.315826	5.12996	0.26712	4.21317
Arfgap3	chr15	83366282	83368282	5.02312	4.10918	0.109207	0.364415	4.56615	0.236811	4.21266
Sptbn2	chr19	4710208	4712208	5.65101	3.93052	0.109207	0.388709	4.79076	0.248958	4.21247
Gas7	chr11	67454437	67456437	5.90216	2.09926	0	0.413003	4.00071	0.206502	4.21141
Tifa	chr3	127790381	127792381	12.9345	4.95782	0.43683	0.51018	8.94617	0.473505	4.21128
Nr2f1	chr13	78189443	78191443	18.7111	9.9603	0.873659	0.655946	14.3357	0.764803	4.21065
Kctd8	chr5	69340562	69342562	3.01387	1.38462	0	0.218649	2.19924	0.109324	4.21059
Lep	chr6	28980634	28982634	6.78121	4.24318	0.382226	0.194354	5.51219	0.28829	4.21045
Pax6	chr2	105667896	105669896	5.52543	4.68983	0.218415	0.315826	5.10763	0.26712	4.20689
Pax6	chr2	105667896	105669896	5.52543	4.68983	0.218415	0.315826	5.10763	0.26712	4.20689
Gldn	chr9	54285486	54287486	5.65101	1.87593	0	0.388709	3.76347	0.194354	4.20675
Col12a1	chr9	79717494	79719494	6.2789	3.7072	0.327622	0.194354	4.99305	0.260988	4.2065
Tmem132c	chr5	127240808	127242808	3.76734	4.19851	0.218415	0.194354	3.98292	0.206385	4.20578
H2afy	chr13	56133825	56135825	4.5208	2.09926	0.218415	0.121472	3.31003	0.169943	4.20558
Tap1	chr17	34186353	34188353	7.91141	4.42184	0.163811	0.485886	6.16662	0.324849	4.20524
Foxd2	chr4	114908257	114910257	4.14407	3.48387	0.0546037	0.34012	3.81397	0.197362	4.20485
Foxd2	chr4	114908257	114910257	4.14407	3.48387	0.0546037	0.34012	3.81397	0.197362	4.20485
Plagl1	chr10	13090013	13092013	7.66025	3.66253	0.109207	0.485886	5.66139	0.297547	4.20483
Ucn	chr5	31137829	31139829	2.63714	2.41191	0.109207	0.145766	2.52452	0.127487	4.20435
Snx25	chr8	46151159	46153159	3.26503	2.00993	0	0.267237	2.63748	0.133619	4.2043
Pappa	chr4	65123174	65125174	6.53005	2.32258	0.218415	0.242943	4.42632	0.230679	4.20418
Kazald1	chr19	45075139	45077139	7.78583	4.86849	0.109207	0.558769	6.32716	0.333988	4.20341
Gm10564	chr4	155042154	155044154	4.01849	1.25062	0	0.267237	2.63456	0.133619	4.20271
Pcdha1	chr18	37142969	37144969	7.66025	3.75186	0.382226	0.218649	5.70606	0.300437	4.20265
E2f6	chr12	16809965	16811965	7.28352	3.5732	0.109207	0.461592	5.42836	0.2854	4.20243
Adam33	chr2	131053516	131055516	7.66025	4.42184	0.273019	0.364415	6.04105	0.318717	4.20227
Npr1	chr3	90464866	90466866	7.66025	3.08189	0.0546037	0.51018	5.37107	0.282392	4.20192
Nab2	chr10	127665632	127667632	9.6695	5.76179	0.163811	0.655946	7.71564	0.409879	4.20161
Pcdhb21	chr18	37512652	37514652	8.41372	3.66253	0.273019	0.364415	6.03813	0.318717	4.20157
Shox2	chr3	66977432	66979432	14.4415	12.5955	0.600641	0.850301	13.5185	0.725471	4.20119
Cdkn2a	chr4	89271587	89273587	11.5532	8.88834	0.43683	0.655946	10.2208	0.546388	4.20068
Col12a1	chr9	79717518	79719518	6.2789	3.66253	0.327622	0.194354	4.97071	0.260988	4.20005
Adamtsl5	chr10	80347412	80349412	11.0509	7.59305	0.43683	0.558769	9.32196	0.497799	4.19985
Adamtsl5	chr10	80347412	80349412	11.0509	7.59305	0.43683	0.558769	9.32196	0.497799	4.19985
Adamtsl5	chr10	80347412	80349412	11.0509	7.59305	0.43683	0.558769	9.32196	0.497799	4.19985
Adamtsl5	chr10	80347412	80349412	11.0509	7.59305	0.43683	0.558769	9.32196	0.497799	4.19985
Ccdc106	chr7	5055856	5057856	14.4415	6.20844	0.546037	0.558769	10.3249	0.552403	4.19978
Bend4	chr5	67426799	67428799	1.50693	0.62531	0	0.0971772	1.06612	0.0485886	4.19908
Cadm2	chr16	67619493	67621493	1.50693	0.17866	0	0.0728829	0.842798	0.0364415	4.19872
Megf6	chr4	154169730	154171730	4.64638	1.83127	0.163811	0.17006	3.23882	0.166936	4.19862
Cpeb1	chr7	81454392	81456392	7.15794	3.66253	0.327622	0.242943	5.41024	0.285283	4.19819
N28178	chr4	42916251	42918251	6.15332	1.42928	0.273019	0.121472	3.7913	0.197245	4.19708
Prkar1b	chr5	139129383	139131383	5.77658	1.9206	0.109207	0.291532	3.84859	0.20037	4.19708
Prkar1b	chr5	139129386	139131386	5.77658	1.9206	0.109207	0.291532	3.84859	0.20037	4.19708
Slc30a4	chr2	122701047	122703047	2.63714	1.38462	0.0546037	0.145766	2.01088	0.100185	4.19698
Col2a1	chr15	98000887	98002887	7.91141	7.68238	0.491433	0.34012	7.7969	0.415777	4.19658
Atp11a	chr8	12756014	12758014	3.76734	2.36725	0	0.315826	3.06729	0.157913	4.19588
Atp11a	chr8	12756016	12758016	3.76734	2.36725	0	0.315826	3.06729	0.157913	4.19588
Pnmt	chr11	98385450	98387450	5.65101	2.36725	0.0546037	0.364415	4.00913	0.209509	4.19453
Ccdc106	chr7	5055916	5057916	14.4415	6.11911	0.546037	0.558769	10.2803	0.552403	4.19353
Shank1	chr7	44335016	44337016	10.0462	5.85112	0.218415	0.631652	7.94868	0.425033	4.19333
Shank1	chr7	44335017	44337017	10.0462	5.85112	0.218415	0.631652	7.94868	0.425033	4.19333
Cxcl14	chr13	56295551	56297551	7.91141	4.86849	0.218415	0.461592	6.38995	0.340003	4.19262
Fam155a	chr8	9770018	9772018	4.26965	3.39454	0.109207	0.291532	3.8321	0.20037	4.1909
Tap1	chr17	34186338	34188338	7.78583	4.42184	0.163811	0.485886	6.10383	0.324849	4.1905
Engase	chr11	118568910	118570910	5.39985	2.59057	0.0546037	0.364415	3.99521	0.209509	4.18953
Pde3b	chr7	114414281	114416281	2.51156	0.491315	0	0.145766	1.50144	0.0728829	4.1887
Bdh1	chr16	31427748	31429748	5.52543	2.90323	0.0546037	0.388709	4.21433	0.221656	4.18866
Bdh1	chr16	31427752	31429752	5.52543	2.90323	0.0546037	0.388709	4.21433	0.221656	4.18866
Zic4	chr9	91381410	91383410	9.92066	5.80645	0.600641	0.242943	7.86355	0.421792	4.18861
N28178	chr4	42916270	42918270	6.15332	1.38462	0.273019	0.121472	3.76897	0.197245	4.18858
N28178	chr4	42916334	42918334	6.15332	1.38462	0.273019	0.121472	3.76897	0.197245	4.18858
Commd3	chr2	18673347	18675347	10.1718	5.89578	0.109207	0.753123	8.0338	0.431165	4.18848
Gm10419	chr5	108368858	108370858	11.4276	7.95037	0.43683	0.607358	9.68898	0.522094	4.18808
Zfp777	chr6	48047911	48049911	1.75809	0.35732	0	0.0971772	1.05771	0.0485886	4.18775
Gata5	chr2	180333699	180335699	5.39985	3.79653	0	0.485886	4.59819	0.242943	4.18732
Lhx5	chr5	120430770	120432770	8.28814	4.10918	0.273019	0.388709	6.19866	0.330864	4.18702
Rapgef3	chr15	97766420	97768420	4.5208	2.6799	0.109207	0.267237	3.60035	0.188222	4.18695
T	chr17	8524450	8526450	5.02312	3.39454	0.0546037	0.388709	4.20883	0.221656	4.18678
Uncx	chr5	139542898	139544898	6.02774	4.15385	0.273019	0.267237	5.09079	0.270128	4.18656
Uncx	chr5	139542898	139544898	6.02774	4.15385	0.273019	0.267237	5.09079	0.270128	4.18656
Nkx2-9	chr12	56612284	56614284	11.302	5.18114	0.109207	0.777418	8.24158	0.443313	4.18609
Bmp7	chr2	172939321	172941321	4.39523	1.47395	0.109207	0.194354	2.93459	0.151781	4.18595
Adamts8	chr9	30941562	30943562	9.79508	4.68983	0.43683	0.34012	7.24245	0.388475	4.18591
Col26a1	chr5	136882209	136884209	16.7019	8.26303	1.03747	0.315826	12.4824	0.676648	4.18534
Gm10775	chr13	65258539	65260539	6.02774	3.26055	0.273019	0.218649	4.64414	0.245834	4.18524
Gm9837	chr11	53469479	53471479	8.03699	3.5732	0.109207	0.51018	5.80509	0.309694	4.18504
Ankrd33b	chr15	31366568	31368568	7.28352	5.53846	0.273019	0.413003	6.41099	0.343011	4.18501
Nab2	chr10	127665710	127667710	9.6695	5.58313	0.163811	0.655946	7.62631	0.409879	4.18483
Commd3	chr2	18673649	18675649	9.79508	5.89578	0.163811	0.680241	7.84543	0.422026	4.1845
Tpm1	chr9	67048118	67050118	9.41834	2.94789	0.273019	0.388709	6.18312	0.330864	4.1834
Rin3	chr12	102282167	102284167	3.3906	3.5732	0	0.364415	3.4819	0.182207	4.18328
H2afy	chr13	56134440	56136440	4.89754	3.7072	0.163811	0.291532	4.30237	0.227671	4.18144
Irak3	chr10	120200612	120202612	1.50693	1.9206	0	0.17006	1.71377	0.0850301	4.18104
Apba2	chr7	64500949	64502949	5.52543	2.18859	0.163811	0.242943	3.85701	0.203377	4.17974
Csf1	chr3	107759242	107761242	3.26503	1.47395	0	0.242943	2.36949	0.121472	4.17783
Csf1	chr3	107759242	107761242	3.26503	1.47395	0	0.242943	2.36949	0.121472	4.17783
Kcns3	chr12	11149842	11151842	8.03699	2.18859	0.327622	0.218649	5.11279	0.273136	4.17736
Fli1	chr9	32540389	32542389	9.29277	1.9206	0.382226	0.218649	5.60668	0.300437	4.17734
Tbx21	chr11	97114331	97116331	6.65563	2.6799	0.327622	0.17006	4.66777	0.248841	4.17568
Lphn3	chr5	81019571	81021571	8.03699	3.93052	0.327622	0.315826	5.98375	0.321724	4.1754
Asxl3	chr18	22343883	22345883	9.92066	2.59057	0.382226	0.291532	6.25561	0.336879	4.17495
Ankrd33b	chr15	31366532	31368532	7.28352	5.44913	0.273019	0.413003	6.36633	0.343011	4.17494
Pax1	chr2	147360925	147362925	7.15794	5.22581	0.327622	0.34012	6.19187	0.333871	4.17276
Syt12	chr19	4476447	4478447	5.65101	3.88586	0.218415	0.291532	4.76843	0.254973	4.17262
Foxd4	chr19	24900309	24902309	15.4461	8.84367	0.819056	0.51018	12.1449	0.664618	4.17132
Bsx	chr9	40873127	40875127	13.688	6.43176	0.709848	0.388709	10.0599	0.549279	4.17034
Cacna2d2	chr9	107398880	107400880	6.02774	1.74194	0.218415	0.194354	3.88484	0.206385	4.16989
Cacna2d2	chr9	107398880	107400880	6.02774	1.74194	0.218415	0.194354	3.88484	0.206385	4.16989
Leprel1	chr16	26104784	26106784	9.6695	3.12655	0.327622	0.364415	6.39803	0.346018	4.16986
Sim1	chr10	50894651	50896651	20.218	9.29033	0.819056	0.801712	14.7542	0.810384	4.16966
Adcy5	chr16	35153877	35155877	3.76734	3.12655	0	0.364415	3.44694	0.182207	4.16876
Atp6v1c2	chr12	17323665	17325665	14.9438	7.77171	0.709848	0.534475	11.3577	0.622161	4.16851
Abca17	chr17	24350029	24352029	6.40447	3.75186	0.109207	0.437298	5.07817	0.273252	4.16699
Dtx1	chr5	120710927	120712927	10.423	4.95782	0.546037	0.291532	7.69039	0.418784	4.16661
Igf2	chr7	142658693	142660693	9.04161	3.48387	0.43683	0.242943	6.26274	0.339886	4.16414
Igf2	chr7	142658712	142660712	9.04161	3.48387	0.43683	0.242943	6.26274	0.339886	4.16414
Cdx1	chr18	61035199	61037199	8.41372	3.34988	0.273019	0.364415	5.8818	0.318717	4.16379
Trpm2	chr10	77968854	77970854	6.65563	2.27792	0.163811	0.315826	4.46677	0.239819	4.16351
Fam189a1	chr7	65155570	65157570	2.63714	2.05459	0	0.242943	2.34586	0.121472	4.16343
Ccdc106	chr7	5056026	5058026	14.1903	5.94045	0.546037	0.558769	10.0654	0.552403	4.16309
Reep1	chr6	71706561	71708561	6.90679	2.23325	0.273019	0.218649	4.57002	0.245834	4.16208
Vcan	chr13	89741244	89743244	5.14869	2.90323	0.163811	0.267237	4.02596	0.215524	4.16156
Adamts20	chr15	94403350	94405350	3.26503	2.72457	0	0.315826	2.9948	0.157913	4.16148
Zwint	chr10	73098435	73100435	2.63714	3.34988	0	0.315826	2.99351	0.157913	4.16086
Zwint	chr10	73098453	73100453	2.63714	3.34988	0	0.315826	2.99351	0.157913	4.16086
Smoc2	chr17	14278506	14280506	3.64176	1.47395	0	0.267237	2.55785	0.133619	4.16025
Epha5	chr5	84415921	84417921	5.65101	1.51861	0.163811	0.218649	3.58481	0.19123	4.159
Epha5	chr5	84415921	84417921	5.65101	1.51861	0.163811	0.218649	3.58481	0.19123	4.159
Epha5	chr5	84415921	84417921	5.65101	1.51861	0.163811	0.218649	3.58481	0.19123	4.159
4930526D03Rik	chr2	181696416	181698416	13.688	6.3871	0.109207	0.996067	10.0375	0.552637	4.15849
Svep1	chr4	58205596	58207596	4.26965	1.9206	0.109207	0.218649	3.09512	0.163928	4.15809
Zfp579	chr7	4995158	4997158	8.16256	5.94045	0.163811	0.607358	7.05151	0.385584	4.15792
Dusp26	chr8	31088638	31090638	4.26965	3.43921	0	0.413003	3.85443	0.206502	4.15781
Cnpy1	chr5	28209022	28211022	6.40447	2.8139	0.327622	0.17006	4.60919	0.248841	4.1575
Pitx3	chr19	46147375	46149375	8.28814	4.82382	0.327622	0.388709	6.55598	0.358166	4.15658
Scrt1	chr15	76520902	76522902	16.074	6.20844	0.600641	0.631652	11.1412	0.616146	4.15456
Csf1	chr3	107759221	107761221	3.13945	1.51861	0	0.242943	2.32903	0.121472	4.15309
Nfkb1	chr3	135690546	135692546	3.13945	1.51861	0	0.242943	2.32903	0.121472	4.15309
Atp6v1c2	chr12	17323703	17325703	14.4415	7.59305	0.709848	0.51018	11.0173	0.610014	4.15263
Atp6v1c2	chr12	17323712	17325712	14.4415	7.59305	0.709848	0.51018	11.0173	0.610014	4.15263
Cltb	chr13	54610344	54612344	2.76271	1.0273	0	0.194354	1.895	0.0971772	4.15172
Ankrd33b	chr15	31366726	31368726	6.78121	5.31514	0.273019	0.388709	6.04817	0.330864	4.15162
Ankrd33b	chr15	31366726	31368726	6.78121	5.31514	0.273019	0.388709	6.04817	0.330864	4.15162
Hsd17b1	chr11	101077411	101079411	12.5578	5.3598	0.600641	0.388709	8.9588	0.494675	4.15149
Pde10a	chr17	8800779	8802779	3.01387	2.50124	0	0.291532	2.75756	0.145766	4.15116
Vcan	chr13	89741334	89743334	6.02774	3.26055	0.163811	0.34012	4.64414	0.251966	4.15107
Oxct2b	chr4	123115686	123117686	5.90216	3.48387	0.218415	0.291532	4.69302	0.254973	4.14967
Bcl6b	chr11	70228798	70230798	4.26965	2.09926	0	0.34012	3.18445	0.17006	4.14902
Lrp3	chr7	35214292	35216292	2.38598	1.07196	0.0546037	0.121472	1.72897	0.0880376	4.14875
Gm10748	chr3	5213763	5215763	7.4091	6.16377	0.163811	0.583063	6.78644	0.373437	4.14772
Rap1gap2	chr11	74589186	74591186	10.1718	6.29777	0.546037	0.364415	8.23479	0.455226	4.14748
Cyp26c1	chr19	37684581	37686581	6.90679	5.04715	0.218415	0.437298	5.97697	0.327856	4.14734
Qrfpr	chr3	36221275	36223275	7.4091	2.27792	0.163811	0.364415	4.84351	0.264113	4.14619
Qrfpr	chr3	36221275	36223275	7.4091	2.27792	0.163811	0.364415	4.84351	0.264113	4.14619
Zeb2	chr2	45112279	45114279	12.9345	7.05707	0.600641	0.51018	9.9958	0.555411	4.14539
Zeb2	chr2	45112279	45114279	12.9345	7.05707	0.600641	0.51018	9.9958	0.555411	4.14539
Podxl2	chr6	88873377	88875377	7.53467	3.21588	0.273019	0.315826	5.37528	0.294422	4.14488
4930542C12Rik	chr9	78395158	78397158	19.9669	8.1737	1.03747	0.534475	14.0703	0.785973	4.14481
Mras	chr9	99435718	99437718	5.02312	2.50124	0.163811	0.242943	3.76218	0.203377	4.14392
Tmem132c	chr5	127240826	127242826	3.51618	4.10918	0.218415	0.194354	3.81268	0.206385	4.14292
Kcna6	chr6	126735811	126737811	5.77658	2.8139	0.0546037	0.413003	4.29524	0.233803	4.1423
Sez6	chr11	77930012	77932012	5.14869	1.29529	0.0546037	0.291532	3.22199	0.173068	4.14197
Fezf2	chr14	12344865	12346865	8.16256	8.12903	0.491433	0.413003	8.1458	0.452218	4.14118
Dll4	chr2	119327538	119329538	14.0647	6.07444	0.491433	0.631652	10.0696	0.561543	4.14043
Cyp46a1	chr12	108333377	108335377	6.15332	2.63524	0.163811	0.315826	4.39428	0.239819	4.13995
Tpm2	chr4	43522595	43524595	5.02312	2.59057	0	0.413003	3.80684	0.206502	4.13993
Flrt2	chr12	95691226	95693226	9.29277	6.87841	0.43683	0.461592	8.08559	0.449211	4.13991
Olfr1466	chr19	13340760	13342760	1.88367	0.26799	0.0546037	0.0485886	1.07583	0.0515962	4.13981
Tgfbr3	chr5	107288595	107290595	7.4091	1.69727	0.109207	0.388709	4.55318	0.248958	4.13925
Csf1	chr3	107759236	107761236	3.13945	1.47395	0	0.242943	2.3067	0.121472	4.13925
Sned1	chr1	93234851	93236851	5.77658	1.83127	0	0.413003	3.80393	0.206502	4.13883
Dnaic2	chr11	114726408	114728408	4.01849	1.87593	0	0.315826	2.94721	0.157913	4.13845
Dnaic2	chr11	114726412	114728412	4.01849	1.87593	0	0.315826	2.94721	0.157913	4.13845
Dnaic2	chr11	114726416	114728416	4.01849	1.87593	0	0.315826	2.94721	0.157913	4.13845
Dcdc2a	chr13	25055004	25057004	5.14869	2.45658	0	0.413003	3.80264	0.206502	4.13834
Sox30	chr11	45979310	45981310	13.5624	5.67246	0.709848	0.364415	9.61744	0.537131	4.13719
Svep1	chr4	58205688	58207688	4.26965	1.83127	0.109207	0.218649	3.05046	0.163928	4.13718
Svep1	chr4	58205859	58207859	4.26965	1.83127	0.109207	0.218649	3.05046	0.163928	4.13718
Vcan	chr13	89741322	89743322	6.02774	3.17122	0.163811	0.34012	4.59948	0.251966	4.13715
Sstr4	chr2	148394377	148396377	2.63714	2.50124	0.0546037	0.218649	2.56919	0.136626	4.1367
Csf1	chr3	107759469	107761469	3.26503	1.33995	0	0.242943	2.30249	0.121472	4.13662
Lhx9	chr1	138847576	138849576	4.77196	1.42928	0.163811	0.17006	3.10062	0.166936	4.13591
Slc24a2	chr4	87229467	87231467	4.64638	1.87593	0.109207	0.242943	3.26116	0.176075	4.13584
Rasgrf1	chr9	89908775	89910775	3.51618	3.21588	0.218415	0.145766	3.36603	0.18209	4.13547
Rasgrf1	chr9	89908775	89910775	3.51618	3.21588	0.218415	0.145766	3.36603	0.18209	4.13547
Podxl2	chr6	88873045	88875045	7.28352	2.85856	0.218415	0.34012	5.07104	0.279268	4.13465
Lrrc26	chr2	25288915	25290915	10.5485	6.3871	0.655245	0.291532	8.46782	0.473388	4.13244
AI118078	chr9	55325913	55327913	7.66025	2.6799	0.109207	0.461592	5.17008	0.2854	4.13223
AI118078	chr9	55325949	55327949	7.66025	2.6799	0.109207	0.461592	5.17008	0.2854	4.13223
Zfp9	chr6	118478320	118480320	4.39523	5.09181	0.109207	0.413003	4.74352	0.261105	4.13207
Vash2	chr1	190978296	190980296	2.00925	0.982631	0.0546037	0.0971772	1.49594	0.0758905	4.13202
Sphk1	chr11	116530744	116532744	11.1764	9.37966	0.109207	1.04466	10.278	0.576931	4.13163
Pde10a	chr17	8800745	8802745	2.88829	2.54591	0	0.291532	2.7171	0.145766	4.12992
Epha5	chr5	84416382	84418382	4.26965	1.47395	0.163811	0.145766	2.8718	0.154788	4.12828
Epha5	chr5	84416382	84418382	4.26965	1.47395	0.163811	0.145766	2.8718	0.154788	4.12828
Hoxb9	chr11	96270457	96272457	13.688	5.85112	0.709848	0.388709	9.76956	0.549279	4.12813
Zeb2	chr2	45112245	45114245	13.3113	6.96774	0.655245	0.485886	10.1395	0.570565	4.12781
Epha6	chr16	60604531	60606531	4.14407	0.53598	0.0546037	0.194354	2.34003	0.124479	4.12722
H2-Q1	chr17	35319558	35321558	9.04161	3.48387	0.382226	0.315826	6.26274	0.349026	4.12694
Smarcd3	chr5	24600935	24602935	5.77658	3.88586	0.218415	0.315826	4.83122	0.26712	4.12679
Apbb1ip	chr2	22773094	22775094	6.40447	3.5732	0.163811	0.388709	4.98884	0.27626	4.12619
Apbb1ip	chr2	22773094	22775094	6.40447	3.5732	0.163811	0.388709	4.98884	0.27626	4.12619
C1qtnf4	chr2	90884860	90886860	9.04161	5.27047	0.43683	0.364415	7.15604	0.400622	4.12529
Ptger4	chr15	5241710	5243710	8.41372	4.19851	0.218415	0.485886	6.30612	0.35215	4.12438
Actrt3	chr3	30508822	30510822	6.02774	3.61787	0.218415	0.315826	4.8228	0.26712	4.12428
6430548M08Rik	chr8	120113152	120115152	5.65101	4.42184	0	0.558769	5.03642	0.279385	4.1242
6430548M08Rik	chr8	120113152	120115152	5.65101	4.42184	0	0.558769	5.03642	0.279385	4.1242
Mkx	chr18	7003714	7005714	5.90216	2.14392	0.273019	0.17006	4.02304	0.221539	4.12254
Col2a1	chr15	97998465	98000465	7.53467	5.58313	0.273019	0.461592	6.5589	0.367305	4.12185
Cntln	chr4	84883309	84885309	4.89754	2.18859	0.218415	0.17006	3.54306	0.194237	4.12074
Mlxipl	chr5	135105891	135107891	7.28352	4.01985	0.218415	0.413003	5.65169	0.315709	4.11958
Mlxipl	chr5	135105902	135107902	7.28352	4.01985	0.218415	0.413003	5.65169	0.315709	4.11958
Mlxipl	chr5	135105904	135107904	7.28352	4.01985	0.218415	0.413003	5.65169	0.315709	4.11958
Mlxipl	chr5	135105913	135107913	7.28352	4.01985	0.218415	0.413003	5.65169	0.315709	4.11958
Mlxipl	chr5	135105913	135107913	7.28352	4.01985	0.218415	0.413003	5.65169	0.315709	4.11958
Mlxipl	chr5	135105913	135107913	7.28352	4.01985	0.218415	0.413003	5.65169	0.315709	4.11958
Grrp1	chr4	134252023	134254023	10.6741	6.20844	0.491433	0.461592	8.44128	0.476513	4.11862
Dusp26	chr8	31088804	31090804	4.39523	3.52854	0	0.437298	3.96188	0.218649	4.11862
Zeb2	chr2	45112508	45114508	12.9345	7.10174	0.600641	0.534475	10.0181	0.567558	4.11794
6430548M08Rik	chr8	120113153	120115153	5.65101	4.37717	0	0.558769	5.01409	0.279385	4.1178
Nptx2	chr5	144544887	144546887	4.01849	2.94789	0.163811	0.218649	3.48319	0.19123	4.11763
Vcan	chr13	89741318	89743318	5.90216	3.17122	0.163811	0.34012	4.53669	0.251966	4.11737
Wrap73	chr4	154141409	154143409	10.2974	7.19107	0.382226	0.607358	8.74423	0.494792	4.11622
Hck	chr2	153107468	153109468	6.2789	2.6799	0.109207	0.388709	4.4794	0.248958	4.11573
Hck	chr2	153107468	153109468	6.2789	2.6799	0.109207	0.388709	4.4794	0.248958	4.11573
Gfi1	chr5	107722961	107724961	9.92066	6.29777	0.382226	0.534475	8.10921	0.45835	4.11568
Osmr	chr15	6873969	6875969	4.5208	2.32258	0.109207	0.267237	3.42169	0.188222	4.11373
Osmr	chr15	6873969	6875969	4.5208	2.32258	0.109207	0.267237	3.42169	0.188222	4.11373
Abhd15	chr11	77514984	77516984	3.13945	2.54591	0.163811	0.145766	2.84268	0.154788	4.11363
Cdkn2a	chr4	89281192	89283192	14.567	5.09181	0.655245	0.461592	9.82943	0.558418	4.11355
Cpeb1	chr7	81454465	81456465	6.40447	3.79653	0.327622	0.242943	5.1005	0.285283	4.1133
[truncated: 5,554 more rows]
