# Supplementary material for: Chromatin dynamics and the role of G9a in gene regulation and enhancer silencing during early mouse development
Source: eLife. 2015 Nov 9;4:e09571. doi: 10.7554/eLife.09571 (PMC4729692; doi:10.7554/eLife.09571)
Supplement: Figure 5—source data 2. — Enrichment was called by k-means clustering. DOI: http://dx.doi.org/10.7554/eLife.09571.020 [file elife-09571-fig5-data2.xls]

## Sheet: H3K9me2 gene body
List of gene bodies enriched for H3K9me2 in E6.25 epiblast sample. A threshold was set based on kmeans clustering (3 clusters) of average Log2(H3K9me2/Input) enrichment. All elements with insufficient coverage in the input sample were removed (RPKM>0.1)
Gene.ID	chr	start	stop	Epiblast.H3K9me2.25k.1.bed.rpkm	Epiblast.H3K9me2.25k.2.bed.rpkm	Epiblast.H3K9me2.25k.input.1.bed.rpkm	Epiblast.H3K9me2.25k.input.2.bed.rpkm	Epiblast.H3K9me2.25k.mean.rpkm	Epiblast.Input.25k.mean.rpkm	Epiblast.Log2.H3K9me2.vs.Input.25k.mean
Dbh	chr2	27177093	27177372	2.43581	0.954724	0	0.420535	1.69527	0.210268	2.94504
Entpd2	chr2	25398753	25399849	2.1553	0.438634	0	0.322014	1.29697	0.161007	2.92413
Uba7	chr9	107975606	107976150	1.25143	0.1962	0.0959231	0.108027	0.723814	0.101975	2.69443
Trim30c	chr7	104411685	104412267	0.623925	1.28388	0.179342	0.100986	0.953904	0.140164	2.66882
Ms4a6c	chr19	11462489	11463288	1.36406	0.400984	0.261391	0	0.88252	0.130695	2.65069
Olfr51	chr11	51006974	51007897	1.23021	0.347172	0.113156	0.127435	0.788691	0.120295	2.5995
Bnc2	chr4	84741475	84742291	0.612183	0.719841	0	0.216187	0.666012	0.108093	2.49778
Olfr646	chr7	104106281	104107219	1.45267	1.25263	0.111348	0.376198	1.35265	0.243773	2.41524
Ajap1	chr4	153218176	153218595	0.974326	0.509186	0.124472	0.140178	0.741756	0.132325	2.3837
Ube2d4	chr15	58846590	58847321	0.496924	0.657351	0.142836	0.0804302	0.577137	0.111633	2.24887
Ctdsp1	chr1	74383600	74385197	1.76411	0.936801	0.261718	0.294743	1.35046	0.27823	2.22922
Thoc1	chr18	9916895	9917755	0.844944	0.372575	0.182154	0.0683797	0.608759	0.125267	2.17243
Ins2	chr7	142678713	142679533	1.66146	0.651213	0	0.501979	1.15633	0.250989	2.14874
Gm4845	chr1	141256568	141257158	1.69257	0.99511	0.088457	0.498096	1.34384	0.293276	2.14873
Olfr572	chr7	102927630	102928586	0.855207	0.279334	0.0546271	0.184561	0.567271	0.119594	2.13258
Rpl27-ps3	chr18	6332590	6333064	0.765786	0.337671	0.110059	0.123947	0.551728	0.117003	2.12171
Slc5a2	chr7	128266370	128266774	1.57175	0.264022	0.258164	0.14537	0.917887	0.201767	2.11741
Olfr1404	chr1	173215607	173216640	1.36318	0.775598	0.303355	0.170817	1.06939	0.237086	2.11505
Olfr1440	chr19	12394265	12395212	1.96647	1.12794	0.38602	0.310522	1.54721	0.348271	2.11147
B3gat1	chr9	26767497	26768470	1.5872	0.988051	0.214694	0.362679	1.28762	0.288687	2.10913
Olfr575	chr7	102954664	102955620	0.902719	0.446935	0.109254	0.184561	0.674827	0.146908	2.10674
1700021A07Rik	chr10	21425342	21425650	1.03003	0.692098	0	0.381067	0.861065	0.190534	2.10395
Olfr324	chr11	58597345	58598466	1.17521	0.571813	0.186375	0.209893	0.873512	0.198134	2.07097
Vmn1r82	chr7	12304805	12305719	0.993848	0.584312	0.228538	0.128688	0.78908	0.178613	2.06657
Pim1	chr17	29519281	29519790	0.624078	0.314497	0.205012	0	0.469288	0.102506	2.06354
Gm11565	chr11	99914751	99915671	1.23422	0.116101	0.113525	0.191775	0.675159	0.15265	2.05559
Uba7	chr9	107976308	107976966	2.69085	0.486779	0.396647	0.357359	1.58882	0.377003	2.03844
Olfr120	chr17	37725999	37726991	0.96157	0.215366	0.210587	0.05929	0.588468	0.134938	2.02397
Krt15	chr11	100133035	100134398	0.966706	0.274378	0.114981	0.172654	0.620542	0.143817	2.01463
Cyp2d37-ps	chr15	82689134	82690499	1.73087	0.234837	0.382709	0.0862005	0.982852	0.234455	2.00887
Olfr1504	chr19	13887221	13888305	1.13147	0.591313	0.19273	0.21705	0.861394	0.20489	2.00475
1700034O15Rik	chr6	41688434	41688959	1.21019	0.508218	0.298164	0.11193	0.859204	0.205047	2.00003
Gm5160	chr18	14424868	14425311	1.5361	0.481663	0.35323	0.132601	1.00888	0.242916	1.99746
Slc5a2	chr7	128266343	128267478	1.08068	0.188255	0.0920389	0.207306	0.634467	0.149672	1.9927
Qsox1	chr1	155794343	155795417	1.26889	0.44761	0.194523	0.219069	0.85825	0.206796	1.98674
Ins2	chr7	142678709	142679580	1.825	0.613126	0.059952	0.540137	1.21906	0.300044	1.97641
Olfr1450	chr19	12953591	12954568	1.6272	0.656007	0.320725	0.240797	1.1416	0.280761	1.97442
Calml3	chr13	3802893	3804318	1.27541	0.862332	0.293285	0.247721	1.06887	0.270503	1.93135
Olfr531	chr7	140400130	140401044	0.84477	0.642743	0.114269	0.257377	0.743757	0.185823	1.92722
Utp6	chr11	79781979	79782887	0.900367	0.76462	0.172535	0.259076	0.832493	0.215805	1.88409
C030048H21Rik	chr2	26246333	26246707	1.81874	0.570289	0	0.627999	1.19451	0.314	1.88357
Olfr1346	chr7	6474088	6475153	2.26063	0.852624	0.441372	0.386608	1.55663	0.41399	1.87725
1700029P11Rik	chr15	81980540	81981563	0.799251	0.678749	0.153159	0.22998	0.739	0.191569	1.87625
Folr4	chr9	14900770	14903754	1.82788	0.698532	0.157622	0.512813	1.26321	0.335218	1.87265
Olfr360	chr2	37068307	37069260	1.23918	0.784595	0.164397	0.370283	1.01189	0.26734	1.86875
Ear6	chr14	51853699	51854591	0.560083	0.83819	0.234168	0.131859	0.699136	0.183014	1.85893
Foxn4	chr5	114248333	114248958	0.581067	0.427033	0.167023	0.0940494	0.50405	0.130536	1.84549
Actl9	chr17	33432897	33434268	2.51866	0.818335	0.609657	0.300382	1.6685	0.45502	1.84405
Ctdsp1	chr1	74383341	74384173	2.34711	1.34785	0.376553	0.636104	1.84748	0.506328	1.83998
Ins2	chr7	142678661	142679717	1.8067	0.606977	0.0989179	0.557	1.20684	0.327959	1.83751
Bhlhe23	chr2	180847652	180849046	0.684472	0.536562	0.112426	0.211021	0.610517	0.161724	1.8323
Olfr1501	chr19	13838224	13839171	1.10314	0.620369	0.220583	0.248417	0.861754	0.2345	1.81912
Gm10335	chr10	14523062	14523571	0.624078	0.209665	0.102506	0.115441	0.416871	0.108974	1.81242
Ttc25	chr11	100549547	100550328	1.04659	0.273476	0.133704	0.225863	0.660033	0.179783	1.80037
Olfr1453	chr19	13027404	13028327	1.13179	0.636483	0.169734	0.318587	0.884138	0.244161	1.80016
Ear6	chr14	51853768	51854643	0.622857	0.976522	0.238713	0.201626	0.799689	0.22017	1.79854
Gm4825	chr15	85510812	85511222	1.10629	0.780504	0.381592	0.143248	0.943397	0.26242	1.79356
Olfr577	chr7	102973052	102973990	0.677912	0.227751	0.0556742	0.188099	0.452832	0.121887	1.78286
Slc4a11	chr2	130690833	130691982	0.711681	0.371927	0.0909185	0.204782	0.541804	0.14785	1.78187
Prr13	chr15	102452323	102452871	1.65641	1.55817	0.380897	0.536201	1.60729	0.458549	1.77925
4930526D03Rik	chr2	181696796	181697416	1.97689	0.258283	0.168368	0.474033	1.11759	0.3212	1.7559
Adamtsl1	chr4	86276489	86277102	1.18485	0.174152	0	0.38355	0.6795	0.191775	1.75385
Gm11938	chr11	99602646	99603308	0.54864	0.645123	0.157702	0.177602	0.596881	0.167652	1.75081
Olfr1500	chr19	13827435	13828459	1.41951	0.469445	0.255015	0.287195	0.944475	0.271105	1.74993
Olfr1313	chr2	112071646	112072583	1.3088	0.74098	0.278668	0.313832	1.02489	0.29625	1.74409
Fpr-rs4	chr17	17970458	17971677	1.49077	0.350587	0.385658	0.144774	0.920679	0.265216	1.7437
Gpr15	chr16	58717435	58718724	0.634445	0.414454	0.202628	0.0912789	0.524449	0.146954	1.74321
Olfr319	chr11	58701703	58702623	0.888636	0.812708	0.170287	0.319625	0.850672	0.244956	1.74005
Ins2	chr7	142678659	142679692	1.84688	0.620478	0.151677	0.56939	1.23368	0.360534	1.73646
Ins2	chr7	142678659	142679698	1.83623	0.616899	0.150802	0.566105	1.22656	0.358454	1.73624
Olfr1537	chr9	39237487	39238431	0.433034	0.622339	0.110642	0.186905	0.527686	0.148773	1.73545
Ins2	chr7	142678659	142679726	1.78809	0.600725	0.146849	0.551263	1.19441	0.349056	1.73522
Olfr323	chr11	58625073	58626044	1.16946	0.440037	0.161352	0.302855	0.804748	0.232103	1.73471
6430548M08Rik	chr8	120144463	120145518	1.03338	0.75944	0.297035	0.223011	0.896408	0.260023	1.73268
Kcnh2	chr5	24325448	24326519	0.63622	0.299242	0.0975338	0.164762	0.467731	0.131148	1.73155
Lcn3	chr2	25765569	25768099	1.38328	0.866079	0.309827	0.348923	1.12468	0.329375	1.72984
Wdr33	chr18	31819862	31820413	0.247112	0.48428	0.0947067	0.106657	0.365696	0.100682	1.72816
Olfr564	chr7	102803480	102804430	0.478113	0.337316	0.164915	0.0619084	0.407714	0.113412	1.72761
Olfr684	chr7	105156742	105157680	1.01687	0.683253	0.0556742	0.438897	0.850061	0.247286	1.72589
Olfr750	chr14	51070311	51071442	0.963997	0.566762	0.184728	0.260048	0.76538	0.222388	1.72152
Gm21726	chr13	90583400	90583765	0.993848	2.19117	0.142836	0.804302	1.59251	0.473569	1.72041
C130026I21Rik	chr1	85326738	85326921	1.48267	1.74341	0	0.959917	1.61304	0.479959	1.71994
Olfr1131	chr2	87628465	87629394	0.195564	0.632376	0.168639	0.0633064	0.41397	0.115973	1.7199
Olfr456	chr6	42519516	42520325	0.729742	0.396034	0.322704	0	0.562888	0.161352	1.71844
Olfr12	chr1	92619881	92621001	0.973456	1.24003	0.233176	0.42016	1.10675	0.326668	1.71823
Olfr651	chr7	104552884	104553952	1.40361	0.350095	0.293423	0.220299	0.876854	0.256861	1.71789
Olfr311	chr11	58841116	58842042	0.735737	0.11535	0.11279	0.127022	0.425543	0.119906	1.71522
Cxcl16	chr11	70460137	70460896	0.658097	0.844177	0.206361	0.232401	0.751137	0.219381	1.71325
H2-M1	chr17	36670008	36672219	1.10999	0.676767	0.259973	0.266161	0.893379	0.263067	1.71163
Olfr224	chr11	58566399	58567343	1.01041	0.226305	0.110642	0.249206	0.618358	0.179924	1.70535
Gm4945	chr17	47042584	47043039	0.59827	0.586234	0.343935	0	0.592252	0.171967	1.70496
Rnf112	chr11	61452263	61453919	0.576246	0.258127	0.0946496	0.142124	0.417186	0.118387	1.70365
Olfr996	chr2	85579215	85580282	0.340588	0.400484	0.0978991	0.110253	0.370536	0.104076	1.70351
Olfr202	chr16	59283572	59284495	0.738125	0.636483	0.339468	0.0637174	0.687304	0.201593	1.70176
Serpina1f	chr12	103689636	103694716	1.21703	0.568212	0.205779	0.324444	0.89262	0.265111	1.69965
Olfr1223	chr2	89144086	89145021	0.922972	1.02816	0.335116	0.251602	0.975568	0.293359	1.68669
Olfr671	chr7	104975042	104975983	0.724021	0.454051	0.221988	0.125	0.589036	0.173494	1.68507
Gtsf1l	chr2	163087038	163087783	0.426648	0.788351	0.280312	0.0789208	0.6075	0.179616	1.68217
Cyp2d40	chr15	82759835	82764183	1.1605	0.762199	0.33658	0.243676	0.961348	0.290128	1.68098
Sppl2c	chr11	104186327	104188551	1.63482	0.528638	0.258454	0.39691	1.08173	0.327682	1.68094
Olfr574	chr7	102948467	102949507	1.35401	1.07854	0.401753	0.339337	1.21627	0.370545	1.67751
Alx4	chr2	93703539	93704509	0.468265	0.495552	0.161518	0.121267	0.481908	0.141392	1.67346
Olfr523	chr7	140176061	140177116	1.29172	0.405034	0.346541	0.167258	0.848377	0.256899	1.67011
Vmn1r25	chr6	57978299	57979351	0.99314	0.558509	0.248234	0.223646	0.775824	0.23594	1.65928
Olfr1394	chr11	49169322	49170675	0.705199	0.236918	0.193051	0.0869644	0.471059	0.140008	1.65393
Olfr594	chr7	103219643	103220729	0.836587	0.491854	0.24047	0.162488	0.664221	0.201479	1.65332
Svil	chr18	5094381	5095516	1.24078	0.753022	0.0460195	0.570092	0.9969	0.308056	1.64962
Ehmt2	chr17	34905203	34906251	0.693514	0.0509672	0.0498361	0.168374	0.372241	0.109105	1.64787
Kcne4	chr1	78967637	78968079	1.02638	1.32756	0.472037	0.265801	1.17697	0.368919	1.63634
H2-M10.3	chr17	36365004	36368417	0.572685	0.40717	0.10719	0.189697	0.489928	0.148443	1.63154
Olfr456	chr6	42538067	42539020	1.33451	0.168128	0.219195	0.246855	0.751317	0.233025	1.63023
Vmn1r175	chr7	23808286	23809200	0.496924	0.292156	0.171404	0.0643442	0.39454	0.117874	1.6291
Folr4	chr9	14900023	14903932	1.59314	0.697364	0.240666	0.481841	1.14525	0.361254	1.62645
Olfr699	chr7	106790049	106790999	1.24309	0.281096	0.164915	0.309542	0.762095	0.237229	1.62602
Folr4	chr9	14900028	14903756	1.65828	0.731213	0.252348	0.505229	1.19475	0.378788	1.62085
B430306N03Rik	chr17	48316424	48318211	0.483167	0.358823	0.0584766	0.197567	0.420995	0.128022	1.61233
Olfr281	chr15	98456312	98457247	1.40875	0.399842	0.446821	0.125801	0.904294	0.286311	1.61127
Olfr1395	chr11	49148259	49149212	0.857897	0.22417	0.273994	0.0617138	0.541033	0.167854	1.60769
Olfr685	chr7	105180313	105181400	1.25373	0.687963	0.240249	0.378791	0.970845	0.30952	1.60482
Olfr1472	chr19	13453571	13454515	0.433034	0.509186	0.165962	0.124603	0.47111	0.145283	1.60423
Cyp2d11	chr15	82389154	82394022	0.821777	0.263534	0.193265	0.145101	0.542656	0.169183	1.60126
Olfr642	chr7	104049408	104050352	1.15476	0.961796	0.0553208	0.623015	1.05828	0.339168	1.60109
Wnt9b	chr11	103723950	103724532	0.935887	0.550236	0.269013	0.201972	0.743061	0.235492	1.59974
Acap1	chr11	69889374	69890491	0.89473	0.669502	0.233802	0.263305	0.782116	0.248553	1.59876
Olfr622	chr7	103639132	103640236	0.493776	0.532226	0	0.319683	0.513001	0.159841	1.59758
Olfr1183	chr2	88461342	88462253	0.59827	0.410364	0.0573225	0.258223	0.504317	0.157773	1.59068
Slc7a9	chr7	35449098	35450070	1.49537	1.20886	0.214915	0.665595	1.35211	0.440255	1.58747
Olfr1375-ps1	chr11	51048109	51049050	1.11017	0.510808	0.332982	0.1875	0.810487	0.260241	1.58632
Olfr462	chr11	87888959	87889894	0.825817	0.342721	0.0558527	0.314503	0.584269	0.185178	1.58431
Med9	chr11	59921499	59921889	0.814015	0.546952	0.133704	0.30115	0.680483	0.217427	1.58327
Olfr315	chr11	58778089	58779086	2.27798	0.696432	0.680977	0.294965	1.48721	0.487971	1.57944
Ins2	chr7	142678656	142679685	1.76577	0.622888	0.152266	0.628761	1.19433	0.390514	1.57748
Atp1b2	chr11	69601358	69603613	2.31777	0.61617	0.417113	0.548038	1.46697	0.482575	1.5754
Cenpb	chr2	131177291	131180012	0.467714	0.255341	0.115235	0.108146	0.361528	0.111691	1.57488
Olfr843	chr9	19248357	19249463	0.492884	0.338078	0.047225	0.212737	0.415481	0.129981	1.57302
Muc5b	chr7	141810332	141819231	1.19036	0.402486	0.258454	0.257991	0.796421	0.258222	1.57191
Mtmr4	chr11	87589477	87590539	0.898249	0.402367	0.196719	0.221543	0.650308	0.209131	1.57155
1700034O15Rik	chr6	41686354	41687851	0.667762	0.178453	0.0697972	0.196512	0.423108	0.133154	1.56686
Vmn1r237	chr17	21313963	21314909	1.05629	0.790395	0.110408	0.497359	0.923343	0.303884	1.5582
Ctdsp1	chr1	74383034	74383834	1.98676	1.20145	0.261064	0.80852	1.59411	0.534792	1.54988
Olfr450	chr6	42817473	42818405	0.779739	0.343823	0.112065	0.252411	0.561781	0.182238	1.54968
Olfr364-ps1	chr2	37146214	37147137	0.541292	0.405034	0.113156	0.191152	0.473163	0.152154	1.54802
Olfr772	chr10	129174051	129175054	0.362299	0.319509	0.156209	0.0586404	0.340904	0.107425	1.54185
Smco3	chr6	136839764	136840507	1.10005	0.71861	0.210799	0.395665	0.909327	0.303232	1.53915
Slc7a10	chr7	35198917	35200769	1.00605	0.721324	0.225702	0.3495	0.863687	0.287601	1.5388
Mrpl23	chr7	142576507	142578095	0.686749	0.5047	0.1316	0.259361	0.595725	0.19548	1.53806
Myo1g	chr11	6519047	6519504	1.78697	0.466939	0.114144	0.642739	1.12696	0.378442	1.53794
Nat8b	chr6	85932681	85933379	0.455336	0.305949	0.0747899	0.168455	0.380642	0.121622	1.53582
Pik3cg	chr12	32200551	32201009	1.38684	0.815364	0.227791	0.513071	1.1011	0.370431	1.53455
Olfr535	chr7	140492617	140493607	1.37644	0.647401	0.263764	0.415867	1.01192	0.339816	1.53386
Spem1	chr11	69828044	69828559	1.32176	0.31084	0.202628	0.342296	0.8163	0.272462	1.53281
Prm2	chr16	10791383	10792105	1.69799	1.18317	0.650765	0.325726	1.44058	0.488245	1.53273
Thbs1	chr2	118122940	118123764	1.10227	0.324028	0.190102	0.285454	0.713147	0.237778	1.52717
Ehmt2	chr17	34905240	34906040	0.624412	0.0667473	0	0.220505	0.34558	0.110253	1.52712
Ptgs1	chr2	36242475	36245205	0.749207	0.430692	0.15314	0.237138	0.589949	0.195139	1.52643
Cyp2d9	chr15	82452377	82456827	1.2667	0.636626	0.258396	0.383593	0.951665	0.320994	1.52516
Sppl2c	chr11	104186327	104191163	1.06222	0.331597	0.172927	0.292123	0.696907	0.232525	1.5249
Nkg7	chr7	43437073	43438246	0.96824	0.0455405	0.13359	0.200596	0.50689	0.167093	1.52001
Mtss1l	chr8	110737117	110738381	0.539153	0.507174	0.206633	0.139624	0.523163	0.173129	1.51716
Mpo	chr11	87802538	87803825	0.988446	0.373588	0.365297	0.0914207	0.681017	0.228359	1.51667
Serpina1f	chr12	103688044	103694666	1.18769	0.66195	0.228909	0.400026	0.924819	0.314468	1.51266
Pygl	chr12	70197399	70197841	0.718464	0.724125	0.354028	0.1329	0.721295	0.243464	1.51081
Slc26a9	chr1	131750383	131751087	2.19281	0.530854	0.519073	0.417553	1.36183	0.468313	1.51058
Olfr347	chr2	36734319	36735261	1.25364	0.340177	0.166314	0.374602	0.796908	0.270458	1.50844
Mylpf	chr7	127214447	127215125	0.535712	0.472441	0.0769928	0.260125	0.504076	0.168559	1.5001
Gm5414	chr15	101624028	101628188	0.753984	0.282677	0.16333	0.18394	0.518331	0.173635	1.49981
Dhrs7c	chr11	67798277	67799066	1.26621	0.541413	0.397049	0.223576	0.903813	0.310312	1.49814
Olfr705	chr7	106873293	106874243	0.860603	0.337316	0.219887	0.185725	0.598959	0.202806	1.49533
Prps1l1	chr12	34984761	34986436	1.03091	0.893203	0.311922	0.351282	0.962056	0.331602	1.4953
Tas2r126	chr6	42434535	42435464	2.10231	0.804843	0.505917	0.506451	1.45358	0.506184	1.49464
Sergef	chr7	46649741	46651419	0.649937	0.732391	0.155682	0.315589	0.691164	0.235636	1.49459
Slc11a1	chr1	74381651	74384173	1.35162	0.784062	0.248647	0.490041	1.06784	0.369344	1.49447
Gh	chr11	106300271	106301865	1.08326	0.402241	0.360539	0.147649	0.742752	0.254094	1.49377
Tnnt3	chr7	142489813	142494517	1.15	0.738618	0.288891	0.362885	0.944309	0.325888	1.49281
Olfr169	chr16	19565940	19566881	0.627485	0.227026	0.221988	0.0624999	0.427255	0.142244	1.49209
Trim16	chr11	62820440	62821245	0.564126	0.265333	0.129722	0.146092	0.414729	0.137907	1.49095
Olfr720	chr14	14175095	14176117	2.00008	0.783938	0.511027	0.46041	1.39201	0.485719	1.49061
Prdm14	chr1	13062019	13062348	1.51562	0.486041	0.158419	0.535227	1.00083	0.346823	1.48936
Rnf112	chr11	61452045	61454131	0.544664	0.256179	0.125247	0.141052	0.400421	0.133149	1.4876
Gm8674	chr13	49976258	49976488	1.57467	0.462897	0.452624	0.25487	1.01878	0.353747	1.48725
Olfr566	chr7	102856321	102857271	0.621547	0.393535	0.219887	0.123817	0.507541	0.171852	1.4836
H2afy2	chr10	61848861	61851525	0.904252	0.601852	0.255015	0.265103	0.753052	0.260059	1.48139
Aqp3	chr4	41093782	41094448	1.49971	1.12219	0.39189	0.529609	1.31095	0.46075	1.47868
Olfr1287	chr2	111449142	111450059	0.69342	0.232961	0.0569478	0.256536	0.46319	0.156742	1.4771
Olfr1387	chr11	49459681	49460616	2.52603	1.08528	0.335116	0.943508	1.80566	0.639312	1.47634
Olfr1339	chr4	118734531	118735478	2.54202	0.789561	0.496311	0.683148	1.66579	0.589729	1.47469
Mroh4	chr15	74606415	74608228	0.852222	0.442099	0.317012	0.129823	0.647161	0.223418	1.47344
Olfr220	chr1	174448625	174449602	1.44123	0.820008	0.374179	0.421395	1.13062	0.397787	1.4725
Pm20d1	chr1	131812168	131812405	1.91044	1.57249	0	1.23687	1.74146	0.618434	1.4713
Tspan32	chr7	143017409	143018903	1.52069	0.250336	0.384655	0.236287	0.885511	0.310471	1.46794
Olfr314	chr11	58786139	58787269	1.52768	0.661807	0.462229	0.312334	1.09474	0.387281	1.46368
Serpina1f	chr12	103689633	103695529	1.24909	0.562117	0.248226	0.389371	0.905605	0.318798	1.46327
Tspyl5	chr15	33404972	33405976	0.361939	0.425588	0.208072	0.058582	0.393764	0.133327	1.46168
Olfr1132	chr2	87634819	87635745	0.833835	0.403724	0.11279	0.317556	0.618779	0.215173	1.46072
5430435G22Rik	chr1	131661911	131665446	1.14443	0.786243	0.266122	0.416254	0.965336	0.341188	1.46028
Olfr341	chr2	36479187	36480128	0.917093	0.737834	0.332982	0.25	0.827464	0.291491	1.45833
Olfr448	chr6	42896453	42897385	1.90061	0.802255	0.336194	0.631028	1.35143	0.483611	1.45411
Olfr317	chr11	58732096	58733223	0.40309	0.473977	0.0926917	0.208776	0.438533	0.150734	1.4513
Entpd2	chr2	25395916	25401292	0.837155	0.21875	0.126393	0.240887	0.527953	0.18364	1.44976
Olfr1371	chr11	52213052	52213987	0.874395	0.913924	0.446821	0.188702	0.894159	0.317762	1.4495
Olfr92	chr17	37111042	37111980	1.21056	0.284689	0.278371	0.250798	0.747623	0.264585	1.44699
Cd200r3	chr16	44965254	44966854	0.653202	0.434128	0.19592	0.183869	0.543665	0.189895	1.44613
Dad1	chr14	53795360	53797832	0.606737	0.194574	0.0845582	0.190457	0.400656	0.137507	1.44517
Gm5478	chr15	101643024	101647380	1.06445	0.294503	0.26397	0.216204	0.679474	0.240087	1.44411
Olfr1042	chr2	86159345	86160441	0.663169	0.584845	0.333589	0.107338	0.624007	0.220463	1.43933
Olfr1354	chr10	78916842	78917936	0.373714	0.24413	0.0477426	0.161301	0.308922	0.104522	1.43628
Ano2	chr6	125685737	125686635	1.01154	0.475769	0.465211	0.0654893	0.743652	0.26535	1.4353
Olfml3	chr3	103731680	103732553	0.936423	0.734067	0.0598148	0.538901	0.835245	0.299358	1.43465
Tctex1d1	chr4	102927190	102928912	0.95001	1.39635	0.303413	0.54672	1.17318	0.425067	1.43234
Krt16	chr11	100246091	100248902	0.582101	0.266182	0.148729	0.146559	0.424141	0.147644	1.43127
Kif12	chr4	63169407	63171730	1.03693	0.713167	0.224949	0.405335	0.87505	0.315142	1.42994
Olfr601	chr7	103358224	103359213	0.918556	0.216018	0.105612	0.297348	0.567287	0.20148	1.4261
Olfr130	chr17	38067173	38068126	0.857897	0.280213	0.219195	0.185141	0.569055	0.202168	1.42589
Scgb1b27	chr7	34021567	34022449	1.08136	0.302744	0.296026	0.200028	0.692051	0.248027	1.42544
Psd4	chr2	24401036	24403252	1.25105	0.699356	0.282967	0.424898	0.975204	0.353932	1.42351
Olfr126	chr17	37850594	37851553	0.426267	0.556922	0.163369	0.183984	0.491595	0.173677	1.42323
Vmn1r5	chr6	56985295	56986350	0.775032	0.253147	0.198023	0.167258	0.514089	0.182641	1.41891
Olfr1219	chr2	89074154	89075089	0.680085	0.342721	0.111705	0.251602	0.511403	0.181654	1.41878
Prss51	chr14	64093726	64097109	1.23614	0.663567	0.44801	0.243572	0.949855	0.345791	1.41819
Rhog	chr7	102235854	102237530	1.32854	0.765146	0.342909	0.421287	1.04684	0.382098	1.41813
8430432A02Rik	chr1	43032060	43033605	1.4117	0.933728	0.439596	0.418903	1.17271	0.42925	1.41797
Olfr250	chr9	38367548	38368543	1.09563	0.375755	0.472393	0.0591114	0.735691	0.265752	1.41769
Mroh4	chr15	74606403	74612012	1.02932	0.447921	0.260925	0.272861	0.738622	0.266893	1.41746
Pou3f3	chr1	42229726	42231108	0.920549	0.734509	0.302404	0.297993	0.827529	0.300199	1.41736
Olfr959	chr9	39572260	39573314	0.603374	0.405418	0.247764	0.111611	0.504396	0.179687	1.41379
Kcna6	chr6	126736688	126740151	0.590671	0.35499	0.16601	0.169962	0.47283	0.167986	1.41261
Rpl13-ps3	chr14	58893506	58894129	0.655796	0.342721	0.167558	0.188702	0.499259	0.17813	1.41095
Dcpp1	chr17	23880876	23882853	0.781562	0.324355	0.158579	0.238119	0.552959	0.198349	1.41078
Ada	chr2	163730015	163730866	1.65437	1.12953	0.613593	0.414612	1.39195	0.514102	1.41022
Krtap7-1	chr16	89507704	89508323	1.46673	1.46596	0.421598	0.664717	1.46635	0.543157	1.40745
Mroh4	chr15	74631559	74636298	0.988029	0.631649	0.330874	0.260838	0.809839	0.295856	1.40656
Olfr1487	chr19	13619164	13620111	0.527588	0.620369	0.165437	0.248417	0.573979	0.206927	1.4063
Olfr744	chr14	50618161	50619265	0.864108	0.628995	0.331174	0.213122	0.746551	0.272148	1.40572
Olfr1030	chr2	85983842	85984798	1.47286	0.893869	0.38239	0.492162	1.18336	0.437276	1.40487
Olfr980	chr9	40006015	40006947	0.633538	0.401127	0.0560323	0.315514	0.517333	0.185773	1.4047
Evc	chr5	37316216	37318491	1.21862	0.563774	0.344539	0.310413	0.891197	0.327476	1.40258
Gypc	chr18	32529792	32535418	1.10702	0.589089	0.371623	0.25111	0.848053	0.311367	1.40163
Rhog	chr7	102235903	102237654	1.24571	0.732391	0.32823	0.403253	0.989052	0.365742	1.39776
Tm6sf2	chr8	70074281	70075714	0.443905	0.447402	0.0729123	0.246339	0.445653	0.159625	1.3968
Krt36	chr11	100102007	100105626	1.35652	0.590769	0.346595	0.374067	0.973644	0.360331	1.39606
Olfr995	chr2	85438125	85439237	0.490227	0.240182	0.0469704	0.21159	0.365204	0.12928	1.39466
Cpa1	chr6	30655532	30656809	0.49809	0.251007	0.0818124	0.184272	0.374549	0.133042	1.39256
Sall4	chr2	168754915	168755943	0.618619	0.415662	0.203219	0.171647	0.517141	0.187433	1.39198
Gm6489	chr1	31286945	31287706	0.5967	0.420981	0.137213	0.231791	0.50884	0.184502	1.39026
BC048671	chr6	90302131	90305449	1.32885	0.451042	0.393779	0.266081	0.889945	0.32993	1.3901
Krtap3-2	chr11	99555823	99556853	0.529217	0.51857	0.152119	0.228419	0.523893	0.190269	1.39009
Cpa1	chr6	30640341	30641874	1.60059	0.941032	0.374876	0.5757	1.27081	0.475288	1.38997
Vmn1r178	chr7	23893529	23894443	0.596309	0.409018	0.171404	0.193033	0.502664	0.182218	1.38972
Entpd2	chr2	25395874	25401321	0.834591	0.215899	0.143938	0.237747	0.525245	0.190843	1.38967
Olfr836	chr9	19120957	19121911	0.523721	0.72779	0.273707	0.184947	0.625756	0.229327	1.38892
Fam133b	chr5	3473071	3473178	2.52603	1.48513	0.968113	0.545138	2.00558	0.756626	1.38814
Aym1	chr5	113357294	113357821	0.430573	0.202517	0	0.223011	0.316545	0.111506	1.38594
Atp1b2	chr11	69602144	69603162	3.21269	0.577144	0.564337	0.866657	1.89492	0.715497	1.38586
Synm	chr7	67725261	67726014	1.08546	0.709079	0.277337	0.390417	0.897267	0.333877	1.38525
Olfr1406	chr1	173183442	173184504	0.855476	0.704143	0.245899	0.332314	0.779809	0.289106	1.38431
BC048671	chr6	90301219	90305448	1.37588	0.455017	0.432561	0.250532	0.915449	0.341546	1.38234
Prlhr	chr19	60466733	60468304	0.491708	0.272084	0.199535	0.0749045	0.381896	0.13722	1.37898
Dcpp3	chr17	23917458	23919441	0.435435	0.188635	0.131749	0.0890246	0.312035	0.110387	1.37864
Lce3d	chr3	92957419	92958575	0.314389	0.646935	0.0451842	0.305315	0.480662	0.17525	1.37855
Usp6nl	chr2	6472272	6472903	1.22305	0.169192	0.330874	0.186313	0.696119	0.258594	1.37598
Vmn1r78	chr7	12152464	12153405	0.820557	0.454051	0.221988	0.25	0.637304	0.235994	1.37562
Gm5449	chr13	53525703	53526059	1.14627	0.898564	0.439312	0.329831	1.02241	0.384572	1.37503
Vmn1r6	chr6	57002300	57003357	0.816543	0.70747	0.345885	0.222589	0.762007	0.284237	1.37471
Gm9843	chr16	76403209	76403712	0.180431	0.742563	0.103726	0.233631	0.461497	0.168679	1.37208
Olfr1361	chr13	21658368	21659321	1.81112	0.952723	0.49319	0.555424	1.38192	0.524307	1.37198
Olfr95	chr17	37210894	37211867	1.54051	0.384242	0.483063	0.241786	0.962379	0.362424	1.37116
Olfr1509	chr14	52450393	52451402	1.26051	0.211741	0.258803	0.29146	0.736127	0.275131	1.37029
Olfr272	chr4	52910833	52911794	1.27614	0.722494	0.326059	0.428404	0.999319	0.377231	1.36919
Tspan32	chr7	143005060	143007488	0.823637	0.484241	0.17218	0.315098	0.653939	0.243639	1.36858
Rpl36-ps3	chr12	12911986	12912369	0.473631	0.278461	0.272282	0	0.376046	0.136141	1.36738
5430421N21Rik	chr15	101485131	101488068	0.649993	0.363952	0.213525	0.160313	0.506972	0.186919	1.36715
Serpinb6a	chr13	33935820	33936630	0.392453	0.197773	0.0644613	0.145191	0.295113	0.104826	1.3667
Gm11116	chr5	88154023	88154099	2.9525	6.94345	0	3.82305	4.94798	1.91152	1.36488
Casq2	chr3	102144051	102145585	1.33295	0.766267	0.374631	0.421905	1.04961	0.398268	1.36364
Fuom	chr7	140101155	140101966	0.279979	0.329215	0	0.217518	0.304597	0.108759	1.36359
Olfr1454	chr19	13063413	13064336	0.885751	1.62014	0.509202	0.446022	1.25294	0.477612	1.36267
Olfr641	chr7	104039798	104040736	1.21056	0.683253	0.278371	0.438897	0.946905	0.358634	1.36255
Bpifb9a	chr2	154267682	154271245	0.752706	0.390033	0.161352	0.264309	0.571369	0.212831	1.361
Tectb	chr19	55189630	55190324	1.43929	1.38469	0.827423	0.254136	1.41199	0.54078	1.35921
Gstp2	chr19	4040351	4042165	0.851752	0.441856	0.25923	0.227066	0.646804	0.243148	1.35558
Nnmt	chr9	48603277	48605077	0.934112	0.564035	0.174164	0.392282	0.749073	0.283223	1.35504
Olfr1490	chr19	13654446	13655396	1.62558	0.674632	0.384802	0.495267	1.15011	0.440035	1.35491
Olfr1480	chr19	13529675	13530622	0.719439	1.12794	0.330874	0.372626	0.923691	0.35175	1.35398
Gm8674	chr13	49804944	49805951	0.451077	0.424322	0.207453	0.116815	0.437699	0.162134	1.3497
Gm4778	chr3	94265687	94266784	0.869617	0.876468	0.238061	0.428961	0.873042	0.333511	1.34735
Olfr352	chr2	36869568	36870515	1.5348	0.338383	0.220583	0.496835	0.936593	0.358709	1.34648
Olfr768	chr10	129093034	129093972	1.06529	0.911004	0.445394	0.313498	0.988147	0.379446	1.34476
Tas2r143	chr6	42400238	42401119	1.80431	0.727409	0.711267	0.267006	1.26586	0.489137	1.34375
Myh6	chr14	54957072	54957907	0.978987	0.575575	0.312668	0.281698	0.777281	0.297183	1.34119
3100002H09Rik	chr4	124450235	124451285	1.55744	0.508702	0.348189	0.448144	1.03307	0.398167	1.3411
Speer4a	chr5	26032846	26039506	0.395913	0.240795	0.117726	0.114904	0.318354	0.116315	1.33813
Sgsh	chr11	119346418	119347861	0.409343	0.55538	0.0362037	0.326177	0.482361	0.18119	1.33809
S100a9	chr3	90692632	90695711	1.38768	0.468683	0.390388	0.324959	0.928179	0.357674	1.33753
S100a9	chr3	90692632	90695721	1.38319	0.467166	0.389125	0.323907	0.925176	0.356516	1.33741
1700122O11Rik	chr17	48036745	48038293	1.46767	0.862888	0.371245	0.532117	1.16528	0.451681	1.33695
Krtap27-1	chr16	88671046	88671654	1.19458	0.614535	0.600898	0.0966747	0.904555	0.348786	1.33568
Sec14l3	chr11	4071409	4076761	1.07025	0.519364	0.214855	0.395946	0.794806	0.3054	1.33523
Sfta2	chr17	35649708	35650571	0.947261	0.742563	0.242028	0.408854	0.844912	0.325441	1.33445
Doxl2	chr6	48975143	48978745	1.46388	0.712267	0.435288	0.408513	1.08807	0.421901	1.33433
Ifna4	chr4	88841816	88842459	0.917843	1.32831	0.324709	0.548524	1.12308	0.436616	1.33163
Phtf1	chr3	103996420	103997565	0.555462	0.466532	0.182472	0.205497	0.510997	0.193984	1.32768
1700036A12Rik	chr9	60769602	60769955	0.899095	1.5103	0.443035	0.49894	1.2047	0.470987	1.3258
Olfr410	chr11	74334282	74335229	1.24703	0.563972	0.330874	0.372626	0.9055	0.35175	1.32531
Slc5a2	chr7	128265657	128266717	0.857088	0.100781	0.19709	0.16647	0.478935	0.18178	1.32339
Serpina6	chr12	103654374	103657102	1.59948	0.862016	0.555539	0.409902	1.23075	0.482721	1.32186
Olfr930	chr9	38930173	38931099	1.03003	0.692098	0.22558	0.444579	0.861065	0.335079	1.32087
Rtp1	chr16	23429133	23433960	1.2243	0.730874	0.422296	0.341445	0.977586	0.381871	1.32032
Adam33	chr2	131062049	131063543	0.517033	0.393385	0.0699373	0.275669	0.455209	0.172803	1.31941
Pld4	chr12	112772434	112775254	0.83813	0.833903	0.296508	0.354794	0.836016	0.325651	1.31829
Olfr715	chr7	107128352	107129482	0.964849	0.567263	0.231115	0.364389	0.766056	0.297752	1.31756
Fzd2	chr11	102619796	102624416	1.03315	0.590065	0.237576	0.394963	0.811609	0.31627	1.3165
Itih4	chr14	30886476	30901981	1.0615	0.524095	0.340519	0.277175	0.792797	0.308847	1.31591
Olfr904	chr9	38464043	38464975	0.92594	0.28652	0.280161	0.189308	0.60623	0.234735	1.31102
Itih4	chr14	30886502	30901948	1.05967	0.526096	0.34182	0.278233	0.792882	0.310026	1.31073
Itih3	chr14	30911958	30914129	2.05153	0.959999	0.625797	0.569233	1.50576	0.597515	1.31046
Aldoart2	chr12	55565239	55566896	0.767864	0.45145	0.189185	0.284077	0.609657	0.236631	1.30801
Pax4	chr6	28444673	28447180	0.997117	0.405034	0.312668	0.234748	0.701076	0.273708	1.30722
Olfr1471	chr19	13445014	13445958	0.384919	0.226305	0.165962	0.0623015	0.305612	0.114132	1.30454
Psapl1	chr5	36204021	36206568	1.3562	0.503591	0.410346	0.323489	0.929897	0.366917	1.30437
Abca4	chr3	122112030	122112571	1.51002	0.591859	0.289362	0.543127	1.05094	0.416244	1.3033
Scgb1b2	chr7	31290520	31291816	1.40227	0.535882	0.403069	0.363145	0.969075	0.383107	1.30317
Itih4	chr14	30886521	30901846	1.05913	0.53025	0.344518	0.28043	0.794691	0.312474	1.30303
Itih4	chr14	30886502	30901844	1.05796	0.529663	0.344137	0.280119	0.793811	0.312128	1.30298
Krt6a	chr15	101689932	101694307	0.841625	0.720843	0.250878	0.363259	0.781234	0.307068	1.30281
4932431P20Rik	chr7	29536716	29538055	1.493	0.478787	0.429149	0.351492	0.985892	0.39032	1.30174
Olfr854	chr9	19566435	19567382	1.39091	0.676767	0.38602	0.43473	1.03384	0.410375	1.29966
Gzmb	chr14	56258856	56262260	1.1751	0.345439	0.18424	0.414977	0.760272	0.299609	1.29797
Gm6588	chr5	112449426	112451738	0.471788	0.416067	0.113009	0.229085	0.443927	0.171047	1.2972
Alox15	chr11	70344605	70345696	1.29077	1.41985	0.38299	0.700892	1.35531	0.541941	1.2971
3100002H09Rik	chr4	124331406	124332467	0.556583	0.654463	0.196904	0.277189	0.605523	0.237047	1.29578
Ly6d	chr15	74762056	74763567	0.932225	0.388962	0.207453	0.311508	0.660593	0.25948	1.29577
Gm5965	chr16	88777896	88778528	0.646472	0.0844622	0	0.279028	0.365467	0.139514	1.2934
Olfr1499	chr19	13814607	13815658	0.691537	0.254109	0.198776	0.167894	0.472823	0.183335	1.29324
Olfr1411	chr1	92596521	92597492	0.935566	0.82507	0.215136	0.484567	0.880318	0.349852	1.29226
Gm5356	chr8	89186943	89187560	1.17718	0.346049	0.507554	0.0952669	0.761614	0.301411	1.29213
Vmn1r62	chr7	5610411	5611313	0.956702	0.296039	0.231575	0.260797	0.62637	0.246186	1.29213
Pramel6	chr2	87506583	87509399	1.03301	0.645295	0.185581	0.480697	0.839152	0.333139	1.29186
Loxl4	chr19	42607609	42612772	1.24149	0.559079	0.28346	0.433239	0.900285	0.35835	1.29091
Lif	chr11	4285460	4286939	2.08909	1.26436	0.635815	0.716046	1.67673	0.675931	1.29038
Lce3a	chr3	92925291	92926230	1.25764	0.796281	0.44492	0.375797	1.02696	0.410359	1.29009
Psg28	chr7	18422538	18432055	0.573253	0.292095	0.186747	0.148455	0.432674	0.167601	1.28797
Baiap2	chr11	119960021	119960387	2.10617	2.33088	0.99713	0.802111	2.21853	0.89962	1.28691
Dennd3	chr15	73564862	73567077	1.55939	0.796178	0.495415	0.451658	1.17778	0.473537	1.2856
Olfr449	chr6	42837852	42838888	0.964617	0.618683	0.403303	0.227097	0.79165	0.3152	1.28536
Adamtsl4	chr3	95676750	95677151	0.678635	0.398989	0.130045	0.29291	0.538812	0.211478	1.2853
Prss51	chr14	64093696	64097666	1.32822	0.659724	0.500269	0.296524	0.99397	0.398397	1.28468
Spred2	chr11	19626761	19628061	0.594131	0.49314	0.200915	0.226268	0.543636	0.213592	1.28443
H2-M10.5	chr17	36772910	36776234	0.77946	0.450228	0.220118	0.265601	0.614844	0.24286	1.28423
Rpl7a-ps8	chr7	19953783	19954583	0.681176	0.200242	0.195798	0.147004	0.440709	0.171401	1.28392
Olfr1496	chr19	13780548	13781614	1.2784	0.75161	0.53895	0.27589	1.01501	0.40742	1.28334
Reg3b	chr6	78370885	78373466	0.598734	0.538373	0.242966	0.205219	0.568553	0.224092	1.28275
Krt35	chr11	100092193	100096225	0.777914	0.530271	0.285177	0.233573	0.654093	0.259375	1.28208
Krt35	chr11	100092195	100096241	0.775223	0.528436	0.28419	0.232765	0.65183	0.258478	1.28191
Trim47	chr11	116106209	116107083	0.727496	0.427716	0.119493	0.336428	0.577606	0.22796	1.28186
Vmn1r171	chr7	23631988	23633568	0.575187	0.405803	0.198399	0.186195	0.490495	0.192297	1.2807
Myo1g	chr11	6514503	6515500	1.64015	0.964291	0.523829	0.530936	1.30222	0.527382	1.27806
Pramel6	chr2	87506565	87509219	1.09604	0.664531	0.196904	0.510028	0.880286	0.353466	1.27779
Pramel6	chr2	87506565	87509228	1.09234	0.662286	0.196239	0.508304	0.877312	0.352272	1.27766
Olfr672	chr7	104995964	104996902	1.06529	0.398564	0.334045	0.250798	0.731927	0.292422	1.27711
Olfr1463	chr19	13234252	13235184	0.341136	0.401127	0.224129	0.0631028	0.371132	0.143616	1.27648
Olfr62	chr4	118665519	118666467	1.38945	1.12676	0.275438	0.744467	1.2581	0.509952	1.27594
Olfr463	chr11	87892987	87893922	0.680085	0.228481	0.167558	0.188702	0.454283	0.17813	1.27503
Olfr1243	chr2	89527491	89528408	0.59436	0.174721	0.170843	0.128268	0.38454	0.149556	1.27282
Olfr118	chr17	37672025	37672990	0.941377	0.60881	0.378827	0.243788	0.775094	0.311308	1.27228
Ptpru	chr4	131768458	131768921	1.46989	0.345676	0.225337	0.507542	0.907782	0.36644	1.27152
Cyp2d26	chr15	82777931	82782110	1.28356	0.601156	0.437735	0.323953	0.942359	0.380844	1.27121
9030619P08Rik	chr15	75449457	75451406	1.60889	0.493519	0.187665	0.66423	1.0512	0.425947	1.27119
Dysf	chr6	84210484	84211041	3.09642	2.97025	1.12426	1.37164	3.03334	1.24795	1.27031
Gm14189	chr11	99674007	99674159	2.37744	2.09665	0.683374	1.15441	2.23704	0.918892	1.26866
Acsbg1	chr9	54646183	54647217	1.58151	0.516566	0.454592	0.398188	1.04904	0.42639	1.26675
Olfr1111	chr2	87149720	87150659	0.483708	0.682526	0.278075	0.187899	0.583117	0.232987	1.26538
Olfr559	chr7	102723489	102724510	0.756326	0.366196	0.102305	0.345645	0.561261	0.223975	1.26488
Olfr469	chr7	107822523	107823467	0.481148	0.396034	0.221283	0.124603	0.438591	0.172943	1.26477
Spata20	chr11	94483086	94484412	0.959396	0.483478	0.315166	0.266202	0.721437	0.290684	1.26463
Olfr1428	chr19	12108600	12109544	2.5982	1.01837	1.05109	0.436111	1.80829	0.743602	1.26355
Olfr432	chr1	174050375	174051313	1.40425	0.51244	0.278371	0.501597	0.958343	0.389984	1.2621
Olfr117	chr17	37659378	37660331	0.619592	0.280213	0.109598	0.246855	0.449902	0.178226	1.26035
Gm5499	chr17	87078263	87080230	0.323455	0.271669	0.0796922	0.149581	0.297562	0.114636	1.26031
Olfr1380	chr11	49563923	49564860	0.387791	0.341991	0.222934	0.0627664	0.364891	0.14285	1.25929
Lrp3	chr7	35200027	35202959	1.13167	0.674459	0.374306	0.361319	0.903067	0.367813	1.25876
Vmn1r204	chr13	22556201	22557109	0.450183	0.352901	0.0575117	0.259076	0.401542	0.158294	1.25816
Gm12794	chr4	101940407	101943183	0.491198	0.269537	0.150603	0.148406	0.380367	0.149505	1.25758
Rnase1	chr14	51145002	51146767	1.1586	0.877957	0.532846	0.300042	1.01828	0.416444	1.25712
Olfr948	chr9	39318647	39319612	0.282413	0.442771	0.162354	0.121894	0.362592	0.142124	1.25707
Olfr640	chr7	104021372	104022316	1.20287	0.396034	0.276604	0.373809	0.799452	0.325206	1.25577
Olfr1461	chr19	13165016	13165954	0.532645	0.227751	0.111348	0.188099	0.380198	0.149724	1.25496
Dhrs3	chr4	144918879	144919972	1.20529	0.537578	0.334503	0.376713	0.871434	0.355608	1.25475
Scgb1b27	chr7	34021483	34022881	1.33253	0.30573	0.373682	0.294585	0.81913	0.334134	1.25288
Olfr186	chr16	59026923	59027927	0.361939	0.319191	0.208072	0.058582	0.340565	0.133327	1.25285
Klhdc7b	chr15	89386891	89388708	0.550224	0.0588169	0.172535	0.0647689	0.304521	0.118652	1.2478
Ptprd	chr4	76084371	76086516	0.402564	0.199309	0.0974429	0.137174	0.300936	0.117308	1.24592
Atp1b2	chr11	69600666	69602741	1.88357	0.798363	0.402914	0.708995	1.34097	0.555954	1.24559
Olfr1331	chr4	118868783	118869736	1.00088	0.392298	0.383592	0.185141	0.696589	0.284367	1.24476
Kif12	chr4	63167477	63170797	1.16375	0.724452	0.299092	0.478658	0.944103	0.388875	1.24453
Olfr1412	chr1	92588332	92589297	1.03552	0.885541	0.487063	0.304736	0.960528	0.395899	1.24421
Cdhr4	chr9	107995756	107996358	2.26212	1.68462	0.866967	0.781093	1.97337	0.82403	1.24322
Olfr1510	chr14	52409889	52410927	0.918998	0.154373	0.150947	0.283325	0.536686	0.217136	1.24321
Igkv4-71	chr6	69243158	69243445	0.157877	0.371282	0	0.204427	0.264579	0.102213	1.2429
Olfr1214	chr2	88987265	88988200	0.97155	0.342721	0.223411	0.314503	0.657136	0.268957	1.23834
Pax8	chr2	24442998	24445900	1.15903	0.681429	0.396183	0.365053	0.920231	0.380618	1.2378
Olfr945	chr9	39257720	39258682	0.472155	0.277594	0.0542867	0.244548	0.374874	0.149417	1.23744
Gm14188	chr11	99763933	99764100	2.97711	0	1.24472	0	1.48855	0.622358	1.23607
Kif12	chr4	63165634	63172046	0.957158	0.666952	0.285316	0.385583	0.812055	0.33545	1.23488
Foxq1	chr13	31325934	31327109	0.618619	0.681946	0.133363	0.40051	0.650283	0.266936	1.23373
Ly6g	chr15	75156693	75158739	0.999552	0.835792	0.332006	0.431423	0.917672	0.381715	1.22975
Gm5294	chr5	138807190	138809405	0.943841	0.241266	0.353868	0.132841	0.592554	0.243354	1.22822
Olfr551	chr7	102587741	102588819	1.64344	0.842352	0.387604	0.654772	1.2429	0.521188	1.22757
Tpp1	chr7	105756976	105757889	1.24367	0.409466	0.171591	0.515317	0.826567	0.343454	1.22735
Kif12	chr4	63167729	63171189	1.12982	0.772386	0.317203	0.476307	0.951101	0.396755	1.22695
Olfr142	chr2	90252069	90252986	0.54483	0.465922	0.284739	0.128268	0.505376	0.206503	1.22582
Tor2a	chr2	32760295	32761789	0.72993	0.429147	0.279749	0.196906	0.579538	0.238328	1.22515
Emp3	chr7	45908855	45909459	0.751546	0.353485	0.25923	0.194628	0.552515	0.226929	1.22417
Fzd2	chr11	102621318	102624366	1.08862	0.543588	0.274336	0.405501	0.816104	0.339919	1.2235
Gm4868	chr5	125847949	125848740	0.918556	0.47254	0.132015	0.446022	0.695548	0.289019	1.21999
Itih4	chr14	30899161	30901849	1.03145	0.377771	0.388829	0.197053	0.704613	0.292941	1.21984
Fam71a	chr1	191162584	191164817	1.13977	0.526509	0.327616	0.368957	0.833137	0.348286	1.21917
Tcirg1	chr19	3896400	3897230	1.14902	0.450363	0.314549	0.354241	0.799694	0.334395	1.21718
Lce3f	chr3	92992226	92993425	0.454685	0.222769	0.17426	0.0981249	0.338727	0.136193	1.21651
Apol6	chr15	77052751	77056044	0.980044	0.438234	0.269802	0.321721	0.709139	0.295761	1.2157
Krtap1-4	chr11	99583062	99583654	0.766754	0.811435	0.264476	0.397133	0.789095	0.330804	1.21308
Olfr1381	chr11	49551749	49552684	0.437197	0.285601	0.167558	0.125801	0.361399	0.14668	1.20976
Ambp	chr4	63152698	63154799	0.757088	0.279786	0.149224	0.28009	0.518437	0.214657	1.20922
Pax4	chr6	28443804	28446864	0.935811	0.401726	0.290339	0.269274	0.668769	0.279807	1.20857
Gm5117	chr8	31737054	31739763	0.486564	0.374844	0.115745	0.238976	0.430704	0.17736	1.20423
Cyp11b2	chr15	74851010	74856318	0.745105	0.614304	0.216636	0.354869	0.679704	0.285752	1.20264
Hist1h2ba	chr13	23933768	23934156	0.701314	0	0.134391	0.151349	0.350657	0.14287	1.20186
Olfr1242	chr2	89493294	89494346	0.56134	0.253868	0	0.33547	0.407604	0.167735	1.20098
Snx9	chr17	5816054	5816700	0.562207	0.247904	0.242402	0.0909968	0.405056	0.1667	1.20038
Tnni2	chr7	142442980	142443859	0.41335	0.364531	0.118814	0.20071	0.388941	0.159762	1.19974
1700093K21Rik	chr11	23518788	23519942	1.14163	0.786924	0.362099	0.458766	0.964279	0.410433	1.19907
Olfr653	chr7	104579624	104580669	1.13019	0.664473	0.199916	0.562858	0.897333	0.381387	1.19865
L3mbtl1	chr2	162948005	162949539	0.533181	0.243812	0.204344	0.115065	0.388497	0.159705	1.19859
L3mbtl1	chr2	162948005	162949539	0.533181	0.243812	0.204344	0.115065	0.388497	0.159705	1.19859
Krtap19-9b	chr16	88931804	88932264	0.887672	1.04378	0.567008	0.255423	0.965724	0.411215	1.19855
Mcpt2	chr14	56042123	56044634	1.26704	0.766212	0.374604	0.492187	1.01662	0.433396	1.19854
Olfr703	chr7	106844613	106845572	0.899898	0.612615	0.272282	0.367968	0.756256	0.320125	1.19777
H2-M10.1	chr17	36323201	36326145	1.00355	0.653557	0.284024	0.419821	0.828553	0.351922	1.19665
Krt32	chr11	100080848	100085440	1.36613	0.582022	0.523578	0.307642	0.974078	0.41561	1.19599
Vmn1r2	chr4	3172083	3173006	0.344459	0.347172	0.28289	0	0.345815	0.141445	1.19537
Olfr262	chr19	12240721	12241659	1.64636	0.740191	0.835114	0.188099	1.19327	0.511606	1.1951
Ceacam16	chr7	19852003	19858347	0.824095	0.353902	0.255417	0.241253	0.588999	0.248335	1.19147
Gm14177	chr11	99685387	99685539	1.78308	0.698883	0.683374	0.384803	1.24098	0.534089	1.19073
Cryaa	chr17	31677933	31681722	1.25968	0.465523	0.317255	0.419426	0.862602	0.36834	1.19068
Olfr1392	chr11	49293297	49294314	1.56326	0.840307	0.513537	0.520505	1.20178	0.517021	1.19044
Olfr968	chr9	39771772	39772798	0.575551	0.468531	0.152711	0.286635	0.522041	0.219673	1.18734
Olfr993	chr2	85413933	85414877	0.240574	0.622339	0.110642	0.249206	0.431456	0.179924	1.18713
Il1rn	chr2	24345288	24349807	1.37814	0.638736	0.346979	0.521017	1.00844	0.433998	1.18493
Olfr1306	chr2	111911990	111912928	0.484223	0.398564	0.0556742	0.313498	0.441394	0.184586	1.18492
Olfr464	chr11	87913920	87915003	1.88753	0.937109	0.626952	0.597439	1.41232	0.612195	1.18365
Gm5218	chr15	81499084	81499548	0.586691	0.574888	0.112426	0.379838	0.580789	0.246132	1.18361
Vsig10l	chr7	43456501	43457780	1.34985	0.584769	0.326738	0.505956	0.967308	0.416347	1.18344
Syt8	chr7	142438132	142438542	2.10195	0.65042	0.763184	0.429744	1.37619	0.596464	1.18323
Gm9844	chr7	24862213	24862697	0.281249	0.771653	0.32337	0.121392	0.526451	0.222381	1.18255
Cyp2d12	chr15	82555108	82559413	1.44663	0.571149	0.582756	0.287128	1.00889	0.434942	1.18251
Sun5	chr2	153842981	153844752	1.69352	0.844812	0.236019	0.863853	1.26917	0.549936	1.18169
Olfr1093	chr2	86785732	86786700	0.797693	0.8828	0.539506	0.182275	0.840247	0.360891	1.18154
Tnni3	chr7	4521899	4522442	2.50746	0.0982804	0.480497	0.649356	1.30287	0.564927	1.18135
Olfr747	chr14	50680691	50681645	0.285666	0.671806	0.218966	0.184947	0.478736	0.201957	1.17847
Dpcd	chr19	45578797	45579890	0.623426	0.244354	0.0955724	0.269081	0.43389	0.182327	1.17709
Opn1sw	chr6	29378931	29380413	0.981115	0.684981	0.282013	0.436699	0.833048	0.359356	1.17512
Ckap4	chr10	84488734	84492726	1.50309	0.736426	0.353496	0.61927	1.11976	0.486383	1.17495
Olfr282	chr15	98437470	98438397	2.25383	1.3827	0.957681	0.634428	1.81827	0.796054	1.17441
Olfr1494	chr19	13749108	13750055	1.19906	0.789561	0.551457	0.310522	0.994313	0.430989	1.17441
Olfr222	chr11	59570699	59571813	0.815579	0.431552	0.37509	0.158408	0.623566	0.266749	1.17428
Kif12	chr4	63165637	63172131	0.952074	0.658532	0.31391	0.380715	0.805303	0.347313	1.17413
Krt81	chr15	101459061	101463765	0.521849	0.329537	0.133334	0.225239	0.425693	0.179286	1.17263
Eno2	chr6	124762657	124763921	0.754814	0.464909	0.289286	0.232707	0.609861	0.260997	1.17257
Map4k2	chr19	6345350	6346293	0.626156	0.509726	0.110759	0.374205	0.567941	0.242482	1.1721
Chi3l7	chr3	106034662	106035056	0.805771	0.541413	0.13235	0.447151	0.673592	0.28975	1.17025
Olfr799	chr10	129647130	129648065	0.485775	0.342721	0.223411	0.125801	0.414248	0.174606	1.16953
Pramel6	chr2	87507425	87509312	1.27639	0.73627	0.221517	0.654859	1.00633	0.438188	1.16836
Lcn11	chr2	25777017	25780279	1.5328	0.770099	0.464623	0.541296	1.15145	0.502959	1.16779
Olfr1402	chr3	97410217	97411179	2.83293	1.22141	0.868587	0.917055	2.02717	0.892821	1.16767
Spag8	chr4	43647197	43648400	0.641998	0.754898	0.260522	0.342296	0.698448	0.301409	1.16741
Vmn1r70	chr7	10633587	10634483	1.21655	0.95366	0.815935	0.131271	1.0851	0.473603	1.16727
Lpar5	chr6	125062189	125063242	1.42359	1.01451	0.843195	0.223434	1.21905	0.533315	1.16708
Olfr994	chr2	85429883	85430827	0.769838	0.45261	0.276604	0.249206	0.611224	0.262905	1.16566
Morc2b	chr17	33135588	33139683	1.46529	0.978965	0.510528	0.560577	1.22213	0.535553	1.16479
Defb33	chr8	20900606	20901973	0.36561	0.234494	0.07643	0.172149	0.300052	0.124289	1.16466
Spata19	chr9	27396821	27401710	0.75316	0.371737	0.181744	0.300997	0.562448	0.24137	1.16447
Defb42	chr14	63055073	63056940	0.754563	0.629668	0.251875	0.346694	0.692116	0.299285	1.16416
Orc5	chr5	22775630	22778702	0.577049	0.695927	0.204145	0.344858	0.636488	0.274501	1.16396
Wfdc15a	chr2	164198863	164200130	1.14747	0.927618	0.535974	0.371451	1.03754	0.453712	1.16326
Olfr124	chr17	37805069	37806190	1.05364	0.333558	0.232968	0.367312	0.693598	0.30014	1.16326
Ttc25	chr11	100545710	100550210	0.727335	0.558284	0.162607	0.392412	0.642809	0.27751	1.16302
Bpifb4	chr2	153938212	153942601	1.18073	0.645472	0.488247	0.308456	0.913102	0.398351	1.16254
Entpd8	chr2	25081811	25085152	1.44215	0.815886	0.531854	0.458033	1.12902	0.494944	1.16215
Hdgfl1	chr13	26768172	26770165	0.889304	0.187689	0.314612	0.14763	0.538497	0.231121	1.16185
Bpifb6	chr2	153900388	153912795	1.42547	0.611861	0.455032	0.436532	1.01867	0.445782	1.16168
Olfr303	chr7	86394496	86395535	0.874395	0.771123	0.150802	0.566105	0.822759	0.358454	1.16074
Pld4	chr12	112772194	112777636	0.584751	0.540244	0.192093	0.292049	0.562497	0.242071	1.16058
Gpihbp1	chr15	75596658	75598212	1.52049	1.03147	0.403432	0.719372	1.27598	0.561402	1.16016
Rps24	chr14	24615118	24617304	0.395017	0.342251	0.0956161	0.215363	0.368634	0.15549	1.15936
Atp2b2	chr6	113937739	113940206	1.75021	0.996503	0.614289	0.596383	1.37335	0.605336	1.15931
Sox9	chr11	112825154	112826210	1.8067	0.556396	0.593507	0.4456	1.18155	0.519554	1.15905
Nsmf	chr2	25060829	25061709	0.567711	0.303431	0.237358	0.133655	0.435571	0.185506	1.159
Klhl40	chr9	121777607	121783819	0.958696	0.507711	0.353401	0.284283	0.733203	0.318842	1.15879
Olfr1133	chr2	87645180	87646121	0.434413	0.397295	0.166491	0.1875	0.415854	0.176995	1.15654
Gm14181	chr11	99756159	99756281	1.10899	0	0	0.478658	0.554494	0.239329	1.15572
Cdhr4	chr9	107995998	107997157	1.60708	0.783532	0.495741	0.558297	1.1953	0.527019	1.15554
Abp1	chr6	48907355	48908651	1.50744	1.23665	0.443376	0.771684	1.37204	0.60753	1.1528
Tbrg4	chr11	6617254	6618030	0.234072	0.275236	0.134564	0.0757721	0.254654	0.105168	1.15045
Lim2	chr7	43427686	43428832	0.991032	0.885638	0.364625	0.461965	0.938335	0.413295	1.14998
Hdac7	chr15	97857537	97859698	1.49318	0.568772	0.338526	0.571866	1.03098	0.455196	1.1495
Olfr313	chr11	58816928	58818001	0.719707	0.497808	0.146028	0.383729	0.608757	0.264878	1.14944
Tnni2	chr7	142443171	142444405	0.625883	0.519494	0.211652	0.286032	0.572688	0.248842	1.14819
Ubl4b	chr3	107553698	107555073	0.760012	0.271985	0.189964	0.256722	0.515999	0.223343	1.14771
Morc2b	chr17	33135643	33139499	1.52073	1.03963	0.542163	0.595313	1.28018	0.568738	1.14649
Gm8888	chr15	96766761	96767141	1.1934	0.140327	0.274426	0.309055	0.666863	0.29174	1.14625
Col1a1	chr11	94945368	94946029	1.03025	0.323049	0.23691	0.35574	0.676651	0.296325	1.14548
Ighg2c	chr12	113285325	113288930	0.895248	0.444797	0.260956	0.326539	0.670022	0.293747	1.14349
2310050C09Rik	chr3	92868359	92870205	0.935465	1.09997	0.424565	0.47814	1.01772	0.451352	1.14282
2310007L24Rik	chr11	106374826	106377096	1.30139	0.659184	0.299258	0.570343	0.980287	0.4348	1.14152
S100a2	chr3	90590247	90591508	1.22498	0.804934	0.621372	0.279912	1.01496	0.450642	1.14112
Uts2r	chr11	121160271	121161973	1.20146	0.973224	0.552558	0.414856	1.08734	0.483707	1.14041
C8g	chr2	25498658	25500243	0.602042	0.303393	0.131849	0.259851	0.452718	0.19585	1.1402
C8g	chr2	25498656	25500255	0.596774	0.300738	0.130695	0.257578	0.448756	0.194137	1.13961
Pkdcc	chr17	83220102	83221742	0.498741	0.456127	0.12743	0.28702	0.477434	0.207225	1.13913
C8g	chr2	25498651	25500613	0.532744	0.272361	0.106527	0.239939	0.402553	0.173233	1.13908
Rho	chr6	115931927	115938829	1.2449	0.526668	0.265064	0.520262	0.885785	0.392663	1.13901
Tnfaip3	chr10	19007267	19008845	1.26701	0.744915	0.297975	0.596579	1.00596	0.447277	1.13887
Kcnj11	chr7	46098725	46099897	1.12412	0.364635	0.356543	0.30115	0.744375	0.328847	1.13733
Slc25a2	chr18	37637378	37638723	1.01341	0.556095	0.388396	0.306185	0.784755	0.34729	1.13698
Bbs7	chr3	36620562	36621339	0.759757	0.206162	0.268782	0.151349	0.482959	0.210066	1.13695
Gm14184	chr11	99699537	99699674	1.64741	1.93712	0.757654	0.85326	1.79227	0.805457	1.13691
Rfpl4b	chr10	38820541	38821779	0.99084	0.733573	0.33755	0.427663	0.862206	0.382607	1.13662
Gm5082	chr13	41655697	41656524	1.70232	0.839419	0.56824	0.56884	1.27087	0.56854	1.13646
Ighe	chr12	113271180	113273246	0.945886	0.465584	0.480544	0.142416	0.705735	0.31148	1.13644
Dhrs2	chr14	55234654	55241248	1.33062	0.624226	0.531104	0.339234	0.977422	0.435169	1.1361
Olfr974	chr9	39942215	39943294	1.09461	0.742563	0.435651	0.381597	0.918588	0.408624	1.13533
Bbs7	chr3	36620562	36621361	0.738864	0.200492	0.261391	0.147187	0.469678	0.204289	1.13518
Acbd4	chr11	103103108	103104098	0.596459	0.0539501	0.158259	0.118819	0.325205	0.138539	1.13494
Lcn10	chr2	25679961	25681601	0.88665	0.423546	0.25486	0.322897	0.655098	0.288878	1.13435
Tff1	chr17	31161396	31165053	1.15598	0.862332	0.385869	0.515035	1.00916	0.450452	1.13345
Rnf186	chr4	138967112	138968365	1.2328	0.810069	0.583647	0.328648	1.02143	0.456148	1.13315
Lpar3	chr3	146192083	146195140	1.10028	0.751791	0.324815	0.500572	0.926038	0.412693	1.13302
Olfr1109	chr2	87092457	87093395	0.484223	0.626315	0.111348	0.376198	0.555269	0.243773	1.13224
Ldoc1l	chr15	84553398	84557823	0.493107	0.33823	0.200797	0.159625	0.415668	0.180211	1.1313
Ivl	chr3	92570912	92573715	0.40539	0.438547	0.0932206	0.272958	0.421968	0.183089	1.13128
Ttn	chr2	76888751	76889507	1.14122	0.565015	0.138119	0.622192	0.853117	0.380156	1.13038
Krtap29-1	chr11	99978025	99979053	1.14886	0.519578	0.457243	0.286078	0.834221	0.371661	1.12987
Itga2b	chr11	102461212	102461937	1.50309	0.883712	0.504059	0.567665	1.1934	0.535862	1.12968
Pcdhb6	chr18	37333946	37336398	1.09362	0.784641	0.575422	0.264013	0.939129	0.419717	1.12947
Ccl22	chr8	94745680	94749873	1.1275	0.458923	0.299159	0.407099	0.793211	0.353129	1.12904
Vmn1r84	chr7	12361808	12362764	1.18779	1.0056	0.491644	0.492162	1.0967	0.491903	1.129
Alpi	chr1	87098002	87101606	0.756758	0.355936	0.130514	0.359292	0.556347	0.244903	1.12863
Tnnt3	chr7	142492750	142496971	1.20618	0.683819	0.371469	0.474123	0.944998	0.422796	1.12815
Slc34a2	chr5	53047687	53049187	0.242337	0.284954	0.104487	0.117671	0.263646	0.111079	1.12811
Ces2a	chr8	104739607	104741244	1.05483	0.913924	0.414906	0.467261	0.984375	0.441083	1.12728
Tmprss5	chr9	49102728	49106699	0.995912	0.75378	0.381688	0.400207	0.874846	0.390948	1.12726
Entpd8	chr2	25081806	25084008	1.71307	0.94649	0.664452	0.534498	1.32978	0.599475	1.12663
Il1b	chr2	129365122	129367351	1.10103	0.623354	0.37509	0.39602	0.862193	0.385555	1.12581
Olfr1157	chr2	87961952	87962890	0.774757	0.284689	0.278371	0.188099	0.529723	0.233235	1.12561
Trim40	chr17	36889265	36890112	0.428948	0.756574	0.246595	0.277712	0.592761	0.262153	1.12546
Tas2r118	chr6	23969161	23970060	1.66718	1.60394	0.697041	0.784999	1.63556	0.74102	1.12374
Nt5dc2	chr14	31142384	31142997	0.592424	0.261227	0.0851435	0.287662	0.426826	0.186403	1.12321
Olfr457	chr6	42471162	42472200	0.743951	0.257289	0.100632	0.33999	0.50062	0.220311	1.12301
Gm5460	chr14	34041078	34046981	1.55566	0.914621	0.5667	0.548462	1.23514	0.557581	1.12295
Gm5356	chr8	89146747	89147247	2.17813	0.960441	0.83478	0.587574	1.56929	0.711177	1.1226
Myo1g	chr11	6517998	6520965	1.44004	0.702533	0.369892	0.595097	1.07129	0.482495	1.12251
Mrgprb5	chr7	48167983	48169014	0.616821	0.362647	0.202628	0.228197	0.489734	0.215413	1.12237
Slc2a6	chr2	27024068	27025991	1.20525	0.611341	0.326059	0.489604	0.908294	0.407832	1.12183
Cyp2a12	chr7	27029090	27036807	0.936706	0.741216	0.379318	0.373785	0.838961	0.376551	1.11966
Vmn1r225	chr17	20502299	20503195	0.963102	0.298019	0.233124	0.328177	0.63056	0.280651	1.11963
Vldlr	chr19	27238774	27243828	1.09736	0.560558	0.465384	0.279525	0.82896	0.372454	1.11775
Vmn1r192	chr13	22187075	22188140	0.25592	0.250772	0.0490414	0.165689	0.253346	0.107365	1.11579
Defb14	chr8	19194357	19195212	2.1247	1.0618	0.48858	0.962908	1.59325	0.725744	1.1156
Gm5900	chr7	104949176	104950441	0.466896	0.38008	0	0.372037	0.423488	0.186019	1.11473
Gm7589	chr9	59145674	59146210	0.677371	0.497808	0.194704	0.32891	0.587589	0.261807	1.11468
Gm5428	chr10	111125851	111126738	0.358423	0.240831	0.0588717	0.198902	0.299627	0.128887	1.11407
Dnajb8	chr6	88222268	88223256	1.793	0.64871	0.634315	0.476238	1.22085	0.555276	1.11204
Ecm1	chr3	95734149	95735018	0.78394	0.798896	0.240359	0.473706	0.791418	0.357033	1.11035
Entpd8	chr2	25081818	25085716	1.35274	0.767893	0.496099	0.4681	1.06032	0.4821	1.10884
Olfr850	chr9	19477301	19478248	0.863327	0.902355	0.551457	0.248417	0.882841	0.399937	1.10838
Vsig10l	chr7	43457036	43457783	2.00596	0.786243	0.489234	0.787098	1.3961	0.638166	1.108
Entpd8	chr2	25080509	25085715	1.19631	0.657141	0.411639	0.429661	0.926726	0.42065	1.10718
Olfr177	chr16	58872219	58873148	0.5378	0.517399	0.281065	0.189919	0.527599	0.235492	1.1065
Akp3	chr1	87125008	87127912	1.12693	0.662556	0.467894	0.344535	0.894743	0.406214	1.10576
Myo1g	chr11	6512964	6520958	1.24548	0.588478	0.39887	0.434474	0.916979	0.416672	1.10533
Olfr1505	chr19	13918942	13920044	0.94812	0.290832	0.236981	0.320262	0.619476	0.278622	1.10419
Lcn10	chr2	25680113	25681601	0.977161	0.430876	0.280876	0.355859	0.704019	0.318368	1.10235
Serpina9	chr12	104008276	104013755	1.05374	0.390252	0.352973	0.300821	0.721997	0.326897	1.10168
Krtap6-3	chr16	89084091	89084534	0.512033	0.602078	0.235487	0.265202	0.557056	0.250345	1.09999
Cct8l1	chr5	25516067	25518021	1.11636	0.79308	0.481333	0.391496	0.954722	0.436414	1.09821
Dirc2	chr16	35658095	35658487	0.694176	0.272084	0.133023	0.299618	0.48313	0.216321	1.09703
Bpifb6	chr2	153900395	153906922	1.52537	0.515972	0.448464	0.487017	1.02067	0.46774	1.09663
Krt32	chr11	100080857	100088226	1.30791	0.602111	0.475256	0.399423	0.955013	0.437339	1.09566
Serpinf1	chr11	75422731	75423340	0.969001	0.26294	0.171404	0.386065	0.615971	0.278734	1.09546
Tcl1	chr12	105217308	105222706	1.30536	0.564453	0.387317	0.468906	0.934905	0.428111	1.09506
Mia	chr7	27179744	27181127	0.427089	0.540826	0.264412	0.170159	0.483958	0.217286	1.09335
4933411K16Rik	chr19	42052228	42053628	0.908721	0.496102	0.261204	0.378211	0.702412	0.319708	1.09318
Olfr54	chr11	51027004	51027945	0.820557	0.227026	0.221988	0.25	0.523792	0.235994	1.09312
Gm14183	chr11	99704995	99705147	0.89154	0.698883	0.341687	0.384803	0.795211	0.363245	1.09303
Dgat1	chr15	76503591	76504322	0.745386	0.438234	0.214255	0.321721	0.59181	0.267988	1.09255
Cdhr4	chr9	107995726	107996574	1.76733	1.1965	0.677337	0.693462	1.48191	0.6854	1.09252
Mia	chr7	27179742	27181149	0.419809	0.531608	0.259905	0.167258	0.475708	0.213582	1.0923
Krtap9-5	chr11	99948475	99949551	0.422178	0.148926	0.194162	0.0546657	0.285552	0.124414	1.09212
Mia	chr7	27179744	27181157	0.418027	0.529352	0.258803	0.166549	0.47369	0.212676	1.09204
Tcl1	chr12	105217594	105222696	1.30088	0.555285	0.37905	0.47303	0.928084	0.42604	1.09135
Obp2b	chr2	25737009	25740097	1.47195	1.00387	0.609263	0.533667	1.23791	0.571465	1.09131
Tcl1	chr12	105217498	105222793	1.27923	0.55524	0.375107	0.466908	0.917236	0.421008	1.09115
Fam213a	chr14	41004041	41006920	0.473631	0.519794	0.181521	0.265755	0.496712	0.223638	1.09104
Dirc2	chr16	35662471	35663454	1.47865	0.869342	0.425025	0.658155	1.174	0.54159	1.09099
Klk14	chr7	43690418	43695536	1.35011	0.898213	0.531053	0.506055	1.12416	0.518554	1.09001
Alox5ap	chr5	149265058	149265182	1.81874	0	0.83645	0	0.909371	0.418225	1.08809
Svs1	chr6	48986861	48991725	1.31779	0.60443	0.558779	0.326747	0.961111	0.442763	1.08745
Pax8	chr2	24421394	24423082	1.1845	1.10791	0.43333	0.627441	1.1462	0.530385	1.08606
C8g	chr2	25498656	25500235	0.604329	0.270707	0.13235	0.260838	0.437518	0.196594	1.08584
Art5	chr7	102097114	102099493	1.01253	0.426818	0.263587	0.395798	0.719676	0.329692	1.08512
Gm9848	chr13	113108073	113108334	1.90898	0.408126	0.39907	0.67414	1.15856	0.536605	1.085
Adam8	chr7	139987654	139988430	1.98961	1.03213	0.269128	1.13658	1.51087	0.702855	1.08466
Anp32a	chr9	62425583	62428001	1.18417	0.397835	0.410618	0.316401	0.791004	0.363509	1.08436
Dhrs7c	chr11	67798271	67801178	1.34467	0.625101	0.485388	0.425163	0.984885	0.455275	1.08333
Vmn1r31	chr6	58471898	58472930	0.396144	0.207026	0.151824	0.113988	0.301585	0.132906	1.08227
Ubqlnl	chr7	104148259	104150556	0.850804	0.604908	0.181995	0.486781	0.727856	0.334388	1.0816
Gp49a	chr10	51480678	51485748	0.251059	0.253037	0.103092	0.116101	0.252048	0.109597	1.08123
Entpd8	chr2	25080325	25085716	1.1637	0.634594	0.416906	0.41492	0.899146	0.415913	1.0796
Entpd8	chr2	25080322	25085716	1.16305	0.634241	0.416674	0.414689	0.898646	0.415682	1.07958
Olfr555	chr7	102658823	102659770	0.527588	0.620369	0.275728	0.248417	0.573979	0.262073	1.07952
Olfr1378	chr11	50969020	50969967	1.19906	0.225589	0.220583	0.43473	0.712327	0.327657	1.07901
S100a10	chr3	93651571	93652663	0.332798	0.440239	0.23915	0.107731	0.386518	0.17344	1.07895
Rpl10l	chr12	66283381	66284401	0.1336	0.366554	0.102406	0.115328	0.250077	0.108867	1.07878
Cyp8b1	chr9	121914356	121916305	0.932688	0.658025	0.402139	0.332115	0.795357	0.367127	1.07836
Guca2b	chr4	119656607	119658954	1.14252	0.273243	0.400769	0.250745	0.707883	0.325757	1.07813
Capn3	chr2	120484351	120484625	2.64544	2.91625	1.33072	1.28454	2.78085	1.30763	1.0781
Serpina1f	chr12	103728156	103738158	0.331821	0.203104	0.0992986	0.135372	0.267463	0.117335	1.07609
Speer4b	chr5	27497537	27501362	0.332755	0.13974	0.0819834	0.123105	0.236247	0.102544	1.0759
Pdia2	chr17	26195999	26199087	1.0598	0.519241	0.406175	0.324012	0.789523	0.365094	1.07556
Htra1	chr7	130982730	130985396	0.988817	0.441027	0.196018	0.463582	0.714922	0.3298	1.07512
Rps24	chr14	24617568	24621693	1.30036	0.453529	0.443464	0.371	0.876944	0.407232	1.07328
Olfr1370	chr13	21072349	21073299	2.58181	1.85524	1.09943	0.990535	2.21852	1.04498	1.07303
Habp2	chr19	56312948	56319629	0.986671	0.728116	0.375539	0.422927	0.857394	0.399233	1.06872
4931431F19Rik	chr7	104127913	104129823	0.999308	0.195841	0.273564	0.277276	0.597575	0.27542	1.06844
Nsmf	chr2	25060136	25061107	1.30979	0.550047	0.322704	0.545138	0.92992	0.433921	1.06835
Gm11939	chr11	99559167	99559466	2.12186	1.06929	0.522781	0.981249	1.59558	0.752015	1.06709
Tdg	chr10	82651561	82652980	0.608382	0.753022	0.257709	0.373151	0.680702	0.31543	1.06679
Olfr740	chr14	50453054	50453989	0.728662	0.0571202	0.167558	0.188702	0.392891	0.17813	1.06607
Fbxw5	chr2	25502558	25503584	0.796917	0.468531	0.356326	0.229308	0.632724	0.292817	1.06541
Olfr1462	chr19	13190669	13191592	1.181	0.694345	0.622358	0.25487	0.937673	0.438614	1.06515
Erv3	chr2	131853678	131859747	0.876412	0.607752	0.292826	0.397672	0.742082	0.345249	1.06469
Gad1-ps	chr10	99443730	99447007	0.818378	0.489303	0.318963	0.28737	0.653841	0.303167	1.06421
Acox3	chr5	35606959	35609919	0.859925	0.541687	0.353111	0.298252	0.700806	0.325682	1.06398
Myo7a	chr7	98062643	98065202	1.20776	0.689192	0.612634	0.275976	0.948475	0.444305	1.06347
Icos	chr1	61306636	61307746	0.532035	0.577475	0.141165	0.370949	0.554755	0.256057	1.06271
3110018I06Rik	chr12	107729361	107735496	0.985547	0.313677	0.391915	0.21109	0.649612	0.301503	1.06255
Krt4	chr15	101918536	101924735	1.66473	0.991681	0.607101	0.645725	1.32821	0.626413	1.06253
Kcnj12	chr11	61065804	61071127	1.1444	0.482025	0.461508	0.298577	0.813212	0.380043	1.06177
Kcnj12	chr11	61065804	61071131	1.14354	0.481663	0.461162	0.298353	0.812601	0.379757	1.06175
Olfr1262	chr2	90002408	90003322	0.596309	0.233725	0.0571345	0.321721	0.415017	0.189428	1.06078
Dhrs7c	chr11	67798187	67800810	1.40356	0.611256	0.498077	0.448742	1.00741	0.473409	1.06077
Dhrs7c	chr11	67798276	67801339	1.32072	0.628174	0.511861	0.403516	0.974449	0.457689	1.06052
Kcnt1	chr2	25908063	25916923	0.928767	0.543032	0.401186	0.285704	0.7359	0.343445	1.05998
Fbxo48	chr11	16905185	16910809	1.02658	0.418212	0.297404	0.376799	0.722395	0.337102	1.05942
Atp1b2	chr11	69599736	69605829	1.15649	0.403572	0.265937	0.463734	0.780029	0.364836	1.05912
Tex19.2	chr11	121116215	121118677	0.812268	0.282192	0.339606	0.167326	0.54723	0.253466	1.05716
1600015I10Rik	chr6	48929895	48933687	1.57036	1.01488	0.509963	0.714012	1.29262	0.611987	1.05646
Olfr1265	chr2	90036921	90037850	0.880036	0.402421	0.281065	0.316532	0.641229	0.298798	1.05642
Ubqln3	chr7	104140623	104143279	0.787186	0.623787	0.216432	0.443168	0.705486	0.3298	1.05598
Dbh	chr2	27189197	27192260	1.02393	1.04696	0.477737	0.499591	1.03544	0.488664	1.0555
Olfr1511	chr14	52389815	52390771	0.570138	0.335201	0.109254	0.307601	0.45267	0.208428	1.05449
Uba7	chr9	107976891	107977524	2.36666	0.927618	0.824576	0.742901	1.64714	0.783739	1.0541
Scn2a1	chr2	65682280	65683866	0.372458	0.539025	0.197649	0.222589	0.455742	0.210119	1.05309
Gm757	chr2	25234476	25236787	1.14065	0.647495	0.384398	0.458369	0.894071	0.421383	1.05303
Il1rn	chr2	24345348	24346354	0.812744	0.37165	0.259574	0.292328	0.592197	0.275951	1.05274
Tctex1d1	chr4	102921295	102928739	0.836694	0.825846	0.315986	0.466571	0.83127	0.391278	1.05245
Olfr50	chr2	36793238	36794176	0.677912	0.227751	0.167023	0.250798	0.452832	0.208911	1.05182
Krt19	chr11	100140907	100143699	0.651178	0.421131	0.224611	0.274033	0.536155	0.249322	1.0506
Olfr139	chr11	74044325	74045272	1.5348	0.789561	0.606603	0.496835	1.16218	0.551719	1.05016
Krt86	chr15	101473478	101479983	0.775747	0.501282	0.281238	0.316726	0.638514	0.298982	1.04945
Apip	chr2	103178171	103182894	1.001	0.667741	0.376261	0.411277	0.834371	0.393769	1.04889
Speer3	chr5	13791619	13796820	0.183552	0.308331	0.0602977	0.158448	0.245942	0.109373	1.04869
Chmp4b	chr2	154722352	154723651	1.0143	0.616899	0.361925	0.407596	0.815598	0.38476	1.04865
Ceacam12	chr7	18065929	18071813	1.08939	0.617772	0.506347	0.300127	0.853581	0.403237	1.04825
Alox5	chr6	116410276	116412792	0.975487	0.637241	0.45694	0.304082	0.806364	0.380511	1.04786
Cdhr4	chr9	107995783	107996930	1.54466	0.884866	0.592	0.564133	1.21476	0.578066	1.04781
Gimap8	chr6	48627935	48633689	0.876978	0.594567	0.34519	0.347828	0.735772	0.346509	1.04728
Arsa	chr15	89473240	89474271	1.63017	0.569874	0.303943	0.741641	1.10002	0.522792	1.0472
Lgals4	chr7	28830151	28832247	0.65048	0.509915	0.14958	0.393061	0.580197	0.27132	1.04681
Olfr543	chr7	102476773	102477902	1.04618	0.283883	0.416374	0.208407	0.665031	0.312391	1.04678
Zfp462	chr4	54651903	54656077	0.544533	0.448206	0.250434	0.211527	0.49637	0.23098	1.0454
Obscn	chr11	59073107	59079710	0.81243	0.51813	0.269148	0.356602	0.66528	0.312875	1.04515
Rnase12	chr14	51056698	51057242	1.83543	1.6677	0.383693	1.29633	1.75156	0.840011	1.04391
Nt5dc2	chr14	31141633	31143192	1.19501	0.719715	0.268093	0.641586	0.957361	0.454839	1.04384
Vmn1r81	chr7	12259759	12260679	0.394949	0.522455	0.170287	0.2557	0.458702	0.212993	1.0437
Prop1	chr11	50950806	50953632	1.22236	0.832133	0.499296	0.478997	1.02725	0.489146	1.04265
1700110M21Rik	chr14	101197691	101200069	0.840948	0.449471	0.285673	0.321721	0.645209	0.303697	1.04263
Atp1b2	chr11	69599741	69605942	1.13635	0.396545	0.269735	0.455659	0.766446	0.362697	1.04206
Apom	chr17	35128997	35132050	0.65508	0.43766	0.222533	0.28917	0.54637	0.255851	1.0419
Mrpl23	chr7	142575558	142578120	0.851537	0.438063	0.101986	0.505364	0.6448	0.303675	1.04182
BC048679	chr7	81494275	81498281	0.87374	0.680482	0.339214	0.396711	0.777111	0.367963	1.04173
BC048679	chr7	81494275	81498281	0.87374	0.680482	0.339214	0.396711	0.777111	0.367963	1.04173
Sh2d7	chr9	54538988	54543654	1.08142	0.584249	0.436864	0.353224	0.832837	0.395044	1.04169
Mrpl23	chr7	142575529	142578143	0.834604	0.429352	0.0999581	0.495315	0.631978	0.297636	1.04093
Dynlrb2	chr8	116562044	116563504	0.466823	0.658701	0.286259	0.241786	0.562762	0.264023	1.04079
Tmem92	chr11	94777764	94782500	0.604711	0.541756	0.165542	0.372862	0.573234	0.269202	1.04033
Tmem92	chr11	94777764	94782500	0.604711	0.541756	0.165542	0.372862	0.573234	0.269202	1.04033
C030005K15Rik	chr10	97724874	97726755	0.507353	0.624984	0.250002	0.281549	0.566169	0.265775	1.04029
Itih1	chr14	30929180	30943277	1.22879	0.701585	0.522855	0.396731	0.965188	0.459793	1.04028
Itih1	chr14	30929180	30943289	1.22775	0.700988	0.522411	0.396394	0.964368	0.459402	1.04025
Adamtsl2	chr2	27104663	27108981	0.779039	0.371368	0.254189	0.286264	0.575203	0.270226	1.03999
V1ra8	chr6	90202793	90203682	0.357618	0.300363	0.234958	0.0661516	0.32899	0.150555	1.03936
Olfr907	chr9	38498671	38499603	0.633538	0.859559	0.392226	0.315514	0.746548	0.35387	1.03874
Slc22a12	chr19	6537737	6542711	1.07845	0.558825	0.39931	0.378693	0.818638	0.389002	1.03859
Sprr2g	chr3	92373915	92375229	1.07188	0.650519	0.238531	0.582033	0.8612	0.410282	1.03666
Mefv	chr16	3707215	3718124	0.946045	0.744877	0.416883	0.388542	0.845461	0.402713	1.03631
Mefv	chr16	3707215	3718124	0.946045	0.744877	0.416883	0.388542	0.845461	0.402713	1.03631
Ceacam12	chr7	18065929	18077986	0.961559	0.625187	0.476911	0.278311	0.793373	0.377611	1.03521
Dgcr6	chr16	18069480	18071343	0.463467	0.200779	0.0841386	0.221097	0.332123	0.152618	1.03457
Tcl1	chr12	105218290	105222625	1.21641	0.604189	0.421987	0.448079	0.910299	0.435033	1.03401
Olfr677	chr7	105056248	105057186	0.581067	0.398564	0.334045	0.125399	0.489816	0.229722	1.03382
Pdia2	chr17	26196025	26199062	1.04766	0.510359	0.412994	0.329451	0.779011	0.371223	1.03286
Casr	chr16	36603897	36604519	0.510882	0.42909	0.25174	0.189005	0.469986	0.220373	1.03172
Bzrap1	chr11	87755577	87757270	0.993114	0.536539	0.277747	0.451815	0.764827	0.364781	1.03097
Ms4a6c	chr19	11459266	11463288	1.0511	0.651196	0.506797	0.307326	0.851148	0.407062	1.03084
Ppp1r3d	chr2	178411206	178414472	0.292268	0.343666	0.112013	0.180211	0.317967	0.146112	1.03082
Nlrp1b	chr11	71429828	71436180	0.715702	0.395535	0.246867	0.278018	0.555618	0.262442	1.03074
Slc11a1	chr1	74375572	74376890	1.17205	0.648547	0.515251	0.357088	0.910297	0.436169	1.03033
Bpifa1	chr2	154142899	154145129	0.917115	0.76686	0.515517	0.290284	0.841988	0.402901	1.02972
Oog3	chr4	144157557	144162663	0.658835	0.586257	0.245677	0.345848	0.622546	0.295763	1.02808
Crp	chr1	172698056	172699966	1.11827	0.755386	0.437703	0.462127	0.93683	0.449915	1.02796
Dnahc2	chr11	69516007	69516755	0.607056	0.214144	0.0697972	0.314419	0.4106	0.192108	1.02612
Klhl30	chr1	91351016	91362416	1.05685	0.562735	0.394344	0.382137	0.809793	0.388241	1.02569
Sult5a1	chr8	123157271	123158315	0.609148	0.665109	0.100054	0.507057	0.637129	0.303555	1.02513
C1s	chr6	124540939	124542309	0.530632	0.662945	0.26692	0.300601	0.596788	0.28376	1.02499
Habp2	chr19	56311814	56316417	1.01722	0.836109	0.431487	0.46036	0.926662	0.445924	1.02481
Olfr213	chr6	116540455	116541438	0.508286	0.652007	0.371897	0.179497	0.580147	0.275697	1.02442
Pax4	chr6	28442375	28447180	0.860931	0.467231	0.315453	0.318508	0.664081	0.31698	1.02433
Olfr746	chr14	50653239	50654183	0.866067	0.226305	0.331925	0.186905	0.546186	0.259415	1.0222
Gja10	chr4	32501505	32502626	0.648393	0.762418	0.465937	0.209893	0.705405	0.337915	1.02176
Guca2b	chr4	119656607	119658781	1.17068	0.294977	0.432646	0.270689	0.73283	0.351668	1.02078
Kcna10	chr3	107183144	107187376	0.955988	0.543108	0.247003	0.472891	0.749548	0.359947	1.02063
Olfr48	chr2	89844066	89844971	0.401488	0.35407	0.288511	0.0649834	0.377779	0.176747	1.02027
Bcas1	chr2	170386971	170388003	1.3645	1.1904	0.556688	0.683929	1.27745	0.620309	1.02026
Tcl1	chr12	105216750	105222737	1.27567	0.633932	0.401602	0.521104	0.954801	0.461353	1.0199
C8g	chr2	25498897	25500114	0.634618	0.351163	0.128764	0.338362	0.492891	0.233563	1.0199
Olfr1054	chr2	86332416	86333354	0.62949	0.227751	0.278371	0.125399	0.42862	0.201885	1.01978
Gpr133	chr5	129096757	129100503	0.776618	0.542208	0.223232	0.408526	0.659413	0.315879	1.01903
Tnip3	chr6	65590428	65591661	0.442157	0.519915	0.169459	0.286264	0.481036	0.227861	1.01902
Ankrd24	chr10	81628579	81629747	0.544533	0.503088	0.0447204	0.453271	0.523811	0.248996	1.01887
H2-M11	chr17	36547075	36549250	0.9194	0.786243	0.552572	0.270565	0.852822	0.411568	1.01817
Gigyf2	chr1	87309226	87309742	3.42993	1.65461	1.01118	1.48041	2.54227	1.2458	1.01808
Kcnj1	chr9	32393985	32399192	1.16989	1.05738	0.391484	0.689587	1.11364	0.540535	1.01767
Gm10663	chr8	65075033	65077480	0.705802	0.873604	0.256265	0.505054	0.789703	0.38066	1.01722
Gm12789	chr4	101988116	101990014	0.670415	0.197078	0.192705	0.217022	0.433747	0.204863	1.01676
Olfr774	chr10	129238151	129239089	0.387378	0.284689	0	0.313498	0.336034	0.156749	1.01521
Spry1	chr3	37613913	37615276	0.56669	0.352772	0.306616	0.12949	0.459731	0.218053	1.01455
Tcl1	chr12	105216758	105222716	1.27425	0.637017	0.403556	0.52364	0.955632	0.463598	1.0143
Gas1	chr13	60211933	60212934	0.952933	0.693652	0.208695	0.587574	0.823293	0.398135	1.01411
Olfr934	chr9	38982110	38983042	0.92594	0.343823	0.168097	0.44172	0.634882	0.304908	1.01383
Gm5424	chr10	62071015	62072609	0.342083	0.201121	0.0655525	0.184561	0.271602	0.125057	1.01323
Gimap8	chr6	48626764	48633685	0.775106	0.525222	0.302098	0.323208	0.650164	0.312653	1.01304
Tas2r119	chr15	32177289	32178296	1.35323	1.59121	0.622358	0.817707	1.47222	0.720033	1.01294
Gm9507	chr10	77811190	77811843	0.417142	0.327	0.0799359	0.270068	0.372071	0.175002	1.01191
St6galnac2	chr11	116684916	116685917	1.04369	0.533578	0.469564	0.293787	0.788634	0.381675	1.01152
1700093K21Rik	chr11	23518817	23521155	1.04972	0.617162	0.379961	0.427907	0.833442	0.403934	1.01141
Krt17	chr11	100256217	100261029	1.25645	0.61096	0.46706	0.440369	0.933707	0.453715	1.01128
Cpa1	chr6	30639218	30645363	1.11711	0.695927	0.382772	0.498128	0.906517	0.44045	1.01056
Bmp10	chr6	87429002	87434512	1.13857	0.766413	0.445849	0.480742	0.952491	0.463295	1.01048
Olfr1489	chr19	13633113	13634054	1.73765	1.36215	0.832454	0.687499	1.5499	0.759977	1.01022
Lrtm2	chr6	119323649	119329204	0.720164	0.317554	0.263461	0.233126	0.518859	0.248293	1.00911
Olfr1013	chr2	85769803	85770720	0.54483	0.640643	0.0569478	0.513071	0.592736	0.28501	1.00906
Olfr714	chr7	107073830	107074783	0.762575	0.392298	0.49319	0.0617138	0.577436	0.277452	1.00884
Mcpt8	chr14	56082166	56085216	1.0432	0.753516	0.411234	0.463126	0.898357	0.43718	1.00804
Evc	chr5	37314565	37318372	0.859699	0.435242	0.315755	0.309217	0.64747	0.312486	1.0078
Traf7	chr17	24510062	24510511	0.505206	0	0.232347	0	0.252603	0.116174	1.00716
Slc11a1	chr1	74375225	74386051	0.886105	0.607383	0.337995	0.386083	0.746744	0.362039	1.00709
Slc11a1	chr1	74375203	74386052	0.884227	0.606096	0.337278	0.385264	0.745161	0.361271	1.00701
Slc11a1	chr1	74375203	74386062	0.883412	0.605538	0.336968	0.38491	0.744475	0.360939	1.00698
Niacr1	chr5	123863570	123865516	0.794006	0.768879	0.214805	0.544298	0.781443	0.379551	1.00617
Gm5093	chr17	46439578	46440099	0.348418	0.921803	0.500748	0.112787	0.63511	0.306768	1.00585
Gm9844	chr7	24862202	24862675	0.383701	0.789561	0.441165	0.124209	0.586631	0.282687	1.00555
Prima1	chr12	103196908	103202884	1.22477	0.652989	0.463567	0.453111	0.938878	0.458339	1.00492
Dock3	chr9	107256044	107257292	0.910099	1.15576	0.20928	0.80134	1.03293	0.50531	1.00462
Tnni2	chr7	142442908	142444408	0.545259	0.463051	0.208973	0.274567	0.504155	0.24177	1.00462
Epx	chr11	87869373	87871768	0.872935	0.736365	0.414559	0.368583	0.80465	0.391571	1.0045
Tas2r107	chr6	131659118	131660149	0.748997	0.725294	0.202628	0.513444	0.737146	0.358036	1.00406
Olfr894	chr9	38218818	38219766	0.622857	0.450702	0.330525	0.186117	0.536779	0.258321	1.00305
Tnnt3	chr7	142491074	142506771	1.11513	0.756092	0.506197	0.408802	0.935613	0.457499	1.00249
Tnnc2	chr2	164777161	164779741	1.2684	0.393579	0.44561	0.364974	0.830988	0.405292	1.00244
Olfr984	chr9	40100544	40101488	1.39533	0.735491	0.608528	0.436111	1.06541	0.522319	1.0024
Spag11b	chr8	19140759	19143010	1.19123	0.759709	0.51071	0.444438	0.975468	0.477574	1.00195
Muc2	chr7	141695703	141697247	1.17718	0.622888	0.575228	0.304854	0.900033	0.440041	1.00152
Olfr519	chr7	108893461	108894420	1.08935	0.556922	0.435651	0.367968	0.823136	0.40181	1.00091
Olfr765	chr10	129046132	129047061	0.635582	0.344933	0.281065	0.189919	0.490257	0.235492	1.0008
Npr1	chr3	90450710	90451781	0.678635	0.299242	0.195068	0.274603	0.488938	0.234835	1.00079
Vmn1r169	chr7	23577185	23578099	0.944155	0.409018	0.399942	0.257377	0.676587	0.328659	1.00057
Tpsb2	chr17	25366550	25368094	1.11832	0.553678	0.473718	0.342961	0.835999	0.408339	1.00055
Gm13821	chr5	114842349	114842862	0.265381	1.2482	0.508542	0.229085	0.75679	0.368814	1.00031
Gm9376	chr14	118253716	118254258	0.418679	0.196923	0.288829	0	0.307801	0.144415	0.999867
Olfr1445	chr19	12883855	12884855	0.953885	0.534111	0.313355	0.411713	0.743998	0.362534	0.999865
Shb	chr4	45639936	45642304	1.03643	0.789894	0.397217	0.497044	0.913162	0.447131	0.999843
Olfr1298	chr2	111645057	111645995	1.06529	0.740191	0.445394	0.438897	0.902741	0.442146	0.999121
Olfr982	chr9	40074297	40075262	0.800171	0.387424	0.270591	0.304736	0.593798	0.287663	0.998718
1700034O15Rik	chr6	41684431	41685717	1.02454	0.789298	0.203101	0.686188	0.906921	0.444644	0.997828
Cep85l	chr10	53474964	53475467	0.631507	0.10608	0	0.350446	0.368794	0.175223	0.997458
Lrp3	chr7	35200878	35203224	1.16238	0.660619	0.467763	0.426448	0.911501	0.447106	0.997298
Tmprss5	chr9	49102728	49117585	1.07719	0.766452	0.460926	0.443801	0.921822	0.452363	0.997026
Krt42	chr11	100262887	100269871	1.04151	0.528139	0.261952	0.505726	0.784826	0.383839	0.996604
Tmprss5	chr9	49109002	49117585	1.14413	0.890661	0.493305	0.507542	1.01739	0.500424	0.99653
Pdia2	chr17	26197494	26199008	1.4706	0.529352	0.517605	0.466336	0.999976	0.491971	0.995732
Tmprss5	chr9	49102779	49117585	1.0809	0.765482	0.462513	0.445329	0.923192	0.453921	0.994313
Cacna1i	chr15	80389328	80390917	0.629124	0.269004	0.0986379	0.333254	0.449064	0.215946	0.994152
Cacna1i	chr15	80389328	80390917	0.629124	0.269004	0.0986379	0.333254	0.449064	0.215946	0.994152
Cacna1i	chr15	80389328	80390917	0.629124	0.269004	0.0986379	0.333254	0.449064	0.215946	0.994152
Pccb	chr9	100984373	100985609	1.10271	0.345769	0.42262	0.28557	0.724241	0.354095	0.994146
Kcnh2	chr5	24324490	24325789	0.489661	0.329013	0.120642	0.27173	0.409337	0.196186	0.992862
4933412E24Rik	chr15	60014866	60016618	0.907814	0.487982	0.447331	0.235097	0.697898	0.341214	0.992732
Olfr655	chr7	104596253	104597179	1.76577	0.980472	0.789529	0.571601	1.37312	0.680565	0.992659
Olfr979	chr9	40000206	40001250	1.69691	1.73952	0.750403	0.957774	1.71821	0.854089	0.992498
Rps24	chr14	24909414	24913440	1.54686	1.15506	0.623131	0.716382	1.35096	0.669757	0.991959
Olfr704	chr7	106864982	106865929	0.575551	0.39478	0.220583	0.248417	0.485166	0.2345	0.991613
2610303G11Rik	chr9	98186527	98187152	0.653701	0.25622	0.250534	0.188099	0.45496	0.219316	0.991569
Olfr1466	chr19	13341760	13342692	0.633538	0.114608	0.168097	0.189308	0.374073	0.178703	0.991056
Fastk	chr5	24441620	24442298	0.33482	0.314961	0.307971	0	0.32489	0.153986	0.990817
Sp100	chr1	85703442	85707995	0.758807	0.540046	0.29847	0.336133	0.649427	0.317301	0.990768
Gm20509	chr9	73102470	73103839	0.431453	0.156101	0.190796	0.0859488	0.293777	0.138372	0.990401
Olfr380	chr11	73453275	73454210	0.38862	0.342721	0.223411	0.125801	0.365671	0.174606	0.990036
Rps24	chr14	24622159	24629200	1.01371	0.425165	0.371188	0.334422	0.719439	0.352805	0.989682
Cdhr4	chr9	107995690	107998062	1.64783	0.856154	0.57279	0.669879	1.25199	0.621335	0.988899
Olfr513	chr7	108754858	108755787	1.17338	0.287444	0.337278	0.379838	0.730413	0.358558	0.988793
Fem1c	chr18	46464994	46465816	0.662968	0.714593	0.317607	0.357685	0.68878	0.337646	0.988518
Vmn1r66	chr7	10273828	10275351	0.447525	0.245572	0.137213	0.193159	0.346548	0.165186	0.988327
Spata20	chr11	94483353	94485099	1.1712	0.795695	0.568566	0.404407	0.983447	0.486486	0.987559
Olfr30	chr11	58454915	58455980	1.9194	0.501544	0.539455	0.662757	1.21047	0.601106	0.987268
Pabpc6	chr17	9422060	9422458	0.455825	0.133996	0.131023	0.147556	0.294911	0.13929	0.987049
Apip	chr2	103177787	103182894	0.970256	0.638476	0.378679	0.414937	0.804366	0.396808	0.985298
Jrk	chr15	74709161	74710374	0.973791	0.39636	0.430627	0.242483	0.685075	0.336555	0.985282
4933421I07Rik	chr7	42445462	42448120	1.12859	0.864602	0.589824	0.398552	0.996596	0.494188	0.984494
Spry1	chr3	37613923	37614826	0.553268	0.413995	0.404808	0.0651271	0.483631	0.234968	0.984296
Prop1	chr11	50952214	50953751	1.47817	0.695248	0.543856	0.535923	1.08671	0.539889	0.984081
Sult5a1	chr8	123157001	123158274	0.927929	0.71342	0.164138	0.646977	0.820675	0.405558	0.983518
Tnnt2	chr1	135877318	135878275	1.28147	0.725511	0.38199	0.614561	1.00349	0.498276	0.982782
Olfr1394	chr11	49160016	49160954	2.66323	1.30957	1.11348	0.877794	1.9864	0.99564	0.982767
Vmn1r220	chr13	23183628	23184524	0.354827	0.417226	0.174843	0.196906	0.386027	0.185875	0.982502
Tspo2	chr17	48448519	48450073	1.16961	0.928323	0.437052	0.605787	1.04897	0.521419	0.98242
Slfnl1	chr4	120529155	120530186	0.748997	0.414454	0.455914	0.114099	0.581725	0.285006	0.982071
Olfr1385	chr11	49494535	49495464	1.32005	1.09229	0.505917	0.69637	1.20617	0.601144	0.982046
Vmn1r57	chr7	5220478	5221410	1.16961	0.859559	0.50429	0.504822	1.01458	0.504556	0.980908
Olfr76	chr19	12119653	12120700	1.69205	0.918284	0.798139	0.505605	1.30517	0.651872	0.980717
Entpd8	chr2	25084677	25085574	0.911396	0.476299	0.291081	0.393374	0.693847	0.342227	0.98019
Il1rn	chr2	24345310	24350936	1.30903	0.693604	0.47382	0.523147	1.00132	0.498483	0.979066
Cd7	chr11	121037885	121039418	1.42274	1.185	0.920149	0.3838	1.30387	0.651975	0.979062
Olfr1333	chr4	118829485	118830440	0.808541	0.671103	0.0546842	0.677431	0.739822	0.366058	0.978173
Art5	chr7	102097114	102099939	0.933183	0.435133	0.258986	0.416666	0.684158	0.337826	0.978071
4932415D10Rik	chr10	82282116	82285278	0.876883	0.422578	0.380144	0.260591	0.64973	0.320368	0.977988
Fscb	chr12	64471333	64474898	0.369767	0.374822	0.161262	0.198121	0.372294	0.179691	0.976659
Pih1d1	chr7	45147538	45147850	0.435801	0.341627	0	0.376198	0.388714	0.188099	0.976194
Retnlb	chr16	48816856	48818891	0.535975	0.341375	0.282446	0.144585	0.438675	0.213515	0.976064
Abcg4	chr9	44277503	44279791	1.2117	0.724072	0.502455	0.462974	0.967886	0.482715	0.975575
Olfr1369-ps1	chr13	21115694	21116647	0.714914	0.616468	0.164397	0.49371	0.665691	0.329053	0.975506
Olfr155	chr4	43854292	43855463	0.931096	0.410564	0.312241	0.351642	0.67083	0.331942	0.974346
Clec2j	chr6	128652438	128657032	0.405704	0.407238	0.216166	0.17938	0.406471	0.197773	0.97169
B3gnt3	chr8	71709689	71712179	1.11344	0.493651	0.398749	0.401796	0.803546	0.400273	0.971592
Fam115c	chr6	42626410	42629440	0.690054	0.793766	0.310461	0.427334	0.74191	0.368897	0.971381
Dok2	chr14	70773272	70776012	0.729885	0.429121	0.228872	0.34367	0.579503	0.286271	0.970388
Ankrd24	chr10	81628706	81629742	0.570001	0.567126	0.0504128	0.510968	0.568564	0.280691	0.970372
Tdg	chr10	82651308	82653199	0.648864	0.593423	0.303943	0.311178	0.621143	0.30756	0.970216
Slc15a4	chr5	127541626	127564866	0.931243	0.683231	0.384646	0.420517	0.807237	0.402582	0.970099
2001-09-01	chr7	127216680	127218455	0.998464	0.632182	0.382666	0.430954	0.815323	0.40681	0.96975
Tspo2	chr17	48448568	48450070	1.08907	0.924869	0.382608	0.626746	1.00697	0.504677	0.969711
Sh2d7	chr9	54538984	54545020	1.03937	0.513656	0.432981	0.341332	0.776512	0.387157	0.969157
Pcdh7	chr5	59053599	59054552	0.810236	0.112085	0.328793	0.123428	0.46116	0.22611	0.968933
Olfr638	chr7	104003259	104004224	0.706033	0.774849	0.432945	0.304736	0.740441	0.36884	0.968742
Spag11b	chr8	19140798	19142749	1.25784	0.876468	0.5892	0.482581	1.06715	0.535891	0.968435
Olfr43	chr11	74206198	74207289	0.58293	0.391682	0.0478737	0.431318	0.487306	0.239596	0.968191
Ces1f	chr8	93265387	93267278	1.24966	0.565164	0.442098	0.466767	0.907414	0.454433	0.96788
Ceacam16	chr7	19852097	19861299	0.785559	0.319521	0.284028	0.262292	0.55254	0.27316	0.967071
Olfr1333	chr4	118829485	118836273	0.796989	0.44101	0.215612	0.398917	0.618999	0.307264	0.966581
Muc5ac	chr7	141789011	141819135	1.10634	0.557274	0.388724	0.443638	0.831806	0.416181	0.966514
Ccin	chr4	43983504	43985533	0.739144	0.342384	0.360539	0.174015	0.540764	0.267277	0.966338
Adamts7	chr9	90193729	90195821	0.760343	0.332078	0.174843	0.365683	0.546211	0.270263	0.965315
Nkx6-3	chr8	23120949	23127046	0.894756	0.526053	0.351493	0.357227	0.710405	0.35436	0.965306
Olfr578	chr7	102984221	102985162	0.868825	0.79459	0.332982	0.499999	0.831708	0.41649	0.965297
Fcnb	chr2	28079739	28084885	0.989407	0.550538	0.426594	0.343161	0.769972	0.384877	0.965274
Olfr1023	chr2	85886802	85887737	0.825817	0.0571202	0.0558527	0.377403	0.441469	0.216628	0.965249
Ces1d	chr8	93194805	93197777	1.03998	0.611435	0.351686	0.475277	0.825707	0.413481	0.965078
Cacnb4	chr2	52619732	52620601	0.365839	0.184361	0.0600898	0.203017	0.2751	0.131553	0.963843
1700010H22Rik	chr5	98564197	98566762	0.832822	0.416715	0.346348	0.275331	0.624769	0.310839	0.963778
Tmem63a	chr1	180945906	180946714	1.57369	0.528698	0.258483	0.800524	1.0512	0.529503	0.9637
Mink1	chr11	70555638	70557227	0.772107	0.403506	0.361672	0.22217	0.587807	0.291921	0.963623
Spata3	chr1	86021961	86024669	0.990271	0.86838	0.347363	0.586793	0.929325	0.467078	0.96351
Spata3	chr1	86021946	86024668	0.985179	0.863915	0.345577	0.583776	0.924547	0.464677	0.963361
Spata3	chr1	86021943	86024666	0.984818	0.863598	0.34545	0.583562	0.924208	0.464506	0.963351
7420426K07Rik	chr9	98903119	98904622	0.362781	0.462127	0.208556	0.195728	0.412454	0.202142	0.962696
Slc15a4	chr5	127538260	127564866	0.815142	0.596797	0.335985	0.369531	0.705969	0.352758	0.96264
BC027072	chr17	71713272	71729669	1.16181	0.772722	0.475024	0.499062	0.967265	0.487043	0.962032
Ifitm6	chr7	141029131	141029620	0.556757	0.545557	0.42676	0.120153	0.551157	0.273456	0.961951
1700039E15Rik	chr7	45287136	45288998	0.976243	0.373075	0.420919	0.252818	0.674659	0.336868	0.961908
Olfr1388	chr11	49443853	49444788	1.11728	1.31377	0.726085	0.503204	1.21552	0.614645	0.961657
Serpina1d	chr12	103763594	103773592	0.341048	0.165757	0.09411	0.147202	0.253402	0.120656	0.961339
Sqrdl	chr2	122784944	122788018	0.813258	0.643313	0.289017	0.440365	0.728286	0.364691	0.960782
Acbd4	chr11	103103252	103104482	0.664853	0.260591	0.169872	0.286961	0.462722	0.228417	0.959774
Serpina10	chr12	103616675	103631421	0.530317	0.402425	0.24106	0.219578	0.466371	0.230319	0.959617
Serpina10	chr12	103616675	103631444	0.529491	0.401799	0.240685	0.219236	0.465645	0.22996	0.959529
Ces1d	chr8	93166303	93169975	0.817022	0.887922	0.569323	0.288524	0.852472	0.428924	0.959374
Olfr1039	chr2	86130702	86131661	0.189452	0.389846	0.217825	0.061328	0.289649	0.139577	0.958392
Olfr1263	chr2	90014891	90015919	0.618619	0.46762	0.254024	0.286078	0.54312	0.270051	0.958234
Sh2d4a	chr8	68120351	68121527	0.540832	0.499669	0.266498	0.250106	0.52025	0.258302	0.958118
Olfr160	chr9	37711348	37712277	0.5378	0.632376	0.393491	0.189919	0.585088	0.291705	0.957978
Rec8	chr14	55623569	55624510	0.289608	0.340539	0.0554969	0.25	0.315074	0.152748	0.957618
Rpl7	chr1	16101295	16102082	0.577012	0.135697	0.199028	0.149429	0.356354	0.174229	0.955859
Ms4a6c	chr19	11461139	11463288	1.43807	0.72115	0.656516	0.438139	1.07961	0.547327	0.955252
2200002J24Rik	chr7	30699783	30700380	0.988446	0.447028	0.52453	0.196906	0.717737	0.360718	0.955143
H2-M9	chr17	36640406	36642666	1.32725	0.614807	0.462434	0.520787	0.971031	0.49161	0.954436
Prss8	chr7	127933007	127935514	0.652658	0.298446	0.166756	0.305173	0.475552	0.235965	0.954184
4732456N10Rik	chr15	101552356	101562950	1.12008	0.656007	0.370067	0.527902	0.888045	0.448984	0.953812
Olfr376	chr11	73371266	73375496	0.698524	0.505455	0.296543	0.306133	0.60199	0.301338	0.953651
Tmprss5	chr9	49102821	49116991	1.06203	0.773427	0.475893	0.452852	0.91773	0.464372	0.953622
Muc5ac	chr7	141789011	141818886	1.10186	0.55655	0.391963	0.445365	0.829206	0.418664	0.95362
Olfr616	chr7	103564324	103565277	1.00088	0.840638	0.438391	0.49371	0.920759	0.46605	0.953275
Fuom	chr7	140099474	140102320	0.399267	0.206572	0.128538	0.165437	0.302919	0.146987	0.95304
Serpina3j	chr12	104314553	104320725	1.24481	0.918069	0.592818	0.505487	1.08144	0.549153	0.952969
Olfr645	chr7	104084043	104085175	0.762491	0.424696	0.230707	0.363746	0.593594	0.297226	0.952602
Isg20	chr7	78913981	78917018	0.778263	0.387169	0.292537	0.290692	0.582716	0.291615	0.95256
Lgals1	chr15	78926725	78930465	0.595551	0.300122	0.22359	0.220328	0.447837	0.221959	0.952319
Olfr630	chr7	103754587	103755652	1.06634	0.702161	0.34329	0.552298	0.884248	0.447794	0.951385
Gm8994	chr6	136328543	136329778	0.772524	0.389305	0.296073	0.285801	0.580914	0.290937	0.951345
Defb42	chr14	63046991	63048600	1.04493	0.664156	0.389651	0.475388	0.854542	0.432519	0.9511
Olfr1102	chr2	87001932	87002994	0.598833	0.603551	0.0491798	0.553856	0.601192	0.301518	0.950908
Mptx1	chr1	174330518	174332873	0.559672	0.431166	0.244083	0.249894	0.495419	0.246988	0.949856
Gm5145	chr17	20570362	20571198	0.814848	0.383258	0.249836	0.351702	0.599053	0.300769	0.949249
Zfp354c	chr11	50781770	50782798	0.839555	0.779367	0.304829	0.514941	0.809461	0.409885	0.948749
Vmn1r19	chr6	57404366	57405483	0.325356	0.28693	0.140281	0.157983	0.306143	0.149132	0.948686
Olfr351	chr2	36859414	36860346	0.487337	0.630343	0.560323	0	0.55884	0.280161	0.948159
Chrna4	chr2	181022311	181039305	1.07284	0.487614	0.384511	0.405317	0.780226	0.394914	0.948124
Fndc1	chr17	7761300	7767675	1.25509	0.972693	0.582143	0.55403	1.11389	0.568087	0.947546
Scrn1	chr6	54551718	54554446	0.849723	0.489782	0.287348	0.388329	0.669752	0.337838	0.947365
4930578I07Rik	chr14	66937365	66938736	2.28668	1.32492	0.609657	1.24444	1.8058	0.927049	0.947243
Prss8	chr7	127933416	127935450	0.625611	0.21018	0.154137	0.26038	0.417896	0.207259	0.947177
Gm16519	chr17	70929058	70929546	1.48772	0.765341	0.427633	0.722392	1.12653	0.575012	0.94663
Ano2	chr6	125654931	125656627	0.830598	0.787633	0.369674	0.451016	0.809116	0.410345	0.946553
Gabbr2	chr4	47008316	47010781	0.995661	0.65042	0.381592	0.453619	0.823041	0.417605	0.946436
P2rx1	chr11	72982097	72983545	0.878619	0.627258	0.396866	0.365683	0.752939	0.381274	0.946266
Ly6f	chr15	75268421	75272234	0.917954	0.742953	0.534569	0.308731	0.830453	0.42165	0.945774
Olfr10	chr11	49317548	49318489	1.30324	1.19188	0.776957	0.499999	1.24756	0.638478	0.945137
Gsto2	chr19	47862995	47864567	1.0406	0.203933	0.365581	0.261999	0.622268	0.31379	0.944793
Olfr59	chr11	74283794	74289619	0.569722	0.367076	0.215358	0.252639	0.468399	0.233998	0.943944
Duox2	chr2	122282708	122285569	1.08031	0.541744	0.310527	0.514281	0.811029	0.412404	0.942908
Drd5	chr5	38319509	38322310	0.86004	0.400698	0.279861	0.3572	0.630369	0.318531	0.942456
Siglec1	chr2	131083573	131086765	0.954084	0.770238	0.343827	0.534724	0.862161	0.439275	0.94203
Il1b	chr2	129364570	129371139	1.0727	0.504536	0.461511	0.340525	0.788617	0.401018	0.941951
Mtnr1b	chr9	15862614	15874556	0.99366	0.65359	0.385203	0.453529	0.823625	0.419366	0.941532
Masp2	chr4	148602575	148604417	1.06085	0.406133	0.425487	0.319452	0.733492	0.372469	0.941403
Rpl10-ps3	chr9	50344240	50344981	0.428948	0.504383	0.0704557	0.396731	0.466665	0.233593	0.941001
Aipl1	chr11	71928471	71940122	0.983356	0.688267	0.417256	0.434539	0.835812	0.425897	0.940915
Slc15a4	chr5	127553254	127564486	0.975511	0.723459	0.404896	0.46123	0.849485	0.433063	0.940774
Klhl38	chr15	58314573	58324169	0.781735	0.534813	0.305051	0.361949	0.658274	0.3335	0.940568
Sdk2	chr11	114251843	114253127	0.672297	0.291247	0.162733	0.320719	0.481772	0.241726	0.939485
Olfr525	chr7	140322602	140323651	0.909371	0.560105	0.298732	0.448571	0.734738	0.373651	0.939395
Ido2	chr8	24533456	24540796	0.898098	0.757433	0.363191	0.481201	0.827765	0.422196	0.939279
Pfpl	chr19	12427905	12432110	1.02699	0.788113	0.6339	0.293955	0.90755	0.463927	0.9389
Cacna1i	chr15	80389328	80393820	0.72863	0.261789	0.209438	0.288281	0.49521	0.24886	0.938779
Abcg4	chr9	44280648	44281658	0.809529	0.687477	0.413674	0.349406	0.748503	0.38154	0.936773
Runx1t1	chr4	13889220	13889962	0.856742	0.863492	0.562887	0.316958	0.860117	0.439922	0.936534
Pdia2	chr17	26196226	26201143	0.915288	0.337007	0.372048	0.263369	0.626147	0.317709	0.936391
Lifr	chr15	7253511	7254768	0.903588	0.892493	0.498678	0.421204	0.89804	0.459941	0.935906
Olfr429	chr1	174089038	174089980	0.578603	0.850444	0.166314	0.561903	0.714523	0.364108	0.935542
Olfr332	chr11	58489719	58490753	1.53758	0.309939	0.606123	0.341304	0.923761	0.473713	0.934928
Olfr1459	chr19	13145643	13146743	1.81709	1.74816	1.04461	0.802111	1.78262	0.923362	0.934304
Ggact	chr14	122886903	122889828	0.60604	0.49335	0.214401	0.342062	0.549695	0.278232	0.934026
Olfr1341	chr4	118709409	118710347	2.22743	1.48038	0.668091	1.25399	1.8539	0.961041	0.933739
Olfr726	chr14	50083714	50084679	0.376551	0.332078	0.108236	0.243788	0.354314	0.176012	0.933698
Olfr330	chr11	58529037	58529984	0.719439	0.225589	0.165437	0.310522	0.472514	0.237979	0.933186
Trim47	chr11	116106392	116108035	0.414859	0.357731	0.0635987	0.322308	0.386295	0.192953	0.932285
Eps8l2	chr7	141361537	141362667	0.482425	0.425447	0.0924458	0.364389	0.453936	0.228418	0.932173
Pramef6	chr4	143894237	143900380	0.370024	0.287163	0.153159	0.172485	0.328593	0.162822	0.931402
Col6a1	chr10	76715016	76719236	1.10951	0.557318	0.408713	0.446339	0.833416	0.427526	0.931398
Cd209b	chr8	3918644	3926798	0.970144	0.590044	0.474381	0.324877	0.780094	0.399629	0.931178
Olfr1098	chr2	86922583	86923530	0.383701	0.112794	0.0551457	0.186313	0.248248	0.120729	0.930996
Gm5592	chr7	41284327	41290183	0.597759	0.410774	0.258847	0.251302	0.504267	0.255074	0.93065
S100a6	chr3	90609810	90611780	0.92275	0.813768	0.503949	0.388318	0.868259	0.446133	0.93033
Gm3424	chr14	5861591	5863663	0.394806	0.206327	0.126093	0.170405	0.300567	0.148249	0.930282
Pdzk1ip1	chr4	115090254	115091231	1.72018	0.710674	0.534541	0.722392	1.21543	0.628466	0.929967
Abcc3	chr11	94364210	94367923	1.05285	0.777352	0.450431	0.491417	0.915102	0.470924	0.9297
Masp2	chr4	148602554	148604417	1.09768	0.401558	0.420693	0.347438	0.749621	0.384065	0.92965
Olfr1270	chr2	90149019	90150036	0.848627	0.997865	0.256769	0.694007	0.923246	0.475388	0.929139
Lcp2	chr11	34087004	34090753	0.654747	0.413459	0.306698	0.2355	0.534103	0.271099	0.928739
Phc2	chr4	128637471	128638447	0.930778	0.875571	0.267544	0.66287	0.903175	0.465207	0.928045
Pcbd1	chr10	61038229	61042811	0.505978	0.384973	0.205325	0.244081	0.445475	0.224703	0.927742
Vipr1	chr9	121664615	121665907	1.26595	1.24048	0.889496	0.409802	1.25321	0.649649	0.927009
Zfp354c	chr11	50776179	50777015	1.24943	0.70264	0.374753	0.633064	0.976037	0.503909	0.926902
Tlr11	chr14	50360502	50363662	1.0069	0.21988	0.347308	0.279381	0.613388	0.313345	0.926077
Prss8	chr7	127932902	127935429	0.629509	0.296085	0.165437	0.302759	0.462797	0.234098	0.926034
2001-09-01	chr7	127216765	127218426	1.01224	0.675545	0.408914	0.460514	0.84389	0.434714	0.925886
Olfr1329	chr4	118916524	118917465	1.54458	1.41891	0.665963	0.874999	1.48174	0.770481	0.925835
4933412E24Rik	chr15	59994430	59994828	0.455825	0.669982	0.131023	0.442669	0.562903	0.286846	0.925735
Nrsn1	chr13	25253408	25262682	1.04418	0.587966	0.434007	0.406253	0.816074	0.42013	0.925695
Tbcb	chr7	30232932	30233382	0.504086	0	0.115916	0.130543	0.252043	0.12323	0.925468
Clic3	chr2	25445822	25446542	1.51352	0.296613	0.362539	0.571601	0.905064	0.46707	0.925413
Kdm6b	chr11	69464610	69465694	0.880036	0.197104	0.385461	0.162788	0.53857	0.274124	0.925289
Olfr1427	chr19	12098702	12099639	1.45422	0.341991	0.61307	0.313832	0.898104	0.463451	0.925273
Slc6a12	chr6	121343399	121347607	0.378094	0.330263	0.186308	0.167854	0.354179	0.177081	0.92488
Muc2	chr7	141746832	141754690	1.31332	0.727918	0.53216	0.524398	1.02062	0.528279	0.924428
Gfi1b	chr2	28614784	28615405	0.950307	0.601691	0.420242	0.378617	0.775999	0.399429	0.924298
H2-M10.1	chr17	36322858	36326155	0.937495	0.632237	0.380435	0.428441	0.784866	0.404438	0.923128
Olfr376	chr11	73371246	73375704	0.662807	0.47961	0.293104	0.29048	0.571208	0.291792	0.922986
Olfr376	chr11	73371246	73375704	0.662807	0.47961	0.293104	0.29048	0.571208	0.291792	0.922986
Olfr376	chr11	73371246	73375704	0.662807	0.47961	0.293104	0.29048	0.571208	0.291792	0.922986
Unc13a	chr8	71641460	71645953	1.13317	0.797091	0.48858	0.510931	0.965131	0.499756	0.922414
Cyp2d26	chr15	82790107	82794245	1.505	0.878374	0.656792	0.583202	1.19169	0.619997	0.920798
Gm8521	chrY	3859229	3859672	0.30722	0.481663	0	0.397804	0.394441	0.198902	0.920639
Oprl1	chr2	181715703	181719372	1.30087	0.626424	0.470076	0.529393	0.963647	0.499734	0.920256
Oprl1	chr2	181715702	181719372	1.30052	0.626253	0.469948	0.529249	0.963385	0.499598	0.920249
Kif21b	chr1	136105406	136112058	0.956801	0.634856	0.353602	0.469017	0.795828	0.41131	0.919388
Col6a1	chr10	76708792	76726168	1.00477	0.523046	0.406143	0.382855	0.763909	0.394499	0.919153
Synj2	chr17	6007612	6010490	1.20028	0.389981	0.453961	0.368096	0.795131	0.411028	0.919088
Olfr521	chr7	99767164	99768130	0.705303	0.60818	0.432497	0.243536	0.656741	0.338017	0.918364
Ankk1	chr9	49415222	49427021	0.96717	0.493867	0.349998	0.404141	0.730519	0.377069	0.918302
Olfr161	chr16	3592398	3593339	1.54458	0.681077	0.72146	0.437499	1.11283	0.57948	0.918012
Olfr692	chr7	105368230	105369355	0.847992	0.569782	0.417853	0.313721	0.708887	0.365787	0.917674
Trim47	chr11	116105752	116108119	0.364824	0.270935	0.0441538	0.27349	0.317879	0.158822	0.917509
Rbl1	chr2	157222539	157223952	0.868211	0.756217	0.258803	0.58292	0.812214	0.420861	0.916412
Pdia2	chr17	26196006	26196916	0.748659	0.762941	0.459083	0.323133	0.7558	0.391108	0.915919
Olfr285	chr15	98312589	98313548	1.75243	1.55938	0.816845	0.919921	1.65591	0.868383	0.915571
Tmprss5	chr9	49106080	49117101	1.07257	0.780965	0.488536	0.475401	0.926765	0.481968	0.915194
Itih3	chr14	30908573	30923760	1.35316	0.700517	0.550731	0.519439	1.02684	0.535085	0.91506
Olfr1218	chr2	89054489	89055424	0.728662	0.571202	0.167558	0.503204	0.649932	0.335381	0.914318
Psg25	chr7	18519704	18532227	0.99113	0.41409	0.388204	0.33847	0.70261	0.363337	0.914298
Cyp2d34	chr15	82615965	82620907	1.16822	0.973459	0.58169	0.535985	1.07084	0.558837	0.914
Rcvrn	chr11	67682172	67683564	1.99108	1.11305	0.825641	0.803032	1.55206	0.814337	0.913812
Gm10228	chr16	89040921	89041452	0.512803	0.703481	0.294801	0.332001	0.608142	0.313401	0.913453
Svs3b	chr2	164254363	164256640	0.778434	0.727569	0.367186	0.41352	0.753001	0.390353	0.913294
Vldlr	chr19	27217458	27249763	0.89372	0.539511	0.386754	0.355371	0.716615	0.371062	0.913184
Parp12	chr6	39089016	39091093	0.918998	0.360204	0.377368	0.283325	0.639601	0.330347	0.912421
Cyp4f16	chr17	32542633	32544221	0.801208	0.5047	0.2303	0.444619	0.652954	0.337459	0.912344
Dnahc1	chr14	31260375	31323896	1.16602	0.582436	0.469929	0.44025	0.87423	0.455089	0.912154
Olfr1037	chr2	86084730	86085854	0.323332	0.0950481	0.0464694	0.157	0.20919	0.101735	0.911617
Sptbn5	chr2	120059068	120061436	0.594987	0.406231	0.264811	0.248522	0.500609	0.256667	0.911526
Krt36	chr11	100105771	100112106	1.08361	0.658181	0.396046	0.511067	0.870895	0.453557	0.911409
Olfr609	chr7	103491915	103492879	1.41353	0.775652	0.595916	0.549093	1.09459	0.572504	0.911368
Fbln2	chr6	91256001	91257826	0.672317	0.292796	0.171779	0.322426	0.482556	0.247102	0.911341
Pced1a	chr2	130421890	130424310	0.450741	0.397506	0.23753	0.194547	0.424124	0.216039	0.911314
Olfr527	chr7	140335843	140336820	1.02281	0.546672	0.213816	0.601993	0.784741	0.407905	0.91088
Spata31d1b	chr13	59712284	59719289	0.778793	0.335775	0.3134	0.260508	0.557284	0.286954	0.910759
Dab2ip	chr2	35554849	35558485	1.00013	0.396905	0.416845	0.307568	0.698519	0.362206	0.91026
Rgr	chr14	37037490	37048964	0.832104	0.47524	0.32802	0.348888	0.653672	0.338454	0.909805
Vldlr	chr19	27217357	27249727	0.891925	0.535125	0.385977	0.354657	0.713525	0.370317	0.909781
Vmn1r52	chr6	90178716	90179645	0.293345	0.402421	0.224852	0.126613	0.347883	0.175732	0.909519
Fpr-rs7	chr17	20113210	20114226	0.223542	0.210283	0.154213	0.0578908	0.216913	0.106052	0.908983
Vldlr	chr19	27217020	27249862	0.880492	0.532318	0.38043	0.353146	0.706405	0.366788	0.908783
Scgb2b7	chr7	31703779	31705754	0.299135	0.27057	0.105826	0.17877	0.284852	0.142298	0.908372
Apob	chr12	7977779	8016500	0.98283	0.498443	0.437429	0.332979	0.740637	0.385204	0.908116
Slc39a12	chr2	14328561	14330519	0.649882	0.600419	0.34692	0.300536	0.62515	0.323728	0.907838
Rasal3	chr17	32403006	32404698	0.913131	0.600016	0.370548	0.417306	0.756573	0.393927	0.907291
Fabp1	chr6	71215500	71216874	1.05818	0.894316	0.722388	0.299727	0.976246	0.511058	0.907279
Apol6	chr15	77045276	77057107	0.872326	0.506088	0.397653	0.318458	0.689207	0.358055	0.907105
Olfr821	chr10	130033628	130034560	0.877206	0.630343	0.280161	0.504822	0.753775	0.392492	0.907086
Cd3d	chr9	44981793	44987052	0.950863	0.630191	0.298164	0.526069	0.790527	0.412116	0.906997
Aven	chr2	112636628	112640559	0.959788	0.584684	0.385571	0.419252	0.772236	0.402411	0.906825
Dnase1l3	chr14	7975872	7977222	1.07697	0.237444	0.46435	0.217894	0.65721	0.341122	0.906574
Ubash3a	chr17	31208080	31216231	1.06532	0.590261	0.474556	0.389996	0.827791	0.432276	0.906061
Nr2e3	chr9	59947371	59949394	0.763799	0.264153	0.180804	0.349061	0.513976	0.264932	0.905429
Olfr735	chr14	50345376	50346440	0.981949	0.502015	0.441787	0.33169	0.741982	0.386738	0.90514
B3gat1	chr9	26733851	26757982	1.09281	0.595971	0.504757	0.378154	0.844392	0.441456	0.905036
Fam64a	chr11	72042922	72045040	0.729556	0.328003	0.296053	0.250059	0.52878	0.273056	0.904305
Dysf	chr6	84105373	84112199	0.905774	0.477712	0.367563	0.353577	0.691743	0.36057	0.902574
Mc4r	chr18	66857715	66860472	0.7089	0.620328	0.435967	0.256164	0.664614	0.346065	0.902545
Olfr1247	chr2	89609156	89610100	0.481148	0.226305	0.110642	0.249206	0.353727	0.179924	0.901288
Spata3	chr1	86022105	86029264	1.11766	0.851251	0.394276	0.641375	0.984457	0.517826	0.900731
Vmn1r223	chr13	23249238	23250323	0.460547	0.541538	0.192553	0.325276	0.501042	0.258914	0.900662
Olfr682-ps1	chr7	105126372	105128405	0.514148	0.499423	0.205617	0.318399	0.506785	0.262008	0.900569
Olfr156	chr4	43820335	43821433	1.19981	0.145945	0.38055	0.321428	0.672876	0.350989	0.900527
Vldlr	chr19	27216484	27249755	0.873238	0.52224	0.38181	0.346823	0.697739	0.364316	0.900497
Olfr403	chr11	74195505	74196446	0.386145	0.283782	0.277485	0.0624999	0.334963	0.169992	0.900369
Atp8b5	chr4	43230098	43232957	0.779006	0.523429	0.329023	0.349956	0.651218	0.339489	0.900105
Fam64a	chr11	72042524	72046093	0.522188	0.329473	0.190368	0.247374	0.425831	0.218871	0.899128
Krt6b	chr15	101676034	101680289	0.50212	0.716043	0.233384	0.401168	0.609081	0.317276	0.898492
Dmrtb1	chr4	107707057	107708644	1.05941	0.303011	0.526732	0.185374	0.681208	0.356053	0.898159
Itih3	chr14	30908576	30923587	1.34782	0.705168	0.557187	0.525529	1.02649	0.541358	0.898069
Apol6	chr15	77044729	77056298	0.884219	0.508306	0.397621	0.330758	0.696263	0.364189	0.897934
2001-09-01	chr7	127214462	127218498	0.653251	0.450284	0.310794	0.262509	0.551767	0.286651	0.897904
Mroh2a	chr1	88238108	88240937	2.28146	1.17131	1.12684	0.707331	1.72638	0.917087	0.897812
Apob	chr12	7977648	8016835	0.974624	0.49388	0.440231	0.329019	0.734252	0.384625	0.897756
Aqp5	chr15	99590849	99594608	0.653005	0.227509	0.250268	0.203557	0.440257	0.226912	0.897267
Olfr654	chr7	104587719	104588873	2.63757	0.972083	0.543149	1.3763	1.80483	0.959723	0.897014
Prss30	chr17	23973066	23975174	0.883931	0.456312	0.198305	0.502489	0.670121	0.350397	0.896988
9530053A07Rik	chr7	28115614	28120861	0.701782	0.407504	0.318769	0.258027	0.554643	0.288398	0.896922
Taar1	chr10	23920356	23921469	0.938758	0.767893	0.422355	0.47565	0.853325	0.449002	0.896284
Olfr1362	chr13	21611020	21612004	1.38483	0.651345	0.477668	0.597715	1.01809	0.537691	0.895841
Nudt16	chr9	105129338	105131805	0.62639	0.389936	0.169459	0.35783	0.508163	0.263644	0.895825
Olfr225	chr11	59612966	59613882	1.43794	0.46643	0.684119	0.321019	0.952183	0.502569	0.895007
4930578I06Rik	chr14	63971122	63987780	1.15179	0.718894	0.407957	0.579596	0.935344	0.493776	0.894255
Slpi	chr2	164354162	164356067	0.906508	0.364659	0.356566	0.308893	0.635583	0.332729	0.893279
Bpifa3	chr2	154135544	154137619	1.83977	0.978638	0.931739	0.567196	1.4092	0.749467	0.892843
Tssk4	chr14	55650184	55652539	1.31233	1.02118	0.488166	0.749681	1.16676	0.618923	0.892786
Tssk4	chr14	55650182	55652539	1.31122	1.02032	0.487752	0.749045	1.16577	0.618398	0.892768
Slc7a15	chr12	8538201	8539566	1.56444	0.861069	0.727148	0.560303	1.21275	0.643725	0.892718
Defb28	chr2	152518255	152521447	1.48097	0.853959	0.704027	0.534724	1.16746	0.619375	0.892619
Ttll10	chr4	156046787	156047940	1.26083	0.741276	0.498318	0.561199	1.00105	0.529759	0.892569
H2-M9	chr17	36639285	36642666	0.981432	0.521683	0.355528	0.435208	0.751557	0.395368	0.892569
Kcnj5	chr9	32314783	32344237	0.981768	0.677042	0.40289	0.471719	0.829405	0.437305	0.892558
Ccdc92	chr5	124791740	124796345	1.09575	0.615202	0.44265	0.46016	0.855474	0.451405	0.892376
Chrna4	chr2	181029425	181039225	1.04381	0.447311	0.400047	0.38445	0.745562	0.392248	0.892176
Itih3	chr14	30908683	30923549	1.35179	0.704853	0.562622	0.526694	1.02832	0.544658	0.892025
Cd209b	chr8	3917657	3926814	1.04759	0.595478	0.51947	0.347155	0.821535	0.433313	0.891754
Cd209b	chr8	3917657	3926814	1.04759	0.595478	0.51947	0.347155	0.821535	0.433313	0.891754
Htr1b	chr9	81631343	81632615	0.500047	0.125997	0.0410669	0.277494	0.313022	0.15928	0.89145
Folr4	chr9	14893049	14903949	1.1095	0.750397	0.422023	0.561691	0.929947	0.491857	0.891423
St3gal1	chr15	67102875	67113992	0.961064	0.538589	0.371467	0.418341	0.749826	0.394904	0.890898
Defb42	chr14	63047094	63048558	0.993169	0.729892	0.428217	0.482252	0.86153	0.455234	0.890618
Bhlha15	chr5	144198584	144199786	0.491347	0.399984	0.217282	0.2447	0.445666	0.230991	0.890214
Olfr1418	chr19	11854930	11856001	0.890708	0.398989	0.292601	0.384444	0.644849	0.338523	0.889943
Ifi27l2b	chr12	103450898	103457223	0.345003	0.371869	0.181808	0.186136	0.358436	0.183972	0.889884
Tpo	chr12	30195063	30201335	0.703084	0.392056	0.375022	0.197094	0.54757	0.286058	0.889795
Olfr211	chr6	116493611	116494540	1.36894	0.91982	0.393491	0.822983	1.14438	0.608237	0.889598
Chrna10	chr7	102111266	102116713	0.650981	0.235527	0.211108	0.248554	0.443254	0.229831	0.889365
Gm20425	chr9	103223085	103228442	0.831638	0.51888	0.292711	0.417553	0.675259	0.355132	0.889159
Olfr1497	chr19	13794665	13795609	1.2991	0.45261	0.553208	0.373809	0.875855	0.463508	0.888949
Emilin3	chr2	160901549	160903737	1.43322	0.830422	0.692583	0.51102	1.13182	0.601802	0.888787
Sardh	chr2	27211056	27215632	0.596048	0.362115	0.228438	0.270127	0.479082	0.249283	0.888753
Trem2	chr17	48346440	48354147	1.05	0.645071	0.400157	0.49648	0.847535	0.448319	0.888624
Tnnc2	chr2	164777944	164779967	1.28049	0.475475	0.464924	0.465414	0.877981	0.465169	0.887391
Slc5a9	chr4	111890497	111891996	1.42468	1.74651	0.871302	0.824249	1.58559	0.847775	0.887262
Tas2r137	chr6	40491238	40492239	1.13444	0.74701	0.469564	0.528817	0.940727	0.49919	0.887104
4930504O13Rik	chr11	58446149	58452923	1.09393	0.631316	0.401249	0.512711	0.862622	0.45698	0.887039
Elavl2	chr4	91626589	91630139	0.563395	0.526967	0.338608	0.232117	0.545181	0.285363	0.886892
1700015E13Rik	chr1	170308803	170312125	1.2041	0.675748	0.377573	0.620109	0.939925	0.498841	0.886865
Olfr916	chr9	38657458	38658390	1.41328	0.630343	0.392226	0.694131	1.02181	0.543178	0.886721
Olfr1310	chr2	112008202	112009210	1.30683	1.11274	0.414494	0.875247	1.20978	0.644871	0.886659
B3gat1	chr9	26733803	26756079	1.06543	0.571197	0.485773	0.380571	0.818313	0.433172	0.886548
Ces2c	chr8	104847125	104849664	1.36048	0.715667	0.617458	0.486761	1.03807	0.55211	0.886372
Trpv3	chr11	73252371	73254284	1.73417	0.838002	0.819406	0.553683	1.28609	0.686544	0.885822
Olfm1	chr2	28315016	28324050	0.674353	0.544409	0.289309	0.351881	0.609381	0.320595	0.884646
Olfr582	chr7	103041481	103042440	1.08935	0.668307	0.381195	0.551952	0.878829	0.466573	0.884524
Siglech	chr7	55768178	55772523	0.993905	0.873443	0.396958	0.596065	0.933674	0.496511	0.883869
Aldob	chr4	49538537	49539886	0.606247	0.831671	0.193623	0.566944	0.718959	0.380283	0.883393
2001-09-01	chr7	127214450	127218453	0.635923	0.440642	0.300299	0.264672	0.538283	0.282486	0.882676
Olfr370	chr8	83541093	83542188	1.1616	1.07319	0.333893	0.859488	1.1174	0.59669	0.882403
Fcnb	chr2	28078099	28084885	1.0116	0.559302	0.408242	0.425058	0.785452	0.41665	0.882305
Olfr283	chr15	98378096	98379197	1.19654	0.533675	0.332075	0.587681	0.865108	0.459878	0.882261
Olfr963	chr9	39669059	39669994	0.680085	0.11424	0.223411	0.188702	0.397163	0.206056	0.881951
Olfr288	chr15	98186015	98195542	0.696726	0.443293	0.2908	0.308957	0.57001	0.299879	0.881812
Olfr288	chr15	98186013	98195542	0.69658	0.4432	0.290739	0.308893	0.56989	0.299816	0.881803
Olfr502	chr7	108522909	108523967	0.944578	0.807774	0.543021	0.389164	0.876176	0.466092	0.881625
Sars	chr3	108463536	108464964	1.01819	0.710865	0.548756	0.370801	0.864527	0.459778	0.8816
Olfr1383	chr11	49523721	49524660	1.25764	0.853158	0.500535	0.626329	1.0554	0.563432	0.88146
Olfr356	chr2	36937121	36938068	1.05518	0.733164	0.330874	0.621043	0.89417	0.475959	0.881328
Arl11	chr14	61309753	61311936	0.707843	0.220321	0.215432	0.269574	0.464082	0.242503	0.881186
Nrsn1	chr13	25252192	25262685	1.04421	0.652131	0.453336	0.448827	0.848169	0.451082	0.88103
Cyp11a1	chr9	58015013	58027020	1.14732	0.712386	0.4223	0.568745	0.929851	0.495522	0.880775
Olfr1349	chr7	6514396	6515449	0.949058	0.456528	0.297598	0.446868	0.702793	0.372233	0.880698
Myh7	chr14	54970688	54994634	0.926573	0.515735	0.371123	0.393368	0.721154	0.382246	0.88055
Itgb2l	chr16	96426730	96429144	1.78862	0.59774	0.887537	0.390062	1.19318	0.638799	0.880174
Cdhr1	chr14	37077850	37098311	0.851063	0.676733	0.408782	0.402819	0.763898	0.405801	0.879376
Myh7	chr14	54970767	54994626	0.92614	0.515375	0.372476	0.392335	0.720758	0.382406	0.879169
Car9	chr4	43508543	43509035	1.01451	0.433789	0.530204	0.238843	0.72415	0.384524	0.878168
Fuom	chr7	140099494	140101244	0.545311	0.24427	0.208993	0.201742	0.39479	0.205367	0.877937
Apol6	chr15	77045206	77050699	0.91864	0.535229	0.504321	0.267906	0.726935	0.386113	0.877896
Clic3	chr2	25445843	25446476	1.64949	0.337316	0.412288	0.650039	0.993403	0.531163	0.877766
Tectb	chr19	55189578	55194694	0.73752	0.616457	0.32693	0.391195	0.676988	0.359063	0.877394
2810032G03Rik	chr12	5411641	5416630	0.938529	0.578574	0.42954	0.377555	0.758552	0.403547	0.877096
Tas2r134	chr2	51627511	51628407	1.16586	0.596037	0.349686	0.590718	0.880949	0.470202	0.877052
Spata31	chr13	64917406	64923195	0.753882	0.535569	0.306987	0.37623	0.644726	0.341609	0.876951
Slc15a3	chr19	10842550	10843471	0.936987	0.347926	0.170102	0.510845	0.642456	0.340474	0.876536
Vmn1r188	chr13	22087878	22088804	0.392393	0.173024	0.22558	0.0635112	0.282709	0.144546	0.876379
1700018C11Rik	chr4	63596902	63605261	0.685291	0.46046	0.281401	0.323953	0.572876	0.302677	0.876065
Mos	chr4	3870657	3872105	0.502068	0.368976	0.252551	0.203157	0.435522	0.227854	0.875976
Orm2	chr4	63362449	63365878	0.82188	0.545557	0.365794	0.360459	0.683718	0.363127	0.875846
Olfr433	chr1	174041933	174042936	0.86046	0.106503	0.156209	0.351842	0.483482	0.254026	0.875763
Gpr37l1	chr1	135160234	135167681	1.34916	0.581449	0.45624	0.57705	0.965304	0.516645	0.875646
Olfr1043	chr2	86162003	86162947	1.20287	0.735491	0.663849	0.373809	0.969181	0.518829	0.875453
Rin3	chr12	102354745	102361507	1.37824	0.869599	0.718892	0.487505	1.12392	0.603198	0.875398
Tspo2	chr17	48448435	48451522	1.14849	0.727173	0.507883	0.495709	0.937833	0.501796	0.8753
Cst11	chr2	148768609	148771497	0.708233	0.74025	0.506676	0.264927	0.724241	0.385801	0.873684
Olfr1134	chr2	87655981	87656919	0.774757	0.227751	0.278371	0.250798	0.501254	0.264585	0.871165
Isx	chr8	74827992	74833920	1.03529	0.649258	0.405598	0.4965	0.842275	0.451049	0.871083
Olfr382	chr11	73516259	73517197	0.726334	0.683253	0.501068	0.250798	0.704794	0.375933	0.870895
Spata3	chr1	86021960	86029262	1.09578	0.834583	0.408031	0.628816	0.96518	0.518424	0.870597
Amfr	chr8	93962844	93967021	1.11005	0.844581	0.387894	0.662308	0.977316	0.525101	0.870489
Krt31	chr11	100046646	100050551	0.663519	0.5612	0.334601	0.316532	0.61236	0.325567	0.870134
Tmub1	chr5	24446553	24447791	0.880746	0.388362	0.295357	0.380145	0.634554	0.337751	0.869962
Fuom	chr7	140099470	140102376	0.391026	0.202308	0.143868	0.162022	0.296667	0.152945	0.869312
Dynlrb2	chr8	116562678	116565134	0.795746	0.565762	0.319158	0.407356	0.680754	0.363257	0.869082
Olfr961	chr9	39646724	39647672	0.766593	0.450702	0.275438	0.372233	0.608647	0.323836	0.868837
Gm7729	chr18	27598644	27599759	0.570394	0.191629	0.187377	0.211021	0.381011	0.199199	0.86874
Actl11	chr9	107928469	107932461	1.52587	0.723037	0.549882	0.663504	1.12445	0.606693	0.867879
Ptpn3	chr4	57361192	57364292	1.18767	0.724125	0.573188	0.455659	0.955895	0.514423	0.867629
1700024P04Rik	chr13	98984090	98984565	1.52835	0.786243	0.878624	0.37106	1.1573	0.624842	0.867538
Fuom	chr7	140099470	140102441	0.382474	0.197884	0.140722	0.158479	0.290179	0.1496	0.867442
S100a14	chr3	90526849	90528837	1.7145	0.994564	0.814792	0.651206	1.35453	0.732999	0.867427
S100a14	chr3	90526849	90528837	1.7145	0.994564	0.814792	0.651206	1.35453	0.732999	0.867427
Oprl1	chr2	181715593	181719351	1.28217	0.611592	0.486761	0.532521	0.946879	0.509641	0.867188
Krt13	chr11	100119145	100120577	1.36437	0.559643	0.255371	0.780617	0.962008	0.517994	0.867027
BC021614	chr19	4057478	4059295	0.975397	0.705803	0.287558	0.615304	0.8406	0.451431	0.867019
Olfr380	chr11	73453275	73457458	0.412955	0.293902	0.199916	0.168857	0.353428	0.184387	0.866564
Myh6	chr14	54976933	54977025	0.488909	1.72466	0.56213	0.633064	1.10679	0.597597	0.866493
Oc90	chr15	65876520	65889638	0.842202	0.672433	0.358642	0.453264	0.757318	0.405953	0.866382
Retnlg	chr16	48872608	48874498	0.625162	0.424097	0.276457	0.280209	0.52463	0.278333	0.866311
Fam213b	chr4	154892825	154893955	1.76889	0.519991	0.508452	0.728779	1.14444	0.618615	0.865653
Tnfrsf23	chr7	143694264	143695087	1.04842	0.908378	0.697887	0.357251	0.978402	0.527569	0.86545
Serpinf1	chr11	75413973	75415195	1.673	1.04918	0.897662	0.577677	1.36109	0.737669	0.865353
Chrm5	chr2	112479072	112480817	1.24999	0.428696	0.329358	0.573238	0.839345	0.451298	0.865283
Ets2	chr16	95806029	95808317	1.09252	0.747429	0.502455	0.488695	0.919973	0.495575	0.865233
Mroh4	chr15	74606029	74634849	1.08856	0.586198	0.455286	0.445326	0.837377	0.450306	0.865006
Ly6c1	chr15	75045017	75048837	0.832975	0.3638	0.314681	0.323573	0.598387	0.319127	0.864843
Ly6c1	chr15	75045017	75048837	0.832975	0.3638	0.314681	0.323573	0.598387	0.319127	0.864843
Tmem229b	chr12	78973255	78980778	0.912513	0.53294	0.430787	0.344298	0.722727	0.387542	0.864336
Prss51	chr14	64086234	64097670	1.09328	0.832097	0.498235	0.540515	0.962688	0.519375	0.864277
Sla	chr15	66798750	66850721	0.91161	0.579168	0.410403	0.38969	0.745389	0.400047	0.864141
Taar7b	chr10	23999939	24001015	0.548831	0.347495	0.145621	0.327994	0.448163	0.236808	0.863851
Herpud1	chr8	94377921	94379622	0.748013	0.251302	0.184294	0.345916	0.499658	0.265105	0.863842
Slc22a12	chr19	6535845	6543019	0.912539	0.558863	0.371594	0.418484	0.735701	0.395039	0.86302
Cbln3	chr14	55882061	55884232	1.15137	0.295384	0.288829	0.487914	0.723376	0.388372	0.862624
Uba7	chr9	107975582	107980495	1.1196	0.576643	0.446821	0.467261	0.848119	0.457041	0.862416
Kcnt1	chr2	25903502	25909905	1.3987	0.834862	0.685722	0.524027	1.11678	0.604874	0.862276
4933421I07Rik	chr7	42476410	42477363	0.333627	0.44834	0.164397	0.246855	0.390983	0.205626	0.862262
Iglc2	chr16	19198401	19200351	0.792378	0.630284	0.643093	0.120707	0.711331	0.3819	0.862062
Olfr679	chr7	105085714	105086665	0.620894	0.336961	0.384398	0.123687	0.478928	0.254042	0.862048
Dynlrb2	chr8	116562469	116565169	0.740694	0.534448	0.290326	0.392354	0.637571	0.34134	0.861978
Mroh4	chr15	74606029	74636261	1.05877	0.585346	0.449585	0.436211	0.822059	0.442898	0.861808
Sohlh1	chr2	25842995	25847248	0.940581	0.439882	0.380964	0.359837	0.690232	0.370401	0.861649
Olfr1419	chr19	11870146	11871305	1.64627	1.33661	0.811212	0.812068	1.49144	0.81164	0.861099
Mbl1	chr14	41151456	41158959	0.87253	0.662607	0.411035	0.415828	0.767569	0.413431	0.860046
Olfr96	chr17	37225091	37226141	1.03829	0.610442	0.497413	0.392126	0.824367	0.44477	0.8599
Sox9	chr11	112792731	112799008	1.20226	0.510971	0.541267	0.384497	0.856614	0.462882	0.858848
Olfr1215	chr2	89001348	89002290	0.675036	0.226785	0.166314	0.312168	0.450911	0.239241	0.858495
Igf2	chr7	142650843	142653030	1.0806	0.757496	0.430076	0.56507	0.91905	0.497573	0.858098
Foxi1	chr11	34204338	34208089	1.33303	0.826478	0.65487	0.517823	1.07976	0.586346	0.857817
Ptchd2	chr4	148356379	148359460	1.37202	0.711242	0.576722	0.553982	1.04163	0.565352	0.857714
Tpo	chr12	30092124	30094999	1.09087	0.557697	0.563498	0.327538	0.824281	0.445518	0.857377
Nlrp2	chr7	5350542	5360682	0.80257	0.500851	0.381479	0.31931	0.651711	0.350394	0.856867
Olfr452	chr6	42790041	42790994	0.857897	0.728553	0.0547989	0.802279	0.793225	0.428539	0.856843
0610040J01Rik	chr5	63800462	63809532	0.766915	0.565825	0.334266	0.382937	0.66637	0.358602	0.856424
Stab1	chr14	31156637	31157384	2.18832	1.78692	0.838686	1.33807	1.98762	1.08838	0.856396
Spns2	chr11	72494919	72502443	0.930519	0.618128	0.250101	0.586793	0.774324	0.418447	0.855681
Saa4	chr7	46728017	46732543	1.60702	1.0511	0.773721	0.676275	1.32906	0.724998	0.85568
Krt84	chr15	101525026	101532820	1.13744	0.713318	0.543236	0.460727	0.92538	0.501982	0.855512
Col17a1	chr19	47648100	47649595	0.455901	0.321645	0.174726	0.236129	0.388773	0.205428	0.85543
Aldh3a1	chr11	61208621	61218421	1.11804	0.469131	0.384045	0.474556	0.793586	0.4293	0.854996
Isca2	chr12	84791859	84799463	1.12999	0.653807	0.309338	0.658037	0.891897	0.483687	0.854897
Rab34	chr11	78189588	78191114	0.446646	0.385141	0.171179	0.269892	0.415893	0.220535	0.85469
Ccdc171	chr4	83884738	83888858	1.03714	0.622737	0.57086	0.328591	0.829937	0.449726	0.853966
Slc6a2	chr8	92960079	92998924	0.863815	0.529883	0.368743	0.383446	0.696849	0.376095	0.853961
Bnc2	chr4	84126350	84130289	0.703954	0.664915	0.305177	0.433343	0.684434	0.36926	0.853831
Ctla2a	chr13	60934155	60936625	0.386418	0.302915	0.148097	0.214437	0.344667	0.181267	0.853794
Slc2a7	chr4	150157828	150158700	0.729163	0.306212	0.419183	0.13488	0.517687	0.277031	0.853657
Itgb1bp1	chr12	21271426	21272770	0.405667	0.278254	0.272079	0.0875463	0.341961	0.179813	0.853465
Col15a1	chr4	47258535	47262299	1.00236	0.440213	0.388788	0.390936	0.721287	0.389862	0.85307
B3gat1	chr9	26733728	26761350	1.03536	0.603879	0.507205	0.381516	0.819619	0.444361	0.852874
Il24	chr1	130878331	130880790	0.702359	0.195602	0.191261	0.287195	0.448981	0.239228	0.852397
Rbp3	chr14	33954022	33964216	0.677903	0.414291	0.251263	0.334943	0.546097	0.293103	0.851988
1700018C11Rik	chr4	63634421	63639440	1.00538	0.532515	0.55194	0.281474	0.768948	0.416707	0.851515
Slc5a9	chr4	111890536	111891261	1.75361	2.65113	1.36816	1.05423	2.20237	1.2112	0.851417
Eif4e1b	chr13	54784001	54786653	0.634126	0.342592	0.256169	0.266302	0.488359	0.261235	0.851348
Gm853	chr4	130209109	130209856	4.37665	3.3594	1.67737	2.59742	3.86803	2.1374	0.849381
Capza3	chr6	140041525	140042789	0.71887	0.422645	0.289286	0.32579	0.570757	0.307538	0.848474
2210407C18Rik	chr11	58612315	58613485	1.47549	0.6392	0.401796	0.754162	1.05735	0.577979	0.847977
Gpr35	chr1	92973119	92986391	0.952328	0.555873	0.397807	0.421391	0.754101	0.409599	0.847659
Ces1c	chr8	93108511	93124529	0.272488	0.216942	0.0913782	0.161714	0.244715	0.126546	0.847597
Dirc2	chr16	35661305	35663314	1.08582	0.74478	0.442153	0.556529	0.915298	0.499341	0.847184
Gpr35	chr1	92975347	92985864	0.907814	0.564229	0.362835	0.436608	0.736022	0.399722	0.847063
Olfr632	chr7	103937382	103938335	1.28685	0.952723	0.547989	0.678851	1.11978	0.61342	0.846232
Auts2	chr5	131486204	131488482	0.55863	0.609951	0.321147	0.310004	0.584291	0.315575	0.846162
Olfr1423	chr19	12035808	12036740	1.46201	1.31799	0.896516	0.631028	1.39	0.763772	0.846142
Olfr729	chr14	50147901	50148872	0.467783	0.715061	0.215136	0.423996	0.591422	0.319566	0.846057
Kcnt1	chr2	25900277	25903395	1.03503	0.377115	0.502835	0.264267	0.706073	0.383551	0.845309
Chd6	chr2	161206689	161207280	2.15054	1.35468	1.23631	0.696156	1.75261	0.966231	0.845031
Grm6	chr11	50850986	50866177	1.00263	0.66162	0.454233	0.453421	0.832125	0.453827	0.844947
Ang2	chr14	51195486	51195923	1.76476	0.976522	0.835495	0.672088	1.37064	0.753792	0.844652
Dab2ip	chr2	35554935	35558702	0.917093	0.397295	0.416227	0.296875	0.657194	0.356551	0.8445
Tmem176a	chr6	48860356	48864297	1.0727	0.759517	0.344807	0.657153	0.916107	0.50098	0.843823
Ces1f	chr8	93265839	93267405	1.27672	0.614143	0.433705	0.601148	0.94543	0.517426	0.843526
Cttn	chr7	144417825	144420664	1.10469	0.263558	0.349748	0.393882	0.684125	0.371815	0.843495
Brsk2	chr7	141993210	142002476	0.78504	0.421162	0.259501	0.393897	0.603101	0.326699	0.843331
Vmn1r40	chr6	89714203	89715135	1.80315	1.14608	1.12065	0.504822	1.47461	0.812734	0.842816
Tspo2	chr17	48447956	48451492	1.06697	0.710442	0.472971	0.499363	0.888708	0.486167	0.842506
Folr4	chr9	14885814	14903884	1.14483	0.784025	0.480226	0.576662	0.964426	0.528444	0.842369
Slc5a2	chr7	128266300	128270064	0.784981	0.269808	0.319362	0.250199	0.527395	0.28478	0.841976
1700013G24Rik	chr4	137453284	137455461	0.876804	0.490951	0.528062	0.216253	0.683877	0.372157	0.841678
Ptpn3	chr4	57360868	57364273	1.13471	0.72207	0.567907	0.449427	0.92839	0.508667	0.841477
Vldlr	chr19	27217357	27254231	0.864364	0.532108	0.401212	0.359237	0.698236	0.380225	0.841476
4931409K22Rik	chr5	24543434	24555469	1.54131	0.968368	0.560309	0.821784	1.25484	0.691046	0.841068
1700093K21Rik	chr11	23516203	23519942	0.948274	0.528927	0.475256	0.330581	0.738601	0.402918	0.84089
Alox15	chr11	70344152	70352031	1.06747	0.86846	0.524108	0.537943	0.967966	0.531026	0.840749
Fcrls	chr3	87258939	87263738	1.15566	0.690584	0.533672	0.478359	0.923121	0.506016	0.840667
Siglec5	chr7	43351383	43351843	0.887672	0.695851	0.226803	0.638557	0.791761	0.43268	0.840623
Cpne2	chr8	94562650	94570114	1.005	0.436884	0.392173	0.39434	0.720941	0.393257	0.840182
Apoa4	chr9	46240696	46243459	1.05282	0.522266	0.43502	0.426012	0.787541	0.430516	0.839991
Efcab6	chr15	83965198	83967842	0.790757	0.565976	0.316238	0.42292	0.678367	0.369579	0.83979
Apol6	chr15	77045278	77051320	0.857755	0.566231	0.484457	0.29228	0.711993	0.388369	0.839784
Dolk	chr2	30279678	30280510	0.818761	0.577648	0.125518	0.636104	0.698205	0.380811	0.839245
Loxl4	chr19	42593982	42612813	0.975429	0.530898	0.338675	0.48458	0.753164	0.411628	0.838908
Vmn1r69	chr7	10579756	10581487	0.577545	0.185212	0.271653	0.13597	0.381378	0.203811	0.838662
Aldh3a1	chr11	61208745	61218421	1.11357	0.475142	0.388966	0.480636	0.794357	0.434801	0.838443
Defb13	chr8	21946762	21948850	0.805331	0.537461	0.225229	0.507299	0.671396	0.366264	0.837565
Hpd	chr5	123163381	123164107	0.125085	0.294165	0.215728	0	0.209625	0.107864	0.837555
Cd79b	chr11	106311341	106314762	1.11612	0.70307	0.534697	0.46453	0.909594	0.499614	0.837404
Dysf	chr6	84106551	84116879	1.11811	0.595258	0.455516	0.484497	0.856687	0.470007	0.837396
Vmn1r219	chr13	23162643	23163581	0.774757	0.341627	0.167023	0.438897	0.558192	0.30296	0.837365
Edn3	chr2	174761052	174782585	1.03673	0.707597	0.407854	0.549543	0.872166	0.478698	0.837312
Abp1	chr6	48904986	48909187	1.26602	0.877928	0.522532	0.658525	1.07197	0.590529	0.837311
Abp1	chr6	48904986	48909187	1.26602	0.877928	0.522532	0.658525	1.07197	0.590529	0.837311
Prm1	chr16	10796326	10796886	1.21574	0.85772	0.931874	0.209893	1.03673	0.570883	0.837108
H2afb1	chr2	17996422	17996946	1.47231	0.407349	0.697041	0.336428	0.939832	0.516735	0.83686
Rbms1	chr2	60888424	60888996	1.19028	0.839757	0.912358	0.205497	1.01502	0.558928	0.836607
Lemd2	chr17	27342460	27344825	1.71035	1.06206	0.861727	0.671861	1.38621	0.766794	0.836579
Myo7a	chr7	98051063	98069377	1.00048	0.572157	0.405323	0.456469	0.786319	0.430896	0.836509
Prss30	chr17	23972126	23975230	0.805401	0.499347	0.218878	0.492995	0.652374	0.355936	0.836317
Ahnak	chr19	8989284	9019195	0.79348	0.41825	0.354789	0.305082	0.605865	0.329936	0.836114
Mb	chr15	77015489	77022727	1.24365	0.605621	0.512743	0.504247	0.924635	0.508495	0.836113
Mb	chr15	77015489	77022787	1.23342	0.600643	0.508528	0.500102	0.917034	0.504315	0.835895
Ccl6	chr11	83588395	83589875	1.41226	0.938608	0.42359	0.874577	1.17543	0.649084	0.835885
Edn3	chr2	174760799	174781980	1.04323	0.704212	0.407227	0.553116	0.873721	0.480172	0.835535
Grm6	chr11	50850685	50866206	0.981314	0.657888	0.444576	0.45516	0.819601	0.449868	0.835461
Sla	chr15	66736250	66850721	0.865106	0.557662	0.392296	0.386252	0.711384	0.389274	0.835276
Rdh12	chr12	79210661	79212755	0.672804	0.663522	0.449168	0.281026	0.668163	0.365097	0.835095
Capn5	chr7	98161981	98164962	0.640402	0.304795	0.175312	0.335638	0.472598	0.255475	0.835086
Vmn1r180	chr7	23952387	23953345	1.09049	0.390252	0.381592	0.429744	0.740369	0.405668	0.83476
Kcnq2	chr2	181086979	181095421	1.04476	0.291291	0.402473	0.327741	0.668025	0.365107	0.834757
Muc5b	chr7	141839072	141873085	1.26591	0.657029	0.562527	0.496769	0.96147	0.529648	0.834723
Dennd2d	chr3	106482405	106487974	0.60407	0.335953	0.244027	0.26425	0.470012	0.254139	0.834468
Olfr1234	chr2	89362483	89363427	0.817952	0.622339	0.165962	0.623015	0.720146	0.394489	0.834191
Myo1g	chr11	6506674	6520897	1.18594	0.57509	0.455743	0.513252	0.880515	0.484497	0.834023
Tnni3	chr7	4520438	4522794	0.829506	0.544399	0.177439	0.574511	0.686953	0.375975	0.833801
Spata3	chr1	86018693	86029248	0.951927	0.709079	0.366482	0.546584	0.830503	0.456533	0.833743
Cyp4f14	chr17	32925332	32925885	0.984878	0.289519	0.377459	0.318817	0.637199	0.348138	0.833489
Gm7293	chr9	51621425	51624874	0.408558	0.309939	0.19699	0.187717	0.359249	0.192354	0.832115
Lipn	chr19	34067378	34073627	0.691122	0.624466	0.33458	0.386219	0.657794	0.3604	0.830744
Olfr24	chr9	18754656	18755709	1.50987	1.11596	0.843195	0.614444	1.31291	0.72882	0.830574
Tg	chr15	66701279	66715135	0.712035	0.709928	0.445177	0.335651	0.710982	0.390414	0.830348
Psg22	chr7	18718090	18727246	0.660403	0.361997	0.331127	0.225032	0.5112	0.27808	0.830239
Psg22	chr7	18718090	18727248	0.660259	0.361917	0.331055	0.224983	0.511088	0.278019	0.830229
Lgmn	chr12	102354745	102368573	1.17707	0.838948	0.608632	0.506625	1.00801	0.557629	0.829921
Siglech	chr7	55768184	55773476	0.996476	0.797978	0.434581	0.556158	0.897227	0.49537	0.829742
Siglech	chr7	55768184	55773476	0.996476	0.797978	0.434581	0.556158	0.897227	0.49537	0.829742
Entpd8	chr2	25080304	25082115	1.00372	0.472093	0.519319	0.292425	0.737907	0.405872	0.829253
Rtp2	chr16	23925548	23930787	0.902429	0.744831	0.548721	0.359541	0.82363	0.454131	0.829214
Ifna2	chr4	88682881	88683912	0.572762	0.518067	0.253285	0.342296	0.545415	0.297791	0.828047
Rgs3	chr4	62699680	62701153	0.771176	0.435261	0.461069	0.199711	0.603218	0.33039	0.827881
Myh7	chr14	54992692	54994548	0.489699	0.662189	0.281519	0.348748	0.575944	0.315133	0.827399
Btnl4	chr17	34469042	34475937	0.942865	0.565968	0.447275	0.38419	0.754416	0.415732	0.827326
Pdcd1	chr1	94038307	94052553	1.01488	0.731774	0.43666	0.528953	0.873327	0.482806	0.827152
Ces2c	chr8	104847068	104854483	0.490491	0.281165	0.22558	0.190534	0.385828	0.208057	0.826988
Olfr503	chr7	108544527	108545498	0.888788	0.660056	0.430273	0.423996	0.774422	0.427134	0.826905
Ip6k1	chr9	107995763	107999675	1.30142	0.765146	0.574485	0.571747	1.03329	0.573116	0.826779
Ip6k1	chr9	107995732	107999672	1.29218	0.759709	0.570403	0.567685	1.02594	0.569044	0.826612
Col15a1	chr4	47258856	47262488	0.988718	0.426775	0.374135	0.40514	0.707746	0.389637	0.826579
Plekhg3	chr12	76583231	76584086	1.2217	0.43721	0.366435	0.550233	0.829456	0.458334	0.826365
Actrt2	chr4	154666428	154667867	0.947261	0.148513	0.435651	0.163541	0.547887	0.299596	0.826121
A830073O21Rik	chr7	73808222	73816503	0.999188	0.684284	0.397672	0.533159	0.841736	0.465415	0.825892
Mustn1	chr14	30879257	30881608	0.811938	0.29551	0.355633	0.250319	0.553724	0.302976	0.825718
Glipr1	chr10	111993561	111995815	0.504086	0.71128	0.301382	0.365521	0.607683	0.333451	0.825586
Olfr690	chr7	105329217	105330278	1.58412	1.05721	0.639939	0.831567	1.32066	0.735753	0.825586
Trim47	chr11	116106339	116107740	0.454037	0.381345	0.0745765	0.377942	0.417691	0.226259	0.825515
Olfr698	chr7	106752451	106753386	1.02013	0.399842	0.279263	0.503204	0.709985	0.391234	0.825375
Tstd2	chr4	46100243	46114439	1.00885	0.62514	0.430833	0.472758	0.816993	0.451795	0.824835
Serpina5	chr12	104101113	104106137	1.21249	0.659662	0.593005	0.445223	0.936078	0.519114	0.82459
Ccdc33	chr9	58077013	58082069	1.06096	0.655488	0.403173	0.547186	0.858225	0.47518	0.824517
Olfr802	chr10	129681799	129682737	0.484223	0.683253	0.38972	0.250798	0.583738	0.320259	0.824192
Ano2	chr6	125649269	125686672	0.953035	0.677526	0.433275	0.46906	0.815281	0.451168	0.823775
Gm6816	chr7	114926959	114927726	0.473631	0.765768	0.0680705	0.61328	0.619699	0.340675	0.823758
Olfr666	chr7	104892670	104893626	0.807696	0.446935	0.38239	0.307601	0.627315	0.344995	0.823688
Ifitm1	chr7	140968040	140969825	0.687374	0.628643	0.26344	0.461506	0.658008	0.362473	0.823163
Brsk2	chr7	141998661	142001441	0.703037	0.461399	0.300773	0.338727	0.582218	0.31975	0.822663
C130026L21Rik	chr5	111742849	111748176	0.819253	0.401386	0.284547	0.386753	0.610319	0.33565	0.822613
Lcn10	chr2	25679266	25681605	0.893826	0.616899	0.357457	0.478044	0.755362	0.417751	0.822307
Alox5	chr6	116412591	116414020	1.52622	0.859919	0.548372	0.782254	1.19307	0.665313	0.822257
Gm10974	chr7	66258752	66265571	0.820034	0.337093	0.36794	0.267613	0.578563	0.317777	0.822254
Edn3	chr2	174760619	174784042	1.00549	0.716695	0.397264	0.557985	0.861095	0.477624	0.822077
Serpina3a	chr12	104115970	104121518	0.991475	0.616639	0.423953	0.46684	0.804057	0.445397	0.821967
Nsmf	chr2	25051352	25052090	0.369163	0.289389	0.353708	0	0.329276	0.176854	0.821757
Slco4a1	chr2	180467070	180468357	1.62388	1.03774	0.892949	0.594234	1.33081	0.743592	0.821533
Dennd2d	chr3	106482450	106488605	0.590884	0.303973	0.22929	0.258223	0.447429	0.243757	0.821433
Olfr1340	chr4	118726249	118727199	1.52996	0.78707	0.549717	0.742901	1.15852	0.646309	0.821075
Olfr59	chr11	74283736	74289360	0.581997	0.389697	0.269523	0.261666	0.485847	0.265595	0.820922
Krtap3-3	chr11	99550132	99550863	0.807501	0.803429	0.571345	0.321721	0.805465	0.446533	0.820892
Msantd1	chr5	34915915	34923839	0.872078	0.452003	0.32983	0.401167	0.66204	0.365498	0.82029
Olfr1100	chr2	86977829	86978797	0.469231	0.386225	0.161852	0.303792	0.427728	0.232822	0.820164
Slc25a47	chr12	108851129	108856814	1.01557	0.432531	0.376961	0.424529	0.724048	0.400745	0.819833
Usp17lc	chr7	103415072	103419880	0.349831	0.211234	0.152192	0.146912	0.280533	0.149552	0.819274
2001-09-01	chr7	127215885	127218390	0.743899	0.490696	0.375501	0.305417	0.617297	0.340459	0.819056
Prss28	chr17	25308646	25311876	1.56206	1.00939	0.728107	0.710654	1.28572	0.719381	0.818958
Lcn6	chr2	25676786	25681608	1.15957	0.820315	0.541967	0.561527	0.989945	0.551747	0.818884
Lcn5	chr2	25657955	25661977	1.24324	0.518299	0.467813	0.51221	0.880768	0.490012	0.818437
Gm5422	chr10	31248140	31251045	1.00137	0.45995	0.485722	0.324156	0.730661	0.404939	0.818274
Olfr876	chr9	37803889	37804936	0.911106	0.816253	0.39907	0.561784	0.863679	0.480427	0.818128
Slc6a4	chr11	77018177	77022346	0.741453	0.538492	0.325955	0.381205	0.639973	0.35358	0.817991
Slc6a2	chr8	92961047	93001667	0.856292	0.534369	0.386092	0.384083	0.69533	0.385088	0.817599
Stat5a	chr11	100879019	100880107	1.33608	0.294571	0.528062	0.378443	0.815326	0.453252	0.817347
Laptm4a	chr12	8873187	8877459	1.15986	0.550536	0.428208	0.523578	0.855197	0.475893	0.817304
Olfr1457	chr19	13094693	13095646	0.667253	0.392298	0.273994	0.308569	0.529775	0.291282	0.816989
Myo1g	chr11	6506548	6520958	1.17055	0.567627	0.453457	0.514762	0.86909	0.484109	0.816333
Krtap12-1	chr10	77720586	77721256	0.88091	0.318716	0.311643	0.350968	0.599813	0.331306	0.815852
Ednra	chr8	77764359	77768198	0.76965	0.50123	0.381195	0.321972	0.63544	0.351583	0.815696
Chi3l1	chr1	134183801	134186620	0.838427	0.872117	0.389305	0.563696	0.855272	0.476501	0.815627
Loxhd1	chr18	77375065	77442341	0.99281	0.586483	0.444477	0.434056	0.789647	0.439266	0.815462
Vmn1r231	chr17	20889716	20890651	1.21444	0.342721	0.614379	0.251602	0.778579	0.432991	0.815419
Adamts2	chr11	50599298	50602448	0.259738	0.288447	0.0497729	0.242899	0.274093	0.146336	0.815269
Myh7	chr14	54981174	54987418	1.05571	0.470865	0.443673	0.405384	0.76329	0.424529	0.814668
Olfr1025-ps1	chr2	85917927	85918865	0.823179	0.569378	0.334045	0.438897	0.696278	0.386471	0.814518
Samd5	chr10	9767102	9768948	0.418498	0.405254	0.226435	0.223132	0.411876	0.224783	0.814378
3110018I06Rik	chr12	107183555	107186734	0.872195	0.538008	0.394552	0.388797	0.705102	0.391674	0.81385
4930571K23Rik	chr7	125368861	125371013	1.22488	0.372489	0.31566	0.574256	0.798686	0.444958	0.813701
Ddx60	chr8	62021060	62023461	0.586813	0.623234	0.326466	0.343151	0.605023	0.334809	0.813577
Gm10113	chr13	46175428	46191048	1.01585	0.70848	0.408292	0.554037	0.862162	0.481165	0.813426
Slc22a26	chr19	7781041	7802578	0.945766	0.580867	0.563122	0.287021	0.763316	0.425072	0.812916
Cyp11b1	chr15	74834892	74841643	0.936038	0.52261	0.410358	0.401103	0.729324	0.405731	0.812887
Ptgs1	chr2	36216777	36217502	0.814175	0.294571	0.288034	0.32438	0.554373	0.306207	0.812588
Igfbp1	chr11	7197782	7202546	0.582074	0.224405	0.230397	0.210047	0.403239	0.220222	0.812185
Oc90	chr15	65876053	65901561	0.778931	0.618293	0.354546	0.422365	0.698612	0.388456	0.812137
Slc22a6	chr19	8617996	8628299	1.20467	0.736798	0.578387	0.508528	0.970733	0.543458	0.812088
Esyt3	chr9	99392840	99401283	0.840015	0.49387	0.371469	0.369537	0.666943	0.370503	0.811816
Vmn1r201	chr13	22474618	22475520	0.503527	0.355246	0.405257	0.0651992	0.429387	0.235228	0.81151
Brsk2	chr7	141997498	142002675	0.816642	0.382037	0.323078	0.341106	0.59934	0.332092	0.811394
Oc90	chr15	65876392	65892438	0.89254	0.696335	0.417	0.46962	0.794438	0.44331	0.811251
Spata3	chr1	86021946	86027178	0.964458	0.745827	0.359643	0.596287	0.855142	0.477965	0.811073
Nppa	chr4	148000722	148002079	0.66964	0.15748	0.192482	0.260125	0.41356	0.226303	0.81094
Lce1b	chr3	92655650	92656926	0.961355	0.418673	0.491259	0.276625	0.690014	0.383942	0.810733
Olfr141	chr2	86806088	86806997	0.54962	0	0.229794	0.0646977	0.27481	0.147246	0.810652
Ptpn3	chr4	57361294	57364252	1.1832	0.740807	0.600695	0.477526	0.962001	0.53911	0.810442
Slc5a9	chr4	111890168	111896352	0.948333	0.665606	0.473335	0.428354	0.806969	0.450844	0.810021
Oplah	chr15	76302064	76303200	1.27968	0.517247	0.643706	0.362467	0.898462	0.503086	0.809861
Anapc15-ps	chr10	95672991	95673451	0.986302	0.115975	0.226803	0.383134	0.551139	0.304969	0.809823
Cyp21a1	chr17	34802164	34803402	0.513769	0.258908	0.421938	0	0.386338	0.210969	0.809751
Pax4	chr6	28442349	28449251	0.81676	0.511178	0.363516	0.375271	0.663969	0.369393	0.809593
Pax4	chr6	28442349	28449251	0.81676	0.511178	0.363516	0.375271	0.663969	0.369393	0.809593
Kcnj15	chr16	95279193	95291897	0.622709	0.475521	0.288034	0.319746	0.549115	0.30389	0.809476
Olfr610	chr7	103505997	103506944	0.959252	0.789561	0.606603	0.372626	0.874406	0.489614	0.809138
Pax4	chr6	28442334	28449353	0.803148	0.502658	0.357457	0.369017	0.652903	0.363237	0.808985
Mpo	chr11	87803117	87804373	0.904306	0.467868	0.623844	0.140513	0.686087	0.382178	0.808983
Ip6k1	chr9	107995944	107999684	1.33695	0.771742	0.586923	0.598034	1.05435	0.592479	0.808735
Loxl4	chr19	42595106	42612813	0.980855	0.546481	0.351316	0.502039	0.763668	0.426677	0.808265
Insc	chr7	114768774	114791055	0.959079	0.70064	0.469241	0.459754	0.829859	0.464497	0.808205
Kcnt1	chr2	25894343	25916590	1.0566	0.586361	0.514604	0.404884	0.82148	0.459744	0.808106
Serpina3k	chr12	104338486	104345741	1.18434	0.670517	0.497132	0.543636	0.927427	0.520384	0.807752
Aqp12	chr1	93006334	93012269	0.559165	0.270205	0.167332	0.28763	0.414685	0.227481	0.807677
Rpl28-ps4	chr6	117213656	117214048	1.04126	0.680211	0.665116	0.299618	0.860737	0.482367	0.807514
Tnni3	chr7	4521042	4521984	1.25364	0.793747	0.27719	0.874071	1.02369	0.575631	0.807129
Serpinb6e	chr13	33841003	33843408	1.19057	0.711083	0.456293	0.611751	0.950828	0.534022	0.807036
5430421N21Rik	chr15	101485131	101491512	0.676827	0.393738	0.344043	0.249079	0.535282	0.296561	0.806819
Lrrc30	chr17	67630965	67632723	0.801321	0.668687	0.386365	0.435119	0.735004	0.410742	0.806779
Cdhr4	chr9	107995906	107997662	1.73386	1.06503	0.743855	0.837719	1.39945	0.790787	0.806395
Tlr12	chr4	128617502	128618592	0.458436	0.392041	0.143753	0.323785	0.425238	0.233769	0.806146
Olfr887	chr9	38084838	38085767	0.928927	0.689865	0.337278	0.569757	0.809396	0.453518	0.806003
Umod	chr7	119462866	119479255	0.726831	0.56433	0.357239	0.362805	0.64558	0.360022	0.805219
Clec4e	chr6	123287777	123289870	0.803408	0.893629	0.474348	0.477972	0.848518	0.47616	0.805214
Slc5a2	chr7	128265695	128269143	0.830536	0.232522	0.333464	0.256052	0.531529	0.294758	0.805194
Susd1	chr4	59314683	59315966	1.5227	0.45803	0.610726	0.50438	0.990365	0.557553	0.804661
Kng1	chr16	23057865	23067869	0.504448	0.288564	0.235134	0.200075	0.396506	0.217604	0.80445
Vmn1r28	chr6	58265078	58266162	0.670504	0.24638	0.289096	0.21705	0.458442	0.253073	0.80442
Gm6406	chr9	98856591	98857352	0.53703	0.140327	0.137213	0.231791	0.338678	0.184502	0.804385
Cd72	chr4	43452310	43454612	0.631782	0.278582	0.2724	0.23008	0.455182	0.25124	0.804233
Slfnl1	chr4	120527829	120529220	0.849269	0.307268	0.262893	0.380657	0.578268	0.321775	0.804027
Defb38	chr8	19023407	19026566	0.633106	0.490656	0.363962	0.260838	0.561881	0.3124	0.803978
Psg26	chr7	18474583	18484149	0.769928	0.312952	0.306008	0.29539	0.54144	0.300699	0.803948
Gm5334	chr7	68618456	68620005	0.528022	1.0003	0.134911	0.721693	0.764163	0.428302	0.803842
D730048I06Rik	chr9	35741049	35742252	0.755291	0.31084	0.347363	0.244497	0.533066	0.29593	0.803816
Foxq1	chr13	31349901	31367688	1.01223	0.709334	0.543706	0.423656	0.860782	0.483681	0.803743
1700123K08Rik	chr5	138561840	138564694	0.891852	0.655432	0.476088	0.391812	0.773642	0.43395	0.803133
Itih3	chr14	30909840	30915387	1.73744	0.896215	0.88575	0.604879	1.31683	0.745315	0.803013
Lcn5	chr2	25657955	25661645	1.31811	0.550434	0.509892	0.542332	0.934271	0.526112	0.802849
Slco3a1	chr7	74331008	74347231	0.703439	0.514082	0.31256	0.366517	0.608761	0.339538	0.802792
Vipr2	chr12	116137347	116143741	0.867422	0.785875	0.367868	0.56159	0.826648	0.464729	0.801913
Magel2	chr7	62376979	62381640	0.380367	0.229363	0.179419	0.151544	0.304865	0.165481	0.801578
Olfr288	chr15	98188294	98195445	0.680248	0.515807	0.321621	0.345742	0.598028	0.333682	0.801549
Gm12789	chr4	101986626	101990053	0.570346	0.4367	0.198254	0.360669	0.503523	0.279462	0.801548
Acaa2	chr18	74633177	74644023	0.909622	0.601335	0.419304	0.428793	0.755478	0.424049	0.801442
Olfr1377	chr11	50984658	50985720	0.384964	0.301775	0.0983596	0.276928	0.34337	0.187644	0.801055
Edn3	chr2	174769922	174782540	1.06654	0.707551	0.434995	0.564535	0.887046	0.499765	0.800802
Tab1	chr15	80115473	80116265	0.974735	1.01131	0.527396	0.593946	0.993022	0.560671	0.800619
Taar7a	chr10	23992405	23993481	0.295524	0.297853	0.0485405	0.273328	0.296688	0.160934	0.800361
Olfr1105	chr2	87033281	87034219	0.62949	0.227751	0.222697	0.250798	0.42862	0.236748	0.800026
Ndnl2	chr7	64743839	64753366	0.959191	0.538686	0.477351	0.36457	0.748938	0.42096	0.799218
Prm3	chr16	10790507	10790913	0.670298	0.788175	0.385342	0.433967	0.729236	0.409655	0.79916
Ptgds	chr2	25466712	25469157	1.07816	0.568307	0.470204	0.457328	0.823232	0.463766	0.798877
Ykt6	chr11	5990395	6000448	0.909009	0.558363	0.421178	0.404055	0.733686	0.412617	0.797777
6430531B16Rik	chr7	139975497	139978723	0.380431	0.430765	0.210603	0.237178	0.405598	0.223891	0.797769
Tex101	chr7	24668012	24672050	0.945619	0.833936	0.58245	0.422722	0.889778	0.502586	0.797272
Zfp57	chr17	37004603	37006248	0.690591	0.259852	0.349368	0.178842	0.475222	0.264105	0.796904
Hk3	chr13	54996539	54999785	0.99423	0.39518	0.418611	0.362642	0.694705	0.390627	0.796218
Lcn10	chr2	25682726	25686081	1.01613	0.637241	0.389438	0.543839	0.826687	0.466638	0.796191
Obox6	chr7	15833246	15839678	0.798685	0.407238	0.373821	0.302017	0.602962	0.337919	0.795706
Fuom	chr7	140101164	140102406	0.219478	0.215063	0.042058	0.189461	0.21727	0.115759	0.79545
Apol10b	chr15	77584158	77596125	0.543282	0.397589	0.297035	0.226291	0.470436	0.261663	0.795244
BC007180	chr3	154762157	154767787	0.605601	0.541197	0.297087	0.345031	0.573399	0.321059	0.794963
Brsk2	chr7	141993154	142002150	0.803545	0.427859	0.27891	0.412262	0.615702	0.345586	0.794376
Lcn8	chr2	25653120	25656217	1.0714	0.586764	0.253122	0.68415	0.829083	0.468636	0.794326
Gm5346	chr8	43624951	43627270	0.744743	0.622217	0.338005	0.431411	0.68348	0.384708	0.794222
Cdcp2	chr4	107080993	107087777	0.924784	0.330952	0.323608	0.381798	0.627868	0.352703	0.793969
Ip6k1	chr9	107997678	107999679	1.15829	0.640934	0.548372	0.470529	0.899611	0.50945	0.793919
Ifna9	chr4	88591813	88592385	0.396759	0.466532	0.273707	0.205497	0.431645	0.239602	0.793554
Try10	chr6	41354105	41357944	0.284178	0.111384	0.163369	0.045996	0.197781	0.104683	0.793537
Muc5ac	chr7	141788972	141808121	1.15868	0.672844	0.472277	0.565691	0.91576	0.518984	0.793319
Ccl2	chr11	82028224	82038562	0.760814	0.455061	0.409568	0.273334	0.607938	0.341451	0.792971
Gm1965	chr6	89141005	89147353	0.830737	0.429468	0.337597	0.370924	0.630103	0.35426	0.792904
Gm1965	chr6	89141005	89147385	0.826571	0.427314	0.335904	0.369064	0.626943	0.352484	0.792716
1700012A03Rik	chr6	32058141	32058621	1.51247	0.333459	0.434745	0.612005	0.922963	0.523375	0.792684
Gm10126	chr13	73988963	73989148	1.22227	2.58699	0.281065	1.89919	1.90463	1.09013	0.792599
Ifng	chr10	118441047	118445892	0.816294	0.52957	0.442303	0.315879	0.672932	0.379091	0.792496
Olfr1229	chr2	89282139	89283157	0.490828	0.419741	0.102607	0.40444	0.455285	0.253523	0.792003
Ccdc106	chr7	5056725	5058168	0.440831	0.407278	0.144815	0.326177	0.424055	0.235496	0.79195
Olfr1331	chr4	118864658	118869736	0.966844	0.46317	0.401427	0.405714	0.715007	0.40357	0.791841
Gm10974	chr7	66266190	66269800	0.868825	0.251702	0.188207	0.440217	0.560264	0.314212	0.791742
Apob	chr12	7977648	7987818	1.09078	0.494117	0.508852	0.38783	0.792449	0.448341	0.791715
Ftcd	chr10	76575652	76590338	0.761575	0.462313	0.327472	0.360778	0.611944	0.344125	0.791497
Orm2	chr4	63379924	63381203	0.426267	0.835384	0.204211	0.505956	0.630826	0.355084	0.791298
B3galnt1	chr3	69548979	69553099	0.761303	0.869237	0.380573	0.542889	0.81527	0.461731	0.79108
Olfr1420	chr19	11895999	11897050	2.20427	1.82959	0.74541	1.56701	2.01693	1.15621	0.791046
Insc	chr7	114771321	114791191	0.951885	0.713004	0.460403	0.482946	0.832445	0.471674	0.791028
Apol6	chr15	77045075	77052348	0.881367	0.588007	0.474341	0.356131	0.734687	0.415236	0.790829
Gm9874	chr17	30485511	30485963	0.50186	0.35407	0.346213	0.129967	0.427965	0.23809	0.789998
Slc11a1	chr1	74375253	74381826	0.788472	0.650618	0.437374	0.37614	0.719545	0.406757	0.789882
1700014D04Rik	chr13	59740842	59744921	1.19243	0.327601	0.499717	0.360753	0.760018	0.430235	0.789656
Pate2	chr9	35685079	35687371	1.26907	0.606227	0.706769	0.359463	0.93765	0.533116	0.789327
Krt9	chr11	100186781	100193246	0.921184	0.446503	0.371914	0.400634	0.683843	0.386274	0.789278
Fuom	chr7	140101279	140102330	0.216105	0.203287	0	0.223859	0.209696	0.11193	0.789117
Fcrlb	chr1	170917875	170922399	1.07517	0.815261	0.346595	0.728618	0.945214	0.537607	0.789027
Gm14192	chr11	99696249	99696398	2.72811	1.06929	1.39408	0.784999	1.8987	1.08954	0.788871
Olfr123	chr17	37795435	37796375	1.06303	0.397717	0.388891	0.437964	0.730372	0.413428	0.788489
Cxcl16	chr11	70459940	70460862	0.689663	0.810947	0.339836	0.510292	0.750305	0.425064	0.788171
B3gat1	chr9	26733824	26763095	1.00033	0.60091	0.512566	0.396227	0.800621	0.454396	0.787564
Hrh2	chr13	54192129	54222432	0.993274	0.610439	0.483034	0.427418	0.801856	0.455226	0.787209
Olfr1239	chr2	89417494	89418411	0.74295	0.407682	0.455583	0.192402	0.575316	0.323992	0.787045
Lcn5	chr2	25657952	25661501	1.31923	0.572297	0.530144	0.547288	0.945762	0.538716	0.786942
Olfr1294	chr2	111537349	111538290	0.579217	0.79459	0.277485	0.499999	0.686903	0.388742	0.786751
Olfr599	chr7	103338012	103339061	0.866067	0.712861	0.448098	0.448571	0.789464	0.448334	0.786299
Trim11	chr11	58994259	59035064	0.907008	0.437611	0.395872	0.365029	0.67231	0.38045	0.786132
Krt13	chr11	100117327	100121566	1.05092	0.680916	0.332903	0.652623	0.86592	0.492763	0.78602
Krtdap	chr7	30776405	30781066	0.8095	0.596344	0.493401	0.303088	0.702922	0.398245	0.785981
Ces2b	chr8	104831601	104838649	0.883698	0.599191	0.281823	0.5596	0.741445	0.420711	0.785563
Sult2b1	chr7	45758474	45759530	0.731282	0.303488	0.247295	0.3342	0.517385	0.290747	0.785472
Fbxw5	chr2	25503038	25503800	0.774693	0.350357	0.479616	0.154325	0.562525	0.31697	0.785321
Trpv1	chr11	73240310	73254884	1.017	0.572245	0.459115	0.444339	0.794621	0.451727	0.785042
Epha2	chr4	141278439	141279794	0.905347	0.473138	0.346979	0.434181	0.689242	0.39058	0.785013
Krtap13-1	chr16	88728862	88729609	0.668655	0.64329	0.349453	0.393549	0.655972	0.371501	0.784147
Scgb3a1	chr11	49663610	49665118	1.6271	1.24007	0.866105	0.780317	1.43359	0.823211	0.78388
Scgb3a1	chr11	49663610	49665118	1.6271	1.24007	0.866105	0.780317	1.43359	0.823211	0.78388
Ecel1	chr1	87147882	87148916	0.527171	0.516566	0.303062	0.28442	0.521869	0.293741	0.783608
Olfr122	chr17	37771628	37772620	0.686836	0.592256	0.368526	0.35574	0.639546	0.362133	0.783483
Cldn4	chr5	134940462	134941232	1.7692	1.10951	0.813667	0.839979	1.43936	0.826823	0.783432
Olfr402	chr11	74155127	74156126	1.22765	0.481181	0.679615	0.294375	0.854416	0.486995	0.783394
Rhod	chr19	4447717	4452151	0.635637	0.325489	0.24754	0.292051	0.480563	0.269796	0.78335
Gm1965	chr6	89141008	89146674	0.890596	0.424546	0.35055	0.394785	0.657571	0.372668	0.783247
Gm1965	chr6	89141005	89146674	0.890125	0.424322	0.350365	0.394576	0.657223	0.37247	0.783229
Tnf	chr17	35199507	35202004	0.928301	0.94173	0.502272	0.565652	0.935015	0.533962	0.783027
Serpina1a	chr12	103853591	103863551	0.260185	0.144919	0.110214	0.10639	0.202552	0.108302	0.782928
Serpina1a	chr12	103853589	103863555	0.260029	0.144832	0.110148	0.106326	0.20243	0.108237	0.782859
Vpreb1	chr16	16868403	16869255	0.586347	0.250713	0.122575	0.345105	0.41853	0.23384	0.78284
Efemp2	chr19	5474777	5475468	0.394236	0.0772609	0	0.255238	0.235748	0.127619	0.782674
Spata3	chr1	86021946	86029958	1.1065	0.92744	0.443643	0.720048	1.01697	0.581845	0.782401
Spata3	chr1	86021942	86029958	1.10595	0.926977	0.443422	0.719688	1.01646	0.581555	0.782389
Olfr1179	chr2	88402009	88402932	0.984167	0.752207	0.226312	0.764609	0.868187	0.495461	0.782068
Foxi1	chr11	34230559	34231670	0.613334	0.288478	0.188051	0.31767	0.450906	0.252861	0.781725
Clec4e	chr6	123283491	123289870	0.734053	0.494421	0.409703	0.286069	0.614237	0.347886	0.781642
Il24	chr1	130878158	130880779	0.658964	0.183517	0.179444	0.291905	0.42124	0.235674	0.781317
Olfr600	chr7	103345982	103346929	0.719439	0.451178	0.165437	0.496835	0.585308	0.331136	0.781313
Tas2r109	chr6	132980015	132980965	0.191245	0.337316	0.164915	0.123817	0.26428	0.144366	0.781163
Serpinb6e	chr13	33832345	33843408	0.994521	0.58954	0.477231	0.425704	0.792031	0.451468	0.781147
Sla	chr15	66688836	66850607	0.862028	0.592574	0.429479	0.398148	0.727301	0.413813	0.781107
Muc2	chr7	141699186	141701375	1.53638	0.927695	0.716138	0.698972	1.23204	0.707555	0.781055
Spata3	chr1	86021953	86029921	1.11261	0.919142	0.439532	0.724023	1.01587	0.581778	0.781014
Mx1	chr16	97448131	97457492	0.636229	0.645321	0.318292	0.408766	0.640775	0.363529	0.780846
Mx1	chr16	97448131	97457492	0.636229	0.645321	0.318292	0.408766	0.640775	0.363529	0.780846
Bcl2l10	chr9	75347758	75351632	0.598425	0.593284	0.310296	0.364645	0.595854	0.33747	0.780489
Grifin	chr5	140563119	140565071	1.23391	0.68439	0.615666	0.482334	0.959152	0.549	0.780413
Ces2a	chr8	104734018	104741634	0.793923	0.547491	0.391211	0.371012	0.670707	0.381111	0.780253
Ces2a	chr8	104734003	104741630	0.792778	0.546701	0.390647	0.370477	0.66974	0.380562	0.780203
Lao1	chr4	118961578	118968912	1.45053	0.77263	0.570177	0.706339	1.11158	0.638258	0.77927
Tssc4	chr7	143080716	143081922	0.941767	0.531545	0.303187	0.536557	0.736656	0.419872	0.779041
Ighv1-73	chr12	115790702	115790884	0	0.584312	0	0.321721	0.292156	0.16086	0.77885
Gm5316	chr6	122900136	122900405	2.18923	1.58413	0	2.18055	1.88668	1.09028	0.778749
Lamp5	chr2	135983029	135988196	0.633462	0.393122	0.192199	0.387335	0.513292	0.289767	0.778747
Slco2b1	chr7	99688879	99695628	1.10472	0.491082	0.449205	0.462277	0.797899	0.455741	0.778486
Kif6	chr17	49753911	49759033	0.763282	0.626171	0.469411	0.321784	0.694726	0.395597	0.778472
Taar4	chr10	23960494	23961537	2.04695	2.09966	1.10165	1.29705	2.07331	1.19935	0.778399
Ccl22	chr8	94745590	94751699	1.06416	0.498769	0.410695	0.481791	0.781463	0.446243	0.778219
Lao1	chr4	118965375	118968083	1.22525	0.789436	0.482448	0.673726	1.00734	0.578087	0.777885
Lcp1	chr14	75174947	75178023	0.679738	0.729773	0.305819	0.497481	0.704755	0.40165	0.77775
Olfr366	chr2	37219491	37220420	1.22227	0.689865	0.337278	0.759676	0.956069	0.548477	0.777124
Sestd1	chr2	77314751	77317035	0.716353	0.467961	0.38894	0.283424	0.592157	0.336182	0.776883
Slc22a26	chr19	7781980	7802667	0.93847	0.578889	0.573624	0.293122	0.758679	0.433373	0.776869
Gm10855	chr2	6932541	6935081	0.608394	0.252489	0.205738	0.27804	0.430442	0.241889	0.776377
Olfr657	chr7	104635676	104636636	0.851648	0.333806	0.489597	0.183793	0.592727	0.336695	0.776132
Parvg	chr15	84326119	84328926	1.24682	0.894884	0.539909	0.691906	1.07085	0.615908	0.776085
Olfr1099	chr2	86958448	86959478	0.793825	0.259285	0.253531	0.342628	0.526555	0.29808	0.776018
Tnni3	chr7	4521341	4522492	1.22355	0.324871	0.272282	0.61328	0.774208	0.442781	0.77577
Stra8	chr6	34947503	34948577	0.845926	0.696283	0.389046	0.492906	0.771104	0.440976	0.775744
D17H6S56E-5	chr17	34999047	35000794	0.416188	0.672895	0.179444	0.437857	0.544541	0.308651	0.775713
Try4	chr6	41302269	41305532	0.654725	0.409502	0.368381	0.23449	0.532113	0.301435	0.775509
Rasgrp2	chr19	6397495	6398291	0.285248	0.60374	0.131187	0.369353	0.444494	0.25027	0.775396
C86695	chr8	21958714	21964303	0.89473	0.679067	0.374083	0.526609	0.786898	0.450346	0.77529
Trim29	chr9	43310763	43336125	0.973442	0.548073	0.424606	0.445688	0.760758	0.435147	0.77505
Clec4e	chr6	123283694	123289866	0.743937	0.50234	0.423442	0.286125	0.623138	0.354783	0.774827
3100002H09Rik	chr4	124293693	124299848	0.709061	0.416878	0.314212	0.32517	0.562969	0.319691	0.774501
Cntnap4	chr8	112731399	112733519	0.600245	0.201658	0.172535	0.277581	0.400951	0.225058	0.774004
Olfr549	chr7	102554286	102555236	1.09966	0.730851	0.494746	0.557176	0.915255	0.525961	0.773622
Olfr384	chr11	73602582	73603520	0.387378	0.227751	0.278371	0.0626996	0.307565	0.170535	0.773291
Sla	chr15	66670753	66850721	0.850661	0.578408	0.421202	0.396166	0.714534	0.408684	0.77316
Olfr569	chr7	102887207	102888151	1.44345	0.622339	0.442566	0.747618	1.03289	0.595092	0.772859
Gm525	chr11	89124456	89126706	0.908967	0.64129	0.418039	0.47079	0.775128	0.444415	0.772286
Olfr1384	chr11	49513618	49514651	1.9788	1.29266	1.21342	0.683268	1.63573	0.948343	0.772205
Cym	chr3	107211293	107221732	0.971215	0.629898	0.495741	0.422952	0.800557	0.459346	0.772151
Ubash3a	chr17	31208089	31213897	1.05668	0.708688	0.54897	0.466216	0.882684	0.507593	0.771713
Gm46	chr12	103668897	103675464	1.17687	0.927978	0.533288	0.681257	1.05242	0.607272	0.771104
Chrna4	chr2	181018380	181039187	1.09694	0.626939	0.484894	0.506469	0.861941	0.495682	0.771033
Atp1a2	chr1	172284309	172298064	1.18993	0.77344	0.528254	0.603472	0.981685	0.565863	0.771004
Olfr656	chr7	104617657	104618647	0.825866	0.917152	0.527529	0.475277	0.871509	0.501403	0.77071
Ces1f	chr8	93256588	93258739	0.866268	0.596259	0.510149	0.328299	0.731264	0.419224	0.770633
Ccl8	chr11	82115185	82116799	1.01354	0.496575	0.356074	0.510371	0.755057	0.433222	0.770465
2001-09-01	chr7	127214643	127218303	0.558887	0.423511	0.299874	0.257306	0.491199	0.27859	0.770217
B020004C17Rik	chr14	57015134	57018982	1.02774	0.319482	0.434632	0.336516	0.67361	0.385574	0.770106
Cpeb4	chr11	31818110	31824473	0.957383	0.621681	0.435377	0.471813	0.789532	0.453595	0.769957
Defa-rs1	chr8	21325887	21327020	0.240574	0.282881	0.184403	0.103836	0.261728	0.144119	0.769522
Gm7964	chr7	83755904	83757356	0.250343	0.625532	0.251856	0.243117	0.437937	0.247487	0.769517
Gm7964	chr7	83755904	83757356	0.250343	0.625532	0.251856	0.243117	0.437937	0.247487	0.769517
Ankrd13d	chr19	4280646	4283033	0.304647	0.156722	0.153244	0.098618	0.230684	0.125931	0.769286
2010005H15Rik	chr16	36253046	36257372	0.325751	0.247121	0.181228	0.136064	0.286436	0.158646	0.769243
Gm1043	chr5	37185897	37193023	1.49286	0.832688	0.726187	0.619562	1.16278	0.672874	0.769121
Ccdc42	chr11	68594055	68597954	1.32908	0.699152	0.522781	0.649134	1.01412	0.585957	0.768363
Smek1	chr12	101145614	101149282	0.941839	0.568307	0.370464	0.497444	0.755073	0.433954	0.768116
Hcls1	chr16	36954751	36956633	1.49711	1.53324	0.666317	1.09433	1.51517	0.880323	0.768032
Mup4	chr4	59956804	59960710	0.442233	0.410529	0.240851	0.241105	0.426381	0.240978	0.76796
Sp100	chr1	85635384	85642890	0.472432	0.320488	0.188026	0.258808	0.39646	0.223417	0.767901
Gdf2	chr14	33941039	33947198	0.664313	0.477362	0.364928	0.286729	0.570838	0.325828	0.767881
Krt5	chr15	101707070	101712891	1.1168	0.523442	0.44897	0.495512	0.82012	0.472241	0.767838
Chrna9	chr5	65975896	65977140	1.02259	1.03064	0.335924	0.851204	1.02661	0.593564	0.76772
Klk1b26	chr7	44012678	44016965	1.00735	0.673294	0.377943	0.590397	0.840321	0.48417	0.767649
Olfr102	chr17	37313411	37314437	0.398458	0.208236	0.0509037	0.286635	0.303347	0.16877	0.767616
Ifitm1	chr7	140968028	140969825	0.682787	0.624447	0.290757	0.458425	0.653617	0.374591	0.767325
Olfr870	chr9	20170634	20171569	0.485775	0.342721	0.279263	0.188702	0.414248	0.233983	0.767196
BC025446	chr15	75235649	75238768	1.13671	0.856804	0.586453	0.566105	0.996758	0.576279	0.767103
Abca1	chr4	53262732	53263831	0.992041	0.486041	0.475256	0.374659	0.739041	0.424957	0.766732
BC027072	chr17	71743557	71752885	0.735958	0.395439	0.280191	0.366036	0.565698	0.323113	0.766568
Actl7b	chr4	56740007	56741425	0.512682	0.452132	0.257891	0.290433	0.482407	0.274162	0.766526
Cd93	chr2	148436640	148443563	0.742048	0.440133	0.302011	0.374133	0.591091	0.338072	0.766432
Adamts8	chr9	30942562	30962856	0.869268	0.476821	0.383811	0.388728	0.673044	0.386269	0.766362
1700012A03Rik	chr6	32112143	32113226	1.09057	0.591859	0.48227	0.488814	0.841216	0.485542	0.765183
C1s	chr6	124540321	124542303	0.458583	0.593152	0.184542	0.415658	0.525868	0.3001	0.764708
A530084C06Rik	chr13	31564749	31573562	0.851181	0.430677	0.415188	0.320626	0.640929	0.367907	0.764382
Plcd3	chr11	103070585	103071750	1.13086	0.596089	0.49319	0.504931	0.863476	0.49906	0.76399
Megf11	chr9	64501336	64509072	0.834501	0.532089	0.344602	0.441353	0.683295	0.392977	0.76392
Gmppa	chr1	75441620	75442932	0.761849	0.732949	0.27871	0.58292	0.747399	0.430815	0.763634
Sla	chr15	66705290	66850607	0.842612	0.583512	0.422706	0.398663	0.713062	0.410685	0.763311
Tas2r124	chr6	132754730	132755659	0.195564	0.229955	0.168639	0.0633064	0.212759	0.115973	0.762876
Gm9898	chr1	30718554	30719961	1.45318	0.721468	0.594069	0.669033	1.08733	0.631551	0.762474
A1bg	chr15	60917589	60921270	0.963212	0.421095	0.397552	0.399748	0.692153	0.39865	0.762308
Psg16	chr7	17087934	17093907	1.27105	0.635417	0.612566	0.49276	0.953233	0.552663	0.762071
Tssk1	chr16	17894203	17895651	0.533447	0.332078	0.28863	0.203157	0.432763	0.245894	0.761362
Wisp1	chr15	66909311	66919235	1.05826	0.619489	0.437187	0.533878	0.838874	0.485533	0.761193
Ceacam3	chr7	17150282	17164253	1.01208	0.397961	0.501379	0.31182	0.705018	0.406599	0.761045
1700008A04Rik	chr11	32903137	32926160	0.949894	0.513189	0.438224	0.406581	0.731542	0.422402	0.760536
Rps24	chr14	24622138	24622860	1.57222	0.665534	0.650765	0.651451	1.11888	0.651108	0.76038
Rsad2	chr12	26450626	26454842	0.495981	0.418385	0.185955	0.335072	0.457183	0.260513	0.760224
Glis3	chr19	28262426	28300378	0.924873	0.538125	0.446292	0.398673	0.731499	0.422483	0.760185
Osm	chr11	4236420	4239664	1.03688	0.428375	0.338318	0.508012	0.732627	0.423165	0.760132
Fam64a	chr11	72042502	72043664	0.508247	0.275827	0.0899022	0.354363	0.392037	0.222133	0.759716
Gtsf1l	chr2	163152895	163156106	0.84935	0.715746	0.374345	0.531561	0.782548	0.452953	0.759156
Slc6a12	chr6	121358965	121363856	1.05957	0.863389	0.491577	0.625817	0.961479	0.558697	0.759096
Kcnt1	chr2	25877881	25918273	1.07725	0.510913	0.508635	0.41103	0.794082	0.459832	0.758957
Kcnt1	chr2	25877875	25918273	1.07709	0.510837	0.50856	0.410969	0.793964	0.459764	0.758953
Kcnt1	chr2	25877873	25918273	1.07704	0.510812	0.508534	0.410948	0.793925	0.459741	0.758951
Slc34a2	chr5	53058156	53070772	1.18563	0.826313	0.563511	0.606621	1.00597	0.585066	0.758903
Ptpn5	chr7	47112719	47133416	1.08959	0.87308	0.515254	0.625784	0.981337	0.570519	0.758873
1700015E13Rik	chr1	170317499	170320780	0.872796	0.6679	0.605292	0.28702	0.770348	0.446156	0.757855
Olfr458	chr6	42460076	42461017	0.772289	0.737834	0.499472	0.374999	0.755061	0.437236	0.757467
Capn5	chr7	98161998	98165441	0.554494	0.279431	0.166974	0.307709	0.416963	0.237341	0.756871
Pilrb2	chr5	137865829	137871758	0.398712	0.225399	0.132238	0.218423	0.312055	0.175331	0.756318
Spag8	chr4	43644136	43648178	1.00091	0.489287	0.310333	0.553363	0.745101	0.431848	0.755822
Zfp64	chr2	168986566	168987373	1.68819	0.926366	0.582306	0.947245	1.30728	0.764775	0.755818
Opn4	chr14	34592343	34600142	1.21249	0.5415	0.589804	0.43024	0.876997	0.510022	0.755643
Echdc3	chr2	6255946	6257266	0.963754	0.647565	0.356172	0.57939	0.805659	0.467781	0.75561
Chrna3	chr9	55011343	55026559	0.830666	0.685128	0.391648	0.487497	0.757897	0.439572	0.755351
Acaa1b	chr9	119169668	119173652	1.24368	1.11357	0.669055	0.709158	1.17862	0.689107	0.754742
Oxct2b	chr4	123116248	123118000	0.752189	0.0914967	0.178932	0.302267	0.421843	0.2406	0.754736
Krt71	chr15	101733950	101743109	0.977871	0.630368	0.439456	0.494909	0.80412	0.467182	0.754662
Olfr649	chr7	104189267	104190205	1.69478	0.967942	1.05781	0.501597	1.33136	0.779704	0.754602
Lrp3	chr7	35200951	35204898	0.760112	0.419808	0.39725	0.283339	0.58996	0.340295	0.754491
Glis3	chr19	28262426	28300425	0.926122	0.538866	0.449867	0.39973	0.732494	0.424798	0.754439
Olfr960	chr9	39623105	39624171	0.809655	0.400859	0.146986	0.55178	0.605257	0.349383	0.754407
Krt74	chr15	101754259	101763504	1.02287	0.543551	0.508872	0.401159	0.78321	0.455016	0.753961
Ncf4	chr15	78260878	78262575	0.776553	0.566762	0.431033	0.346731	0.671658	0.388882	0.753911
Mat1a	chr14	41105381	41124412	0.977124	0.598358	0.466965	0.448553	0.787741	0.457759	0.753786
Olfr790	chr10	129500813	129501882	0.722397	0.349768	0.342006	0.275116	0.536083	0.308561	0.753573
Adck3	chr1	180179136	180182800	0.595495	0.145879	0.228226	0.192769	0.370687	0.210498	0.753324
Gm10764	chr10	87290733	87291110	1.20287	1.13152	0.276604	1.09028	1.1672	0.68344	0.752442
2010109I03Rik	chr15	74878336	74881704	0.958227	0.491956	0.387935	0.454363	0.725092	0.421149	0.751966
Olfr1431	chr19	12209568	12210506	0.774757	1.30957	0.278371	0.940494	1.04216	0.609433	0.751945
Krt17	chr11	100262882	100265978	1.0277	0.500637	0.337605	0.551299	0.76417	0.444452	0.751653
Prss2	chr6	41521787	41525079	0.690382	0.568254	0.317511	0.411213	0.629318	0.364362	0.751647
Slc39a12	chr2	14388512	14389539	0.663451	0.364058	0.305125	0.286357	0.513755	0.295741	0.751576
Ighg2c	chr12	113364447	113369716	0.880036	0.578269	0.367038	0.480384	0.729153	0.423711	0.751465
Vmn1r200	chr13	22394947	22396009	0.898249	0.603551	0.540978	0.332314	0.7509	0.436646	0.75141
Serpina1a	chr12	103857764	103863562	0.31363	0.165953	0.14424	0.121831	0.239792	0.133036	0.751409
Klf4	chr4	55605149	55636901	0.93506	0.671822	0.474163	0.461684	0.803441	0.467924	0.751206
Chic2	chr5	75011180	75011509	0.551134	0.648055	0.158419	0.535227	0.599594	0.346823	0.751184
Tnni3	chr7	4520477	4524229	0.787491	0.470112	0.195016	0.533373	0.628802	0.364194	0.751111
Parvg	chr15	84324762	84328876	1.13809	0.714593	0.495467	0.586603	0.926344	0.541035	0.75096
Olfr1314	chr2	112091761	112092699	0.774757	0.967942	0.38972	0.626996	0.871349	0.508358	0.750958
Tmprss13	chr9	45319100	45347581	0.857264	0.625086	0.376273	0.485767	0.741175	0.43102	0.750916
Parvg	chr15	84324734	84328890	1.1266	0.707373	0.490461	0.580676	0.916984	0.535569	0.750709
Ccl3	chr11	83647844	83649355	2.01481	0.919364	1.14099	0.584077	1.46709	0.862534	0.750655
Olfr586	chr7	103121829	103122782	0.667253	0.44834	0.273994	0.370283	0.557797	0.322138	0.750539
Vmn1r33	chr6	66611582	66612617	0.219443	0.258034	0.151384	0.113658	0.238738	0.132521	0.750282
B3gnt3	chr8	71709637	71711106	1.08258	0.400075	0.462323	0.40051	0.741329	0.431417	0.749919
Adamtsl2	chr2	27103786	27107406	0.941767	0.620136	0.389812	0.520298	0.780952	0.455055	0.749679
Edar	chr10	58703995	58704279	1.43585	0.562785	0.550296	0.619736	0.999317	0.585016	0.749456
Ces2b	chr8	104831572	104840093	0.784308	0.526992	0.263783	0.497418	0.65565	0.3806	0.749431
Trip6	chr5	137321021	137322512	0.243799	0.215005	0.175195	0.0789208	0.229402	0.127058	0.749369
Ptpn5	chr7	47112737	47133577	1.07993	0.869655	0.514227	0.62714	0.974795	0.570684	0.748825
Tpo	chr12	30116618	30131899	0.79738	0.447812	0.352352	0.369846	0.622596	0.361099	0.748807
Pak6	chr2	118663762	118664956	0.989273	0.402662	0.612463	0.197071	0.695968	0.404767	0.74879
Tnf	chr17	35199381	35202007	0.951949	0.936189	0.477607	0.627521	0.944069	0.552564	0.748402
Hdgfl1	chr13	26492514	26493219	0.322015	0.378644	0.148097	0.250177	0.35033	0.199137	0.748379
Mpdz	chr4	81930478	81932374	0.479373	0.507307	0.413375	0.155179	0.49334	0.284277	0.74833
Arap1	chr7	101382828	101385617	1.18968	0.32577	0.356016	0.527553	0.757724	0.441784	0.747941
Aplf	chr6	87672382	87679286	0.849448	0.557487	0.333126	0.486006	0.703468	0.409566	0.747635
Oprl1	chr2	181715348	181720972	1.16399	0.627317	0.483282	0.565199	0.895656	0.524241	0.747065
Aplf	chr6	87672430	87680237	0.815266	0.513556	0.328077	0.44488	0.664411	0.386478	0.747002
Olfr509	chr7	108645584	108646658	1.60726	0.547079	0.826724	0.438139	1.07717	0.632431	0.74697
Wap	chr11	6635482	6638637	0.619502	0.542099	0.281599	0.391753	0.5808	0.336676	0.746935
AF251705	chr11	114996722	115001880	0.652194	0.476714	0.334402	0.319538	0.564454	0.32697	0.746791
AF251705	chr11	114996721	115001880	0.652068	0.476622	0.334337	0.319476	0.564345	0.326907	0.746783
Nt5c3b	chr11	100429882	100431544	1.12099	0.803737	0.597284	0.531043	0.962364	0.564164	0.74662
Itln1	chr1	171529152	171531733	1.14464	0.662613	0.465684	0.592854	0.903625	0.529269	0.746315
Olfr225	chr11	59612966	59614225	1.19084	0.424322	0.663849	0.280357	0.807582	0.472103	0.746053
Bdkrb1	chr12	105604091	105605428	0.917526	0.359627	0.390718	0.352017	0.638577	0.371368	0.745934
Olfr46	chr7	140610168	140611124	0.855207	0.391068	0.109254	0.615203	0.623138	0.362229	0.745675
Grm6	chr11	50856824	50866208	0.978651	0.695011	0.540328	0.439131	0.836831	0.489729	0.745512
Hip1r	chr5	123994805	123997399	0.297867	0.185426	0.201457	0.0680635	0.241647	0.13476	0.745191
Prss29	chr17	25318654	25322681	0.891761	0.345104	0.324467	0.394643	0.618432	0.359555	0.745158
Fer1l4	chr2	156035003	156037363	1.40585	0.769926	0.730698	0.548602	1.08789	0.63965	0.745119
Il12b	chr11	44265563	44267209	0.911027	0.616774	0.571345	0.321721	0.7639	0.446533	0.744552
Stab1	chr14	31156637	31161829	1.16451	0.628026	0.473151	0.578205	0.896269	0.525678	0.744175
Tppp2	chr14	51918761	51920699	0.398641	0.468745	0.134807	0.364363	0.433693	0.249585	0.743792
Rcvrn	chr11	67695326	67703333	1.06177	0.781138	0.515731	0.566105	0.921452	0.540918	0.743636
Arid5a	chr1	36317027	36318132	0.863327	0.435064	0.330874	0.425858	0.649195	0.378366	0.743455
Ccdc33	chr9	58111789	58118807	0.427543	0.198045	0.178754	0.176147	0.312794	0.17745	0.743309
Parvg	chr15	84324795	84330095	1.08075	0.635402	0.473373	0.533106	0.858074	0.50324	0.74315
Nlrx1	chr9	44275095	44279600	0.857706	0.427147	0.278445	0.470372	0.642427	0.374409	0.743134
Olfr263	chr13	21132698	21133784	0.501952	0.737781	0.288564	0.433302	0.619867	0.360933	0.743126
Olfr218	chr1	173203358	173204299	1.30324	1.19188	0.221988	1.25	1.24756	0.735993	0.743033
Gm10471	chr5	26082574	26089291	0.297799	0.175085	0.132291	0.131456	0.236442	0.131873	0.742971
Cytl1	chr5	37735519	37739820	0.919517	0.45983	0.230889	0.57479	0.689673	0.402839	0.742423
Olfr748	chr14	50710332	50711255	0.934959	0.694345	0.509202	0.446022	0.814652	0.477612	0.742219
Rgs3	chr4	62700695	62702524	0.621155	0.175294	0.199971	0.257377	0.398224	0.228674	0.742159
Kcnt1	chr2	25863854	25916117	1.017	0.531945	0.494133	0.413422	0.774475	0.453778	0.741646
Foxi1	chr11	34141827	34143421	1.2258	1.30728	0.721077	0.775156	1.26654	0.748117	0.74154
Fuom	chr7	140099472	140099968	1.00635	0.322724	0.420749	0.355382	0.664535	0.388066	0.741508
Vldlr	chr19	27217020	27234856	0.764734	0.512555	0.372222	0.372981	0.638644	0.372602	0.741427
Ppm1h	chr10	122811244	122815871	0.599304	0.369677	0.293697	0.267151	0.484491	0.280424	0.741283
Dlec1	chr9	119128521	119130240	0.370093	0.373009	0.151971	0.273837	0.371551	0.212904	0.741014
Rp1l1	chr14	63992431	64033504	1.0605	0.632609	0.492565	0.501685	0.846553	0.497125	0.740961
Gm20425	chr9	103222097	103230266	0.790273	0.464625	0.307142	0.425168	0.627449	0.366155	0.740469
Slc13a5	chr11	72241994	72266602	1.06054	0.662631	0.412124	0.600496	0.861588	0.50631	0.740434
Lelp1	chr3	92134994	92142754	0.960809	0.606221	0.410896	0.508262	0.783515	0.459579	0.740433
Vdac3-ps1	chr13	18030324	18031629	0.382966	0.409376	0.320233	0.135241	0.396171	0.227737	0.740393
Mup18	chr4	61670177	61674136	0.195193	0.310526	0.105612	0.178409	0.25286	0.142011	0.73986
Mesdc2	chr7	83934783	83944340	1.02754	0.592932	0.415687	0.535899	0.810235	0.475793	0.739778
Nr2e3	chr9	59948718	59950074	0.938186	0.275794	0.231149	0.477247	0.60699	0.354198	0.739325
Scgb2b26	chr7	33943002	33945040	1.02577	0.445756	0.256391	0.606363	0.735765	0.431377	0.739194
Foxq1	chr13	31361020	31366316	0.901302	0.746909	0.602032	0.366787	0.824105	0.48441	0.738871
Itgb2l	chr16	96422292	96443614	1.06832	0.566665	0.546734	0.414165	0.817491	0.48045	0.738862
Itgb2l	chr16	96422288	96443619	1.06787	0.566426	0.546504	0.41399	0.817146	0.480247	0.73885
Trim15	chr17	36861318	36866746	0.854262	0.541638	0.394806	0.422936	0.69795	0.408871	0.738682
Neu2	chr1	87594550	87597821	1.04222	0.686281	0.4953	0.521813	0.86425	0.508557	0.738615
Olfr328	chr11	58551305	58554642	0.64021	0.384407	0.454184	0.141102	0.512308	0.297643	0.738568
Neu2	chr1	87594550	87597827	1.04031	0.685025	0.494393	0.520858	0.862668	0.507626	0.738567
Cyp4f15	chr17	32685668	32690902	1.03357	0.408516	0.339533	0.506088	0.721045	0.422811	0.738352
Disp2	chr2	118777282	118778035	0.422122	0	0	0.23425	0.211061	0.117125	0.738228
Trim30c	chr7	104411345	104412623	0.497701	0.752433	0.408742	0.322224	0.625067	0.365483	0.737569
Etnk1	chr6	143245888	143249112	0.986914	0.480767	0.405257	0.456395	0.73384	0.430826	0.737222
Cd79b	chr11	106311344	106314529	1.08462	0.704806	0.574304	0.480461	0.894714	0.527383	0.737089
H2-M10.2	chr17	36284227	36286490	0.823414	0.401456	0.300183	0.416077	0.612435	0.35813	0.736695
Ftcd	chr10	76575648	76589561	0.7516	0.449573	0.338151	0.363896	0.600586	0.351023	0.73668
Gpr35	chr1	92978903	92986391	0.79535	0.549709	0.356013	0.432384	0.67253	0.394198	0.736678
Sp100	chr1	85632478	85644942	0.404894	0.253061	0.163566	0.212545	0.328978	0.188055	0.736466
Dll1	chr17	15367525	15368390	0.315024	0.370424	0.120735	0.27194	0.342724	0.196337	0.736248
Trim11	chr11	59012141	59035037	0.980978	0.520706	0.481752	0.401122	0.750842	0.441437	0.735904
Drd2	chr9	49340662	49407214	0.963985	0.612144	0.43753	0.490086	0.788064	0.463808	0.735841
Ctla4	chr1	60909171	60914724	1.18706	0.981884	0.574174	0.71023	1.08447	0.642202	0.734932
Ctla4	chr1	60909171	60914769	1.17752	0.973993	0.56956	0.704522	1.07576	0.637041	0.734763
Gm806	chr13	50467307	50475355	1.24277	0.717378	0.610528	0.548592	0.980075	0.57956	0.734724
Cdh26	chr2	178460630	178466572	0.535554	0.485796	0.307881	0.287291	0.510675	0.297586	0.734238
C77080	chr4	129263730	129265010	0.496924	0.459102	0.326483	0.229801	0.478013	0.278142	0.733286
Sox9	chr11	112825179	112832469	1.01027	0.432644	0.437384	0.411826	0.721459	0.424605	0.733211
Gimap7	chr6	48718621	48724636	0.91451	0.764287	0.364974	0.626329	0.839399	0.495651	0.732931
Kcnma1	chr14	23292291	23293643	1.91553	0.790311	0.695496	0.913801	1.35292	0.804649	0.732891
Arap1	chr7	101382827	101385593	1.18313	0.328478	0.358975	0.531938	0.755806	0.445457	0.73261
Defb8	chr8	19445769	19447606	0.717403	0.407238	0.369758	0.288289	0.562321	0.329023	0.732572
Mfap4	chr11	61485461	61488075	0.678116	0.449797	0.299874	0.360229	0.563957	0.330052	0.732386
Gm13128	chr4	144330249	144333465	0.395747	0.199433	0.0650023	0.274518	0.29759	0.16976	0.732093
Olfr223	chr11	59589067	59590168	1.11402	0.533675	0.332075	0.641106	0.823848	0.486591	0.732071
Fam64a	chr11	72042455	72047370	0.443956	0.261015	0.202051	0.203595	0.352486	0.202823	0.731996
Eno2	chr6	124766770	124768337	0.637951	0.272778	0.266725	0.262834	0.455365	0.26478	0.731912
Gm21964	chr8	110109772	110111762	1.50724	0.617622	0.787716	0.473128	1.06243	0.630422	0.731633
Itgax	chr7	128129547	128150656	1.12433	0.696483	0.542345	0.53548	0.910406	0.538913	0.731517
Mfsd6l	chr11	68556186	68558244	0.618319	0.493359	0.507801	0.14297	0.555839	0.325385	0.731441
Leprel2	chr6	124854396	124855170	0.586691	0.620879	0.404734	0.303871	0.603785	0.354302	0.731286
Taar5	chr10	23970661	23971782	0.972589	0.85772	0.559124	0.524732	0.915154	0.541928	0.731111
2001-09-01	chr7	127214644	127218232	0.55743	0.41711	0.30589	0.262468	0.48727	0.284179	0.730983
Itgb2l	chr16	96422376	96443612	1.06622	0.561407	0.548948	0.41307	0.813814	0.481009	0.73072
Pih1d3	chr1	31222839	31224287	0.470689	0.368976	0.324709	0.162526	0.419832	0.243617	0.730592
Olfr25	chr9	38329492	38330559	1.10691	0.600725	0.293697	0.716642	0.853819	0.50517	0.73057
H2-M10.4	chr17	36458917	36462334	0.79816	0.359767	0.351784	0.327274	0.578964	0.339529	0.730551
Adamts7	chr9	90188654	90191565	0.624568	0.330481	0.233384	0.323489	0.477525	0.278436	0.730339
Gm10577	chr4	101020298	101020696	1.48143	0.669982	0.393068	0.885337	1.07571	0.639203	0.729884
Fpr-rs4	chr17	18021733	18022704	0.608118	0.605052	0.591625	0.121142	0.606585	0.356383	0.729732
Gm14147	chr2	151104892	151106326	0.443595	0.335318	0.327877	0.123083	0.389457	0.22548	0.729557
Olfr65	chr7	103906342	103907447	1.27443	0.628426	0.756284	0.372626	0.95143	0.564455	0.72942
Pcsk5	chr19	17432832	17837632	0.829731	0.536229	0.474221	0.33088	0.68298	0.40255	0.729384
Traf3ip3	chr1	193198030	193201489	0.946166	0.479018	0.483497	0.357333	0.712592	0.420415	0.72937
Gm12597	chr4	88557673	88558245	0.317407	0.186613	0.182472	0.102749	0.25201	0.14261	0.729343
Aplf	chr6	87672430	87681024	0.767067	0.503854	0.316284	0.431544	0.63546	0.373914	0.729288
Olfr1335	chr4	118808855	118809814	1.56298	1.39231	0.59902	1.16523	1.47764	0.882126	0.728954
Lyzl1	chr18	4165862	4182232	0.833215	0.587846	0.45026	0.3884	0.71053	0.41933	0.728838
Lyzl1	chr18	4165832	4182232	0.831691	0.58677	0.449437	0.387689	0.70923	0.418563	0.72878
Cxcr7	chr1	90203980	90216751	0.772524	0.493957	0.335641	0.410262	0.63324	0.372951	0.727868
Crygd	chr1	65062345	65063301	0.427604	0.0558668	0.273135	0	0.241735	0.136568	0.727817
Tfeb	chr17	47782875	47786377	0.713894	0.473138	0.328324	0.369754	0.593516	0.349039	0.727574
Trim11	chr11	59012142	59029509	0.832508	0.495612	0.427424	0.355934	0.66406	0.391679	0.727442
1700067P10Rik	chr17	48089632	48090920	0.564388	0.33182	0.202786	0.319724	0.448104	0.261255	0.727402
Fadd	chr7	144595442	144608295	0.972759	0.457531	0.451445	0.393904	0.715145	0.422674	0.72697
H1foo	chr6	115966963	115969426	1.01492	0.716043	0.381902	0.645139	0.865483	0.51352	0.726925
Micalcl	chr7	112316029	112347491	1.01015	0.606644	0.385485	0.5726	0.8084	0.479043	0.726891
Trem2	chr17	48346401	48352273	1.16129	0.664552	0.462874	0.62153	0.912923	0.542202	0.726876
Mmp23	chr4	155657624	155658339	1.46058	0.746712	0.657127	0.65782	1.10365	0.657474	0.726802
Gm5174	chr10	86655939	86657381	0.630194	0.592816	0.434745	0.285603	0.611505	0.360174	0.726519
Pip	chr6	41847549	41852062	0.695022	0.42639	0.359021	0.299983	0.560706	0.329502	0.726395
Ceacam12	chr7	18065991	18070427	0.922283	0.554287	0.541986	0.331727	0.738285	0.436857	0.726318
Sh3tc1	chr5	35723068	35729012	0.84895	0.566571	0.430888	0.406034	0.707761	0.418461	0.726135
Map3k8	chr18	4333845	4335048	0.717527	0.355246	0.434204	0.195598	0.536386	0.314901	0.725961
Antxrl	chr14	34053470	34075999	0.892015	0.536307	0.447833	0.397203	0.714161	0.422518	0.725507
Olfr1233	chr2	89339307	89340348	0.52363	0.461786	0.351197	0.226007	0.492708	0.288602	0.725434
Oas2	chr5	120730336	120735575	0.824334	0.653002	0.369139	0.505605	0.738668	0.437372	0.725402
Bpifb9a	chr2	154257854	154271245	0.536442	0.303413	0.199088	0.290154	0.419927	0.244621	0.72522
B430306N03Rik	chr17	48316141	48327024	0.760315	0.486309	0.345831	0.38947	0.623312	0.367651	0.725216
Olfr61	chr7	140637703	140638638	1.31159	0.971044	0.670232	0.691906	1.14132	0.681069	0.725063
Olfr1259	chr2	89943184	89944113	0.635582	1.09229	0.393491	0.633064	0.863934	0.513277	0.725014
Olfr60	chr7	140345052	140345987	0.97155	0.514082	0.502674	0.377403	0.742816	0.440039	0.724897
1810065E05Rik	chr11	58421111	58426024	0.999308	0.892164	0.478737	0.646977	0.945736	0.562857	0.724787
Fcgr2b	chr1	170969260	170976127	0.867265	0.825166	0.45671	0.548631	0.846216	0.50267	0.724698
Sec14l3	chr11	4064841	4077736	1.11415	0.696499	0.510782	0.566105	0.905323	0.538443	0.724683
Olfr965	chr9	39719229	39720167	0.581067	0.854066	0.222697	0.626996	0.717567	0.424846	0.724616
Sla	chr15	66785720	66803749	0.812028	0.649403	0.40883	0.457154	0.730716	0.432992	0.724001
Pla2g2d	chr4	138806185	138809823	0.949604	0.455455	0.330419	0.501545	0.702529	0.415982	0.723817
Tmem92	chr11	94777217	94782703	0.696074	0.584632	0.295357	0.461385	0.640353	0.378371	0.723682
Ces2e	chr8	104926260	104934672	1.11334	0.832504	0.515759	0.643824	0.972921	0.579792	0.7236
Ces2e	chr8	104926260	104934672	1.11334	0.832504	0.515759	0.643824	0.972921	0.579792	0.7236
Atg16l2	chr7	101291575	101292388	0.391007	0.197044	0.192671	0.144656	0.294025	0.168663	0.723594
1700011E24Rik	chr17	87378853	87381769	0.623497	0.421558	0.250906	0.363301	0.522528	0.307104	0.723312
Ky	chr9	102506138	102546238	0.839049	0.546631	0.408046	0.412555	0.69284	0.4103	0.723183
Cypt12	chr3	17948444	17948952	1.07195	0.210077	0.41083	0.347003	0.641013	0.378917	0.723142
S100a8	chr3	90669071	90670034	0.754664	0.776456	0.542304	0.366441	0.76556	0.454373	0.723116
Prss39	chr1	34498430	34503062	0.844009	0.530837	0.394935	0.419355	0.687423	0.407145	0.722746
Opn1sw	chr6	29377384	29380431	0.626535	0.491144	0.291577	0.367002	0.55884	0.32929	0.722495
D17H6S56E-5	chr17	34997641	35000792	0.73569	0.712408	0.298543	0.560358	0.724049	0.42945	0.722379
Serpina3a	chr12	104112724	104121896	0.917004	0.606161	0.410337	0.494208	0.761582	0.452273	0.72215
Gpsm3	chr17	34584568	34585652	0.628597	0.147828	0.289096	0.162788	0.388213	0.225942	0.722129
Vmn1r76	chr7	11930311	11931285	1.16586	0.767696	0.428949	0.724614	0.966778	0.576781	0.721853
Trem2	chr17	48346489	48350558	1.3406	0.73563	0.4881	0.75221	1.03811	0.620155	0.721573
Tnfrsf23	chr7	143688762	143694561	0.768261	0.387157	0.387579	0.294375	0.577709	0.340977	0.721463
Clec4e	chr6	123282145	123289870	0.641479	0.442885	0.372158	0.266713	0.542182	0.319436	0.72144
Clec4e	chr6	123282668	123289870	0.669119	0.452775	0.391923	0.269731	0.560947	0.330827	0.721395
Inmt	chr6	55172763	55175014	0.605709	0.641005	0.371425	0.366007	0.623357	0.368716	0.721253
Adprhl1	chr8	13242262	13243085	1.98649	0.908378	0.951665	0.785952	1.44743	0.868808	0.720874
Vmn1r44	chr6	89893177	89894284	1.14902	1.25458	0.802101	0.637635	1.2018	0.719868	0.720694
Gabrr2	chr4	33078796	33085564	1.00086	0.695063	0.471113	0.539259	0.847961	0.505186	0.720604
Gmppa	chr1	75442224	75443179	0.903663	0.671103	0.38279	0.554262	0.787383	0.468526	0.720301
Gas7	chr11	67586500	67605419	0.987715	0.582119	0.464203	0.469879	0.784917	0.467041	0.720264
Olfr101	chr17	37299446	37300484	0.437618	0.308746	0.150947	0.283325	0.373182	0.217136	0.720184
Rprml	chr11	103649509	103650580	0.424147	0.149621	0	0.329524	0.286884	0.164762	0.720096
1700029H14Rik	chr8	13566950	13584038	0.939224	0.541247	0.452757	0.427204	0.740235	0.43998	0.720069
Zscan20	chr4	128519109	128528312	1.00778	0.697061	0.562313	0.454163	0.852419	0.508238	0.719638
Ano2	chr6	125646339	125661967	0.99496	0.71838	0.441532	0.580123	0.85667	0.510828	0.719617
Rftn1	chr17	50239404	50241524	1.00755	0.302487	0.443661	0.333097	0.65502	0.388379	0.719597
Olfr1513	chr14	52349103	52350044	0.820557	0.170269	0.332982	0.25	0.495413	0.291491	0.719429
Adamtsl2	chr2	27079379	27108981	0.955357	0.588773	0.423834	0.495215	0.772065	0.459524	0.719389
Sla	chr15	66782542	66831829	0.853319	0.610707	0.428509	0.441968	0.732013	0.435239	0.719261
Ces3b	chr8	105083755	105093929	1.01885	0.672576	0.441859	0.567051	0.845714	0.504455	0.71883
Gmppa	chr1	75442166	75443173	0.857046	0.636483	0.363042	0.525669	0.746764	0.444356	0.718761
B230216G23Rik	chr6	142422617	142423619	0.634655	0.479742	0.364852	0.293494	0.557199	0.329173	0.718756
Myh6	chr14	54952246	54966641	0.862247	0.527366	0.424878	0.400788	0.694807	0.412833	0.718599
Olfr1417	chr19	11828077	11829024	1.29499	0.733164	0.716894	0.496835	1.01408	0.606864	0.718564
Slc34a2	chr5	53049353	53071664	1.0393	0.66615	0.485011	0.53302	0.852727	0.509015	0.717998
Cabp5	chr7	13398132	13408887	0.773591	0.656129	0.417992	0.432421	0.71486	0.425206	0.717978
Muc20	chr16	32776362	32776960	1.29043	0.535538	0.698205	0.393155	0.912982	0.54568	0.717911
Vwa3a	chr7	120786481	120792762	1.40415	0.723414	0.665751	0.60918	1.06378	0.637466	0.717685
Atp1a2	chr1	172274543	172298064	1.17334	0.756896	0.54674	0.608222	0.96512	0.577481	0.71766
Arhgef7	chr8	11713264	11722620	0.670584	0.54853	0.307288	0.415277	0.609557	0.361283	0.717609
Insl5	chr4	103039272	103041617	0.717108	0.70648	0.646234	0.200767	0.711794	0.423501	0.717451
Ly6a	chr15	74994878	74997634	1.26989	0.542984	0.549897	0.533868	0.906435	0.541882	0.717435
Krt15	chr11	100131758	100135928	1.15552	0.704999	0.689354	0.423459	0.930258	0.556407	0.717343
Ces3b	chr8	105088619	105093123	0.989105	0.723937	0.382947	0.640371	0.856521	0.511659	0.717064
Ctrc	chr4	141844836	141845228	1.61974	0.680211	0.931162	0.449427	1.14998	0.690295	0.716826
Gja4	chr4	127311421	127314039	0.67708	0.387868	0.17965	0.449598	0.532474	0.314624	0.716648
4933402P03Rik	chr11	69816566	69818465	1.14868	0.73162	0.412722	0.712696	0.940149	0.562709	0.716621
Dbh	chr2	27189382	27209937	0.975463	0.587808	0.508641	0.42389	0.781636	0.466266	0.716575
Lrrc18	chr14	33018284	33023337	0.872665	0.444304	0.351693	0.431019	0.658484	0.391356	0.716455
Gpr26	chr7	131966460	131994405	0.906247	0.5242	0.394714	0.457162	0.715223	0.425938	0.716286
Lrrc3	chr10	77893420	77896111	1.68902	0.556095	0.757372	0.590499	1.12256	0.673936	0.716144
Gas7	chr11	67547453	67585532	0.976714	0.687963	0.5107	0.483925	0.832338	0.497312	0.716028
Dnm3	chr1	162477680	162479943	0.682831	0.543147	0.415639	0.312058	0.612989	0.363848	0.71576
Ano1	chr7	144654095	144669377	0.97881	0.689166	0.465211	0.531619	0.833988	0.498415	0.715747
Prss30	chr17	23972839	23974801	0.787534	0.381306	0.213054	0.479877	0.58442	0.346466	0.71571
Ntm	chr9	28996231	29014259	0.716238	0.560475	0.405953	0.352681	0.638357	0.379317	0.715674
Helz2	chr2	181227622	181235754	0.872137	0.427296	0.417813	0.354712	0.649716	0.386263	0.715572
Gyltl1b	chr2	92365792	92366521	0.871999	0.585913	0.143228	0.725855	0.728956	0.434541	0.715492
Chi3l1	chr1	134182474	134186551	0.802779	0.747298	0.333308	0.591925	0.775038	0.462617	0.715457
Olfr1028	chr2	85951065	85952039	0.373075	0.219342	0.160856	0.181154	0.296208	0.171005	0.715448
Chi3l1	chr1	134182481	134186561	0.802189	0.746748	0.333063	0.59149	0.774469	0.462277	0.715436
Dnmt3l	chr10	78031855	78038260	0.695585	0.375571	0.367236	0.266527	0.535578	0.316882	0.715019
Mtmr4	chr11	87588868	87589994	0.726205	0.0948794	0.324709	0.156721	0.410542	0.240715	0.714993
Trem2	chr17	48346488	48352273	1.16304	0.674544	0.469834	0.630875	0.918791	0.550355	0.714966
B430306N03Rik	chr17	48316409	48324199	0.682816	0.528401	0.348923	0.370283	0.605608	0.359603	0.714789
Krt78	chr15	101946004	101954287	0.790375	0.509862	0.34709	0.426424	0.650119	0.386757	0.714665
Fgfr3	chr5	33734605	33735564	1.18408	0.668307	0.435651	0.674608	0.926192	0.55513	0.714286
Myom2	chr8	15106025	15108840	0.904204	0.341748	0.259905	0.480868	0.622976	0.370386	0.714024
9030619P08Rik	chr15	75427607	75431829	0.936718	0.7976	0.718004	0.320654	0.867159	0.519329	0.713795
Ntm	chr9	28996494	29014259	0.708926	0.553725	0.403135	0.347961	0.631326	0.375548	0.713757
Mpeg1	chr19	12460779	12465284	0.998976	0.771237	0.498881	0.561833	0.885107	0.530357	0.713566
Rad23b	chr4	55410443	55418842	0.714505	0.483727	0.298732	0.413526	0.599116	0.356129	0.712889
Siglech	chr7	55768236	55777560	0.906933	0.74535	0.515773	0.473525	0.826141	0.494649	0.712854
Cdc34-ps	chr11	94741782	94743014	0.553145	0.433614	0.296794	0.286496	0.493379	0.291645	0.712767
Ccdc106	chr7	5057197	5060785	0.608105	0.387316	0.145662	0.442915	0.497711	0.294289	0.712763
Siglech	chr7	55768236	55777606	0.902481	0.741692	0.513242	0.4712	0.822086	0.492221	0.712721
4932415M13Rik	chr17	53723751	53725733	0.366867	0.539229	0.237268	0.296898	0.453048	0.267083	0.712525
Sla	chr15	66780819	66831646	0.844462	0.601671	0.424783	0.439002	0.723066	0.431892	0.712426
Ctla4	chr1	60909025	60915832	1.14206	0.965943	0.575919	0.691832	1.054	0.633876	0.712388
Krt83	chr15	101431490	101438804	0.466185	0.285047	0.214401	0.225359	0.375616	0.21988	0.712214
Kcnf1	chr12	17172102	17176888	0.930837	0.312724	0.371309	0.368968	0.62178	0.370138	0.712199
Olfr1408	chr1	173130200	173131236	1.27154	0.618683	0.453716	0.681291	0.945112	0.567503	0.712181
Cd72	chr4	43452601	43454626	0.62839	0.290281	0.309643	0.232477	0.459336	0.27106	0.711807
Aox4	chr1	58169624	58172247	1.03968	0.692757	0.478153	0.560927	0.866217	0.51954	0.711652
Nipal4	chr11	46148155	46166508	0.748147	0.547637	0.358889	0.413799	0.647892	0.386344	0.711227
Gm7853	chr14	36089358	36090816	0.529791	0.293157	0.322483	0.161412	0.411474	0.241947	0.711181
Rpl39l	chr16	10170226	10174630	1.15607	0.764646	0.593395	0.56135	0.960357	0.577373	0.710796
Gm10509	chr17	21690766	21691024	0.526662	0.206427	0.201846	0.227316	0.366545	0.214581	0.710683
Cacng1	chr11	107703218	107716522	0.939785	0.691161	0.455788	0.522153	0.815473	0.48897	0.710452
Pramel5	chr4	144270635	144274027	0.308216	0.204845	0.138669	0.156167	0.25653	0.147418	0.710144
Olfr659	chr7	104670704	104671672	1.07923	0.165525	0.377654	0.364551	0.622379	0.371102	0.70993
Des	chr1	75362030	75363638	1.18687	0.299056	0.487366	0.402501	0.742964	0.444933	0.709578
Clec10a	chr11	70169310	70170006	0.260938	0.306827	0.0750045	0.253407	0.283883	0.164206	0.709575
Sgsm3	chr15	81007938	81009950	0.338812	0.106239	0.0779107	0.175484	0.222525	0.126697	0.709451
Ceacam3	chr7	17150400	17163231	0.99923	0.41665	0.521477	0.325757	0.70794	0.423617	0.709241
Opn4	chr14	34590618	34600142	1.19817	0.522016	0.576294	0.457401	0.860095	0.516848	0.708786
Camp	chr9	109847375	109849456	0.58965	0.231115	0.200877	0.282781	0.410382	0.241829	0.708037
Myh6	chr14	54941921	54966607	0.734878	0.493779	0.368469	0.364883	0.614329	0.366676	0.708034
Sardh	chr2	27188393	27232697	0.925688	0.580441	0.443665	0.459784	0.753065	0.451724	0.707657
Pqlc3	chr12	16995642	17000408	0.715364	0.538347	0.329	0.419918	0.626855	0.374459	0.707603
Pqlc3	chr12	16995642	17000408	0.715364	0.538347	0.329	0.419918	0.626855	0.374459	0.707603
B430306N03Rik	chr17	48316165	48325525	0.738299	0.48547	0.340665	0.389942	0.611885	0.365303	0.707558
Dgki	chr6	37334292	37336535	0.709179	0.595639	0.465937	0.314839	0.652409	0.390388	0.706588
Olfr697	chr7	106740910	106741956	1.12911	1.12342	0.349519	1.01218	1.12627	0.680848	0.706389
Olfr524	chr7	140201743	140202800	1.28928	0.505336	0.691771	0.389532	0.897307	0.540651	0.70607
Grin2a	chr16	9577827	9992533	0.965162	0.624624	0.559204	0.396657	0.794893	0.47793	0.705899
Siglech	chr7	55768226	55778833	0.870109	0.730803	0.507602	0.455104	0.800456	0.481353	0.705863
Oas2	chr5	120733282	120738408	0.771555	0.53183	0.367079	0.413399	0.651692	0.390239	0.705542
Sla	chr15	66782078	66801593	0.859699	0.660225	0.436633	0.476647	0.759962	0.45664	0.705515
Slc34a2	chr5	53049353	53066300	1.06508	0.728718	0.515131	0.566239	0.8969	0.540685	0.705327
Ifi27l1	chr12	103434292	103437528	0.898976	0.363367	0.355304	0.400138	0.631172	0.377721	0.705297
Olfr716	chr7	107147226	107148329	0.78252	0.387424	0.378827	0.319972	0.584972	0.3494	0.705243
Phlda3	chr1	135766119	135769136	0.647829	0.37202	0.138577	0.46819	0.509924	0.303384	0.70518
Myh4	chr11	67240597	67260405	0.619744	0.477724	0.393227	0.261547	0.548734	0.327387	0.704327
Hcls1	chr16	36931400	36932073	0.674607	1.11054	0.465384	0.611461	0.892573	0.538422	0.704299
Grin2a	chr16	9577710	9994921	0.960784	0.621258	0.557225	0.395122	0.791021	0.476173	0.704067
Syna	chr5	134557254	134560171	0.74794	0.384769	0.394146	0.28247	0.566355	0.338308	0.703886
Pgam2	chr11	5801640	5803733	0.93369	0.459581	0.499313	0.337392	0.696635	0.418353	0.703674
Ces3b	chr8	105083763	105093591	1.03159	0.690813	0.452095	0.587012	0.861201	0.519553	0.703247
Gm15217	chr14	46381127	46383368	0.648971	0.786945	0.443035	0.42016	0.717958	0.431597	0.703176
Tmem255b	chr8	13435459	13461452	1.01453	0.744563	0.541002	0.520937	0.879547	0.53097	0.702854
Tmem255b	chr8	13435459	13461452	1.01453	0.744563	0.541002	0.520937	0.879547	0.53097	0.702854
Kif19a	chr11	114765388	114786179	0.72384	0.545137	0.34195	0.419079	0.634488	0.380514	0.70249
Kif19a	chr11	114765388	114786179	0.72384	0.545137	0.34195	0.419079	0.634488	0.380514	0.70249
Atp1a2	chr1	172278083	172298064	1.17642	0.765232	0.544182	0.630529	0.970826	0.587356	0.702108
Traf3ip3	chr1	193198126	193201502	0.915564	0.490791	0.4799	0.366116	0.703178	0.423008	0.701546
Trpv1	chr11	73238259	73260507	0.985025	0.619976	0.484035	0.484251	0.802501	0.484143	0.701371
Kcnt1	chr2	25863795	25888942	1.01793	0.525121	0.494759	0.435452	0.771523	0.465105	0.701331
Clic3	chr2	25457636	25458215	2.11664	0.553082	0.811212	0.812068	1.33486	0.81164	0.701191
Sec14l3	chr11	4064952	4076325	1.12332	0.723891	0.537765	0.579742	0.923606	0.558754	0.701035
Sec14l3	chr11	4064952	4076325	1.12332	0.723891	0.537765	0.579742	0.923606	0.558754	0.701035
BC048943	chr12	111979323	111980751	0.190911	0.523795	0.256086	0.1648	0.357353	0.210443	0.700975
Myom2	chr8	15119007	15131160	0.804322	0.461887	0.348406	0.411747	0.633105	0.380076	0.700965
Ces1f	chr8	93273924	93275346	1.11834	0.450861	0.36738	0.579233	0.784601	0.473306	0.700858
Adamts8	chr9	30943458	30963838	0.905756	0.529897	0.428362	0.436196	0.717827	0.432279	0.700688
Fam213a	chr14	40998911	41006976	0.507335	0.424217	0.291658	0.262769	0.465776	0.277214	0.700606
Tubgcp3	chr8	12706944	12719127	0.776219	0.767917	0.390455	0.541201	0.772068	0.465828	0.700155
Usp24	chr4	106088714	106105068	0.861831	0.585152	0.393165	0.478775	0.723491	0.43597	0.700022
Npr1	chr3	90457399	90458939	1.18023	0.208168	0.339248	0.496674	0.694201	0.417961	0.699952
Prl6a1	chr13	27313946	27319252	0.368409	0.332453	0.24627	0.166407	0.350431	0.206338	0.699952
Tspan32	chr7	143005046	143019486	0.856412	0.581257	0.466995	0.399539	0.718834	0.433267	0.699489
Olfr243	chr7	103716596	103717546	0.430302	0.281096	0.109943	0.309542	0.355699	0.209743	0.698891
Manf	chr9	106906725	106908785	0.507412	0.285352	0.126827	0.342794	0.396382	0.234811	0.69886
Spag8	chr4	43648005	43650230	0.592357	0.744565	0.328793	0.476078	0.668461	0.402435	0.698832
Olfr1389	chr11	49430427	49431499	1.69501	0.946716	0.730822	0.877911	1.32086	0.804366	0.69882
Lyzl6	chr11	103631076	103635021	0.979429	0.379373	0.370955	0.447605	0.679401	0.40928	0.698473
1700015E13Rik	chr1	170302668	170327654	0.87527	0.626931	0.430996	0.475957	0.7511	0.453476	0.698429
Sox9	chr11	112684464	112691518	0.644487	0.492586	0.348274	0.333805	0.568536	0.34104	0.698155
Bpifb4	chr2	153938221	153964101	0.932877	0.611472	0.462567	0.47089	0.772175	0.466728	0.697626
Sectm1b	chr11	121056234	121056628	3.3382	2.30101	2.11759	1.34145	2.8196	1.72952	0.69731
Myh1	chr11	67200111	67224495	0.74398	0.495509	0.366601	0.379059	0.619744	0.37283	0.697295
Ceacam14	chr7	17812633	17815663	0.930072	0.740848	0.448443	0.563303	0.83546	0.505873	0.69728
Foxq1	chr13	31371299	31408880	0.687194	0.41398	0.353324	0.307048	0.550587	0.330186	0.697263
Oma1	chr4	103382500	103492040	0.879559	0.620347	0.437158	0.469211	0.749953	0.453184	0.697136
Atp1a2	chr1	172271709	172298064	1.10411	0.712022	0.529604	0.571861	0.908065	0.550733	0.697069
Ndnl2	chr7	64756113	64773652	0.909889	0.713267	0.485823	0.496778	0.811578	0.4913	0.696831
Mrpl23	chr7	142575634	142576538	1.40676	0.708922	0.115532	1.17099	1.05784	0.643262	0.696753
Oma1	chr4	103382521	103492022	0.879042	0.62008	0.437314	0.46884	0.749561	0.453077	0.696717
Vmn1r80	chr7	12192965	12193891	0.588589	0.230699	0.169185	0.317556	0.409644	0.243371	0.696641
[truncated: 20,252 more rows]
