# Supplementary material for: Chromatin dynamics and the role of G9a in gene regulation and enhancer silencing during early mouse development
Source: eLife. 2015 Nov 9;4:e09571. doi: 10.7554/eLife.09571 (PMC4729692; doi:10.7554/eLife.09571)
Supplement: Supplementary file 1. — DOI: http://dx.doi.org/10.7554/eLife.09571.031 [file elife-09571-supp1.xls]

## Sheet: Sheet1
Supplementary File 1. List of primers used in this study
Name	Sequence	Use
ASZ1 F	TTGCCTTCTCCACTACCTGA	ChIP-qPCR
ASZ1 R	AGCAGCGATAGTGAGGATGA	ChIP-qPCR
CDKN1A F	GCTAAGGGAGCTCACAGGAC	ChIP-qPCR
CDKN1A R	TGACACCCACGGTATTCAAC	ChIP-qPCR
ESRRB ENH. F	AGGTTTGAATGGGACAGGAG	ChIP-qPCR
ESRRB ENH. R	GATTGCACATCAAGGACTGG	ChIP-qPCR
GAPDH F	GCGTGGGGTTGTTCCTAATA	ChIP-qPCR
GAPDH R	TGCTGCACCTCTGGTAACTC	ChIP-qPCR
GPR20 ENH. F	GCCAGACCTAAGACTGGAACCAGGG	ChIP-qPCR
GPR20 ENH. R	AGCCAGGGCAGGGAGTGTGC	ChIP-qPCR
HOXC10 F	AGCTTGTGTGTGGTGCTTTG	ChIP-qPCR
HOXC10 R	AGGTTGCCATTAGGCATGAG	ChIP-qPCR
PCSK5 F	CAATGAAGTGATGCCCTCCT	ChIP-qPCR
PCSK5 R	TGTGGTATTGCTGCTTCTGG	ChIP-qPCR
PRDM1 ENH. F	TCCACCACCTGTCCTCAGTA	ChIP-qPCR
PRDM1 ENH. R	GAGGGTCACAGGATTCGTTT	ChIP-qPCR
ERNA HTRA1 F	CCCCCAATGTTTCGATTTA	eRNA RTqPCR & ChIP-qPCR
ERNA HTRA1 R	CATGACCTGGACTGCTTACG	eRNA RTqPCR & ChIP-qPCR
ERNA PDGFA R	CCTCATCTTCCTCCTTCCAC	eRNA RTqPCR & ChIP-qPCR
ERNA PDGFA F	AAATCAGACAGGCAGGGTGT	eRNA RTqPCR & ChIP-qPCR
ERNA SMARCAD1 F	AGTCGCTGTTGGTATTGTGATGA	eRNA RTqPCR & ChIP-qPCR
ERNA SMARCAD1 R	CCCTTTGGTGTGAGCGTGAA	eRNA RTqPCR & ChIP-qPCR
ERNA XPNPEP1 F	TCATGCCTCAGAGGTCTGTC	eRNA RTqPCR & ChIP-qPCR
ERNA XPNPEP1 R	GCCTCTCCATACCGTACACA	eRNA RTqPCR & ChIP-qPCR
ERNA ARIDB5 F1	GGATTCAGAGAGCAAGCACA	eRNA RTqPCR
ERNA ARIDB5 R1	TGCTTCTGCAGGAATCTCAG	eRNA RTqPCR
ERNA CABP1	CAGTCCCCTCCTCTTCCTGG	eRNA RTqPCR
ERNA CABP1	CTGTGAGTCCTGGGCTCCTT	eRNA RTqPCR
ERNA EIF4A2 F	GACCAGAGGACACCGAGGAA	eRNA RTqPCR
ERNA EIF4A2 R	GATGGGGATGGGAGTAGGGG	eRNA RTqPCR
ERNA ESRRB F	AGGTTTGAATGGGACAGGAG	eRNA RTqPCR
ERNA ESRRB R	GGATTGCACATCAAGGACTG	eRNA RTqPCR
ERNA HIST1H3C F	TGGAACAGTGGTCACCTGATGT	eRNA RTqPCR
ERNA HIST1H3C R	GGCCCTTCCCTGCAATTTTG	eRNA RTqPCR
ERNA MORC1 F	CTCCTCAGGGAAAGCACATT	eRNA RTqPCR
ERNA MORC1 R	TCAACACCGACACATGTCAA	eRNA RTqPCR
ERNA OTX2 F	GGAGGGGAAGTCTGACCGAT	eRNA RTqPCR
ERNA OTX2 R	GCTGGAGGGGAGGAAGTAGG	eRNA RTqPCR
ERNA SCD3 F	CTTCTCAGTTGGCCCATTCT	eRNA RTqPCR
ERNA SCD3 R	TCAGGATTGAGAACCACCAG	eRNA RTqPCR
ERNA ZFP870 F1	TCCTCCCTCTGCCATCCATG	eRNA RTqPCR
ERNA ZFP870 R1	ATCGGCATGAGTCAGGAGCA	eRNA RTqPCR
RT_CDKN1C F	GCACTGAGAGCGAGTAGAGA	RTqPCR
RT_CDKN1C R	CATGTGCAAGGAGTACGCTG	RTqPCR
RT_EZH2 F	TTACTGCTGGCACCGTCTGATGTG	RTqPCR
RT_EZH2 R	CTTCATCCTGAGAAATAATCTCC	RTqPCR
RT_HOXD13 F	ACACTTGGCAGAGTGACTGG	RTqPCR
RT_HOXD13 R	TGAGGAGATGGCCTTAGCTC	RTqPCR
RT_LEFTY2 F	GTCTCCCTGTCCACAGATGTA	RTqPCR
RT_LEFTY2 R	AGAGCAAAGGTCTGACGAGA	RTqPCR
RT_NANOG F	AATGCTGCTCCGCTCCATAA	RTqPCR
RT_NANOG R	TAAAATGCGCATGGCTTTCC	RTqPCR
RT_POU5F1 F	CCAATCAGCTTGGGCTAGAG	RTqPCR
RT_POU5F1R	CTGGGAAAGGTGTCCCTGTA	RTqPCR
RT_SFMBT2 F	TGCTTGTGTCTCTTTGGTGC	RTqPCR
RT_SFMBT2 R	CAGTTCAGCTCCTCCTTCCA	RTqPCR
scRT_ASZ1 F	CCCGAATCCACACACTGTAA	scRTqPCR
scRT_ASZ1 R	GGGAAAATGACCCAACTCAT	scRTqPCR
scRT_CD3E F	TGCCTCTCCAGATTTCCCCT	scRTqPCR
scRT_CD3E R	CAGAGAGGGGGCTGGTGTAT	scRTqPCR
scRT_CDX2 F	GAAGAGTCGGAATGGGAAAA	scRTqPCR
scRT_CDX2 R	TATGGACCTCAGGGGAAGAC	scRTqPCR
scRT_FOXJ1 F	CAGCAGTGTGGCCTTCAGAG	scRTqPCR
scRT_FOXJ1 R	GACAGTGCTCAAGTCAGGGC	scRTqPCR
scRT_EHMT2 F	GAGCCTTGCAGACCATCC	scRTqPCR
scRT_EHMT2 R	CCTCGGCATCAGAGATCAG	scRTqPCR
scRT_NANOG F	CCTTGGAGTCCCCCAAGAGT	scRTqPCR
scRT_NANOG R	AGCTGGCATCGGTTCATCAT	scRTqPCR
scRT_POU5F1 F	ACTTTGGCACCCCAGGCTAT	scRTqPCR
scRT_POU5F1 R	GACGGGAACAGAGGGAAAGG	scRTqPCR
scRT_CDKN1A F	ACCCAAGCTCTGTGTTTCCT	scRTqPCR
scRT_CDKN1A R	AAACGGATGCAGATGGGTTG	scRTqPCR
scRT_RHOX5 F	CTGCGGCCAGAAGAAACAGG	scRTqPCR
scRT_RHOX5 R	CCCCATCTCACTCCACGACA	scRTqPCR
scRT_SOHLH2 F	CTGGGTTTGCAGGCTTGTGA	scRTqPCR
scRT_SOHLH2 R	GGAAAGCAATGCCCCTCCTG	scRTqPCR
scRT_IAP-3'LTR F	GCACATGCGCAGATTATTTGTT	scRTqPCR & ChIP-qPCR
scRT_IAP-3'LTR R	CCACATTCGCCGTTACAAGAT	scRTqPCR & ChIP-qPCR
scRT_MTD F	TAAGAAAGCAGGCTGAGCAA	scRTqPCR & ChIP-qPCR
scRT_MTD R	AACTCGAGGCAGGAACCTAA	scRTqPCR & ChIP-qPCR
scRT_MTEb_LTR F	CCGGAGAGGTTTAACTGAGG	scRTqPCR & ChIP-qPCR
scRT_MTEb_LTR R	CTCAGCTCGCTTTCTCCTTT	scRTqPCR & ChIP-qPCR
scRT_Lx8b F	CATACGGAAGCCCAAGAGAT	scRTqPCR & ChIP-qPCR
scRT_Lx8b R	CCAACTTTCCCATCACCATT	scRTqPCR & ChIP-qPCR
