# Supplementary figures and images for: Chromatin dynamics and the role of G9a in gene regulation and enhancer silencing during early mouse development
Source: eLife journal article supplement (doi:10.7554/elife.09571), 2015-11-07

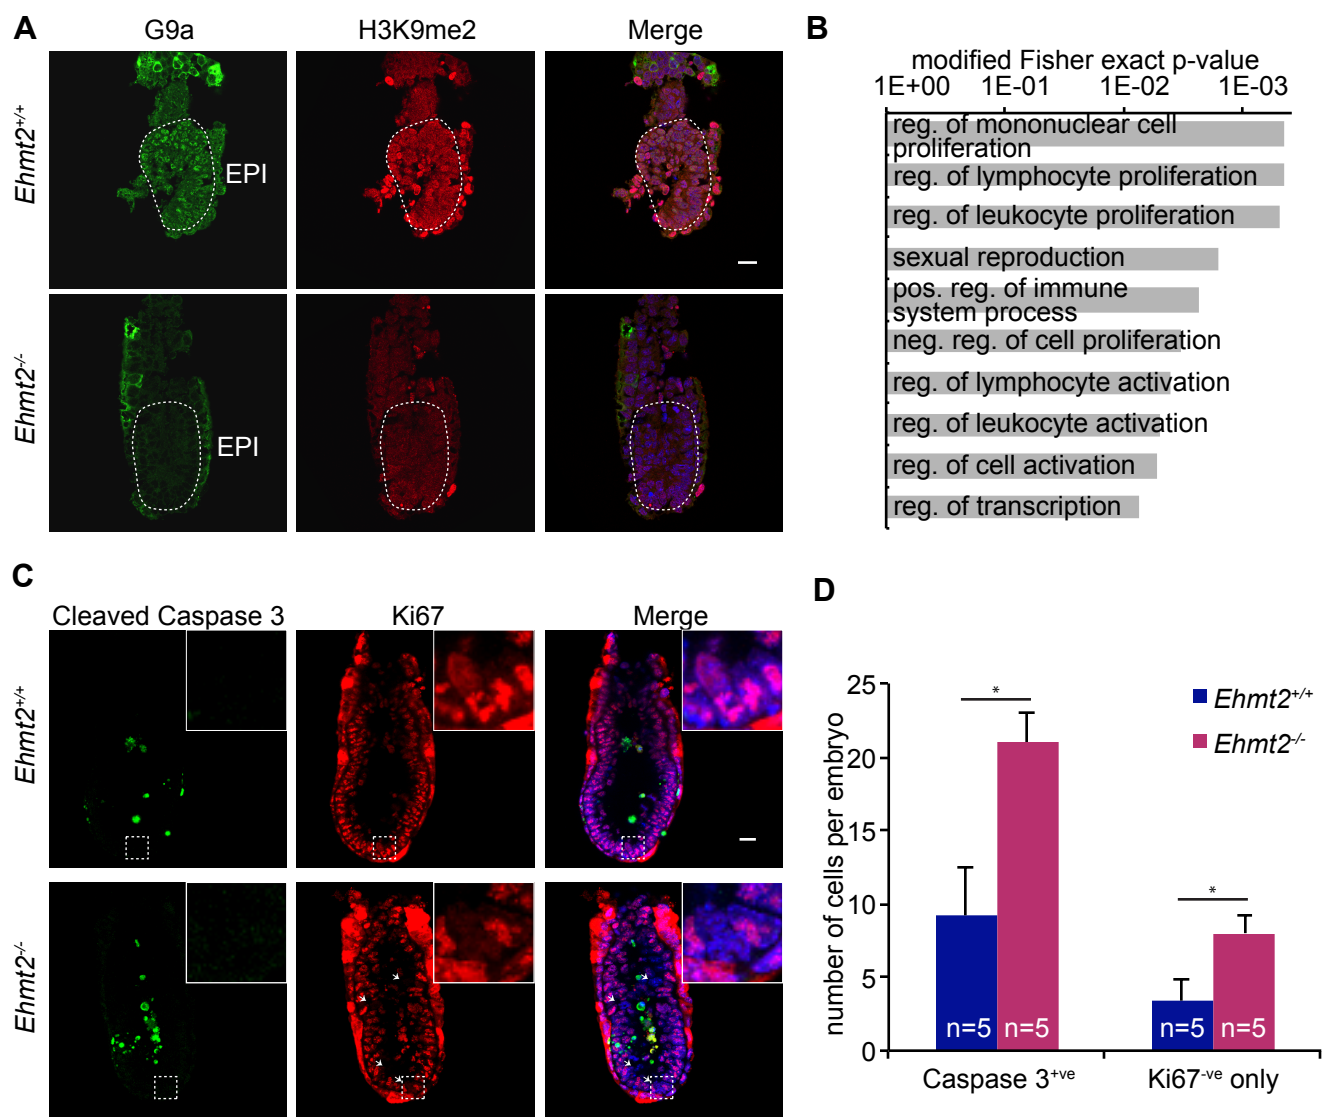

Figure 2-figure supplement 1.

Supplement: supp [file elife_poa_e09571_Figure_2_figure_supplement_1.pdf › elife_poa_e09571_Figure_2_figure_supplement_1.pdf]

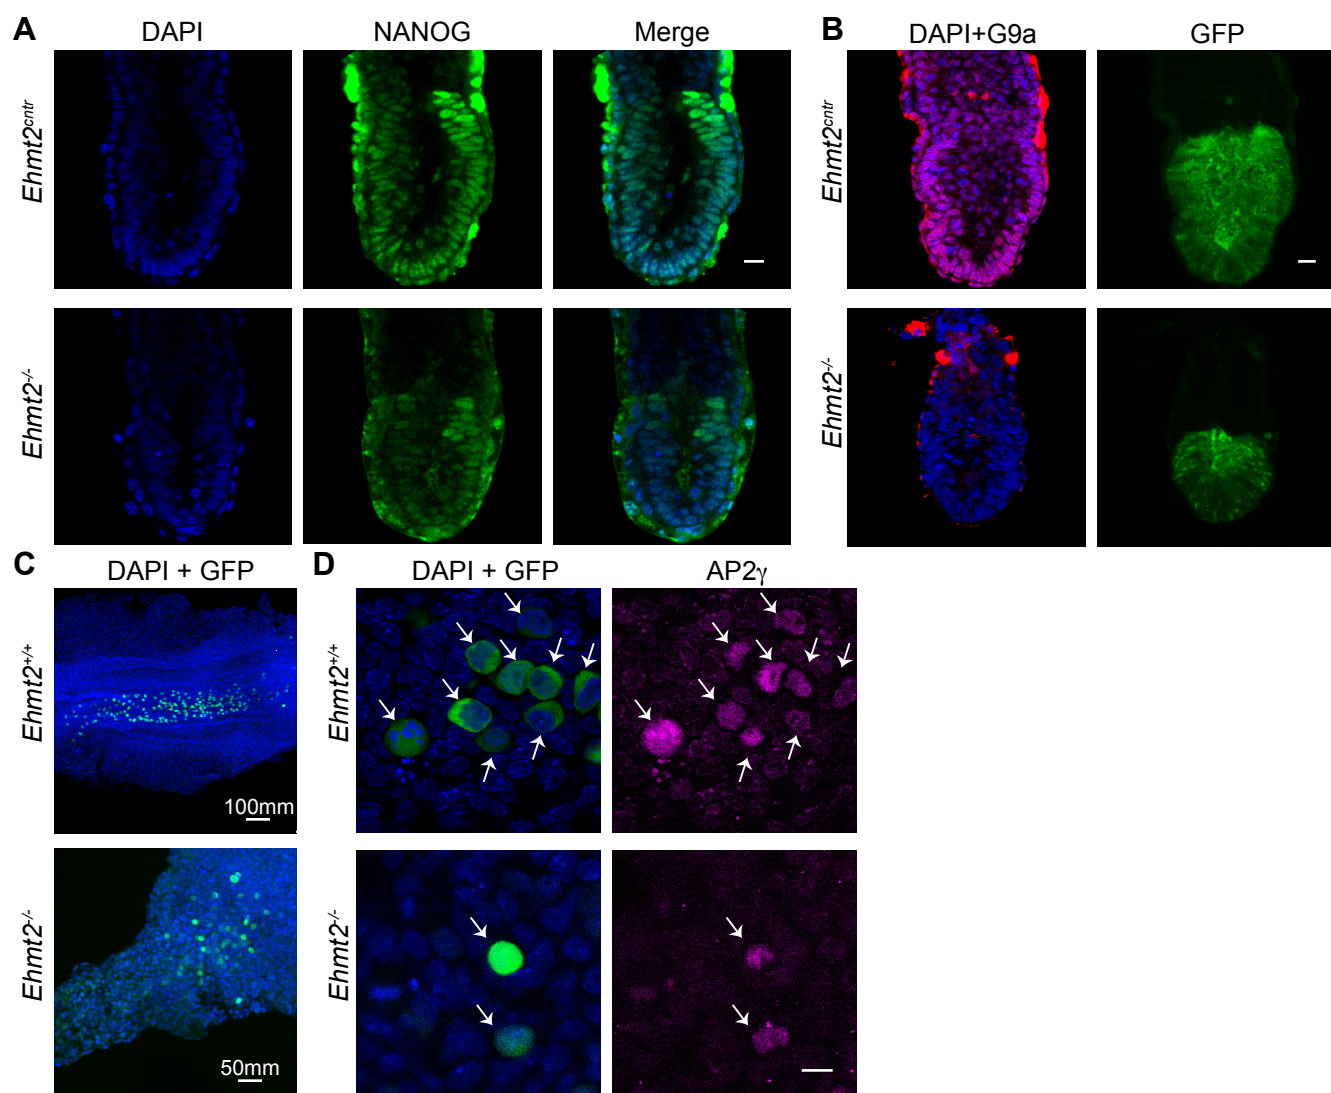

Figure 2-figure supplement 2.

Supplement: supp [file elife_poa_e09571_Figure_2_figure_supplement_2.pdf › elife_poa_e09571_Figure_2_figure_supplement_2.pdf]

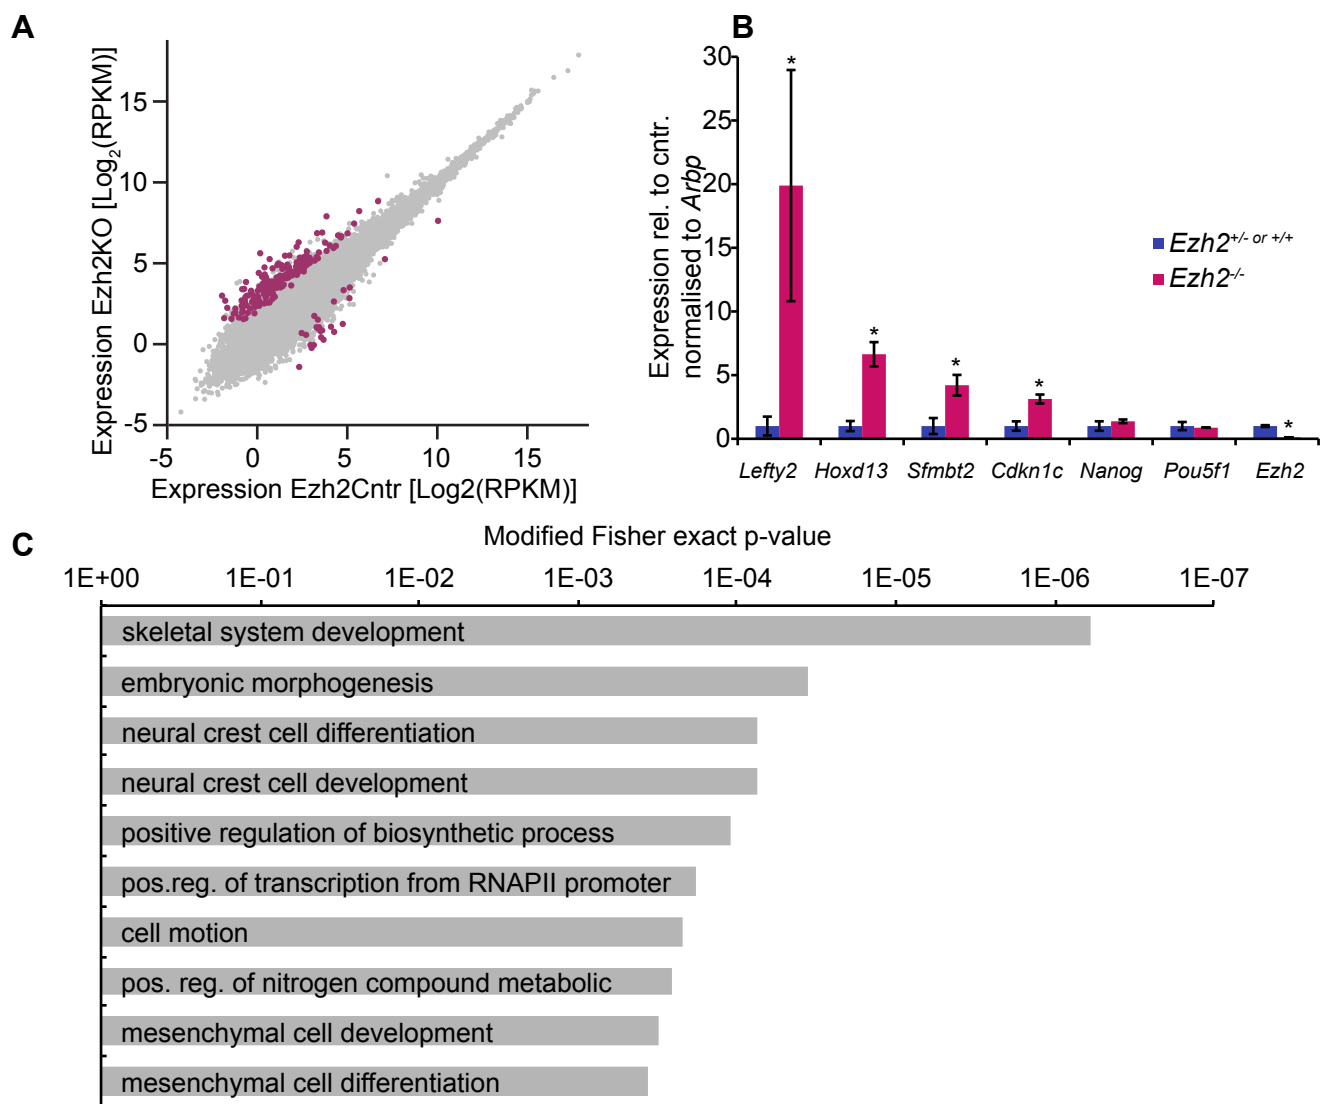

**Figure 2-figure supplement 3.**

Supplement: supp [file elife_poa_e09571_Figure_2_figure_supplement_3.pdf › elife_poa_e09571_Figure_2_figure_supplement_3.pdf]

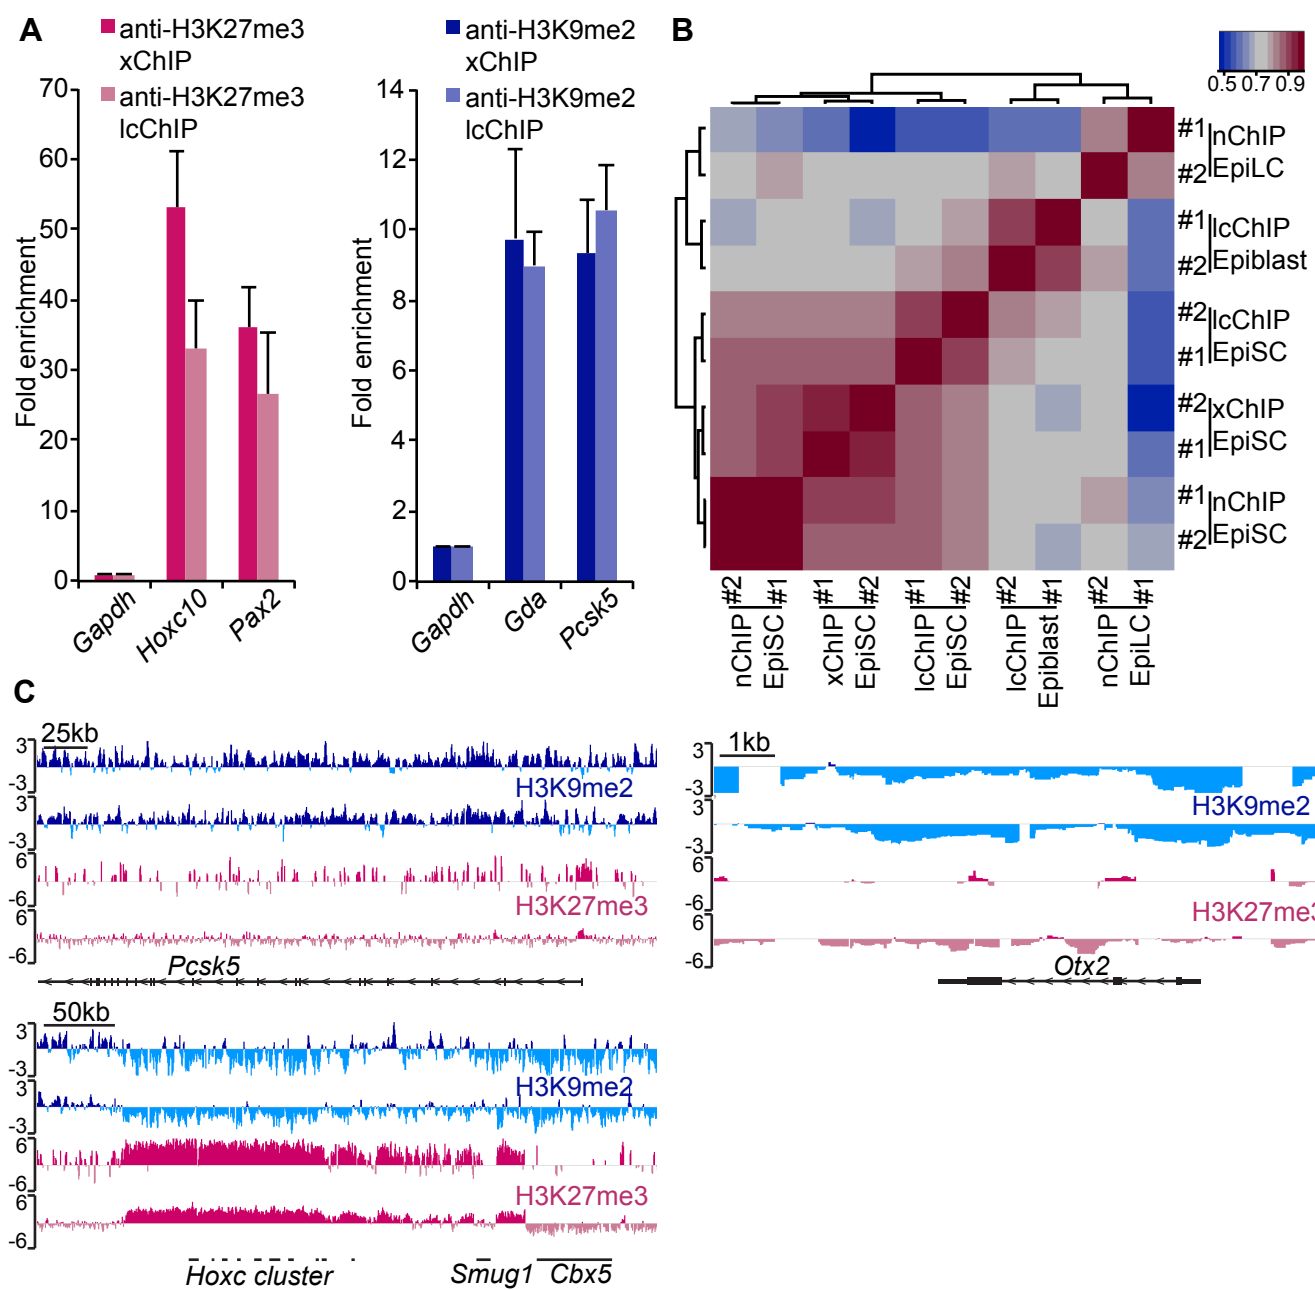

**Figure 3-figure supplement 1.**

Supplement: supp [file elife_poa_e09571_Figure_3_figure_supplement_1.pdf › elife_poa_e09571_Figure_3_figure_supplement_1.pdf]

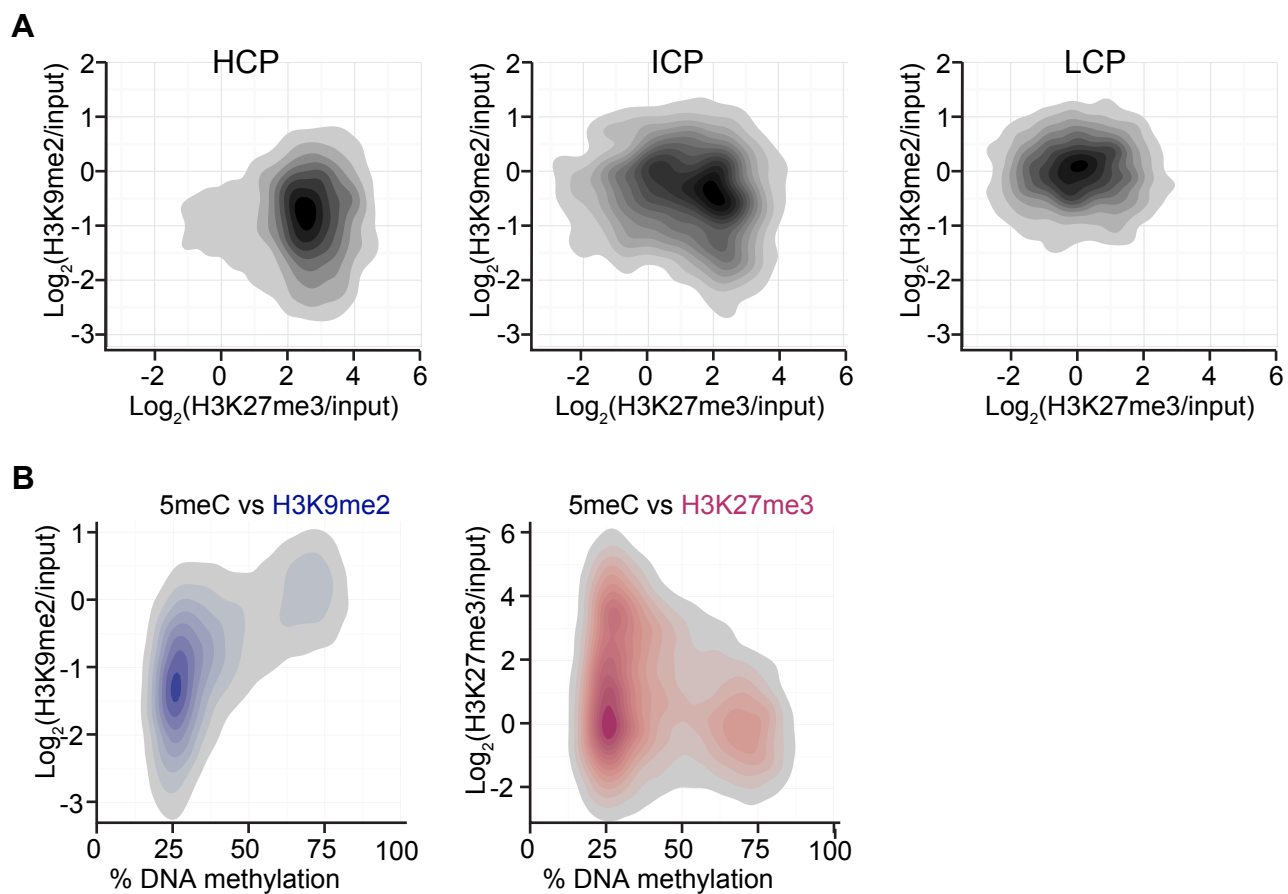

**Figure 3-figure supplement 2.**

Supplement: supp [file elife_poa_e09571_Figure_3_figure_supplement_2.pdf › elife_poa_e09571_Figure_3_figure_supplement_2.pdf]

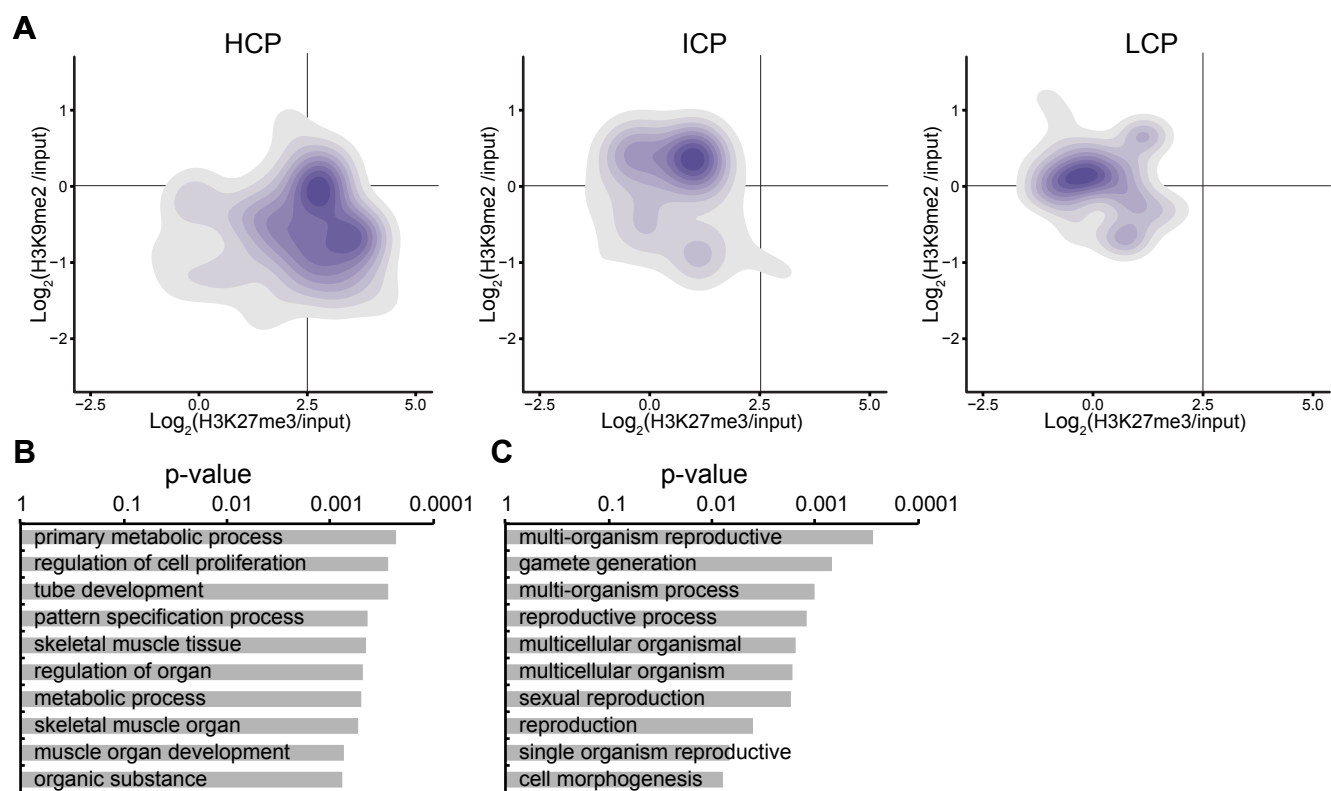

**Figure 3-figure supplement 3.**

Supplement: supp [file elife_poa_e09571_Figure_3_figure_supplement_3.pdf › elife_poa_e09571_Figure_3_figure_supplement_3.pdf]

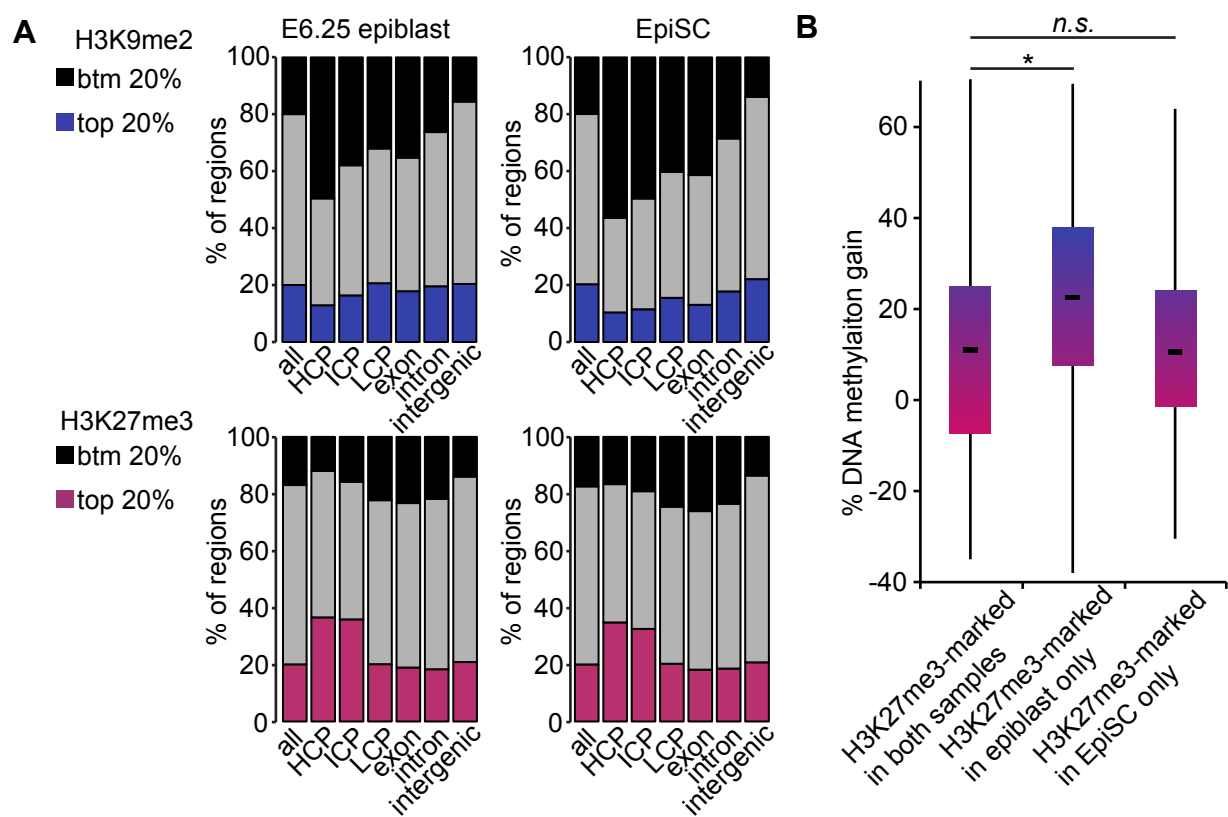

**Figure 4-figure supplement 1.**

Supplement: supp [file elife_poa_e09571_Figure_4_figure_supplement_1.pdf › elife_poa_e09571_Figure_4_figure_supplement_1.pdf]

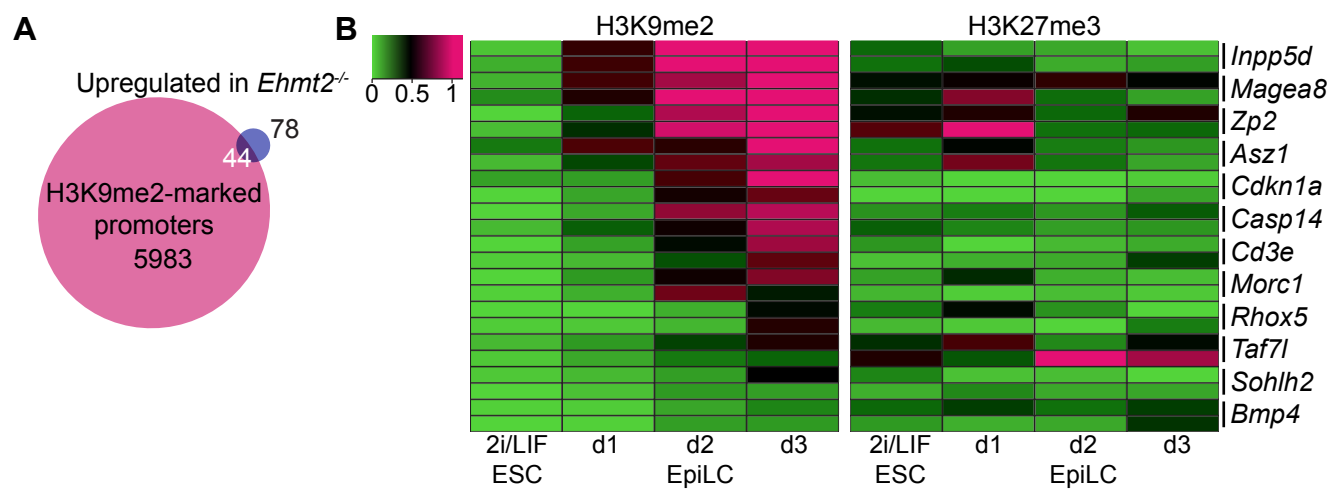

**Figure 5-figure supplement 1.**

Supplement: supp [file elife_poa_e09571_Figure_5_figure_supplement_1.pdf › elife_poa_e09571_Figure_5_figure_supplement_1.pdf]

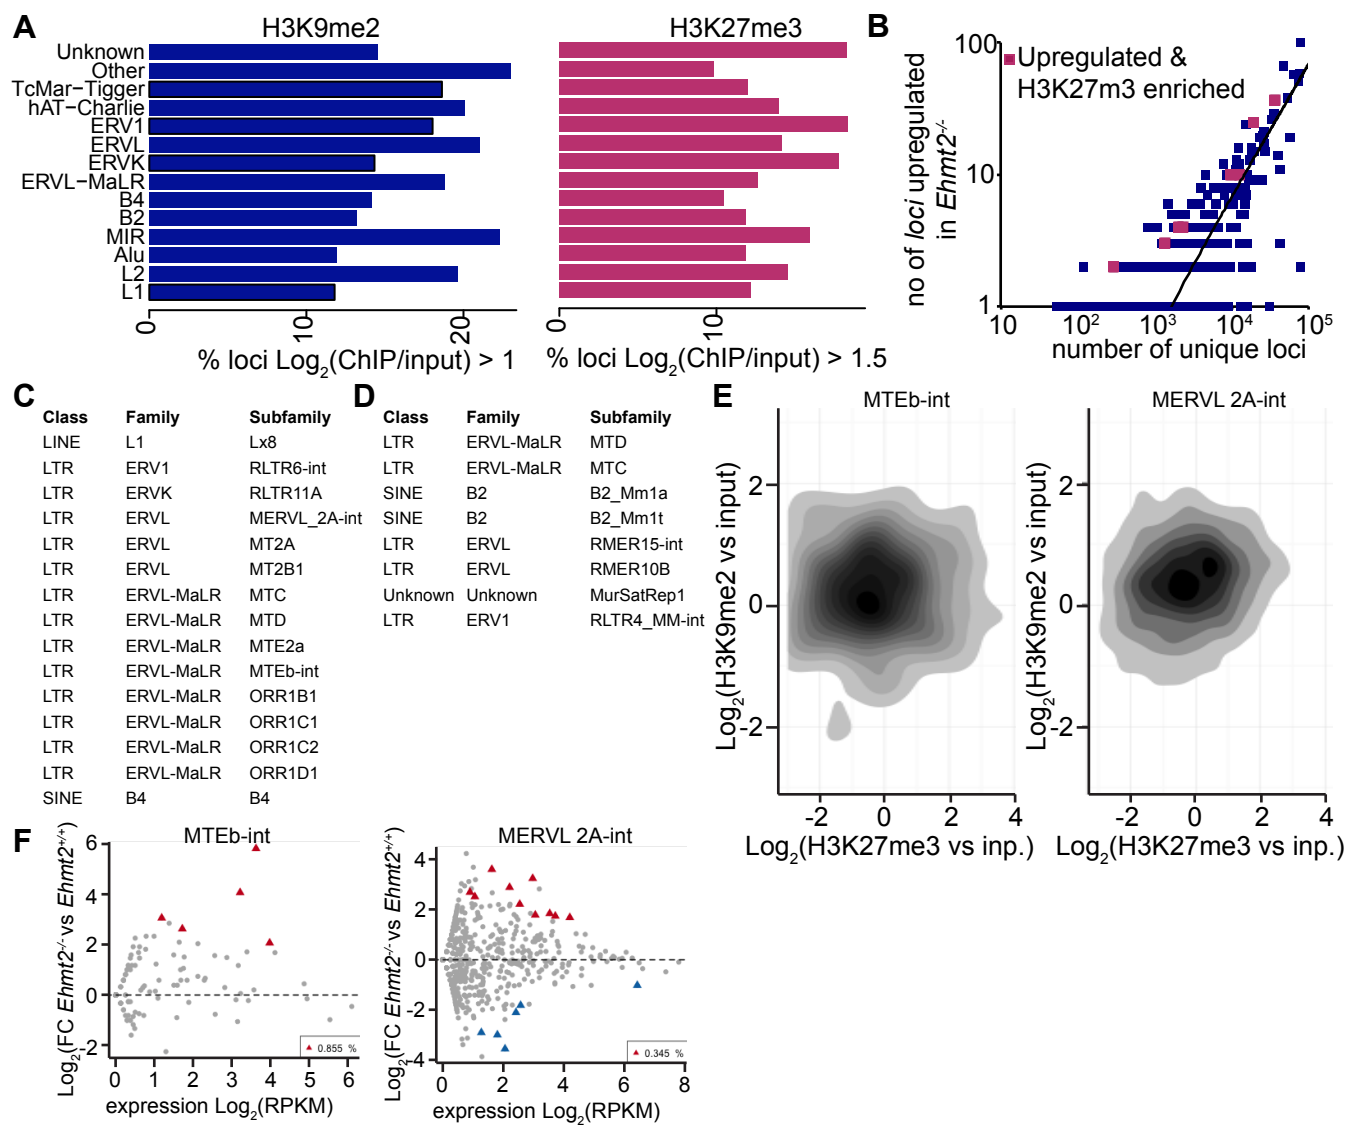

**Figure 5-figure supplement 2.**

Supplement: supp [file elife_poa_e09571_Figure_5_figure_supplement_2.pdf › elife_poa_e09571_Figure_5_figure_supplement_2.pdf]

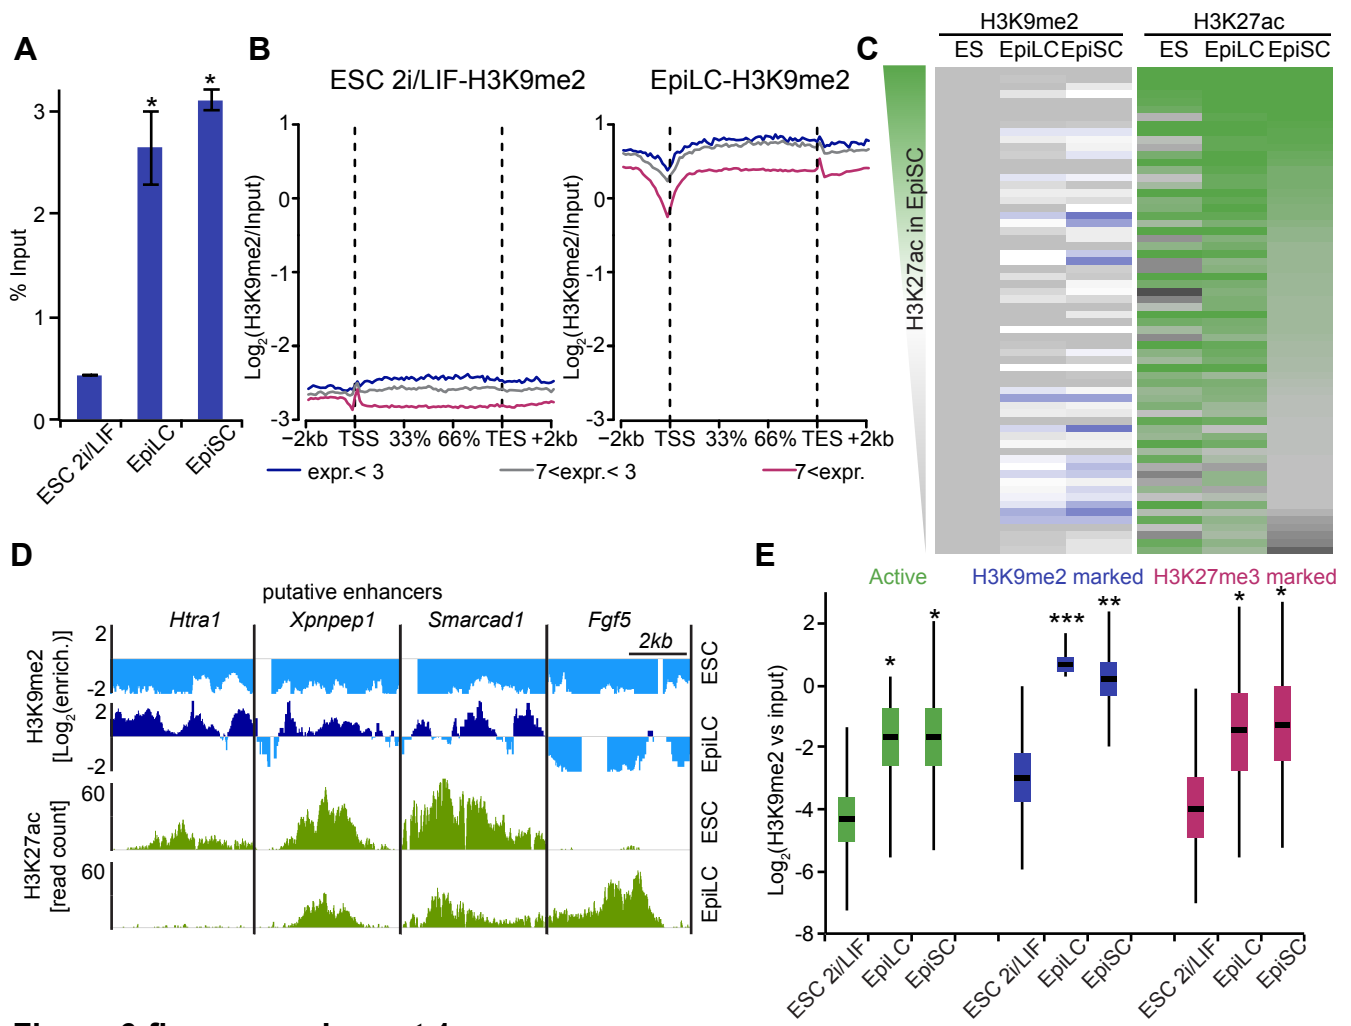

Figure 6-figure supplement 1.

Supplement: supp [file elife_poa_e09571_Figure_6_figure_supplement_1.pdf › elife_poa_e09571_Figure_6_figure_supplement_1.pdf]

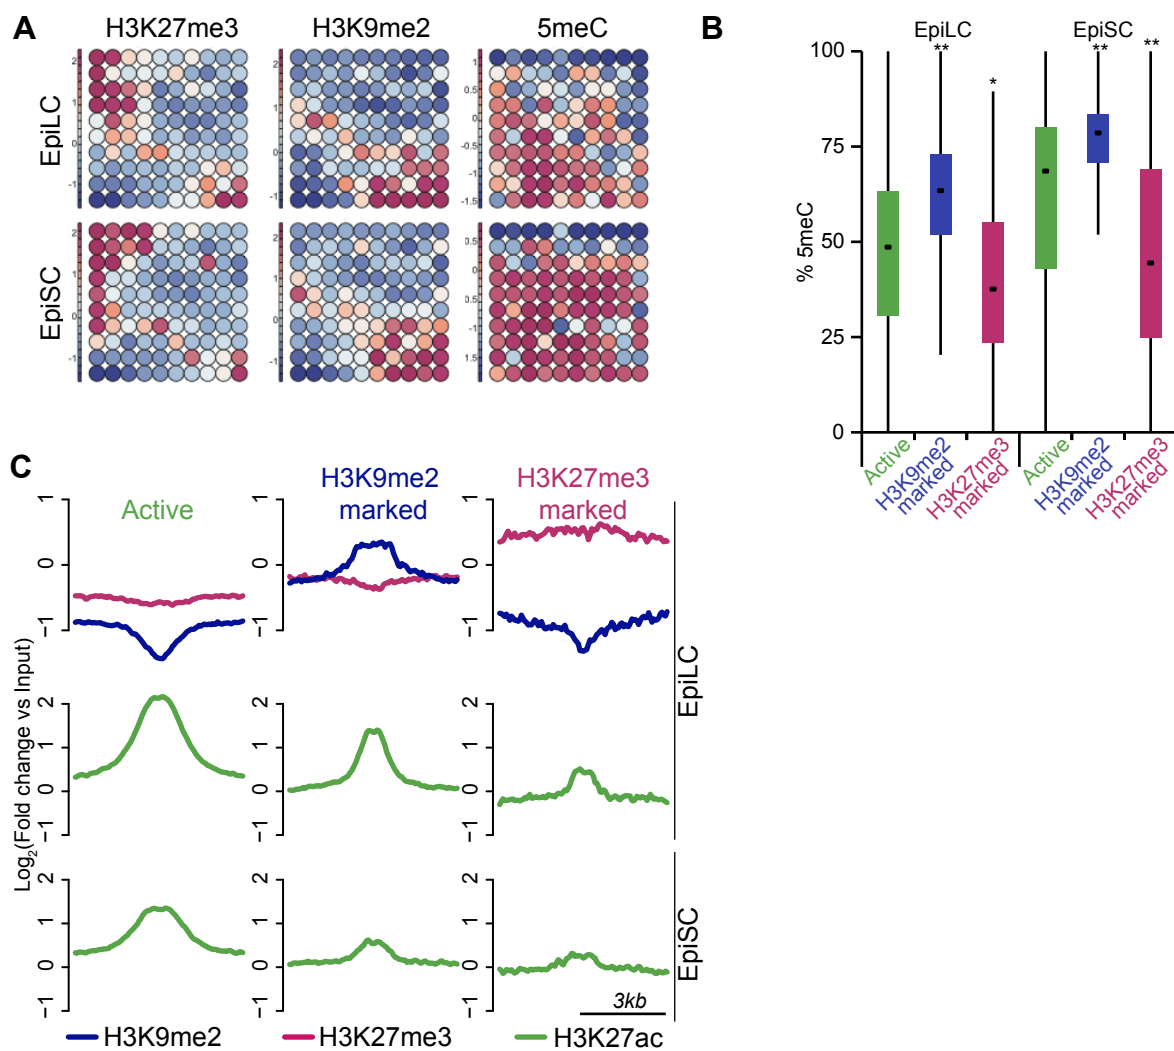

**Figure 6-figure supplement 2.**

Supplement: supp [file elife_poa_e09571_Figure_6_figure_supplement_2.pdf › elife_poa_e09571_Figure_6_figure_supplement_2.pdf]

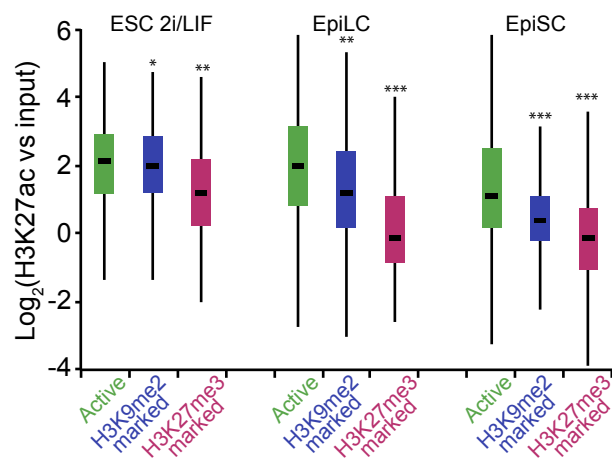

Figure 7-figure supplement 1.

Supplement: supp [file elife_poa_e09571_Figure_7_figure_supplement_1.pdf › elife_poa_e09571_Figure_7_figure_supplement_1.pdf]

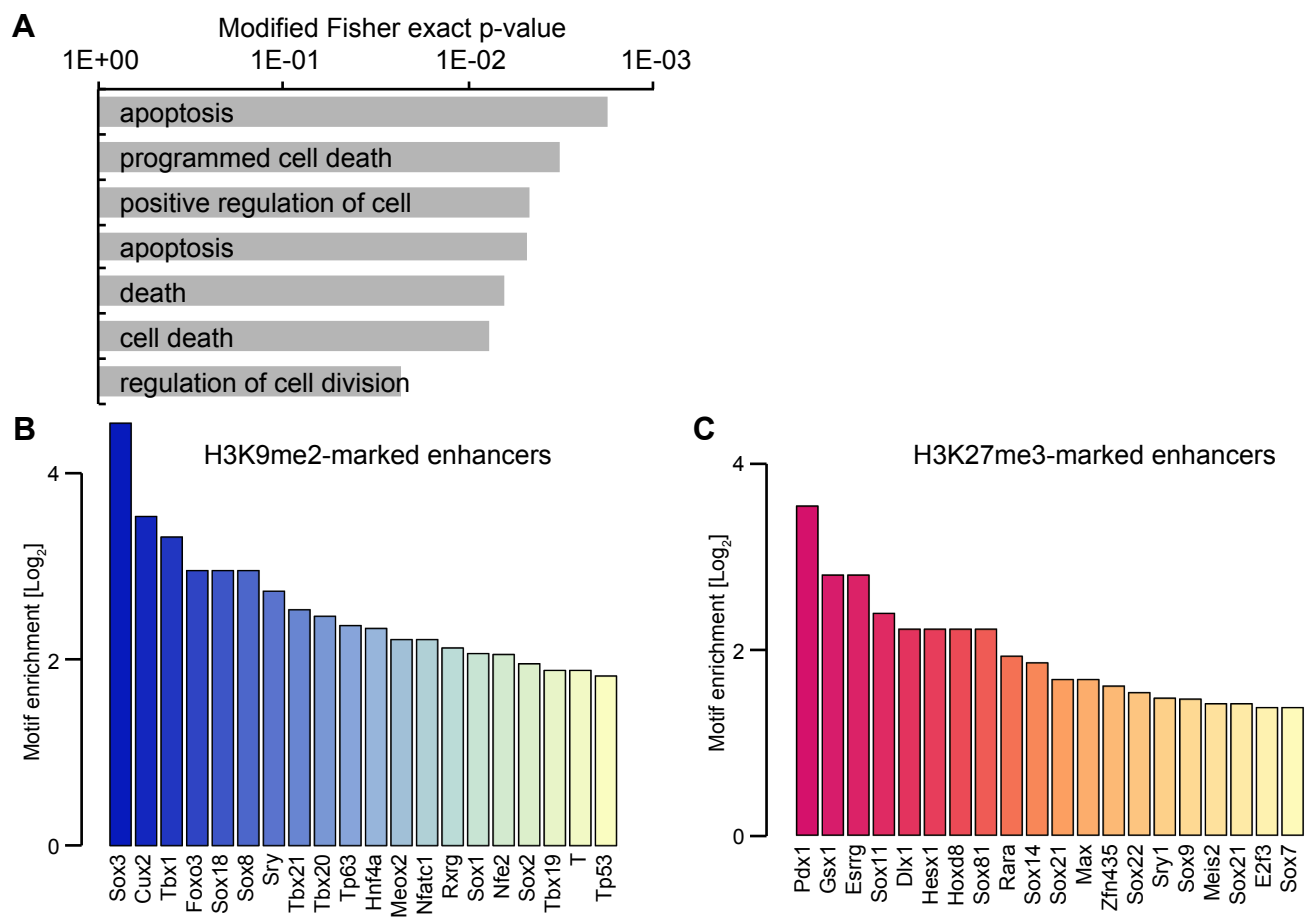

**Figure 8-figure supplement 1.**

Supplement: supp [file elife_poa_e09571_Figure_8_figure_supplement_1.pdf › elife_poa_e09571_Figure_8_figure_supplement_1.pdf]
